# Supplementary material for: A photocatalytic traceless C–N bond formation/cleavage strategy enabling the use of (α-chiral) alkyl aldehydes as deoxygenative (chiral) alkyl radical equivalents
Source: Royal Society of Chemistry journal article supplement (doi:10.1039/d3qo01059g), 2023-01-01

## Electronic Supplementary Information for

Photocatalytic Traceless C-N Bond Formation/ Cleavage Strategy Enabling ( $\alpha$ -Chiral)  
Alkyl Aldehydes as Deoxygenative (Chiral) Alkyl Radical Equivalents

Hanyang Bao,<sup>§a,c</sup> Limeng Zheng,<sup>§a,c</sup> Qian Liu,<sup>a</sup> Mingfeng Han,<sup>a</sup> Ya Li,<sup>a</sup> Miao Bao,<sup>c</sup> Yuanqiang Li,<sup>c</sup>

Pucha Yan<sup>c</sup> and Yunkui Liu<sup>\*a,b</sup>

<sup>a</sup> State Key Laboratory Breeding Base of Green Chemistry-Synthesis Technology, College of Chemical Engineering, Zhejiang University of Technology, Hangzhou 310014, P. R. China

Email: ykuiliu@zjut.edu.cn

<sup>b</sup> Key Laboratory of Organosilicon Chemistry and Material, Technology of Ministry of Education, Hangzhou Normal University, Hangzhou 311121, P. R. China

<sup>c</sup> Raybow (Hangzhou) Pharmaceutical Co., Ltd., Hangzhou 310018, P. R. China

## Table of Contents

|                                                                                                                                  |     |
|----------------------------------------------------------------------------------------------------------------------------------|-----|
| 1. General Information                                                                                                           | S3  |
| 2. Preparation of Substrates and Photosensitizers                                                                                | S4  |
| 3. General procedures for deoxygenative alkylation/cyclization of 2-biphenylisonitriles with ( $\alpha$ -chiral) alkyl aldehydes | S5  |
| 3.1. Optimization of reaction conditions for achiral alkyl aldehydes                                                             | S5  |
| 3.2. Optimization of reaction conditions for acyclic $\alpha$ -chiral amino aldehyde                                             | S7  |
| 3.3. Experimental details and characterization of products <b>4</b>                                                              | S7  |
| 3.4. 3 mmol-scale synthesis of <b>4a</b>                                                                                         | S34 |
| 4. Mechanistic Studies                                                                                                           | S35 |
| 4.1. Radical scavenging experiment                                                                                               | S35 |
| 4.2. Formation and detection of intermediate <b>6</b> when the reaction time was shorten to 4 h                                  | S35 |
| 4.3. Probing experiment on possible reaction intermediate                                                                        | S35 |
| 4.4. Detection of byproduct <b>4a'</b>                                                                                           | S37 |
| 4.5. KIE experiment                                                                                                              | S37 |
| 4.6 Deuterium-labeling experiments                                                                                               | S38 |
| 5. References                                                                                                                    | S39 |
| 6. Copies of $^1\text{H}$ and $^{13}\text{C}$ NMR Spectra                                                                        | S41 |

## 1. General Information

Unless otherwise noted, all reactions were carried out in flame-dried reaction vessels with Teflon screw caps under nitrogen. Solvents were purified and dried according to standard methods prior to use. Unless otherwise stated, all reagents were purchased from commercial suppliers and used as received. Flash column chromatography was performed on silica gel (200-300 mesh) with the indicated solvent mixtures. TLC analysis was performed on pre-coated, glass-backed silica gel plates and visualized with UV light,  $\text{KMnO}_4$  indicator or phosphomolybdic acid indicator.

Melting points are uncorrected.  $^1\text{H}$  NMR spectra were recorded on a spectrometer at 25 °C in  $\text{CDCl}_3$  at 400, 500 or 600 MHz, with TMS as internal standard.  $^{13}\text{C}$  NMR spectra were recorded on a spectrometer at 25 °C in  $\text{CDCl}_3$  at 101, 125 or 150 MHz. Chemical shifts ( $\delta$ ) are expressed in ppm and coupling constants  $J$  are given in Hz. The following abbreviations were used to identify the multiplicities: s = singlet, d = doublet, t = triplet, q = quartet, m = multiplet, dd = doublet of doublets, dt = doublet of triplets, dq = doublet of quartets, br = broad and all combinations thereof can be explained by their integral parts. High resolution mass spectra (HR-MS) were obtained on a TOF-MS instrument with EI or ESI source. Optical rotations were determined using a Rudolph Autopol IV polarimeter. HPLC analyses were performed using Agilent 1200 chromatography or Agilent 1260 chromatography.

## 2. Preparation of Substrates and Photosensitizers.

2-isocyanobiphenyls **1** were synthesized according to the previously reported procedure.<sup>1</sup> All of these compounds are known compounds and their NMR spectra are consistent with the documented data (**1a**<sup>2</sup>, **1b**<sup>1</sup>, **1c**<sup>2</sup>, **1d**<sup>2</sup>, **1e**<sup>2</sup>, **1f**<sup>2</sup>, **1g**<sup>2</sup>, **1h**<sup>3</sup>, **1i**<sup>4</sup>, **1j**<sup>5</sup>, **1k**<sup>6</sup>, **1l**<sup>2</sup>, **1m**<sup>2</sup>, **1n**<sup>7</sup>, **1o**<sup>2</sup>).

---

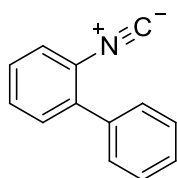

**1a**

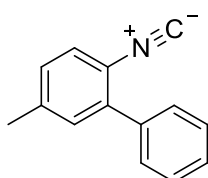

**1b**

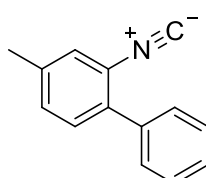

**1c**

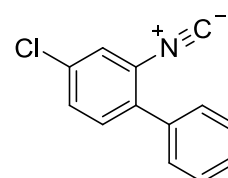

**1d**

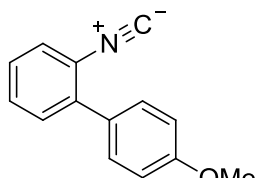

**1e**

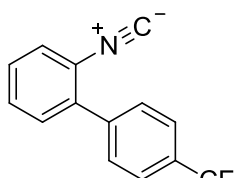

**1f**

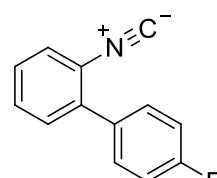

**1g**

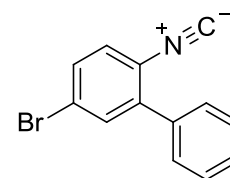

**1h**

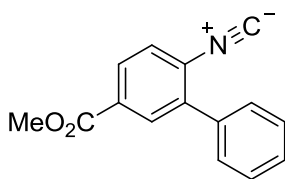

**1i**

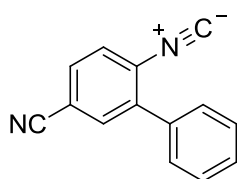

**1j**

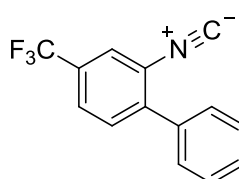

**1k**

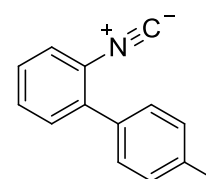

**1l**

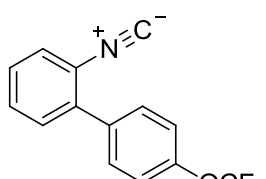

**1m**

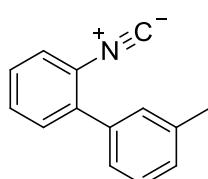

**1n**

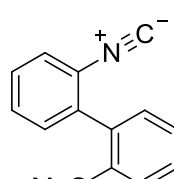

**1o**

---

Aldehydes **2a-2g**, **2j** are commercial available.

**2h**, **2i**, **2k** was prepared via reduction of corresponding Weinreb amide according to the literature<sup>8</sup> and their analytical data are consistent with the documented data (**2h**<sup>8</sup>, **2i**<sup>9</sup>, **2k**<sup>10</sup>).

*N*-Boc-L-prolinal (**2l**), *N*-Boc-L-valinal (**2m**), *N*-Boc-L-alaninal (**2n**), *N*-Boc-L-phenylalaninal (**2o**), *tert*-butyl (S)-1-formyl-3-methylbutylcarbamate (**2p**), (S)-*tert*-butyl 3-formylpiperidine-1-carboxylate (**2q**) are commercial available.

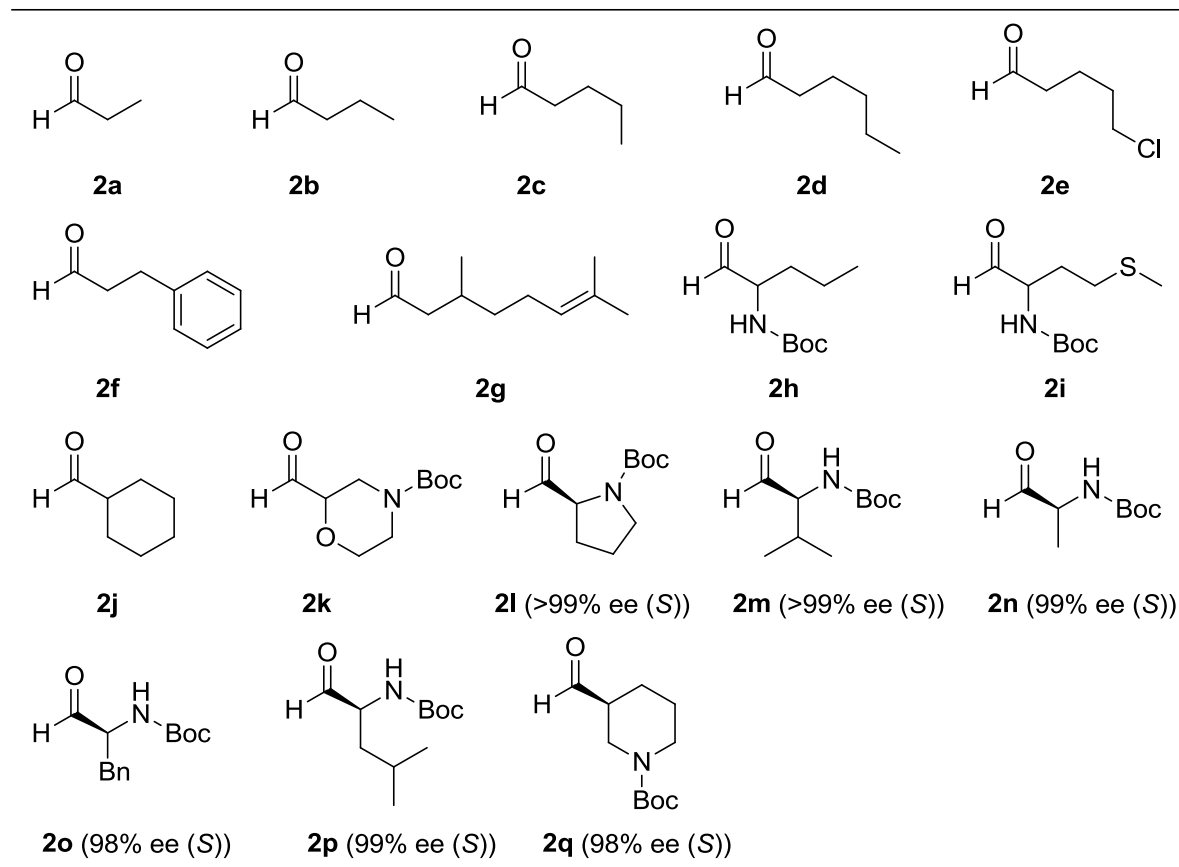

**4CzIPN** was prepared according to the literature and its analytical data are consistent with the documented data.<sup>11</sup>

### 3. General procedures for deoxygenative alkylation/cyclization of 2-biphenylisonitriles with ( $\alpha$ -chiral) alkyl aldehydes

#### 3.1 Optimization of reaction conditions for achiral alkyl aldehydes<sup>[a]</sup>

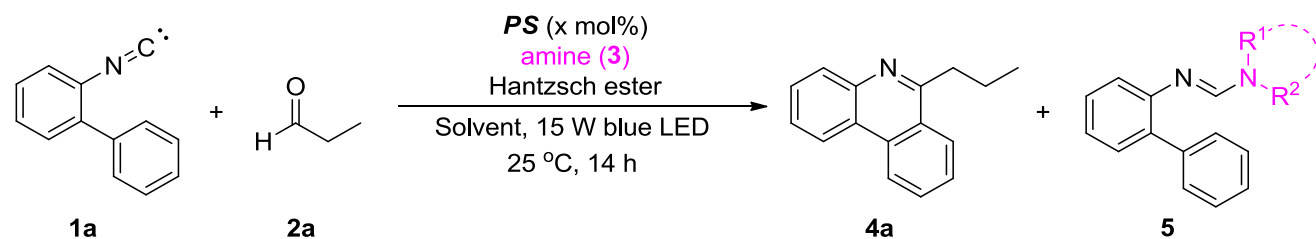

| Entry | PS (x mol%) | Amine (3)         | 1a/2a/3   | Solvent     | Yield (4a/5) <sup>[b]</sup> |
|-------|-------------|-------------------|-----------|-------------|-----------------------------|
| 1     | PS1 (7.5)   | diethylamine (3a) | 1/4.5/4.5 | 1,4-dioxane | 36/12 ( <b>5a</b> )         |
| 2     | PS2 (7.5)   | diethylamine (3a) | 1/4.5/4.5 | 1,4-dioxane | 53/15 ( <b>5a</b> )         |
| 3     | PS3 (7.5)   | diethylamine (3a) | 1/4.5/4.5 | 1,4-dioxane | 65/21 ( <b>5a</b> )         |

|                   |                                            |                                              |                  |                    |                         |
|-------------------|--------------------------------------------|----------------------------------------------|------------------|--------------------|-------------------------|
| 4                 | Ru(bpy) <sub>3</sub> Cl <sub>2</sub> (7.5) | diethylamine ( <b>3a</b> )                   | 1/4.5/4.5        | 1,4-dioxane        | 23/12 ( <b>5a</b> )     |
| 5                 | <i>fac</i> -Ir(ppy) <sub>3</sub> (7.5)     | diethylamine ( <b>3a</b> )                   | 1/4.5/4.5        | 1,4-dioxane        | 20/trace ( <b>5a</b> )  |
| 6                 | <b>PS4</b> (7.5)                           | diethylamine ( <b>3a</b> )                   | 1/4.5/4.5        | 1,4-dioxane        | 0/0 ( <b>5a</b> )       |
| 7                 | <b>PS5</b> (7.5)                           | diethylamine ( <b>3a</b> )                   | 1/4.5/4.5        | 1,4-dioxane        | 53/16 ( <b>5a</b> )     |
| 8                 | Rose begal (7.5)                           | diethylamine ( <b>3a</b> )                   | 1/4.5/4.5        | 1,4-dioxane        | 0/0 ( <b>5a</b> )       |
| 9                 | 4CzIPN (7.5)                               | diethylamine ( <b>3a</b> )                   | 1/4.5/4.5        | 1,4-dioxane        | 75/trace ( <b>5a</b> )  |
| 10                | 4CzIPN (5)                                 | diethylamine ( <b>3a</b> )                   | 1/4.5/4.5        | 1,4-dioxane        | 75/trace ( <b>5a</b> )  |
| 11                | 4CZIPN (2.5)                               | diethylamine ( <b>3a</b> )                   | 1/4.5/4.5        | 1,4-dioxane        | 61/trace ( <b>5a</b> )  |
| <b>12</b>         | <b>4CzIPN (5)</b>                          | <b>dipropylamine (3b)</b>                    | <b>1/4.5/4.5</b> | <b>1,4-dioxane</b> | <b>82/trace (5b)</b>    |
| 13                | 4CzIPN (5)                                 | pyrrolidine ( <b>3c</b> )                    | 1/4.5/4.5        | 1,4-dioxane        | 48/trace ( <b>5c</b> )  |
| 14                | 4CzIPN (5)                                 | piperidine ( <b>3d</b> )                     | 1/4.5/4.5        | 1,4-dioxane        | 81/trace ( <b>5d</b> )  |
| 15                | 4CzIPN (5)                                 | methyl 2-piperidinecarboxylate ( <b>3e</b> ) | 1/4.5/4.5        | 1,4-dioxane        | 81/trace ( <b>5e</b> )  |
| 16                | 4CzIPN (5)                                 | hexamethylenimine ( <b>3f</b> )              | 1/4.5/4.5        | 1,4-dioxane        | 59/trace ( <b>5f</b> )  |
| 20                | 4CzIPN (5)                                 | dipropylamine ( <b>3b</b> )                  | 1/3/3            | 1,4-dioxane        | 72/trace ( <b>5a</b> )  |
| 21                | 4CzIPN (5)                                 | dipropylamine ( <b>3b</b> )                  | 1/1.5/1.5        | 1,4-dioxane        | 44/trace ( <b>5a</b> )  |
| 22                | 4CzIPN (5)                                 | dipropylamine ( <b>3b</b> )                  | 1/4.5/4.5        | THF                | 70/trace ( <b>5a</b> )  |
| 23                | 4CzIPN (5)                                 | dipropylamine ( <b>3b</b> )                  | 1/4.5/4.5        | EA                 | 74/trace ( <b>5a</b> )  |
| 24 <sup>[c]</sup> | 4CzIPN (5)                                 | dipropylamine ( <b>3b</b> )                  | 1/4.5/4.5        | 1,4-dioxane        | 0/0 ( <b>5b</b> )       |
| 24                | --                                         | dipropylamine ( <b>3b</b> )                  | 1/4.5/4.5        | 1,4-dioxane        | 0/0 ( <b>5b</b> )       |
| 25                | 4CzIPN (5)                                 | --                                           | 1/4.5/--         | 1,4-dioxane        | 0/0 ( <b>5b</b> )       |
| 26 <sup>[d]</sup> | 4CzIPN (5)                                 | dipropylamine ( <b>3b</b> )                  | 1/4.5/4.5        | 1,4-dioxane        | 61/ trace ( <b>5b</b> ) |

[a] Reaction condition: **1a** (0.2 mmol), **PS** (x mol %), Hantzsch ester (0.24 mmol), propionaldehyde **2a** (0.9 mmol), amine **3** (0.9 mmol) in solvent (5.0 mL), irradiated with 15 W blue LED at 25 °C under nitrogen atmosphere for 14 h unless otherwise noted. [b] Isolated yield. [c] The reaction was carried out in the dark condition. [d] Hantzsch ester (0.5 equiv. based on **1a**) was used.

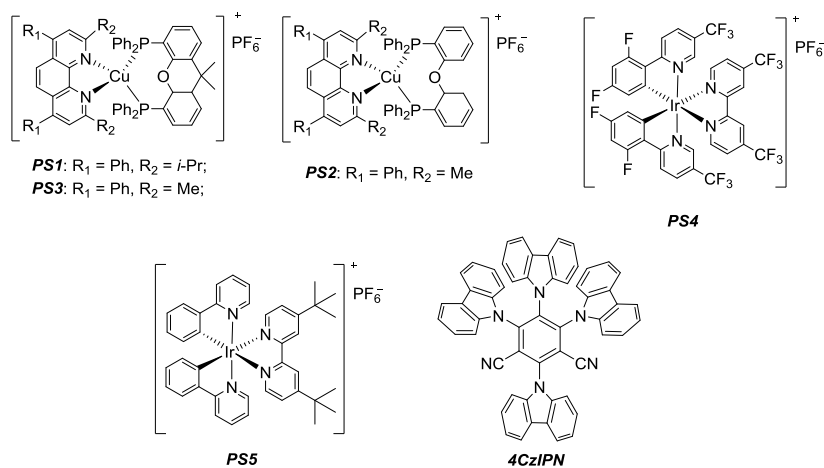

### 3.2 Optimization of reaction conditions for acyclic $\alpha$ -chiral amino aldehyde.<sup>[a]</sup>

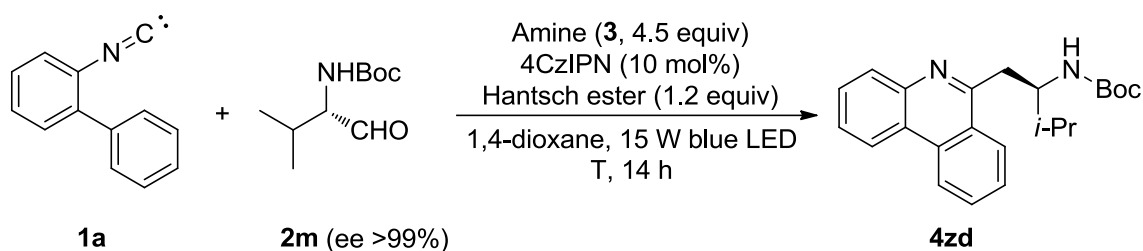

| Entry             | Amine (3)                                     | Temperature (°C) | Yield (%) <sup>b</sup> | ee (%) <sup>[c]</sup> |
|-------------------|-----------------------------------------------|------------------|------------------------|-----------------------|
| 1                 | pyrrolidine ( <b>3c</b> )                     | 35               | 30                     | 12                    |
| 2                 | piperidine ( <b>3d</b> )                      | 35               | 72                     | 46                    |
| 3                 | methyl piperidine-2-carboxylate ( <b>3e</b> ) | 35               | 71                     | 72                    |
| 4                 | hexamethyleneimine ( <b>3f</b> )              | 35               | 63                     | <10                   |
| 5                 | methyl <i>L</i> -prolinate ( <b>3g</b> )      | 35               | 85                     | 74                    |
| 6                 | dicyclohexylamine ( <b>3h</b> )               | 35               | 63                     | <10                   |
| 7                 | dibenzylamine ( <b>3i</b> )                   | 35               | 27                     | 29                    |
| 8                 | methyl <i>L</i> -prolinate ( <b>3g</b> )      | 25               | 83                     | 90                    |
| 9                 | <b>methyl <i>L</i>-prolinate (3g)</b>         | <b>15</b>        | <b>83</b>              | <b>96</b>             |
| 10                | --                                            | 15               | 0                      | --                    |
| 11 <sup>[d]</sup> | methyl <i>L</i> -prolinate ( <b>3g</b> )      | 15               | 73                     | 96                    |

[a] Reaction condition: **1a** (0.2 mmol), 4CzIPN (10 mmol%), amine **3** (0.9 mmol), *tert*-butyl (*S*)-(3-methyl-1-oxobutan-2-yl)carbamate **2m** (0.9 mmol), Hantzsch ester (0.24 mmol) in 1,4-dioxane (5.0 mL), irradiated with 15 W blue LED under nitrogen atmosphere for 14 h unless otherwise noted. [b] Isolated yield. [c] The *ee* value was determined by HPLC analysis. [d] Without Hantzsch ester.

### 3.3 Experimental details and characterization of products 4

#### General procedure for the synthesis of 6-alkyl phenanthridine derivatives 4.

To a 25 mL flame-dried Schlenk tube was added **1** (0.3 mmol), 4CzIPN (0.015 mmol for achiral alkyl aldehydes or 0.03 mmol for chiral alkyl aldehydes) and Hantzsch ester (91.2 mg, 0.36 mmol). The tube was evacuated and refilled with N<sub>2</sub> for three times. A solution of aldehyde **2** (1.35 mmol), amine **3** (1.35 mmol) in 1,4-dioxane (7.5 mL) was added under nitrogen atmosphere. The reaction mixture was irradiated at a distance of 3 cm from 15 W blue LED and stirred at 25 °C ( for **4zd-4zg**, at 15 °C) 14 h. Upon completion, the reaction mixture was concentrated under vacuum and the residue was purified by column chromatography on silica gel (200-300 mesh), eluting with the indicated

mixture of ethyl acetate (EA)/petroleum ether (PE) or DCM to give pure 6-alkyl phenanthridine **4**.

### Reaction Setup:

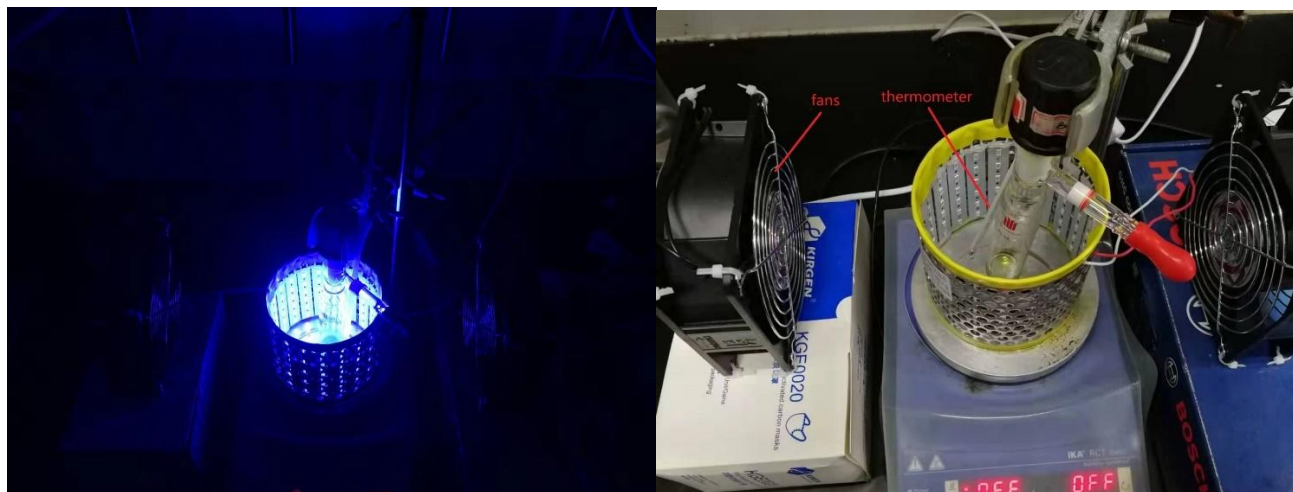

15 W blue LED strips come with an adhesive back, so they may be easily adhered to the inside of a meshy cask. The Schlenk tube was placed in the center. Two fans were used to control the reaction temperature at room temperature. Meanwhile a thermometer was equipped to monitor the reaction temperature.

### Characterization of products **4**

#### 6-propylphenanthridine (**4a**)

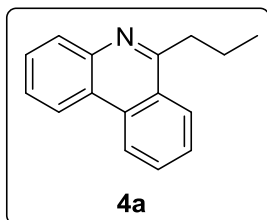

**4a** was isolated via column chromatography (eluent: PE/EA = 100/1 to PE/EA = 20/1) as a colorless liquid (55.8 mg, 84%).  $^1\text{H}$  NMR (500 M,  $\text{CDCl}_3$ ):  $\delta$  8.67 (d,  $J$  = 8.3 Hz, 1H), 8.56 (d,  $J$  = 8.2 Hz, 1H), 8.28 (d,  $J$  = 8.2 Hz, 1H), 8.14 (dd,  $J$  = 8.2, 1.0 Hz, 1H), 7.85 (ddd,  $J$  = 8.3, 7.0, 1.2 Hz, 1H), 7.72 (dddd,  $J$  = 9.2, 8.2, 7.0, 1.3 Hz, 2H), 7.64 (ddd,  $J$  = 8.2, 7.1, 1.3 Hz, 1H), 3.40-3.31 (m, 2H), 1.99 (dq,  $J$  = 15.0, 7.4 Hz, 2H), 1.15 (t,  $J$  = 7.4 Hz, 3H);  $^{13}\text{C}$  NMR ( $\text{CDCl}_3$ , 125 MHz):  $\delta$  162.3, 143.7, 132.9, 130.2, 129.6, 128.6, 127.2, 126.34, 126.25, 125.3, 123.6, 122.5, 121.9, 38.3, 22.9, 14.4. Its analytical data are consistent with the documented data.<sup>12</sup>

#### 2-methyl-6-propylphenanthridine (**4b**)

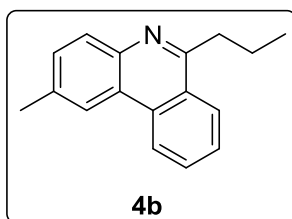

**4b** was isolated via column chromatography (eluent: PE/EA = 100/1 to PE/EA = 20/1) as a colorless liquid (50.8 mg, 72%).  $^1\text{H}$  NMR ( $\text{CDCl}_3$ , 600 MHz):  $\delta$  8.64 (d,  $J$  = 8.3 Hz, 1H), 8.34 (s, 1H), 8.25 (d,  $J$  = 8.2 Hz, 1H), 8.04 (d,  $J$  = 8.3 Hz, 1H), 7.82 (t,  $J$  = 7.6 Hz, 1H), 7.69 (t,  $J$  = 7.5 Hz, 1H), 7.55 (d,  $J$  = 8.3 Hz, 1H), 3.44-3.24 (m, 2H), 2.63 (s, 3H), 1.98 (dq,  $J$  = 14.9, 7.3 Hz, 2H), 1.15 (t,  $J$  = 7.3 Hz, 3H);  $^{13}\text{C}$  NMR ( $\text{CDCl}_3$ , 150 MHz):  $\delta$  161.3, 142.1, 136.0, 132.7, 130.2, 130.0,



129.3, 127.0, 126.3, 125.3, 123.5, 122.4, 121.6, 38.3, 23.0, 21.9, 14.4. HRMS (ESI) for  $C_{17}H_{18}N$   $[M+H]^+$ : calcd 236.1434, found 236.1486.

### 3-methyl-6-propylphenanthridine (4c):

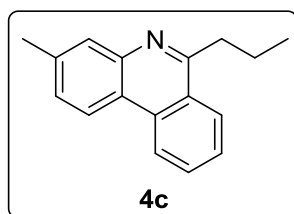

4c was isolated via column chromatography (eluent: PE/EA = 100/1 to PE/EA = 20/1) as a colorless liquid (45.0 mg, 64%).  $^1H$  NMR ( $CDCl_3$ , 500 MHz):  $\delta$  8.56 (d,  $J = 8.3$  Hz, 1H), 8.41 (d,  $J = 8.4$  Hz, 1H), 8.24 (d,  $J = 8.2$  Hz, 1H), 7.95 (s, 1H), 7.80 (t,  $J = 7.2$  Hz, 1H), 7.65 (t,  $J = 7.2$  Hz, 1H), 7.44 (dd,  $J = 8.3, 1.3$  Hz, 1H), 3.36-3.33 (m, 2H), 2.59 (s, 3H), 2.01-1.94 (m, 2H),

1.15 (t,  $J = 7.4$  Hz);  $^{13}C$  NMR ( $CDCl_3$ , 125 MHz):  $\delta$  162.2, 143.8, 138.6, 133.0, 130.1, 129.2, 127.9, 126.7, 126.3, 125.0, 122.2, 121.7, 121.3, 38.3, 22.9, 21.5, 14.4. HRMS (ESI) for  $C_{17}H_{18}N$   $[M+H]^+$ : calcd 236.1434, found 236.1495.

### 3-chloro-6-propylphenanthridine (4d)

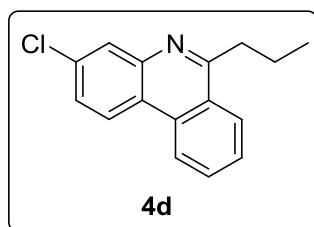

4d was isolated via column chromatography (eluent: PE/EA = 100/1 to PE/EA = 20/1) as a colorless liquid (48.3 mg, 63%).  $^1H$  NMR ( $CDCl_3$ , 600 MHz):  $\delta$  8.57 (d,  $J = 8.3$  Hz, 1H), 8.45 (d,  $J = 8.7$  Hz, 1H), 8.26 (d,  $J = 8.2$  Hz, 1H), 8.13 (s, 1H), 7.85 (t,  $J = 7.6$  Hz, 1H), 7.72 (t,  $J = 7.6$  Hz, 1H), 7.57 (d,  $J = 8.7$  Hz, 1H), 3.41-3.24 (m, 2H), 2.05-1.86 (m, 2H), 1.14 (t,  $J = 7.3$

Hz, 3H);  $^{13}C$  NMR ( $CDCl_3$ , 150 MHz):  $\delta$  163.6, 144.5, 134.1, 132.5, 130.6, 128.9, 127.5, 126.8, 126.4, 125.2, 123.3, 122.4, 122.1, 38.2, 22.6, 14.4. HRMS (ESI) for  $C_{16}H_{15}ClN$   $[M+H]^+$ : calcd 256.0888, found 256.0916.

### 8-methoxy-6-propylphenanthridine (4e)

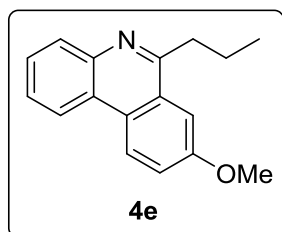

4e was isolated via column chromatography (eluent: PE/EA = 100/1 to PE/EA = 20/1) as a white solid (53.5 mg, 71%).  $^1H$  NMR ( $CDCl_3$ , 600 MHz):  $\delta$  8.57 (d,  $J = 9.0$  Hz, 1H), 8.47 (d,  $J = 8.1$  Hz, 1H), 8.12 (d,  $J = 8.1$  Hz, 1H), 7.67 (t,  $J = 7.5$  Hz, 1H), 7.60 (dd,  $J = 14.0, 5.0$  Hz, 2H), 7.48 (dd,  $J = 8.9, 1.9$  Hz, 1H), 4.02 (s, 3H), 3.47-3.20 (m, 2H), 2.29-1.92 (m, 2H), 1.15 (t,  $J = 7.3$  Hz, 3H);

$^{13}C$  NMR ( $CDCl_3$ , 150 MHz):  $\delta$  161.3, 158.6, 142.9, 129.6, 127.6, 127.3, 126.6, 126.3, 124.2, 123.7, 121.4, 120.3, 107.0, 55.5, 38.4, 22.5, 14.5. Its analytical data are consistent with the documented data.<sup>13</sup>

### 6-propyl-8-(trifluoromethyl)phenanthridine (4f)

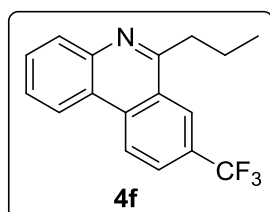

4f was isolated via column chromatography (eluent: PE/EA = 100/1 to PE/EA = 20/1) as yellow liquid (43.4 mg, 50%).  $^1H$  NMR ( $CDCl_3$ , 600 MHz):  $\delta$  8.75 (d,  $J = 8.6$  Hz, 1H), 8.56 (d,  $J = 8.1$  Hz, 1H), 8.52 (s, 1H), 8.18 (d,  $J = 8.1$  Hz, 1H), 8.03 (d,  $J = 8.6$  Hz, 1H), 7.80 (t,  $J = 7.5$  Hz, 1H), 7.69 (t,  $J = 7.5$  Hz, 1H), 3.39 (t,  $J = 7.7$  Hz, 2H), 2.12-1.92 (m, 2H), 1.16 (t,  $J = 7.1$  Hz, 3H);  $^{13}C$  NMR

( $CDCl_3$ , 150 MHz):  $\delta$  161.9, 144.5, 135.2, 129.9, 129.8, 129.0 (q,  $J = 32.8$  Hz), 126.9, 126.1 (q,  $J =$

3.0 Hz), 124.7, 124.1 (q,  $J = 270.0$  Hz), 123.7 (q,  $J = 4.2$  Hz), 123.6, 122.7, 122.3, 38.0, 22.6, 14.3. HRMS (ESI) for  $C_{17}H_{15}F_3N$   $[M+H]^+$ : calcd 290.1151, found 290.1218.

#### 8-fluoro-6-propylphenanthridine (4g)

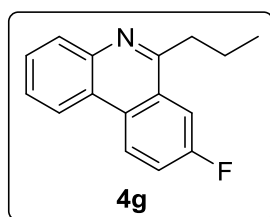

**4g** was isolated via column chromatography (eluent: PE/EA = 100/1 to PE/EA = 20/1) as colorless liquid (41.6 mg, 58%).  $^1H$  NMR ( $CDCl_3$ , 500 MHz):  $\delta$  8.64 (dd,  $J = 9.1, 5.4$  Hz, 1H), 8.49 (d,  $J = 8.0$  Hz, 1H), 8.15-8.13 (m, 1H), 7.88-7.86 (m, 1H), 7.73-7.70 (m, 1H), 7.65-7.56 (m, 3H), 3.32-3.28 (m, 2H), 2.01-1.94 (m, 2H), 1.14 (t,  $J = 7.3$  Hz);  $^{13}C$  NMR ( $CDCl_3$ , 125 MHz):  $\delta$  161.4

(d,  $J = 246.6$  Hz), 161.3 (d,  $J = 3.5$  Hz), 143.4, 129.7, 129.6, 128.5, 126.7, 126.6, 125.0 (d,  $J = 8.7$  Hz), 123.2, 121.7, 119.4 (d,  $J = 23.7$  Hz), 110.9 (d,  $J = 21.0$  Hz), 38.3, 22.6, 14.4. HRMS (ESI) for  $C_{16}H_{15}FN$   $[M+H]^+$ : calcd 240.1183, found 240.1252.

#### 6-butylphenanthridine (4h)

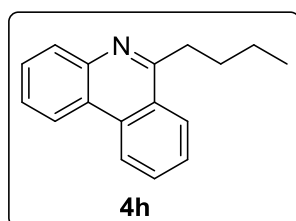

**4h** was isolated via column chromatography (eluent: PE/EA = 100/1 to PE/EA = 20/1) as colorless liquid (56.5 mg, 80%).  $^1H$  NMR ( $CDCl_3$ , 500 MHz):  $\delta$  8.66 (d,  $J = 8.2$  Hz, 1H), 8.56 (d,  $J = 8.2$  Hz, 1H), 8.28 (d,  $J = 8.2$  Hz, 1H), 8.14 (d,  $J = 9.0$  Hz, 1H), 7.85 (t,  $J = 7.6$  Hz, 1H), 7.72 (q,  $J = 8.4$  Hz, 2H), 7.63 (t,  $J = 8.2$  Hz, 1H), 3.45-3.22 (m, 2H), 2.00-1.87 (m, 2H), 1.66-

1.53 (m, 2H), 1.03 (t,  $J = 7.4$  Hz, 3H);  $^{13}C$  NMR ( $CDCl_3$ , 125 MHz):  $\delta$  162.5, 143.8, 133.0, 130.3, 129.5, 128.6, 127.2, 126.4, 126.3, 125.3, 123.7, 122.5, 121.9, 36.2, 31.8, 23.1, 14.0. Its analytical data are consistent with the documented data.<sup>14</sup>

#### 6-pentylphenanthridine (4i)

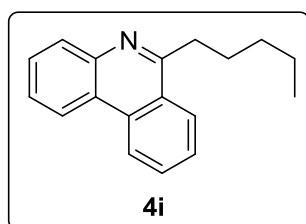

**4i** was isolated via column chromatography (eluent: PE/EA = 100/1 to PE/EA = 20/1) as colorless liquid (57.6 mg, 77%).  $^1H$  NMR ( $CDCl_3$ , 600 MHz):  $\delta$  8.63 (d,  $J = 8.2$  Hz, 1H), 8.54 (d,  $J = 8.1$  Hz, 1H), 8.26 (d,  $J = 8.2$  Hz, 1H), 8.16 (d,  $J = 8.1$  Hz, 1H), 7.82 (t,  $J = 7.5$  Hz, 1H), 7.73 (t,  $J = 7.6$  Hz, 1H), 7.69 (t,  $J = 7.6$  Hz, 1H), 7.62 (t,  $J = 7.5$  Hz, 1H), 3.46-3.25 (m,

2H), 1.96 (dt,  $J = 15.7, 7.8$  Hz, 2H), 1.55 (dt,  $J = 15.1, 7.5$  Hz, 2H), 1.49-1.39 (m, 2H), 0.96 (t,  $J = 7.3$  Hz, 3H);  $^{13}C$  NMR ( $CDCl_3$ , 150 MHz):  $\delta$  162.5, 143.8, 133.0, 130.2, 129.6, 128.6, 127.2, 126.3, 126.2, 125.3, 123.7, 122.5, 121.9, 36.5, 32.2, 29.4, 22.6, 14.1. Its analytical data are consistent with the documented data.<sup>15</sup>

#### 6-hexylphenanthridine (4j)

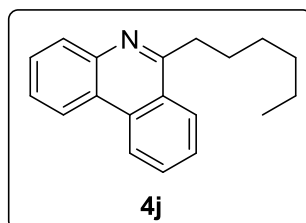

**4j** was isolated via column chromatography (eluent: PE/EA = 100/1 to PE/EA = 20/1) as colorless liquid (67.2 mg, 85%).  $^1H$  NMR ( $CDCl_3$ , 600 MHz):  $\delta$  8.65 (d,  $J = 8.2$  Hz, 1H), 8.55 (d,  $J = 8.1$  Hz, 1H), 8.27 (d,  $J = 8.2$  Hz, 1H), 8.16 (d,  $J = 8.1$  Hz, 1H), 7.83 (t,  $J = 7.6$  Hz, 1H), 7.76-7.68 (m,

2H), 7.63 (t,  $J = 7.5$  Hz, 1H), 3.39 (t,  $J = 6.5$  Hz, 2H), 1.99-1.90 (m, 2H), 1.62-1.52 (m, 2H), 1.46-1.31 (m, 4H), 0.93 (t,  $J = 7.0$  Hz, 3H);  $^{13}\text{C}$  NMR ( $\text{CDCl}_3$ , 150 MHz):  $\delta$  162.5, 143.8, 133.0, 130.2, 129.6, 128.6, 127.2, 126.4, 126.2, 125.3, 123.7, 122.5, 121.9, 36.5, 31.8, 29.7, 29.6, 22.7, 14.1. Its analytical data are consistent with the documented data.<sup>16</sup>

#### 6-(5-chloropentyl)phenanthridine (4k)

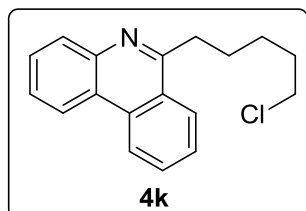

**4k** was isolated via column chromatography (eluent: PE/EA = 100/1 to PE/EA = 20/1) as Colorless liquid (67.3 mg, 79%).  $^1\text{H}$  NMR ( $\text{CDCl}_3$ , 600 MHz):  $\delta$  8.65 (d,  $J = 8.2$  Hz, 1H), 8.55 (d,  $J = 8.1$  Hz, 1H), 8.24 (d,  $J = 8.2$  Hz, 1H), 8.15 (d,  $J = 8.1$  Hz, 1H), 7.84 (t,  $J = 7.6$  Hz, 1H), 7.76-7.67 (m, 2H), 7.64 (t,  $J = 7.5$  Hz, 1H), 3.59 (t,  $J = 6.7$  Hz, 2H), 3.46-3.33 (m, 2H), 2.05-1.95 (m, 2H), 1.95-1.86 (m, 2H), 1.75-1.64 (m, 2H);  $^{13}\text{C}$  NMR ( $\text{CDCl}_3$ , 150 MHz):  $\delta$  161.8, 143.7, 133.0, 130.3, 129.6, 128.6, 127.3, 126.4, 126.1, 125.2, 123.7, 122.5, 121.9, 45.0, 36.0, 32.6, 28.5, 27.2. HRMS (ESI) for  $\text{C}_{18}\text{H}_{19}\text{ClN}$   $[\text{M}+\text{H}]^+$ : calcd 284.1201, found 284.1240.

#### 6-(3-phenylpropyl)phenanthridine (4l)

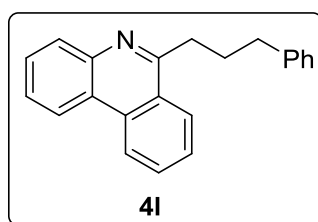

**4l** was isolated via column chromatography (eluent: PE/EA = 100/1 to PE/EA = 20/1) as colorless liquid (62.5 mg, 70%).  $^1\text{H}$  NMR ( $\text{CDCl}_3$ , 500 MHz):  $\delta$  8.65 (d,  $J = 8.3$  Hz, 1H), 8.56 (d,  $J = 8.0$  Hz, 1H), 8.15 (t,  $J = 8.7$  Hz, 2H), 7.89-7.79 (m, 1H), 7.76-7.71 (m, 1H), 7.70-7.60 (m, 2H), 7.38-7.28 (m, 4H), 7.23 (t,  $J = 7.1$  Hz, 1H), 3.49-3.35 (m, 2H), 2.89 (t,  $J = 7.7$  Hz, 2H), 2.38-2.26 (m, 2H);  $^{13}\text{C}$  NMR ( $\text{CDCl}_3$ , 125 MHz):  $\delta$  161.8, 143.7, 142.1, 132.9, 130.3, 129.6, 128.6, 128.4, 127.2, 126.3, 126.2, 125.9, 125.2, 123.7, 122.5, 121.9, 36.0, 35.6, 30.8. Its analytical data are consistent with the documented data.<sup>17</sup>

#### 6-(3,7-dimethyloct-6-en-1-yl)phenanthridine (4m)

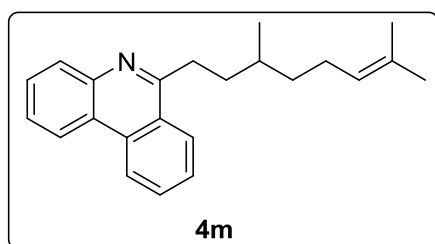

**4m** was isolated via column chromatography (eluent: PE/EA = 100/1 to PE/EA = 20/1) as colorless liquid (53.3 mg, 56%).  $^1\text{H}$  NMR ( $\text{CDCl}_3$ , 500 MHz):  $\delta$  8.66 (d,  $J = 8.2$  Hz, 1H), 8.56 (d,  $J = 8.2$  Hz, 1H), 8.26 (d,  $J = 8.1$  Hz, 1H), 8.14 (dd,  $J = 8.2, 1.0$  Hz, 1H), 7.85 (ddd,  $J = 8.2, 7.1, 1.2$  Hz, 1H), 7.72 (qd,  $J = 6.9, 1.2$  Hz, 2H), 7.63 (ddd,  $J = 8.2, 7.1, 1.3$  Hz, 1H), 5.25-5.02 (m, 1H), 3.53-3.25 (m, 2H), 2.15-1.89 (m, 3H), 1.81-1.67 (m, 5H), 1.62 (s, 3H), 1.57-1.46 (m, 1H), 1.37-1.22 (m, 1H), 1.09 (d,  $J = 6.5$  Hz, 3H);  $^{13}\text{C}$  NMR ( $\text{CDCl}_3$ , 125 MHz):  $\delta$  162.8, 143.8, 133.0, 131.2, 130.3, 129.6, 128.6, 127.2, 126.33, 126.25, 125.2, 124.9, 123.7, 122.5, 121.9, 37.1, 36.7, 34.3, 33.1, 25.7, 25.6, 19.6, 17.7. HRMS (ESI) for  $\text{C}_{23}\text{H}_{28}\text{N}$   $[\text{M}+\text{H}]^+$ : calcd 318.2216, found 318.2259.

#### tert-butyl (1-(phenanthridin-6-yl)pentan-2-yl)carbamate (4n)

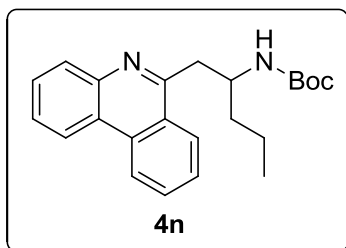

**4n** was isolated via column chromatography (eluent: DCM to PE/EA = 5/1) as white solid (92.8 mg, 85%). Mp: 125-127°C. <sup>1</sup>H NMR (500 MHz, CDCl<sub>3</sub>): δ 8.64 (d, *J* = 8.5 Hz, 1H), 8.55 (d, *J* = 7.5 Hz, 1H), 8.40 (d, *J* = 8 Hz, 1H), 8.14-8.12 (d, 1H), 7.85-7.82 (m, 1H), 7.74-7.70 (m, 2H), 7.65-7.62 (m, 1H), 5.27 (d, *J* = 7.5 Hz, 1H), 4.25 (d, *J* = 6.5 Hz, 1H), 3.63-3.59 (m, 1H), 3.51-3.46 (m, 1H), 1.67-1.61 (m, 2H), 1.54-1.47 (s, 2H), 1.34 (m, 9H), 0.89 (t, *J* = 7.0 Hz, 3H); <sup>13</sup>C NMR (125 MHz, CDCl<sub>3</sub>): δ 159.2, 155.7, 143.4, 132.8, 130.4, 129.7, 128.5, 127.5, 126.5, 126.3, 125.7, 123.7, 122.4, 121.9, 78.8, 50.4, 40.9, 37.0, 28.3, 19.5, 14.0. HRMS (ESI) for C<sub>23</sub>H<sub>29</sub>N<sub>2</sub>O<sub>2</sub> [M+H]<sup>+</sup>: calcd 365.2224, found 365.2227.

**tert-butyl (4-(methylthio)-1-(phenanthridin-6-yl)butan-2-yl)carbamate (4o)**

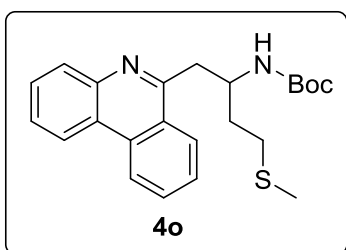

**4o** was isolated via column chromatography (eluent: DCM to PE/EA = 5/1) as white solid (73.7 mg, 62%). Mp: 117-119 °C. <sup>1</sup>H NMR (500 MHz, CDCl<sub>3</sub>): δ 8.65 (d, *J* = 8 Hz, 1H), 8.56 (d, *J* = 8 Hz, 1H), 8.37 (d, *J* = 7.5 Hz, 1H), 8.12 (d, *J* = 7.5 Hz, 1H), 7.86 (t, *J* = 7 Hz, 1H), 7.75-7.71 (m, 2H), 7.66-7.63 (m, 1H), 5.46 (d, *J* = 7 Hz, 1H), 4.42-4.35 (m, 1H), 3.66-3.53 (m, 2H), 2.70-2.55 (m, 2H), 2.06 (s, 3H), 2.02-1.97 (m, 2), 1.35 (s, 9H); <sup>13</sup>C NMR (125 MHz, CDCl<sub>3</sub>): δ 158.7, 155.6, 143.3, 132.9, 130.6, 129.7, 128.6, 127.62, 127.61, 126.6, 126.2, 125.7, 123.7, 122.5, 122.0, 79.1, 49.8, 40.2, 34.2, 31.0, 28.3, 15.5. HRMS (ESI) for C<sub>23</sub>H<sub>29</sub>N<sub>2</sub>O<sub>2</sub>S [M+H]<sup>+</sup>: calcd 397.1944, found 397.1946.

**6-(cyclohexylmethyl)phenanthridine (4p)**

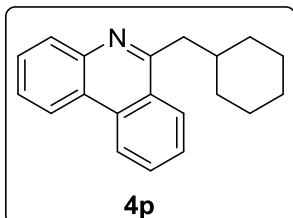

**4p** was isolated via column chromatography (eluent: PE/EA = 100/1 to PE/EA = 20/1) as colorless liquid (56.2 mg, 68%). <sup>1</sup>H NMR (CDCl<sub>3</sub>, 600 MHz): δ 8.67 (d, *J* = 8.3 Hz, 1H), 8.57 (d, *J* = 8.1 Hz, 1H), 8.29 (d, *J* = 8.2 Hz, 1H), 8.17 (d, *J* = 8.1 Hz, 1H), 7.85 (t, *J* = 7.6 Hz, 1H), 7.77-7.69 (m, 2H), 7.64 (t, *J* = 7.5 Hz, 1H), 3.29 (d, *J* = 7.2 Hz, 2H), 2.04 (s, 1H), 1.72 (m, 5H), 1.22 (s, 5H); <sup>13</sup>C NMR (CDCl<sub>3</sub>, 150 MHz): δ 161.5, 143.7, 132.9, 130.2, 129.6, 128.6, 127.1, 126.7, 126.3, 125.8, 123.6, 122.4, 121.9, 43.7, 38.8, 33.7, 26.5, 26.3. Its analytical data are consistent with the documented data.<sup>18</sup>

**tert-butyl 2-(phenanthridin-6-ylmethyl)morpholine-4-carboxylate (4q)**

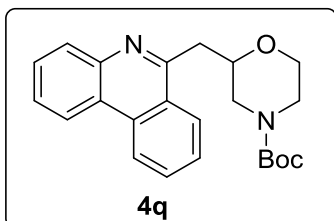

**4q** was isolated via column chromatography (eluent: DCM to PE/EA = 5/1) as colorless liquid (61.2 mg, 54%). <sup>1</sup>H NMR (500 MHz, CDCl<sub>3</sub>): δ 8.66 (d, *J* = 8.0 Hz, 1H), 8.57 (d, *J* = 8.0 Hz, 1H), 8.30 (d, *J* = 8.0 Hz, 1H), 8.16 (d, *J* = 8.5 Hz, 1H), 7.8-7.84 (m, 1H), 7.75-7.71 (m, 2H), 7.67-7.64 (m, 1H), 4.23-4.17 (m, 2H), 3.87 (d, *J* = 10.0 Hz, 2H), 3.71-3.67 (m, 1H), 3.55-3.42 (m, 2H),

3.03-2.87 (m, 2H), 1.44 (s, 9H);  $^{13}\text{C}$  NMR (125 MHz,  $\text{CDCl}_3$ ):  $\delta$  154.7, 143.6, 132.9, 131.4, 130.4, 129.8, 128.6, 127.3, 126.6, 126.4, 125.8, 123.7, 122.4, 121.9, 79.9, 75.2, 66.7, 28.4. HRMS (ESI) for  $\text{C}_{23}\text{H}_{27}\text{N}_2\text{O}_3$   $[\text{M}+\text{H}]^+$ : calcd 379.2016, found 379.2020.

***tert*-butyl (*S*)-2-(phenanthridin-6-ylmethyl)pyrrolidine-1-carboxylate (**4r**)**

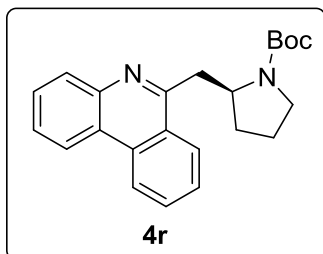

**4r** was isolated via column chromatography (eluent: DCM to PE/EA = 5/1) as colorless liquid (85.4 mg, 79%). Enantiomeric excess was established by HPLC analysis by using a Daicel Chiralpak IG-3 column, *ee* = 97% (HPLC: 254 nm, *n*-Hexane/isopropanol = 90/10, flow rate 0.5 mL/min, 30 °C,  $t_r$  (major) = 10.69 min,  $t_r$  (minor) = 8.97 min).  $[\alpha]_D^{25} = +77.1$  (c 1.0,  $\text{CH}_2\text{Cl}_2$ ).  $^1\text{H}$  NMR (500 MHz,  $\text{CDCl}_3$ ):  $\delta$  {8.80 (d,  $J = 7.8$  Hz) + 8.50 (d,  $J = 7.8$  Hz)}, 8.67-8.62 (m, 1H), 8.56 (d,  $J = 8.0$  Hz, 1H), 8.14 (d,  $J = 8.0$  Hz, 1H), 7.85-7.63 (m, 4H), 4.49-4.45 (m, 1H), {4.19 (d,  $J = 11.0$  Hz, 0.5H) + 3.99 (dd,  $J = 12.8$  Hz,  $J_2 = 3.6$  Hz, 0.5 H)}, 3.51-3.32 (m, 2H), 3.18-3.09 (m, 1H), 2.09-1.67 (m, 4H), {1.54 (s, 4.5H) + 1.50 (s, 4.5 H)};  $^{13}\text{C}$  NMR (125 MHz,  $\text{CDCl}_3$ )  $\delta$  159.9 & 159.4 (due to rotamer), 154.8 & 154.5 (due to rotamer), 143.8 & 143.7 (due to rotamer), 132.9 & 132.7 (due to rotamer), 130.4, 129.8 & 129.7 (due to rotamer), 128.6 & 128.4 (due to rotamer), 127.84 & 127.82 (due to rotamer), 127.5 & 127.4 (due to rotamer), 127.2 & 127.1 (due to rotamer), 126.7 & 126.6 (due to rotamer), 126.6 & 126.5 (due to rotamer), 125.8 & 125.6 (due to rotamer), 122.4 & 122.0 (due to rotamer), 121.9, 79.8 & 79.1 (due to rotamer), 57.1 & 56.9 (due to rotamer), 46.9 & 46.5 (due to rotamer), 41.2 & 40.4 (due to rotamer), 30.0 & 28.9 (due to rotamer), 28.7, 23.5 & 22.7 (due to rotamer). HRMS (ESI) for  $\text{C}_{23}\text{H}_{26}\text{N}_2\text{O}_2$   $[\text{M}+\text{H}]^+$ : calcd 363.2067, found 363.2069. Its analytical data are consistent with the documented data.<sup>19</sup>

Chiral HPLC Charts for **4r**:

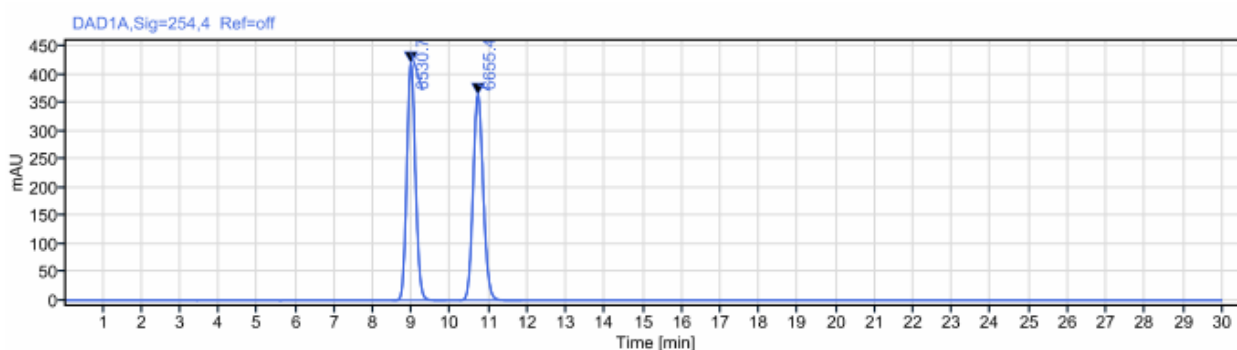

| Signal: DAD1A, Sig=254.4 Ref=off |      |             |          |        |         |      |
|----------------------------------|------|-------------|----------|--------|---------|------|
| RT [min]                         | Type | Width [min] | Area     | Height | Area%   | Name |
| 8.972                            | BB   | 1.39        | 6530.703 | 420.19 | 49.5273 |      |
| 10.709                           | VBA  | 1.60        | 6655.374 | 364.26 | 50.4727 |      |

**Figure S1.** The HPLC chart of rac-**4r**

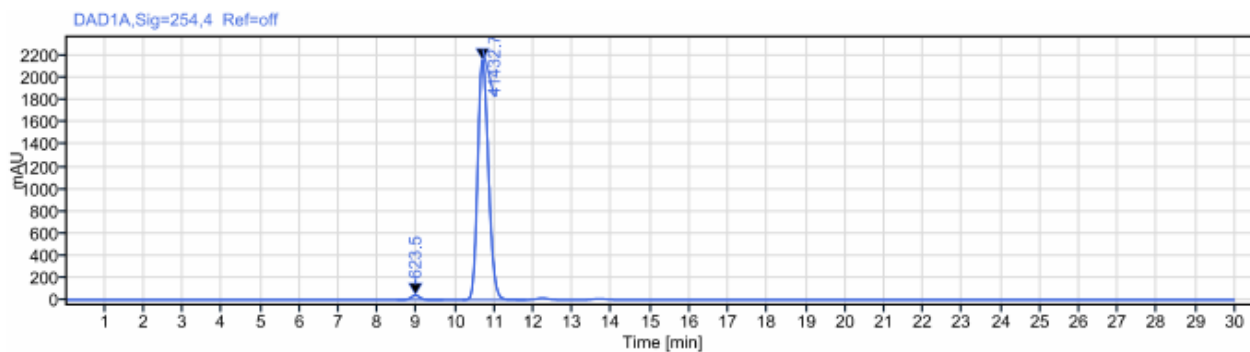

Signal: DAD1A,Sig=254,4 Ref=off

| RT [min] | Type | Width [min] | Area      | Height  | Area%   | Name |
|----------|------|-------------|-----------|---------|---------|------|
| 8.968    | BB   | 1.18        | 623.450   | 40.57   | 1.4824  |      |
| 10.691   | VB   | 1.62        | 41432.673 | 2161.85 | 98.5176 |      |

**Figure S2.** The HPLC chart of **4r**

Note: at RT, this compound appears as a mixture of rotamers. This phenomenon was widely observed in the *N*-Boc pyrrolidine derivatives.<sup>19,20</sup> And this phenomenon was disappeared when the protecting group (Boc) was removed. The NMR spectra of *de*-Boc-**4r** was listed as blow.

**(S)-6-(pyrrolidin-2-ylmethyl)phenanthridine (*de*-Boc-**4r**)**

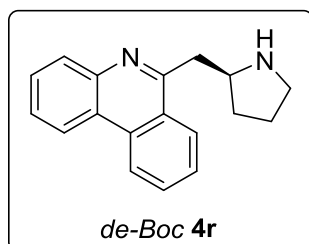

<sup>1</sup>H NMR (500 MHz, CDCl<sub>3</sub>): δ 8.36 (d, *J* = 8.4 Hz, 1H), 8.24 (d, *J* = 8.4 Hz, 1H), 8.04 (d, *J* = 6.8 Hz, 1H), 7.93 (d, *J* = 8.0 Hz, 1H), 7.68 (t, *J* = 7.60 Hz, 1H), 7.59-7.50 (m, 2H), 7.46-7.42 (m, 1H), 4.31-4.23 (m, 1H), 3.81-3.75 (m, 1H), 3.57-3.51 (m, 1H), 3.34-3.29 (m, 2H), 2.21-2.17 (m, 1H), 2.05-1.86 (m, 3H); <sup>13</sup>C NMR (125 MHz, CDCl<sub>3</sub>) δ 156.8, 145.6, 132.4, 130.7, 129.6, 128.6, 127.5, 126.8, 125.2, 124.7, 123.4, 122.2, 121.6, 58.2,

44.9, 35.1, 30.1, 23.4.

**tert-butyl (S)-2-((2-methylphenanthridin-6-yl)methyl)pyrrolidine-1-carboxylate (**4s**)**

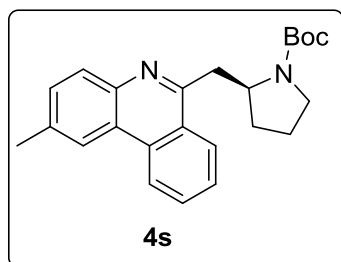

**4s** was isolated via column chromatography (eluent: DCM to PE/EA = 5/1) as colorless liquid (78.9 mg, 70%). Enantiomeric excess was established by HPLC analysis by using a Daicel Chiralpak IG-3 column, *ee* > 99% (HPLC: 210 nm, *n*-Hexane/isopropanol = 90/10, flow rate 0.5 mL/min, 30 °C, *t<sub>r</sub>* (major) = 11.90 min, *t<sub>r</sub>* (minor) = 9.09 min). [α]<sub>D</sub><sup>25</sup> = +48.2 (c 1.0, CH<sub>2</sub>Cl<sub>2</sub>). <sup>1</sup>H NMR (500 MHz, CDCl<sub>3</sub>): δ {8.78 (d, *J* = 7.9

Hz, 0.5H) + 8.49 (d, *J* = 8.1 Hz, 0.5H)}, 8.63 (dd, *J*<sub>1</sub> = 14.9 Hz, *J*<sub>2</sub> = 8.2 Hz, 1H), 8.34 (s, 1H), 8.03 (d, *J* = 8.1 Hz, 1H), 7.85-7.81 (m, 1H), 7.79-7.65 (m, 1H), 7.57-7.53 (m, 1H), 4.47-4.43 (m, 1H), {4.18 (dd, *J*<sub>1</sub> = 12.7 Hz, *J*<sub>2</sub> = 2.3 Hz, 0.5H) + 3.98 (dd, *J* = 12.9, 4.1 Hz, 0.5 H)}, 3.52-3.48 (m, 1H), 3.43-3.29 (m, 1H), 3.14-3.05 (m, 1H), 2.63 (s, 3H), 2.11-2.01 (m, 2H), 1.87-1.69 (m, 2H), {1.54 (s, 4H) + 1.52 (s, 5H)}; <sup>13</sup>C NMR (125 MHz, CDCl<sub>3</sub>): δ 158.9 & 158.4, 154.8 & 154.5, 142.1 & 142.0, 136.4

&136.1, 132.6 & 132.5, 130.3 &130.1, 130.2, 129.5 &129.4, 127.7 & 127.4, 126.9 & 126.6, 125.8 & 125.7, 123.6 & 123.5, 122.4 & 122.0, 121.5, 79.7 & 79.0, 57.1 & 56.9, 46.8 & 46.5, 41.1 &40.4, 29.9 & 28.8, 28.7, 23.5 & 22.6, 21.9. HRMS (ESI) for C<sub>24</sub>H<sub>29</sub>N<sub>2</sub>O<sub>2</sub> [M+H]<sup>+</sup>: calcd 377.2224, found 377.2222.

Chiral HPLC Charts for **4s**:

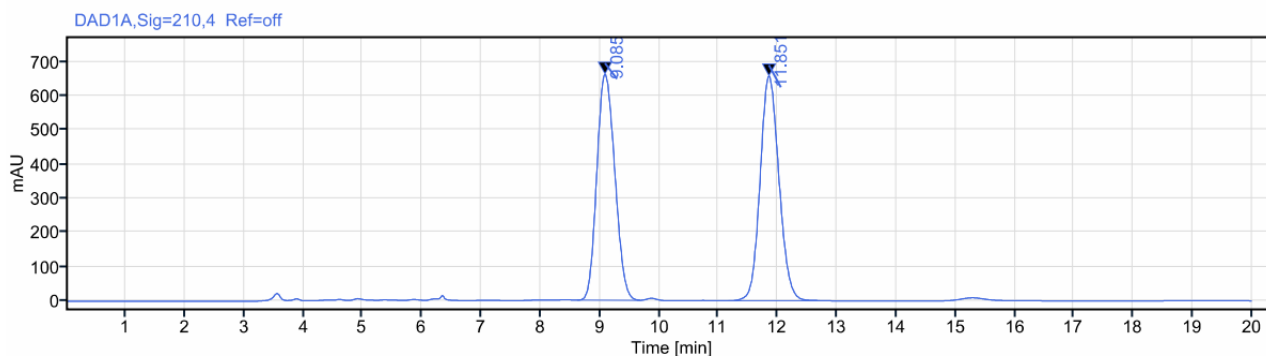

Signal: DAD1A, Sig=210,4 Ref=off

| RT [min] | Type | Width [min] | Area      | Height | Area%   | Name |
|----------|------|-------------|-----------|--------|---------|------|
| 9.085    | BBA  | 1.05        | 13933.145 | 659.80 | 49.0144 |      |
| 11.851   | BBA  | 1.53        | 14493.515 | 656.14 | 50.9856 |      |

**Figure S3.** The HPLC chart of rac-**4s**

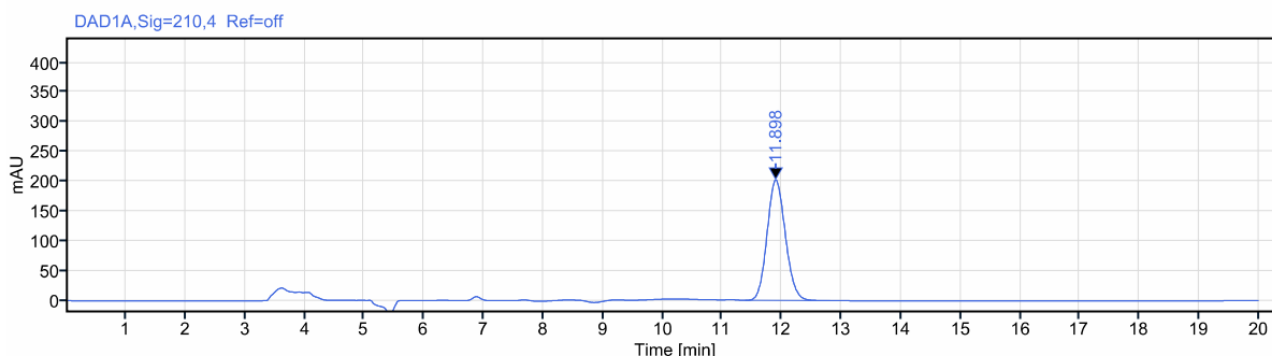

Signal: DAD1A, Sig=210,4 Ref=off

| RT [min] | Type | Width [min] | Area     | Height | Area%    | Name |
|----------|------|-------------|----------|--------|----------|------|
| 11.898   | BBA  | 1.42        | 4319.406 | 202.61 | 100.0000 |      |

**Figure S4.** The HPLC chart of **4s**

**tert-butyl (S)-2-((2-bromophenanthridin-6-yl)methyl)pyrrolidine-1-carboxylate (4t)**

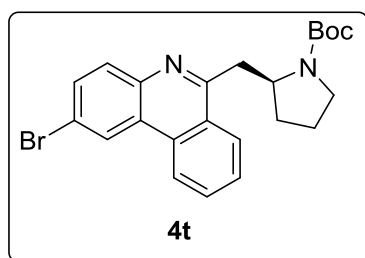

**4t** was isolated via column chromatography (eluent: DCM to PE/EA = 5/1) as colorless liquid (101.7 mg, 77%). Enantiomeric excess was established by HPLC analysis by using a Daicel Chiralpak IG-3 column, *ee* = 94% (HPLC: 254 nm, *n*-Hexane/isopropanol = 90/10, flow rate 0.5 mL/min, 30 °C, *t<sub>r</sub>* (major) = 12.58 min, *t<sub>r</sub>* (min) = 10.16 min). [ $\alpha$ ]<sub>D</sub><sup>25</sup> = +92.4 (c 1.0, CH<sub>2</sub>Cl<sub>2</sub>). <sup>1</sup>H NMR (500 MHz, CDCl<sub>3</sub>):  $\delta$  {8.78 (d, *J* =

7.7 Hz, 0.5H)+ 8.48 (d,  $J = 8.1$  Hz, 0.5H)}, 8.66 (s, 1H), 8.54 (dd,  $J_1 = 14.6$ ,  $J_2 = 8.1$  Hz, 1H), 7.99-7.97 (m, 1H), 7.88-7.70 (m, 3H), 4.46-4.43 (m, 1H), 4.15 (dd,  $J_1 = 12.8$  Hz,  $J_2 = 2.8$  Hz, 1H) + 3.94 (dd,  $J_1 = 13.0$  Hz,  $J_2 = 4.3$  Hz, 0.5H)}, 3.54-3.31 (m, 2H), 3.15-3.05 (m, 1H), 2.08-1.99 (m, 2H), 1.89-1.70 (m, 2H), {1.53 (s, 4.5H) + 1.48 (s, 4.5H)};  $^{13}\text{C}$  NMR (125 MHz,  $\text{CDCl}_3$ ):  $\delta$  160.4 & 159.9, 154.8 & 154.5, 142.44 & 142.36, 131.9 & 131.7, 131.6, 131.44 & 131.35, 130.7, 128.5 & 127.8, 127.5 & 126.6, 125.9 & 125.7, 125.4 & 125.2, 124.8, 122.4 & 122.0, 120.5 & 120.3, 79.8 & 79.1, 57.0 & 56.8, 46.8 & 46.5, 41.1 & 40.4, 30.0 & 29.0, 28.6, 23.5 & 22.6. HRMS (ESI) for  $\text{C}_{23}\text{H}_{26}\text{BrN}_2\text{O}_2$   $[\text{M}+\text{H}]^+$ : calcd 441.1172, found 441.1175.

Chiral HPLC Charts for **4t**:

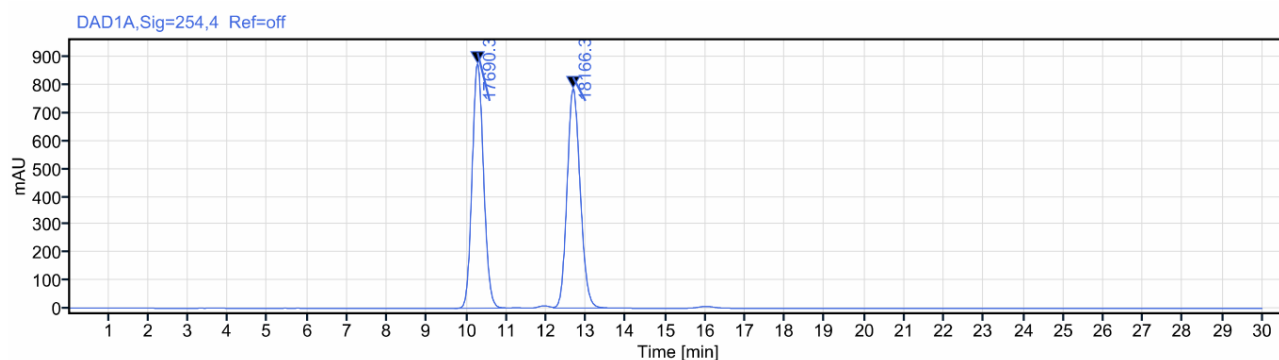

Signal: DAD1A, Sig=254,4 Ref=off

| RT [min] | Type | Width [min] | Area      | Height | Area%   | Name |
|----------|------|-------------|-----------|--------|---------|------|
| 10.274   | BV   | 1.35        | 17690.281 | 880.02 | 49.3363 |      |
| 12.677   | VBA  | 1.94        | 18166.265 | 790.46 | 50.6637 |      |

**Figure S5.** The HPLC chart of rac-**4t**

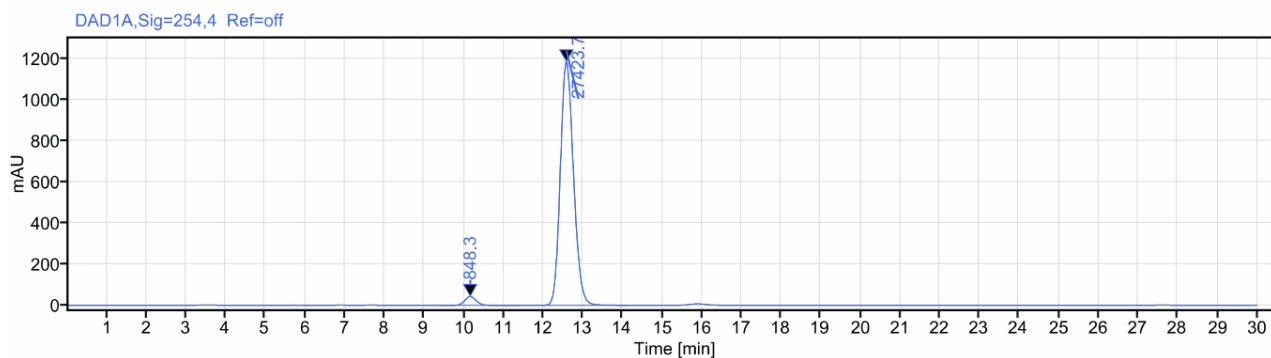

Signal: DAD1A, Sig=254,4 Ref=off

| RT [min] | Type | Width [min] | Area      | Height  | Area%   | Name |
|----------|------|-------------|-----------|---------|---------|------|
| 10.158   | BB   | 2.11        | 848.252   | 42.36   | 3.0003  |      |
| 12.583   | BBA  | 2.15        | 27423.671 | 1184.87 | 96.9997 |      |

**Figure S6.** The HPLC chart of **4t**

**methyl (S)-6-((1-(tert-butoxycarbonyl)pyrrolidin-2-yl)methyl)phenanthridine-2-carboxylate (4u)**



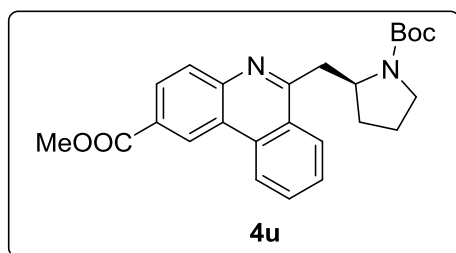

**4u** was isolated via column chromatography (eluent: DCM to PE/EA = 5/1) as colorless liquid (85.7 mg, 68%). Enantiomeric excess was established by HPLC analysis by using a Daicel Chiralpak AD-H column, *ee* = 96% (HPLC: 254 nm, *n*-Hexane/isopropanol = 90/10, flow rate 0.5 mL/min, 30 °C, *t<sub>r</sub>* (major) = 19.19 min, *t<sub>r</sub>* (min) = 20.56 min).  $[\alpha]_D^{25} = +115$  (c 1.0, CH<sub>2</sub>Cl<sub>2</sub>).

<sup>1</sup>H NMR (500 MHz, CDCl<sub>3</sub>): δ 9.29 (s, 1H), {8.80 (d, *J* = 8.0 Hz, 0.5H) + 8.49 (d, *J* = 8.0 Hz, 0.5H)}, 8.73 (dd, *J*<sub>1</sub> = 15.1 Hz, *J*<sub>2</sub> = 8.2 Hz, 2H), 8.33 (t, *J* = 8.4 Hz, 1H), 8.15 (dd, *J*<sub>1</sub> = 8.2 Hz, *J*<sub>2</sub> = 3.9 Hz, 1H), 7.90 (dd, *J*<sub>1</sub> = 12.8 Hz, *J*<sub>2</sub> = 6.8 Hz, 1H), 7.84-7.71 (m, 1H), 4.49 (dd, *J*<sub>1</sub> = 14.3 Hz, *J*<sub>2</sub> = 7.1 Hz, 3H), {4.19 (dd, *J*<sub>1</sub> = 12.7 Hz, *J*<sub>2</sub> = 2.7 Hz, 0.5H) + 3.97 (dd, *J*<sub>1</sub> = 13.0 Hz, *J*<sub>2</sub> = 4.3 Hz, 0.5H)}, 3.54-3.31 (m, 2H), 3.19-3.09 (m, 1H), 2.16-2.07 (m, 3H), 1.90-1.72 (m, 2H), 1.49 (dd, *J*<sub>1</sub> = 24.5 Hz, *J*<sub>2</sub> = 10 Hz, 9H); <sup>13</sup>C NMR (125 MHz, CDCl<sub>3</sub>): δ 166.52 & 166.49, 162.4 & 161.9, 154.7 & 154.4, 146.10 & 146.05, 132.9 & 132.7, 130.9, 129.8 & 129.7, 128.6 & 128.3, 128.0 & 127.9, 127.7 & 127.5, 126.7, 125.9 & 125.7, 124.6, 123.3 & 123.1, 122.6 & 122.2, 79.7 & 79.1, 61.3 & 61.2, 57.0 & 56.8, 46.8 & 46.4, 41.3 & 40.6, 30.1 & 28.9, 28.6, 23.5 & 22.6. HRMS (ESI) for C<sub>25</sub>H<sub>29</sub>N<sub>2</sub>O<sub>4</sub> [M+H]<sup>+</sup>: calcd 421.2122, found 421.2126.

Chiral HPLC Charts for **4u**:

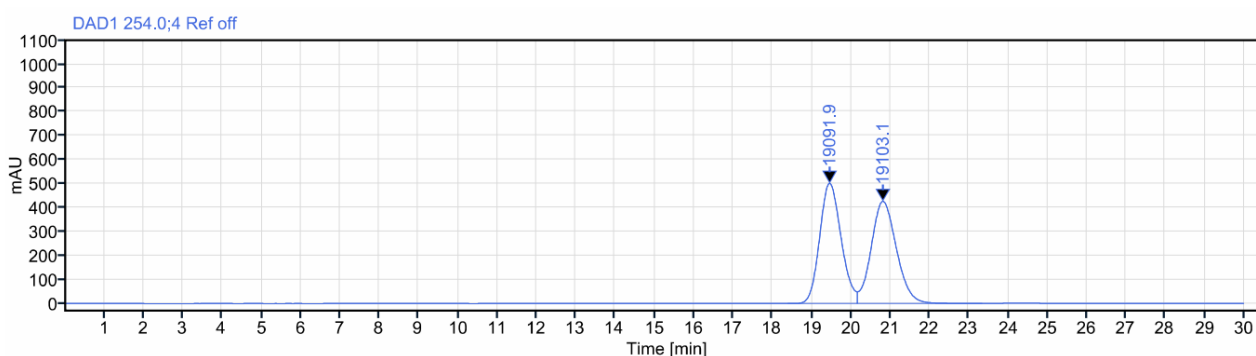

Signal: DAD1 254.0;4 Ref off

| RT [min] | Type | Width [min] | Area      | Height | Area%   | Name |
|----------|------|-------------|-----------|--------|---------|------|
| 19.452   | BV   | 1.77        | 19091.931 | 503.26 | 49.9854 |      |
| 20.808   | VB   | 3.17        | 19103.059 | 427.76 | 50.0146 |      |

**Figure S7.** The HPLC chart of rac-**4u**

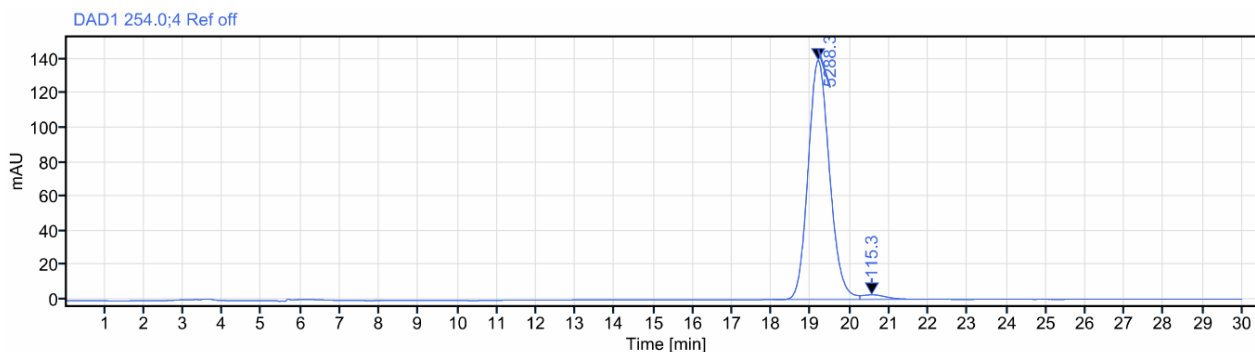

Signal: DAD1 254.0;4 Ref off

| RT [min] | Type | Width [min] | Area     | Height | Area%   | Name |
|----------|------|-------------|----------|--------|---------|------|
| 19.190   | BV   | 2.21        | 5288.271 | 139.08 | 97.8654 |      |
| 20.559   | VB   | 1.71        | 115.345  | 2.70   | 2.1346  |      |

**Figure S8.** The HPLC chart of **4u**

**tert-butyl (S)-2-((2-cyanophenanthridin-6-yl)methyl)pyrrolidine-1-carboxylate (**4v**)**

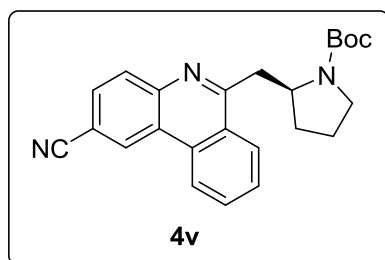

**4v** was isolated via column chromatography (eluent: DCM to PE/EA = 5/1) as colorless liquid (89.4 mg, 77%). Enantiomeric excess was established by HPLC analysis by using a Daicel Chiralpak AD-H column, *ee* = 97% (HPLC: 254 nm, *n*-Hexane/isopropanol = 80/20, flow rate 0.6 mL/min, 30 °C, *t<sub>r</sub>* (major) = 8.56 min, *t<sub>r</sub>* (min) = 8.97 min).  $[\alpha]_D^{25} = +16.0$  (c 1.0, CH<sub>2</sub>Cl<sub>2</sub>). <sup>1</sup>H NMR (500 MHz, CDCl<sub>3</sub>): δ

8.87 (s, 1H), {8.81 (d, *J* = 7.9 Hz, 0.5H) + 8.51 (d, *J* = 8.0 Hz, 0.5H)}, 8.59 (dd, *J*<sub>1</sub> = 18.3 Hz, *J*<sub>2</sub> = 8.0 Hz, 2H), 8.19-8.16 (m, 1H), 7.96-7.75 (m, 3H), 4.46 (s, 1H), {4.17 (dd, *J*<sub>1</sub> = 12.8 Hz, *J*<sub>2</sub> = 2.9 Hz, 0.5H) + 3.96 (dd, *J*<sub>1</sub> = 13.0 Hz, *J*<sub>2</sub> = 4.1 Hz, 0.5H)} 3.51-3.32 (m, 2H), 3.21-3.10 (m, 1H), 2.07-1.98 (m, 2H), 1.86-1.74 (m, 2H), {1.51 (s, 5H) + 1.45 (s, 4H)}; <sup>13</sup>C NMR (125 MHz, CDCl<sub>3</sub>): δ 163.5 & 163.0, 154.8 & 154.4, 145.44 & 145.38, 131.7 & 131.53, 131.47, 131.0 & 130.9, 130.2 & 130.0, 129.1 & 128.5, 127.7, 126.9, 126.1 & 126.0, 124.02 & 123.9, 122.4 & 122.0, 109.9 & 109.6, 79.8 & 79.2, 57.0 & 56.8, 53.4, 46.8 & 46.4, 41.3 & 40.6, 30.2 & 29.1, 28.6, 23.5 & 22.6. HRMS (ESI) for C<sub>24</sub>H<sub>26</sub>N<sub>3</sub>O<sub>2</sub> [M+H]<sup>+</sup>: calcd 388.2020, found 388.2022.

Chiral HPLC Charts for **4v**:

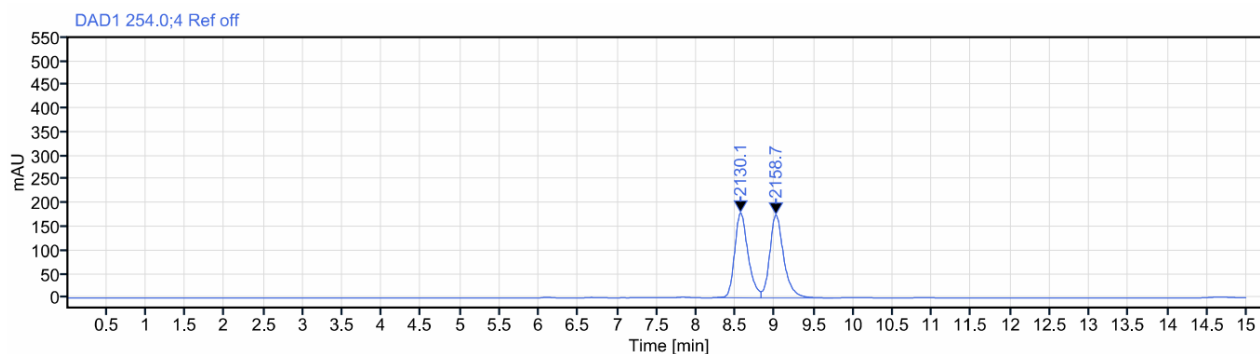

Signal: DAD1 254.0;4 Ref off

| RT [min] | Type | Width [min] | Area     | Height | Area%   | Name |
|----------|------|-------------|----------|--------|---------|------|
| 8.564    | BV   | 0.62        | 2130.112 | 179.42 | 49.6671 |      |
| 9.013    | VB   | 0.91        | 2158.664 | 175.15 | 50.3329 |      |

Figure S9. The HPLC chart of rac-4v

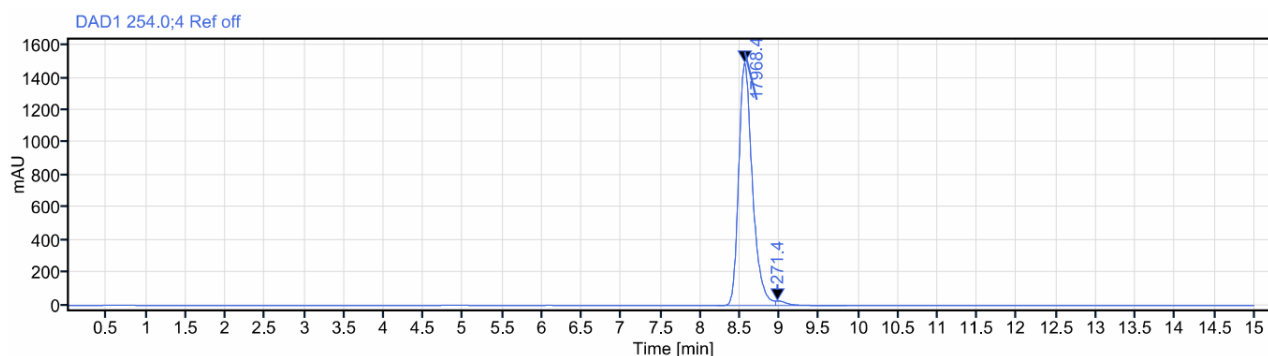

Signal: DAD1 254.0;4 Ref off

| RT [min] | Type | Width [min] | Area      | Height  | Area%   | Name |
|----------|------|-------------|-----------|---------|---------|------|
| 8.559    | BV   | 0.74        | 17968.373 | 1491.63 | 98.5123 |      |
| 8.974    | VB   | 0.90        | 271.354   | 27.88   | 1.4877  |      |

Figure S10. The HPLC chart of 4v

**tert-butyl (S)-2-((3-(trifluoromethyl)phenanthridin-6-yl)methyl)pyrrolidine-1-carboxylate (4w)**

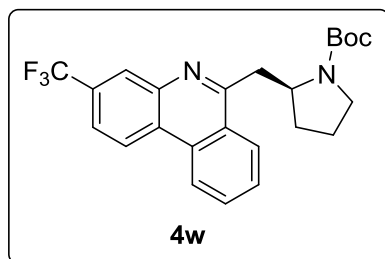

**4w** was isolated via column chromatography (eluent: DCM to PE/EA = 5/1) as colorless liquid (100.6 mg, 78%). Enantiomeric excess was established by HPLC analysis by using a Daicel Chiralpak IG-3 column, *ee* > 99% (HPLC: 210 nm, *n*-Hexane/isopropanol = 90/10, flow rate 0.5 mL/min, 30 °C, *t<sub>r</sub>* (major) = 7.95 min, *t<sub>r</sub>* (minor) = 6.80 min).  $[\alpha]_D^{25} = +24.4$  (c 1.0, CH<sub>2</sub>Cl<sub>2</sub>). <sup>1</sup>H NMR (500 MHz, CDCl<sub>3</sub>): δ

{8.85 (s, 1.5H), 8.52 (d, *J* = 8.0 Hz, 0.5H)}, 8.65 (dd, *J*<sub>1</sub> = 14.9 Hz, *J*<sub>2</sub> = 8.2 Hz, 1H), 8.23-8.21 (m, 1H), 7.93-7.89 (m, 2H), {7.85 (t, *J* = 7.3 Hz, 0.5H) + 7.75 (t, *J* = 7.3 Hz, 0.5H)}, 4.47 (s, 1H), {4.19 (dd, *J*<sub>1</sub> = 12.6 Hz, *J*<sub>2</sub> = 2.1 Hz, 0.5H) + 3.94 (dd, *J*<sub>1</sub> = 12.9 Hz, *J*<sub>2</sub> = 3.7 Hz, 0.5H)}, 3.52-3.49 (m, 1H), 3.47-3.32 (m, 1H), 3.21-3.11 (m, 1H), 2.08-2.01 (m, 3H), 1.89-1.73 (m, 2H), {1.53 (s, 5H) + 1.48 (s,

4H)};  $^{13}\text{C}$  NMR (125 MHz,  $\text{CDCl}_3$ ):  $\delta$  162.4 & 161.9, 154.7 & 154.4, 145.1, 132.4 & 132.3, 131.0 & 130.6, 130.5, 128.6, 128.0, 127.6, 126.8, 126.0 & 125.9, 125.5, 124.5 & 124.3, 124.4 (q,  $J = 260$  Hz) 123.4 & 123.3, 122.4 & 122.0, 119.8 (q,  $J = 3.75$  Hz), 79.8 & 79.1, 57.0 & 56.8, 46.9 & 46.4, 41.1 & 40.5, 30.0 & 29.0, 28.6, 23.5 & 22.6. HRMS (ESI) for  $\text{C}_{24}\text{H}_{26}\text{F}_3\text{N}_3\text{O}_2$   $[\text{M}+\text{H}]^+$ : calcd 431.1941, found 431.1944.

Chiral HPLC Charts for **4w**:

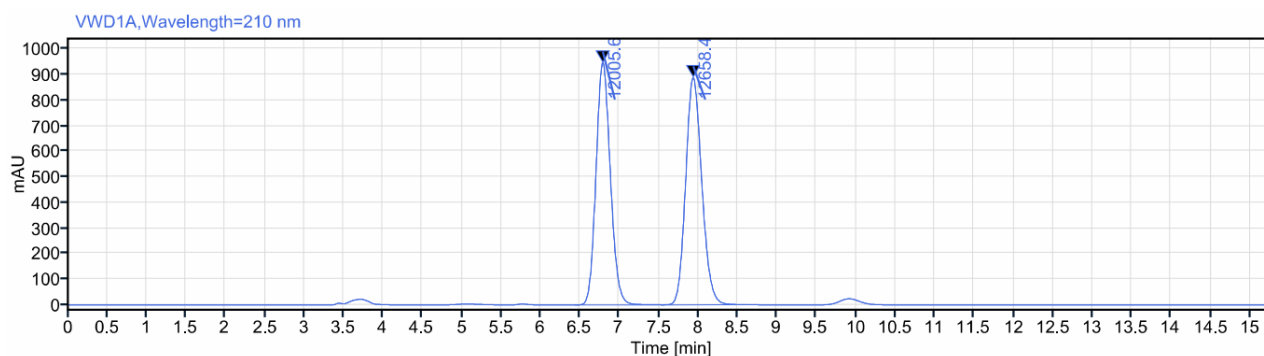

Signal: VWD1A,Wavelength=210 nm

| RT [min] | Type | Width [min] | Area      | Height | Area%   | Name |
|----------|------|-------------|-----------|--------|---------|------|
| 6.788    | BB   | 1.13        | 12005.586 | 948.29 | 48.6766 |      |
| 7.936    | BBA  | 1.05        | 12658.416 | 890.01 | 51.3234 |      |

**Figure S11.** The HPLC chart of rac-**4w**

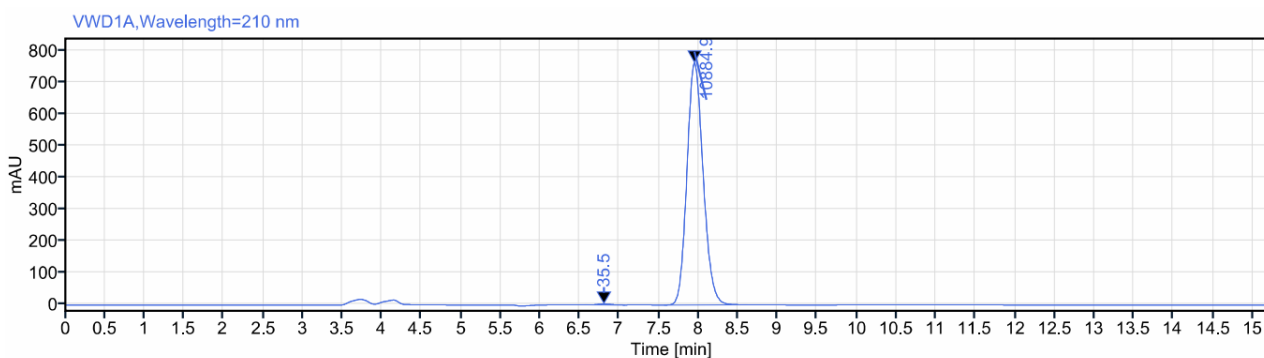

Signal: VWD1A,Wavelength=210 nm

| RT [min] | Type | Width [min] | Area      | Height | Area%   | Name |
|----------|------|-------------|-----------|--------|---------|------|
| 6.804    | BB   | 0.50        | 35.547    | 3.02   | 0.3255  |      |
| 7.949    | BBA  | 1.04        | 10884.872 | 763.55 | 99.6745 |      |

**Figure S12.** The HPLC chart of **4w**

**tert-butyl (S)-2-((8-methoxyphenanthridin-6-yl)methyl)pyrrolidine-1-carboxylate (4x)**

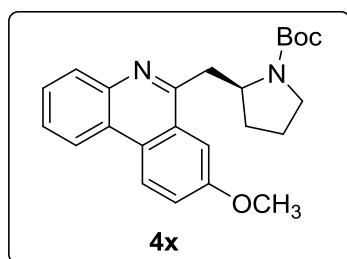

**4x** was isolated via column chromatography (eluent: DCM to PE/EA = 5/1) as colorless liquid (83.6 mg, 71%). Enantiomeric excess was established by HPLC analysis by using a Daicel Chiralpak IG-3 column, *ee* > 99% (HPLC: 210 nm, *n*-Hexane/isopropanol = 90/10, flow rate 0.5 mL/min, 30 °C, *t<sub>r</sub>* (major) = 7.00 min, *t<sub>r</sub>* (min) = 6.40 min).  $[\alpha]_D^{25} = +65.9$  (c 1.0, CH<sub>2</sub>Cl<sub>2</sub>). <sup>1</sup>H NMR (500 MHz, CDCl<sub>3</sub>): δ 8.52-8.45 (m, 3H), 8.11

(d, *J* = 8.0 Hz, 1H), 7.66-7.58 (m, 2H), 7.47-7.45 (m, 1H), 4.41-4.21 (m, 1H), {4.16 (s, 2.5 H) + 4.00 (s, 0.5H)}, 3.53-3.51 (m, 1H), 3.34-3.31 (m, 1H), 2.99-2.94 (m, 1H), 2.24-2.13 (m, 2H), 1.90-1.85 (m, 1H), 1.74-1.67 (m, 1H), {1.53 (s, 7H) + 1.30 (s, 2H)}; <sup>13</sup>C NMR (125 MHz, CDCl<sub>3</sub>): δ 159.3 & 159.2, 154.7, 142.9, 129.6, 127.3, 127.2, 127.0, 126.4, 124.1, 123.5, 121.9, 121.4, 107.4, 79.1, 57.1 & 56.2, 46.8, 41.3, 28.9, 28.6, 26.9, 23.6. HRMS (ESI) for C<sub>24</sub>H<sub>29</sub>N<sub>3</sub>O<sub>2</sub> [M+H]<sup>+</sup>: calcd 393.2173, found 393.2175.

Chiral HPLC Charts for **4x**:

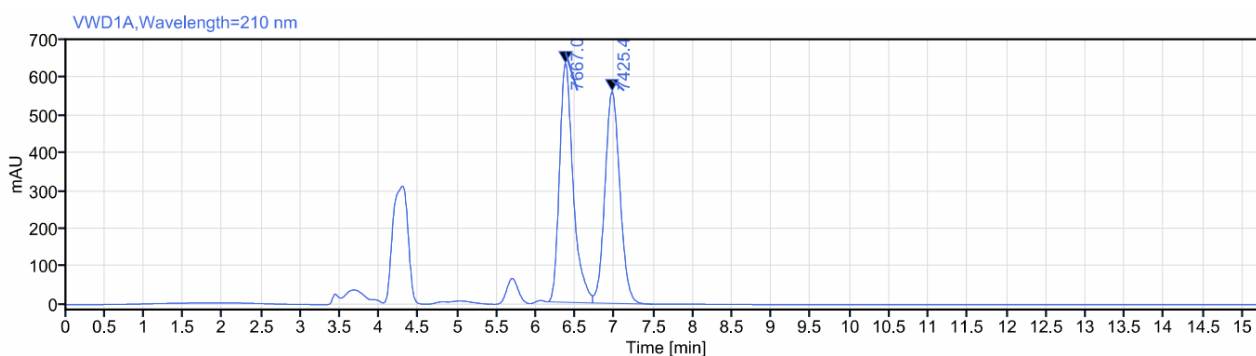

Signal: VWD1A, Wavelength=210 nm

| RT [min] | Type | Width [min] | Area     | Height | Area%   | Name |
|----------|------|-------------|----------|--------|---------|------|
| 6.373    | BV   | 0.58        | 7666.956 | 632.52 | 50.8003 |      |
| 6.967    | VB   | 0.76        | 7425.387 | 560.63 | 49.1997 |      |

**Figure S13.** The HPLC chart of rac-**4x**

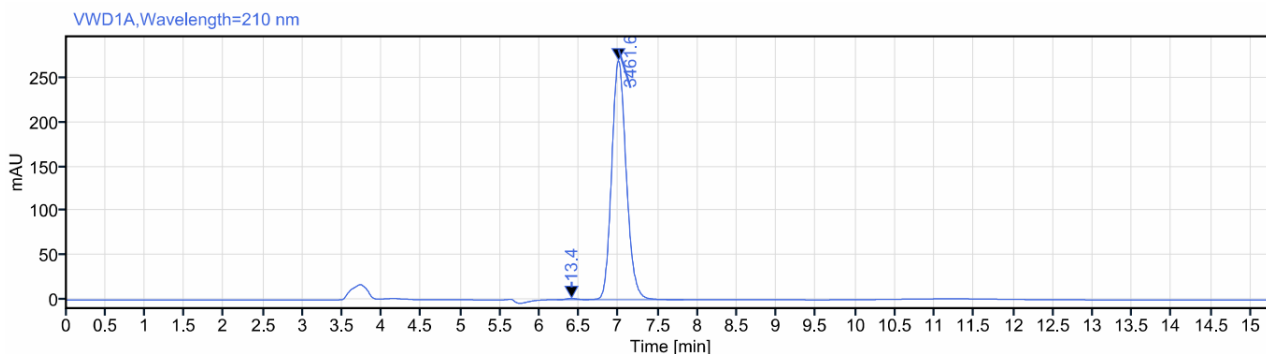

Signal: VWD1A,Wavelength=210 nm

| RT [min] | Type | Width [min] | Area     | Height | Area%   | Name |
|----------|------|-------------|----------|--------|---------|------|
| 6.403    | BB   | 0.37        | 13.371   | 1.41   | 0.3848  |      |
| 6.997    | BB   | 1.23        | 3461.589 | 269.89 | 99.6152 |      |

Figure S14. The HPLC chart of **4x**

**tert-butyl (S)-2-((8-methylphenanthridin-6-yl)methyl)pyrrolidine-1-carboxylate (**4y**)**

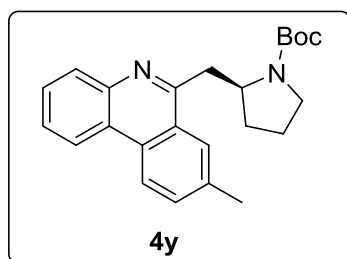

**4y** was isolated via column chromatography (eluent: DCM to PE/EA = 5/1) as colorless liquid (83.4 mg, 74%). Enantiomeric excess was established by HPLC analysis by using a Daicel Chiralpak IG-3 column, *ee* = 97 % (HPLC: 210 nm, *n*-Hexane/isopropanol = 90/10, flow rate 0.5 mL/min, 30 °C, *t<sub>r</sub>* (major) = 8.42 min, *t<sub>r</sub>* (min) = 7.22 min).  $[\alpha]_D^{25} = +59.3$  (c 1.0, CH<sub>2</sub>Cl<sub>2</sub>). <sup>1</sup>H NMR (500 MHz, CDCl<sub>3</sub>): δ 8.80 (d, *J* = 8.1 Hz, 1H),

8.74-8.43 (m, 1H), 8.18 (d, *J* = 7.9 Hz, 1H), 7.75-7.57(m, 4H), 4.47-4.46 (m, 1H), 4.22-4.00 (m, 1H), 3.55-3.34 (m, 3H), 3.14 (s, 1H), 3.13-3.07 (m, 1H), 2.12-1.98 (m, 2H), 1.87-1.67 (m, 2H), 1.54 (s, 9H); <sup>13</sup>C NMR (125 MHz, CDCl<sub>3</sub>): δ 160.2 & 159.7, 154.8 & 154.5, 144.94 & 144.87, 135.6, 135.2, 134.7 & 134.6, 132.4, 130.1 & 129.9, 127.8, 127.6, 127.3 & 127.1, 126.5, 125.9 & 125.7, 125.5 & 125.1, 79.7 & 79.1, 57.1 & 56.9, 46.8 & 46.5, 41.6 & 40.9, 29.9 & 28.9, 28.7, 26.9, 23.5 & 22.6. HRMS (ESI) for C<sub>24</sub>H<sub>29</sub>N<sub>3</sub>O<sub>2</sub> [M+H]<sup>+</sup>: calcd 377.2224, found 377.2226.

Chiral HPLC Charts for **4y**:

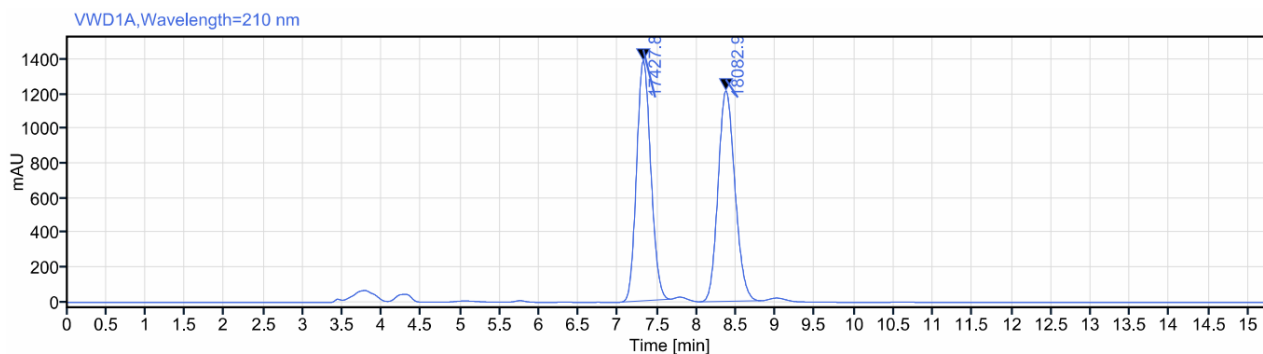

Signal: VWD1A,Wavelength=210 nm

| RT [min] | Type | Width [min] | Area      | Height  | Area%   | Name |
|----------|------|-------------|-----------|---------|---------|------|
| 7.320    | BB   | 0.64        | 17427.808 | 1385.36 | 49.0777 |      |
| 8.370    | BB   | 0.78        | 18082.862 | 1215.56 | 50.9223 |      |

**Figure S15.** The HPLC chart of rac-4y

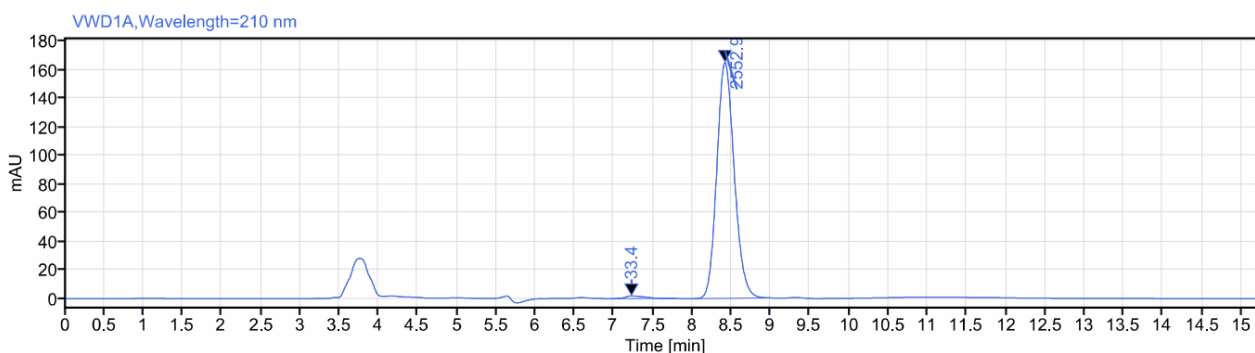

Signal: VWD1A,Wavelength=210 nm

| RT [min] | Type | Width [min] | Area     | Height | Area%   | Name |
|----------|------|-------------|----------|--------|---------|------|
| 7.224    | BBA  | 0.83        | 33.387   | 1.91   | 1.2909  |      |
| 8.417    | BBA  | 0.99        | 2552.880 | 165.35 | 98.7091 |      |

**Figure S16.** The HPLC chart of 4y

***tert*-butyl (*S*)-2-((8-(trifluoromethyl)phenanthridin-6-yl)methyl)pyrrolidine-1-carboxylate (4z)**

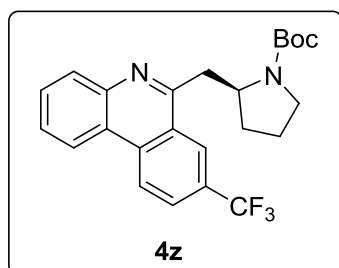

**4z** was isolated via column chromatography (eluent: DCM to PE/EA = 5/1) as colorless liquid (69.4 mg, 54%). Enantiomeric excess was established by HPLC analysis by using a Daicel Chiralpak IG-3 column, *ee* > 99 % (HPLC: 210 nm, *n*-Hexane/isopropanol = 90/10, flow rate 0.5 mL/min, 30 °C, *t<sub>r</sub>* (major) = 6.845 min, *t<sub>r</sub>* (minor) = 6.064 min).  $[\alpha]_D^{25} = +18.9$  (c 1.0, CH<sub>2</sub>Cl<sub>2</sub>). <sup>1</sup>H NMR (500 MHz, CDCl<sub>3</sub>): δ {9.16 (s, 0.6H) + 8.53-8.52 (m, 1.4 H)}, 8.73-8.68 (m, 1H), 8.15 (d, *J* = 8.0 Hz, 1H), 8.03-7.99 (m, 1H), 7.78-7.75 (m, 1H), 7.67 (m, 1H), 4.51 (d, *J* = 39.1 Hz, 1H), {4.17-4.06 (m, 0.6H) + 3.97-3.94 (m, 0.4H)}, 3.52-3.34 (m, 2H), 3.29-3.12 (m, 1H), 2.05-1.86 (m, 4H), {1.48 (s, 5H), 1.28(s, 4H)}; <sup>13</sup>C NMR (125 MHz, CDCl<sub>3</sub>): δ 159.8 & 159.2, 154.8 & 154.4, 144.4, 135.0 & 134.9, 130.0, 129.8, 129.5, 127.09, 126.8,

126.2 & 126.2, 125.2 & 125.0, 123.7 & 123.5, 123.1, 122.8 & 122.6, 122.3, 79.4 & 79.2, 57.1 & 56.7, 46.7 & 46.3, 40.8 & 40.6, 31.0 & 29.6, 28.5 & 28.3, 22.9 & 22.6. HRMS (ESI) for C<sub>24</sub>H<sub>29</sub>N<sub>2</sub>O<sub>3</sub> [M+H]<sup>+</sup>: calcd 431.1941, found 431.1944.

Chiral HPLC Charts for **4z**:

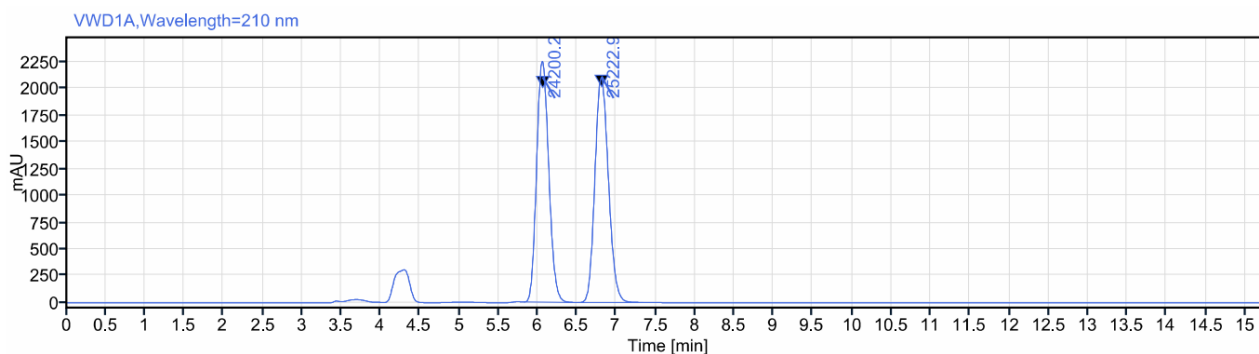

Signal: VWD1A, Wavelength=210 nm

| RT [min] | Type | Width [min] | Area      | Height  | Area%   | Name |
|----------|------|-------------|-----------|---------|---------|------|
| 6.064    | BB   | 0.63        | 24200.173 | 1998.47 | 48.9653 |      |
| 6.811    | BBA  | 0.82        | 25222.906 | 2011.21 | 51.0347 |      |

**Figure S17.** The HPLC chart of rac-**4z**

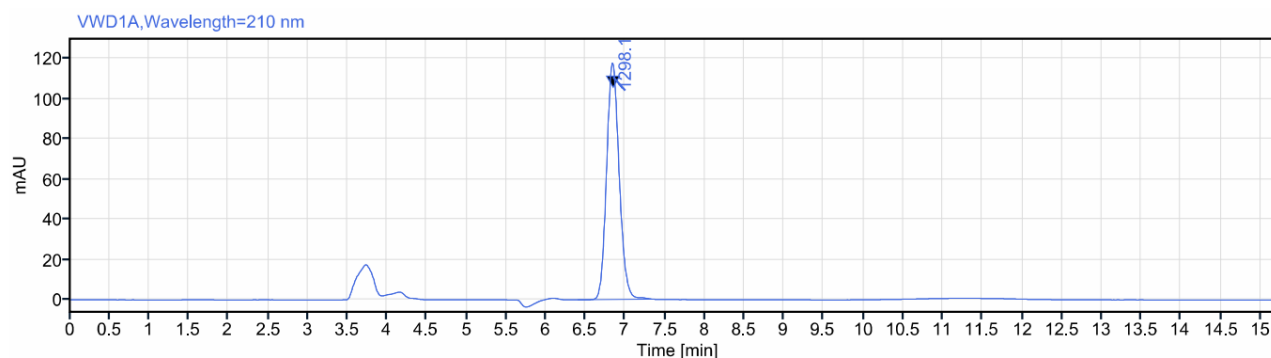

Signal: VWD1A, Wavelength=210 nm

| RT [min] | Type | Width [min] | Area     | Height | Area%    | Name |
|----------|------|-------------|----------|--------|----------|------|
| 6.845    | BBA  | 0.93        | 1298.133 | 105.15 | 100.0000 |      |

**Figure S18.** The HPLC chart of rac-**4z**

**tert-butyl (S)-2-((8-(trifluoromethoxy)phenanthridin-6-yl)methyl)pyrrolidine-1-carboxylate (4za)**

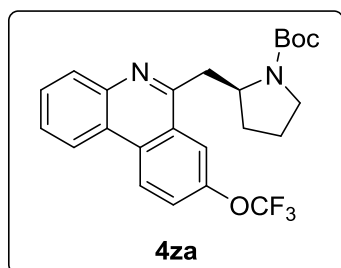

**4za** was isolated via column chromatography (eluent: DCM to PE/EA = 5/1) as colorless liquid (95.0 mg, 71%). Enantiomeric excess was established by HPLC analysis by using a Daicel Chiralpak IG-3 column, *ee* > 99% (HPLC: 210 nm, *n*-Hexane/isopropanol = 95/5, flow rate 0.4 mL/min, 30 °C, *t<sub>r</sub>* (major) = 12.32 min, *t<sub>r</sub>* (minor) = 9.19 min).  $[\alpha]_D^{25} = +70.3$  (c 1.0, CH<sub>2</sub>Cl<sub>2</sub>). <sup>1</sup>H NMR (500 MHz, CDCl<sub>3</sub>): δ {8.71-8.65 (m,



1.45H) + 8.22 (s, 0.5H)}, 8.54-8.52 (m, 1H), 8.16-8.14 (m, 1H), 7.78-7.64 (m, 3H), 4.45 (s, 1H), {4.06 (dd,  $J_1 = 12.7$  Hz,  $J_2 = 2.1$  Hz, 0.5H), 3.94 (dd,  $J_1 = 13.2$  Hz,  $J_2 = 4.7$  Hz, 0.5H)}, 3.54-3.51 (m, 1H), 3.48-3.31 (m, 1H), 3.19-3.12 (m, 1H), 2.09-1.83 (m, 4H), {1.49 (s, 4H), 1.44 (s, 5H)};  $^{13}\text{C}$  NMR (125 MHz,  $\text{CDCl}_3$ ):  $\delta$  159.24 & 159.21, 158.61 & 158.58, 154.7 & 154.5, 148.1 & 147.9, 143.8, 131.5 & 131.3, 130.02 & 130.01, 129.1 & 128.9, 127.1 & 126.8, 124.7 & 124.3, 123.8, 123.0 & 122.8, 121.9, 120.6 (q,  $J = 264.2$  Hz), 118.8 & 118.2, 79.8 & 79.2, 57.0 & 56.6, 46.7 & 46.5, 41.0 & 40.5, 30.3 & 29.4, 28.5, 23.7 & 22.7. HRMS (ESI) for  $\text{C}_{24}\text{H}_{26}\text{F}_3\text{N}_3\text{O}_3$   $[\text{M}+\text{H}]^+$ : calcd 447.1890, found 447.1893.

Chiral HPLC Charts for **4za**:

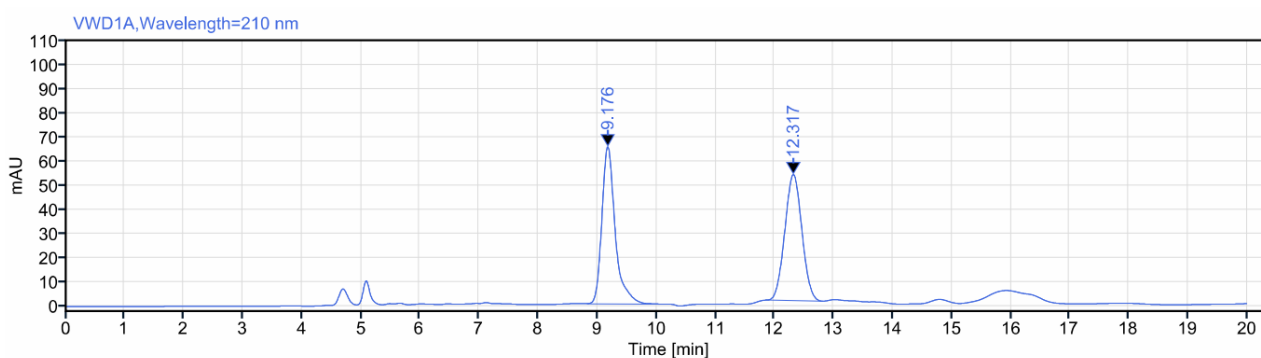

Signal: VWD1A,Wavelength=210 nm

| RT [min] | Type | Width [min] | Area     | Height | Area%   | Name |
|----------|------|-------------|----------|--------|---------|------|
| 9.176    | VBA  | 1.22        | 1023.107 | 65.10  | 49.3407 |      |
| 12.317   | BB   | 0.97        | 1050.451 | 52.20  | 50.6593 |      |

Figure S19. The HPLC chart of rac-**4za**

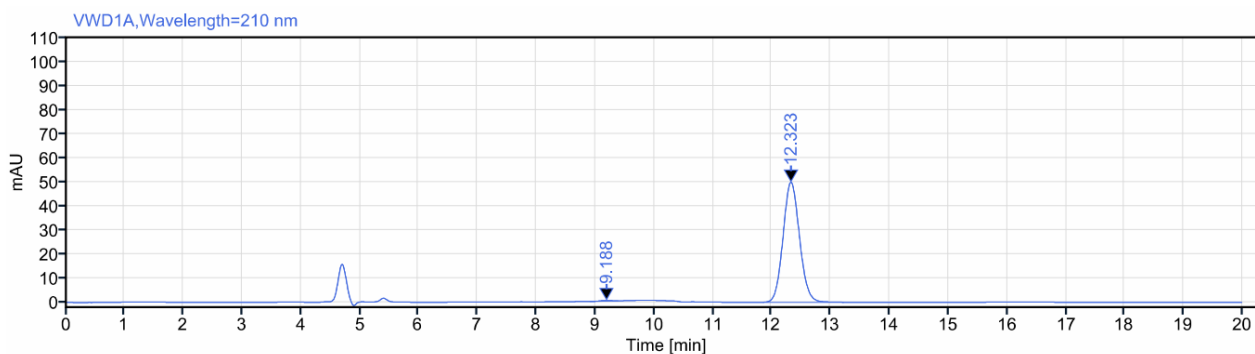

Signal: VWD1A,Wavelength=210 nm

| RT [min] | Type | Width [min] | Area    | Height | Area%   | Name |
|----------|------|-------------|---------|--------|---------|------|
| 9.188    | BB   | 0.48        | 3.472   | 0.27   | 0.3561  |      |
| 12.323   | BV   | 1.38        | 971.679 | 49.89  | 99.6439 |      |

Figure S20. The HPLC chart of **4za**

*tert*-butyl (*S*)-2-((7,9-dimethylphenanthridin-6-yl)methyl)pyrrolidine-1-carboxylate (**4zb**)

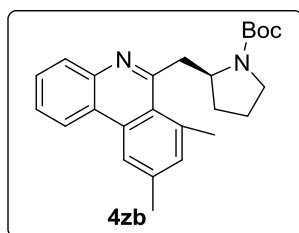

**4zb** was isolated via column chromatography (eluent: DCM to PE/EA = 5/1) as colorless liquid (78.5 mg, 67%). Enantiomeric excess was established by HPLC analysis by using a Daicel Chiralpak IG-3 column, *ee* = 97% (HPLC: 210 nm, n-Hexane/isopropanol = 90/10, flow rate 0.5 mL/min, 30 °C, *t<sub>r</sub>* (major) = 9.40 min, *t<sub>r</sub>* (min) = 8.57 min).  $[\alpha]_D^{25} = +85.5$  (c 1.0, CH<sub>2</sub>Cl<sub>2</sub>). <sup>1</sup>H NMR (500 MHz, CDCl<sub>3</sub>): δ 8.50 (d, *J* = 7.8 Hz, 1H), 8.33 (d, *J* = 8.3 Hz, 1H), 8.03 (d, *J* = 8.0 Hz, 1H), 7.66-7.57 (m, 2H), 7.32 (s, 1H), 4.67 (d, *J* = 1.9 Hz, 1H), {4.22 (d, *J* = 13.9 Hz, 0.5H), 4.05 (d, *J* = 14.6 Hz, 0.5H)}, 3.51-3.34 (m, 3H) 3.01 (d, *J* = 35.2 Hz, 3H), 2.57(s, 3H), 2.12-1.68 (m, 4H), {1.47 (s, 4H), 1.32 (s, 5H)}; <sup>13</sup>C NMR (125 MHz, CDCl<sub>3</sub>) δ 159.1, 154.7, 143.0, 139.5, 134.6, 133.5, 129.4, 128.2, 126.1, 124.4, 123.4, 122.1, 120.6, 120.4, 79.1 & 78.9, 56.9, 46.8 & 46.4, 44.9 & 44.3, 31.8 & 30.2, 28.5, 26.3 & 26.0, 23.5 & 22.9, 21.7. HRMS (ESI) for C<sub>25</sub>H<sub>31</sub>N<sub>2</sub>O<sub>3</sub> [M+H]<sup>+</sup>: calcd 391.2380, found 391.2184.

Chiral HPLC Charts for **4zb**:

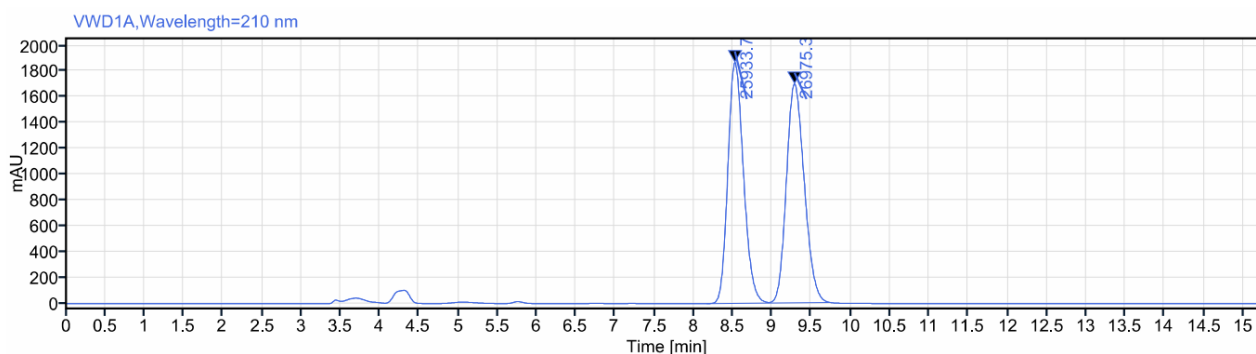

Signal: VWD1A, Wavelength=210 nm

| RT [min] | Type | Width [min] | Area      | Height  | Area%   | Name |
|----------|------|-------------|-----------|---------|---------|------|
| 8.525    | BV   | 0.79        | 25933.706 | 1869.41 | 49.0157 |      |
| 9.284    | VBA  | 0.79        | 26975.270 | 1699.03 | 50.9843 |      |

**Figure S21.** The HPLC chart of rac-**4zb**

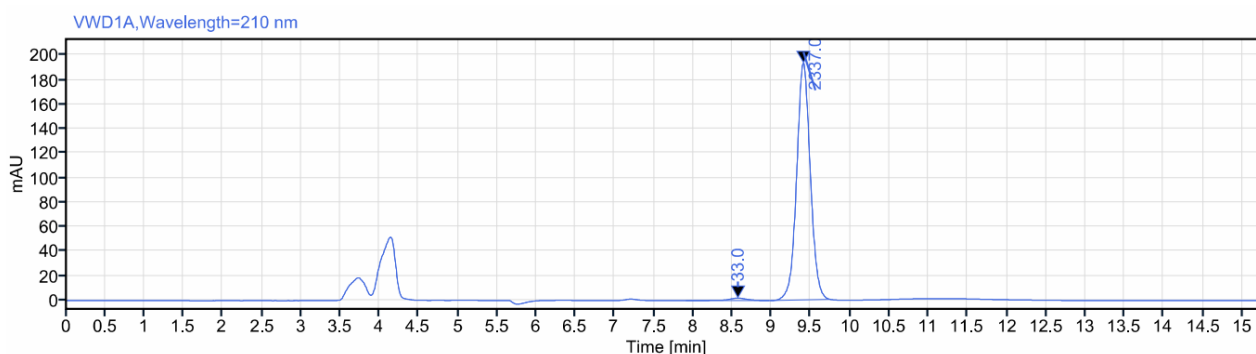

Signal: VWD1A, Wavelength=210 nm

| RT [min] | Type | Width [min] | Area     | Height | Area%   | Name |
|----------|------|-------------|----------|--------|---------|------|
| 8.570    | BB   | 1.06        | 32.969   | 1.99   | 1.3911  |      |
| 9.404    | BBA  | 0.76        | 2336.972 | 192.91 | 98.6089 |      |

**Figure S22.** The HPLC chart of **4zb**

***tert*-butyl (*S*)-2-((10-methoxyphenanthridin-6-yl)methyl)pyrrolidine-1-carboxylate (**4zc**)**

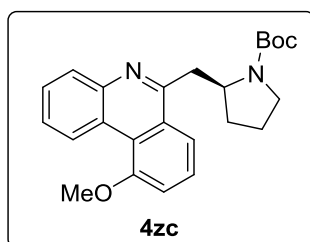

**4zc** was isolated via column chromatography (eluent: DCM to PE/EA = 5/1) as colorless liquid (61.1 mg, 53%). Enantiomeric excess was established by HPLC analysis by using a Daicel Chiralpak IG-3 column, *ee* > 99% (HPLC: 210 nm, *n*-Hexane/isopropanol = 90/10, flow rate 0.5 mL/min, 30 °C, *t<sub>r</sub>* (major) = 10.73 min, *t<sub>r</sub>* (min) = 11.70 min).  $[\alpha]_D^{25} = +112.0$  (c 1.0, CH<sub>2</sub>Cl<sub>2</sub>).

**<sup>1</sup>H NMR** (500 MHz, CDCl<sub>3</sub>): δ 9.49 (dd, *J*<sub>1</sub> = 8.5 Hz, *J*<sub>2</sub> = 1.1 Hz, 1H), 8.46-8.14 (m, 2H), 7.77-7.60 (m, 3H), 7.34 (d, *J* = 7.9 Hz, 1H), 4.49-4.46 (m, 1H), 4.20-3.98 (m, 2H), 4.16 (s, 3H), 3.55-3.31 (m, 2H), 3.15-3.06 (m, 1H), 2.14-2.02 (m, 2H), 2.01-1.78 (m, 2H), 1.54 (s, 9H); **<sup>13</sup>C NMR** (125 MHz, CDCl<sub>3</sub>): δ 158.9 & 158.5, 154.8 & 154.5, 144.3, 129.5 & 129.4, 127.9, 127.7, 127.3, 126.4, 126.2, 123.6 & 123.5, 123.4 & 123.2, 119.7, 118.9, 111.6 & 111.5, 79.7 & 79.0, 57.0 & 56.8, 55.8, 46.8 & 46.5, 41.6 & 40.9, 29.9 & 28.9, 28.7, 23.5 & 22.7. HRMS (ESI) for C<sub>24</sub>H<sub>29</sub>N<sub>2</sub>O<sub>3</sub> [M+H]<sup>+</sup>: calcd 393.2173, found 393.2175.

Chiral HPLC Charts for **4zc**:

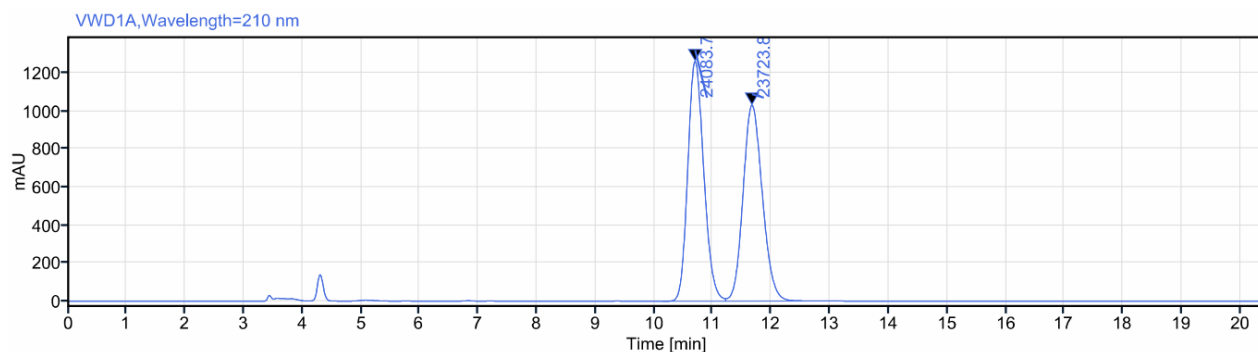

Signal: VWD1A,Wavelength=210 nm

| RT [min] | Type | Width [min] | Area      | Height  | Area%   | Name |
|----------|------|-------------|-----------|---------|---------|------|
| 10.697   | VV   | 1.08        | 24083.689 | 1265.03 | 50.3764 |      |
| 11.668   | VBA  | 1.91        | 23723.777 | 1034.18 | 49.6236 |      |

Figure S23. The HPLC chart of rac-4zc

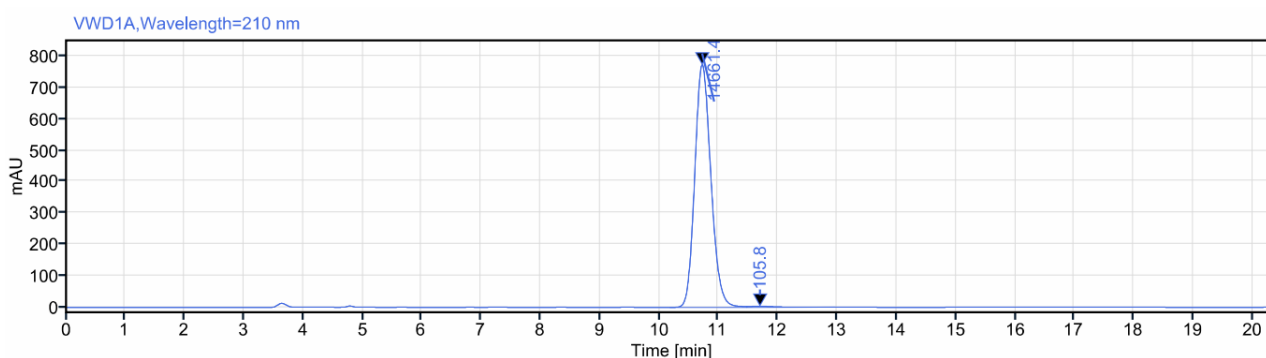

Signal: VWD1A,Wavelength=210 nm

| RT [min] | Type | Width [min] | Area      | Height | Area%   | Name |
|----------|------|-------------|-----------|--------|---------|------|
| 10.725   | BV   | 1.30        | 14661.401 | 773.84 | 99.2836 |      |
| 11.700   | VB   | 1.48        | 105.790   | 3.47   | 0.7164  |      |

Figure S24. The HPLC chart of 4zc

***tert*-butyl (*R*)-(3-methyl-1-(phenanthridin-6-yl)butan-2-yl)carbamate (4zd):**

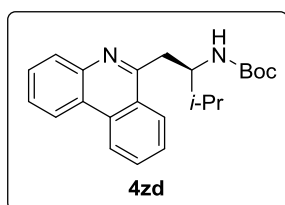

**4zd** was isolated via column chromatography (eluent: DCM to PE/EA = 5/1) as colorless liquid (86.25 mg, 83%, 96% *ee*). Mp: 144-146 °C Enantiomeric excess was established by HPLC analysis by using a Daicel Chiralpak AD column, *ee* = 96 % (HPLC: 210 nm, *n*-Hexane/isopropanol = 90/10, flow rate 0.5 mL/min, 30 °C,  $t_r$  (major) = 10.856 min,  $t_r$  (min) = 7.494 min).  $[\alpha]_D^{25} =$

+8.2 (c 1.0, CH<sub>2</sub>Cl<sub>2</sub>). <sup>1</sup>H NMR (500 MHz, CDCl<sub>3</sub>) δ 8.66 (d, *J* = 8.2 Hz, 1H), 8.56 (dd, *J*<sub>1</sub> = 8.1 Hz, *J*<sub>2</sub> = 1.1 Hz, 1H), 8.32 (d, *J* = 8.0 Hz, 1H), 8.13 (dd, *J*<sub>1</sub> = 8.1, *J*<sub>2</sub> = 0.7 Hz, 1H), 7.90-7.82 (m, 1H), 7.75-7.71 (m, 2H), 7.66-7.62 (m, 1H), 5.24 (d, *J* = 8.3 Hz, 1H), 4.12-4.07 (m, 1H), 3.65 (dd, *J*<sub>1</sub> = 14.2, *J*<sub>2</sub> = 4.6 Hz, 1H), 3.40 (dd, *J* = 14.1, 8.5 Hz, 1H), 2.09-2.03 (m, 1H), 1.20 (s, 9H), 1.10 (d, *J* = 6.8 Hz, 3H), 1.01 (d, *J* = 6.7 Hz, 3H); <sup>13</sup>C NMR (125 MHz, CDCl<sub>3</sub>): δ 159.4, 155.8, 143.4, 132.9, 130.5, 129.6,

128.5, 127.5, 126.5, 126.1, 125.6, 123.8, 122.5, 121.9, 78.7, 55.6, 38.1, 31.7, 28.1, 19.4, 18.1. HRMS (ESI) for C<sub>23</sub>H<sub>29</sub>N<sub>2</sub>O<sub>2</sub> [M+H]<sup>+</sup>: calcd 365.2224, found 365.2226.

Chiral HPLC Charts for **4zd**:

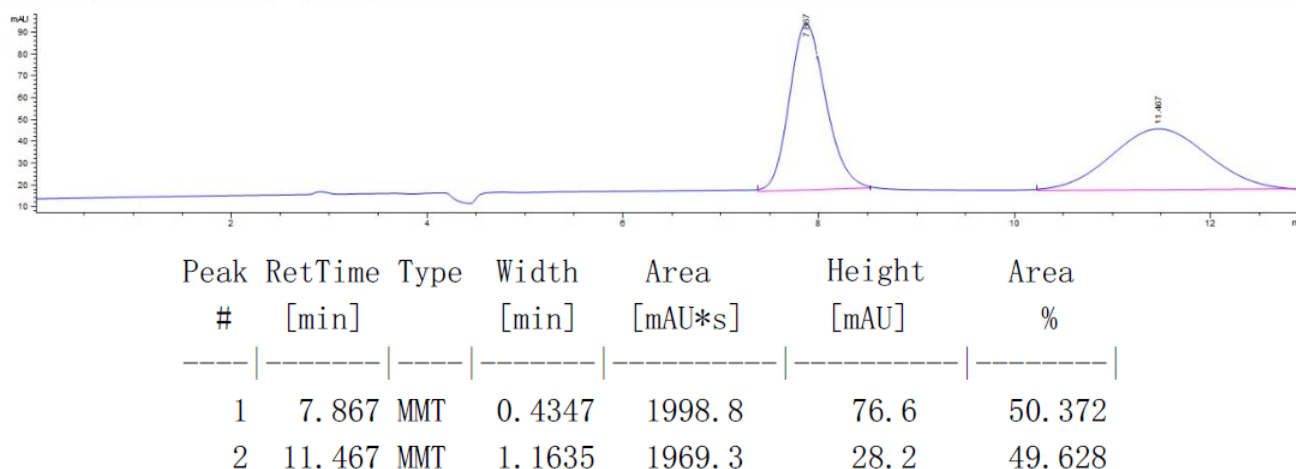

**Figure S25.** The HPLC chart of rac-**4zd**

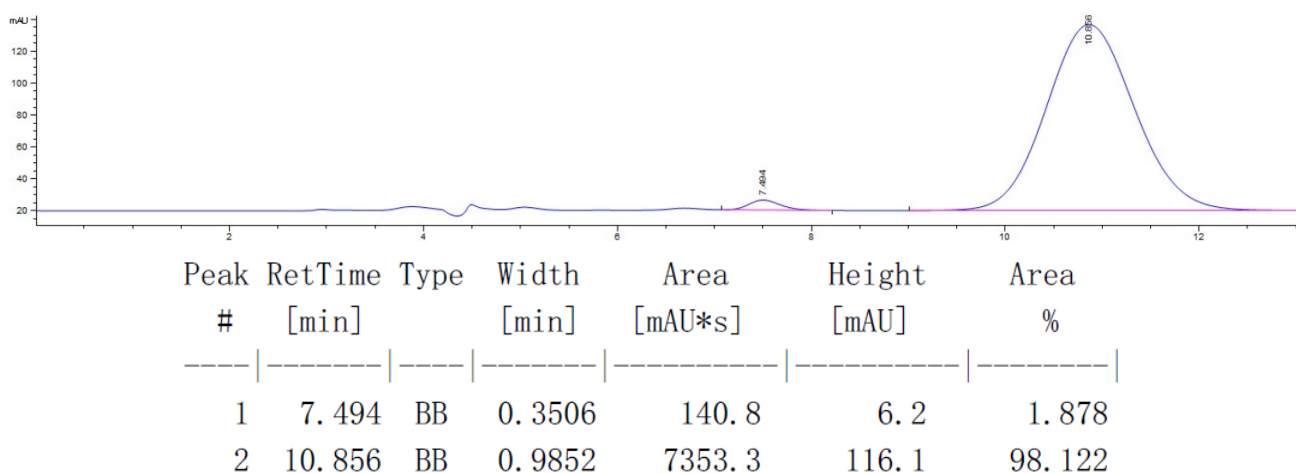

**Figure S26.** The HPLC chart of **4zd**

**tert-butyl (S)-(1-(phenanthridin-6-yl)propan-2-yl)carbamate (4ze)**

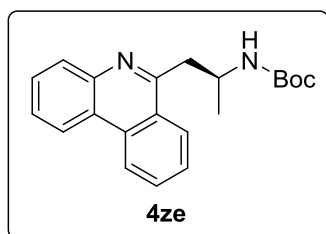

**4ze** was isolated via column chromatography (eluent: DCM to PE/EA = 5/1) as white solid (89.6 mg, 89%, 93% *ee*). Mp: 155-157 °C. Enantiomeric excess was established by HPLC analysis by using a Daicel Chiralpak ID column, *ee* = 93 % (HPLC: 210 nm, *n*-Hexane/isopropanol = 90/10, flow rate 0.5 mL/min, 30 °C, *t<sub>r</sub>* (major) = 14.398 min, *t<sub>r</sub>* (minor) = 12.758 min).

[α]<sub>D</sub><sup>25</sup> = +22.4 (c 1.0, CH<sub>2</sub>Cl<sub>2</sub>). <sup>1</sup>H NMR (500 MHz, CDCl<sub>3</sub>): δ 8.65 (d, *J* = 8.5 Hz, 1H), 8.56 (d, *J* = 8.0 Hz, 1H), 8.42 (d, *J* = 5.5 Hz, 1H), 8.14 (dd, *J*<sub>1</sub> = 8.1 Hz, *J*<sub>2</sub> = 0.9 Hz, 1H), 7.87-7.84 (m, 1H), 7.75-7.71 (m, 2H), 7.66-7.63 (m, 1H), 5.29 (d, *J* = 13.6 Hz, 1H), 4.34 (d, *J* = 6.0 Hz, 1H), 3.74-3.69 (m, 1H), 3.40 (dd, *J*<sub>1</sub> = 13.9 Hz, *J*<sub>2</sub> = 7.0 Hz, 1H), 1.37 (s, 9H), 1.29 (d, *J* = 6.6 Hz, 3H); <sup>13</sup>C NMR (125 MHz, CDCl<sub>3</sub>): δ 159.1, 155.4, 143.4, 132.9, 130.5, 129.7, 128.6, 127.6, 126.6, 126.4, 125.7, 123.7,

122.4, 121.9, 79.0, 46.5, 42.4, 28.3, 20.7. HRMS (ESI) for C<sub>23</sub>H<sub>28</sub>N [M+H]<sup>+</sup>: calcd 337.1911, found 337.1907.

Chiral HPLC Charts for **4ze**:

VWD1 A, Wavelength=254 nm (ZLMZLM 2021-06-17 12-11-40\001-P1-B1-ZLM-B-DL.D)

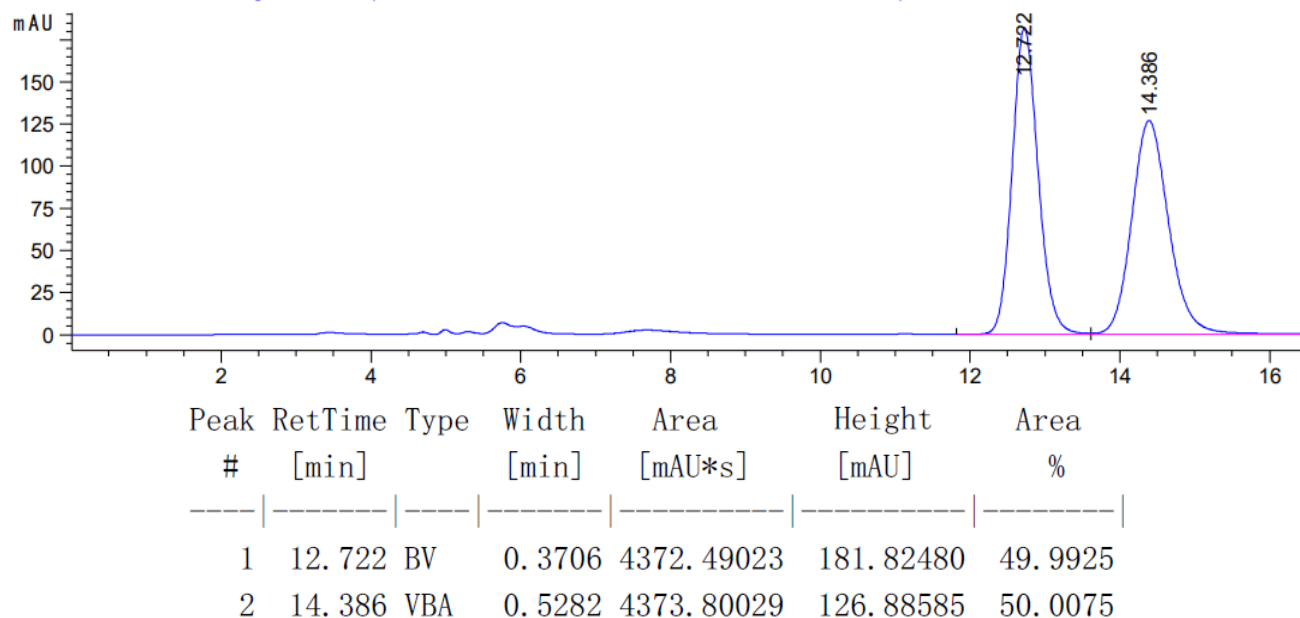

**Figure S27.** The HPLC chart of rac-**4ze**

VWD1 A, Wavelength=254 nm (ZLMZLM 2021-06-17 12-32-30\001-P1-B2-ZLM-B-L.D)

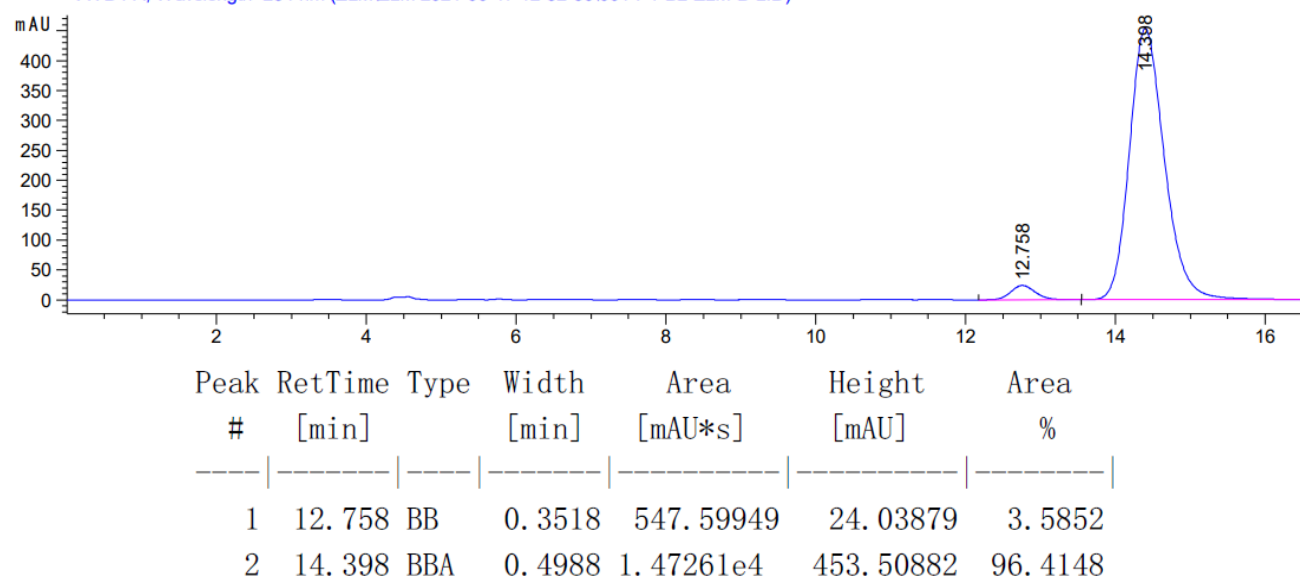

**Figure S28.** The HPLC chart of **4ze**

**tert-butyl (S)-(1-(phenanthridin-6-yl)-3-phenylpropan-2-yl)carbamate (4zf)**

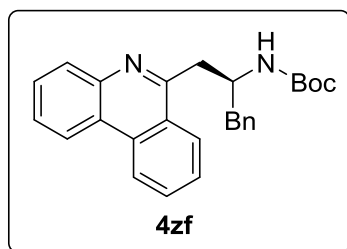

**4zf** was isolated via column chromatography (eluent: DCM to PE/EA = 5/1) as white solid (93.5 mg, 76%). Mp: 139-141°C. Enantiomeric excess was established by HPLC analysis by using a Daicel Chiralpak ID column, *ee* = 93 % (HPLC: 210 nm, *n*-Hexane/isopropanol = 90/10, flow rate 0.5 mL/min, 30 °C, *t<sub>r</sub>* (major) = 13.998 min, *t<sub>r</sub>* (min) = 12.732 min).  $[\alpha]_D^{25} = +19.5$  (c 1.0, CH<sub>2</sub>Cl<sub>2</sub>). **<sup>1</sup>H NMR** (500 MHz, CDCl<sub>3</sub>): δ 8.63 (d, *J* = 8 Hz, 1H), 8.55 (d, *J* = 8 Hz, 1H), 8.17 (d, *J* = 8.5 Hz, 1H), 8.07 (d, *J* = 7Hz, 1H), 7.82 (t, *J* = 7.5 Hz, 1H), 7.76-7.72 (m, 1H), 7.67-7.62 (m, 2H), 7.33-7.24 (m, 5H), 5.58 (s, 1H), 4.52 (s, 1H), 3.58-3.54 (m, 1H), 3.49-3.45 (m, 1H), 3.18-3.16 (m, 1H), 3.03-2.99 (m, 1H), 1.34 (s, 9H); **<sup>13</sup>C NMR** (125 MHz, CDCl<sub>3</sub>): δ 159.0, 155.5, 143.4, 138.6, 132.8, 130.5, 129.7, 129.6, 128.6, 128.4, 127.5, 126.6, 126.4, 126.1, 125.6, 123.7, 122.4, 122.0, 79.0, 51.7, 40.7, 38.7, 28.3. HRMS (ESI) for C<sub>27</sub>H<sub>29</sub>N<sub>2</sub>O<sub>2</sub> [M+H]<sup>+</sup>: calcd 413.2224, found 413.2223.

**Chiral HPLC Charts for 4zf:**

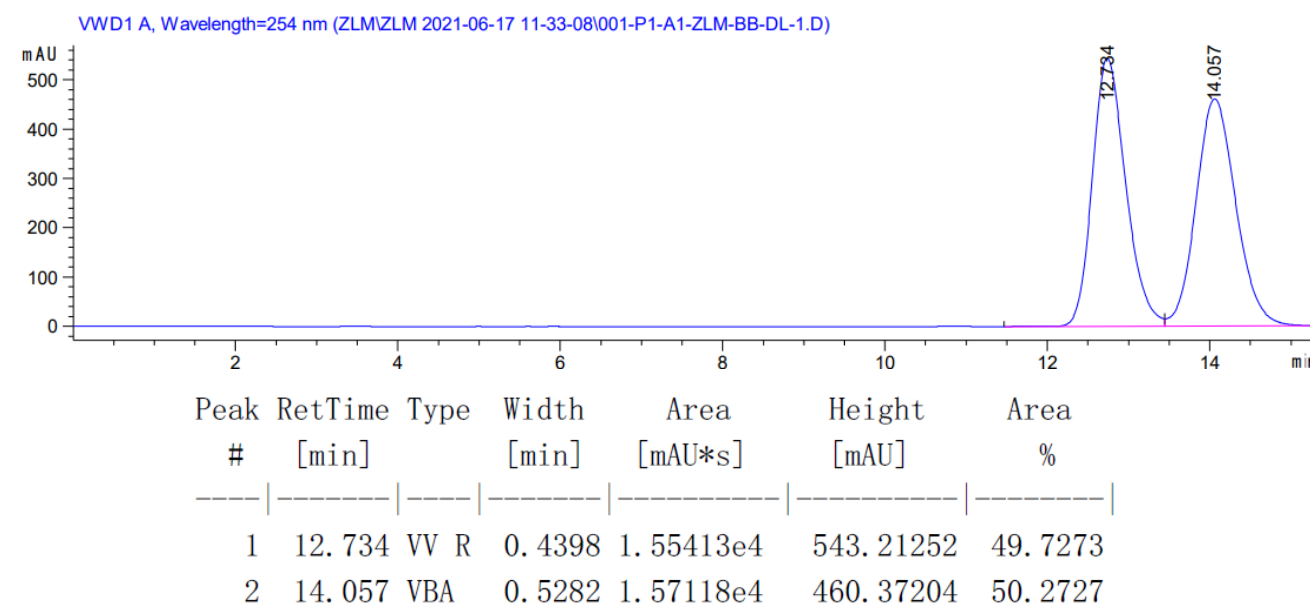

**Figure S29.** The HPLC chart of rac-4zf

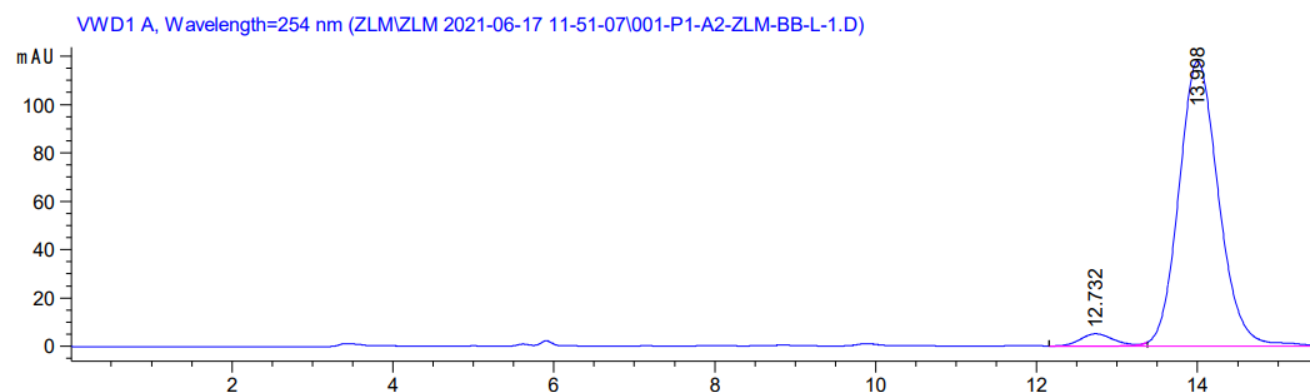

| Peak # | RetTime [min] | Type | Width [min] | Area [mAU*s] | Height [mAU] | Area %  |
|--------|---------------|------|-------------|--------------|--------------|---------|
| 1      | 12.732        | BV E | 0.4365      | 142.64622    | 5.03466      | 3.4138  |
| 2      | 13.998        | VB R | 0.5297      | 4035.92822   | 117.80275    | 96.5862 |

**Figure S30.** The HPLC chart of **4zf**

**tert-butyl (S)-(4-methyl-1-(phenanthridin-6-yl)pentan-2-yl)carbamate (4zg):**

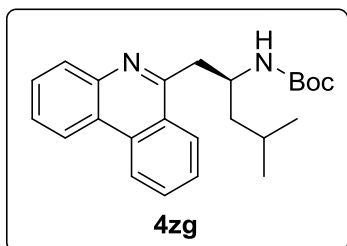

**4zg** was isolated via column chromatography (eluent: DCM to PE/EA = 5/1) as white solid (86.3 mg, 76%). Mp: 122-124 °C. Enantiomeric excess was established by HPLC analysis by using a Daicel Chiralpak ID column, *ee* = 94 % (HPLC: 210 nm, *n*-Hexane/isopropanol = 90/10, flow rate 0.5 mL/min, 30 °C, *t<sub>r</sub>* (major) = 9.076 min, *t<sub>r</sub>* (minor) = 6.309 min).

$[\alpha]_D^{25} = +41.0$  (c 1.0, CH<sub>2</sub>Cl<sub>2</sub>). **<sup>1</sup>H NMR** (500 MHz, CDCl<sub>3</sub>) δ 8.65 (d, *J* = 8 Hz, 1H), 8.56 (d, *J* = 8 Hz, 1H), 8.40 (d, *J* = 7 Hz, 1H), 8.14 (dd, *J*<sub>1</sub> = 8.1 Hz, *J*<sub>2</sub> = 0.8 Hz, 1H), 7.86-7.83 (m, 1H), 7.75-7.71 (m, 2H), 7.66-7.63 (m, 1H), 5.18 (d, *J* = 6.5 Hz, 1H), 4.35 (d, *J* = 4 Hz, 1H), 3.61-3.58 (m, 1H), 3.51-3.47 (m, 1H), 1.75 (d, *J* = 5.5 Hz, 1H), 1.62-1.57 (m, 1H), 1.49-1.43 (m, 1H), 1.32 (s, 9H), 0.93 (d, *J* = 7 Hz, 3H), 0.87 (d, *J* = 6.5 Hz, 3H); **<sup>13</sup>C NMR** (125 MHz, CDCl<sub>3</sub>): δ 159.2, 155.6, 143.5, 132.8, 130.4, 129.8, 128.5, 127.5, 126.5, 126.3, 125.8, 123.7, 122.4, 121.9, 78.8, 48.7, 44.1, 41.3, 28.3, 25.1, 23.2, 22.1. HRMS (ESI) for C<sub>24</sub>H<sub>31</sub>N<sub>2</sub>O<sub>2</sub> [M+H]<sup>+</sup>: calcd 379.2380, found 379.2383.

**Chiral HPLC Charts for 4zg:**

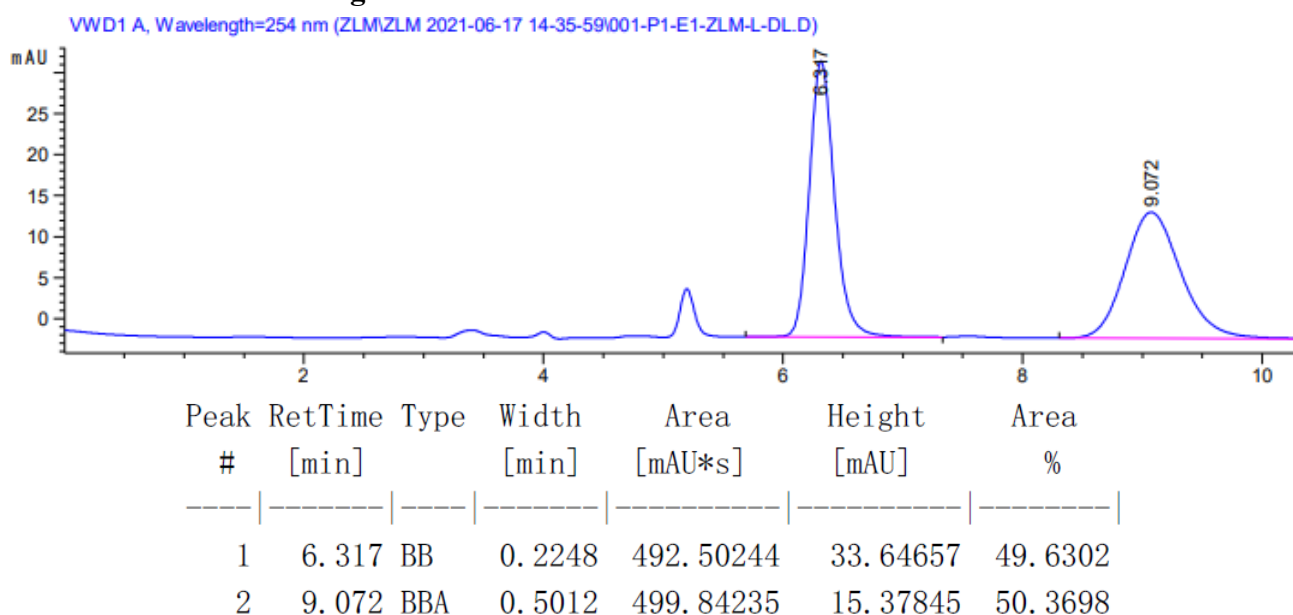

**Figure S31.** The HPLC chart of rac-**4zg**



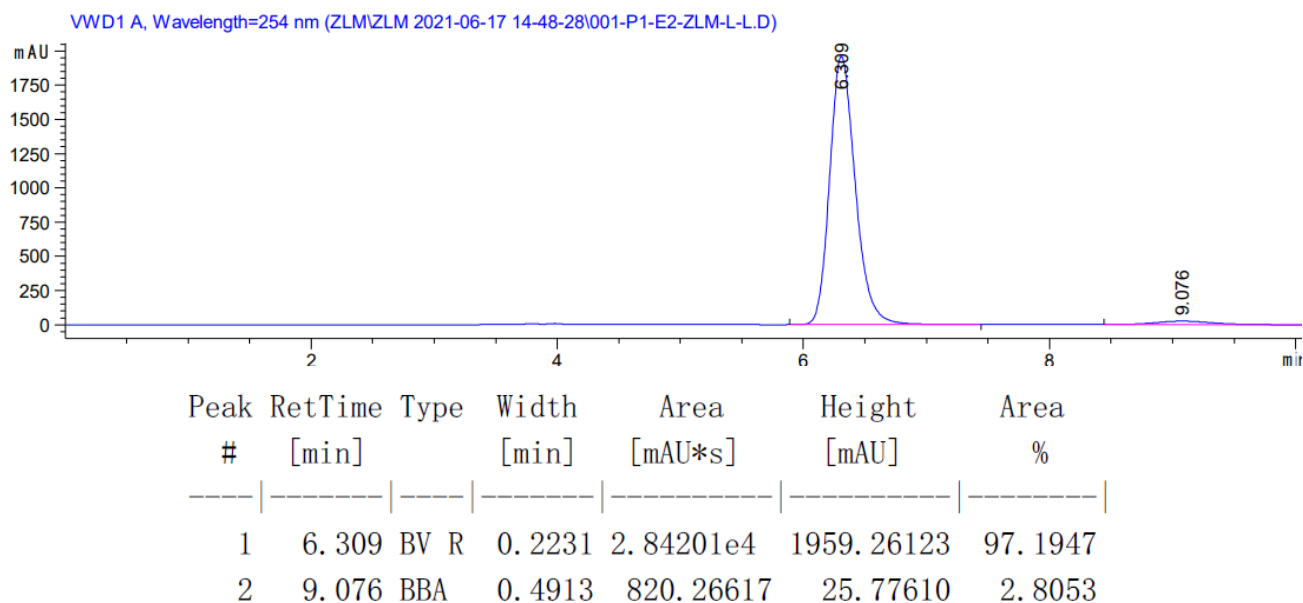

**Figure S32.** The HPLC chart of **4zg**

***tert*-butyl (*R*)-3-(phenanthridin-6-ylmethyl)piperidine-1-carboxylate (**4zh**)**

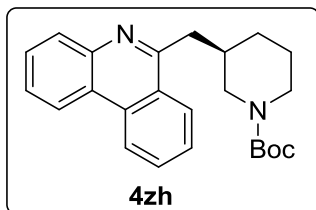

**4zh** was isolated via column chromatography (eluent: DCM to PE/EA = 5/1) as colorless liquid (80.0 mg, 71%, 91% *ee*). Enantiomeric excess was established by HPLC analysis by using a Daicel Chiralpak ID column, *ee* = 91 % (HPLC: 210 nm, *n*-Hexane/isopropanol = 90/10, flow rate 0.5 mL/min, 30 °C,  $t_r$  (major) = 17.14 min,  $t_r$  (minor) = 10.82 min).  $[\alpha]_D^{25} = +34.6$

(*c* 1.0, CH<sub>2</sub>Cl<sub>2</sub>). <sup>1</sup>H NMR (500 MHz, CDCl<sub>3</sub>): δ 8.65 (d, *J* = 8.3 Hz, 1H), 8.55 (d, *J* = 8.1 Hz, 1H), 8.24 (d, *J* = 8.2 Hz, 1H), 8.13 (d, *J* = 8.1 Hz, 1H), 7.84 (t, *J* = 7.6 Hz, 1H), 4.19-3.94 (m, 2H), 3.35-2.23 (m, 2H), 2.84-2.79 (m, 2H), 2.28 (s, 1H), 2.04 (s, 1H), 1.84 (s, 1H), 1.65 (s, 1H), 1.47-1.34 (m, 10H); <sup>13</sup>C NMR (125 MHz, CDCl<sub>3</sub>): δ 159.9, 154.9, 143.6, 132.9, 130.3, 129.7, 128.6, 127.3, 126.4, 126.2, 125.5, 123.6, 122.5, 121.9, 79.2, 50.1, 44.4, 39.5, 36.1, 31.1, 28.3, 24.9. HRMS (ESI) for C<sub>24</sub>H<sub>29</sub>N<sub>2</sub>O<sub>2</sub> [M+H]<sup>+</sup>: calcd 377.2224, found 377.2225.

Chiral HPLC Charts for **4zh**:

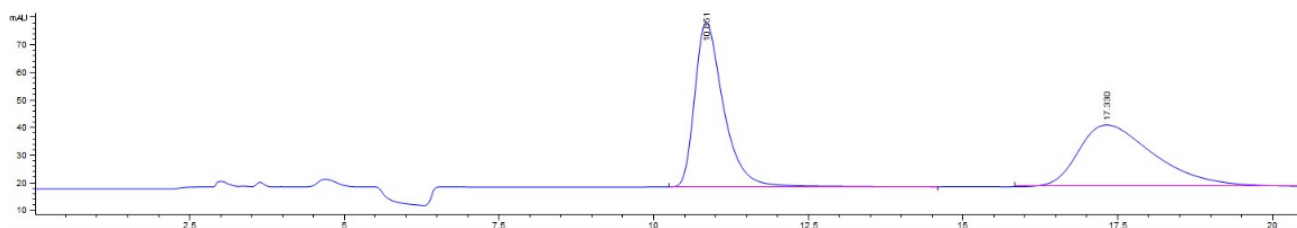

| Peak # | RetTime [min] | Type | Width [min] | Area [mAU*s] | Height [mAU] | Area % |
|--------|---------------|------|-------------|--------------|--------------|--------|
| 1      | 10.85         | BB   | 0.4887      | 1934.6       | 59.6         | 49.997 |
| 2      | 17.33         | BBA  | 1.2890      | 1934.9       | 22.4         | 50.003 |

**Figure S33.** The HPLC chart of rac-4zh

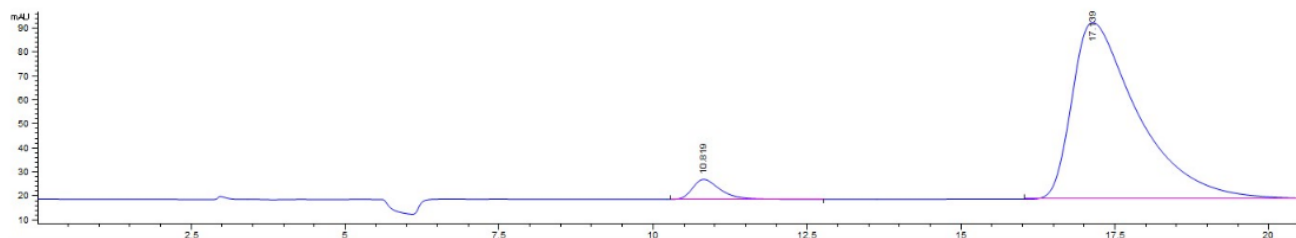

| Peak # | RetTime [min] | Type | Width [min] | Area [mAU*s] | Height [mAU] | Area % |
|--------|---------------|------|-------------|--------------|--------------|--------|
| 1      | 10.82         | BB   | 0.4754      | 264.3        | 8.3          | 4.548  |
| 2      | 17.14         | BBA  | 1.0951      | 5545.8       | 73.9         | 95.452 |

**Figure S34.** The HPLC chart of 4zh

### 3.4 3 mmol-scale synthesis of 4a

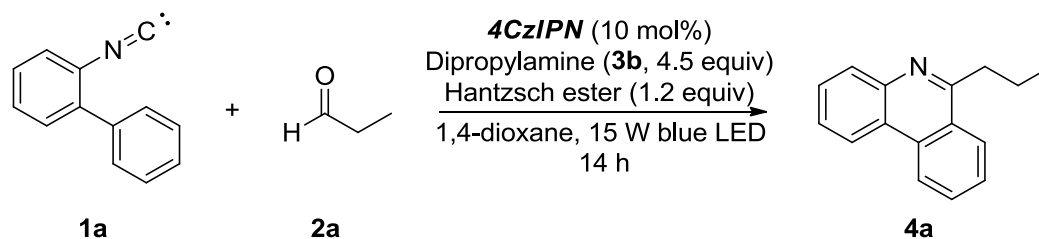

Procedure: To a flame-dried Schlenk tube was added **1a** (3 mmol, 538 mg), 4CzIPN (0.15 mmol, 118 mg) and Hantzsch ester (912 mg, 3.6 mmol). The tube was evacuated and refilled with N<sub>2</sub> for three times. A solution of aldehyde **2a** (13.5 mmol, 784 mg), amine **3b** (13.5 mmol, 1.37 g) in 1,4-dioxane (75.0 mL) was added under nitrogen atmosphere. The reaction mixture was irradiated at a distance of 3 cm from 15 W blue LED and stirred at 25 °C for 14 h. Upon completion, the reaction mixture was concentrated under vacuum and the residue was purified by column chromatography on silica gel (200-300 mesh), eluting with the indicated mixture of ethyl acetate (EA)/petroleum ether (PE) to give pure **4a** (484.7 mg, 73%).

## 4. Mechanistic Studies

### 4.1 Radical scavenging experiment.

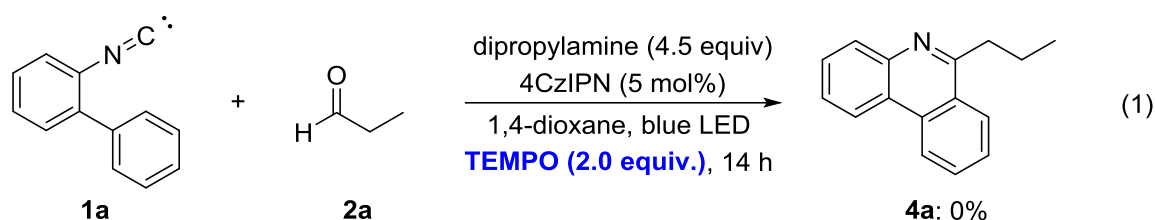

The procedure is similar as the one described in the model reaction of **1a** and **2a** under the standard reaction conditions except the addition of 2.0 equivalents of TEMPO. Radical-scavenging experiment indicated the reaction was completely suppressed when 2.0 equiv. TEMPO was added into the reaction mixture.

### 4.2 Formation and detection of intermediate **6** when the reaction time was shortened to 4 h.

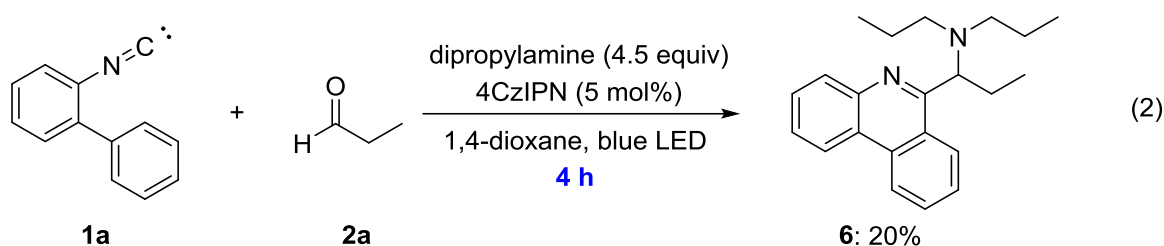

Characterization of **6**:

#### *N,N*-diethyl-1-(phenanthridin-6-yl)propan-1-amine (**6**)

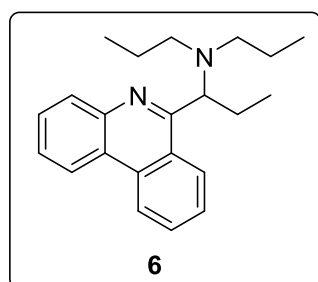

**6** was isolated via column chromatography (eluent: PE/EA = 10/1) as a colorless liquid (12.8 mg, 20%). <sup>1</sup>H NMR (400 MHz, CDCl<sub>3</sub>): δ 8.79 (d, *J* = 8.2 Hz, 1H), 8.66 (d, *J* = 8.3 Hz, 1H), 8.59 (d, *J* = 8.2 Hz, 1H), 8.22 (dd, *J*<sub>1</sub> = 8.1 Hz, *J*<sub>2</sub> = 1.4 Hz, 1H), 7.84-7.80 (m, 1H), 7.76-7.72 (m, 1H), 7.70-7.64 (m, 2H), 4.56 (dd, *J*<sub>1</sub> = 10.1 Hz, *J*<sub>2</sub> = 3.9 Hz, 1H), 2.72-2.61 (m, 4H), 2.56-2.45 (m, 1H), 2.12-2.01 (m, 1H), 1.53-1.39 (m, 4H), 0.87 (t, *J* = 7.3 Hz, 3H), 0.74 (t, *J* = 7.3 Hz, 6H); <sup>13</sup>C NMR (100 MHz, CDCl<sub>3</sub>): δ 160.8, 143.3, 133.0, 130.4, 129.8, 128.2, 127.3, 126.6, 126.4, 126.4, 123.8, 122.1, 121.8, 66.5, 53.4, 21.6, 20.1, 12.0, 11.8.

### 4.3 Probing experiment on possible reaction intermediate.

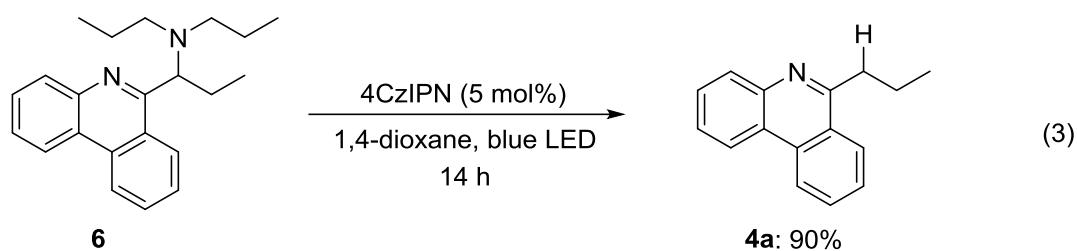

Procedure for the conversion of **6** to **4a**: To a 25 mL flame-dried Schlenk tube was added **6** (0.3 mmol), 4CzIPN (0.015 mmol). The tube was evacuated and refilled with N<sub>2</sub> for three times. 1,4-dioxane (7.5 mL) was added under nitrogen atmosphere. The reaction mixture was irradiated at a distance of 3 cm from 15 W blue LED and stirred at 25 °C for 14 h. Upon completion, the reaction mixture was concentrated under vacuum and the residue was purified by column chromatography on silica gel (200-300 mesh), eluting with the indicated mixture of ethyl acetate (EA)/petroleum ether (PE) to give **4a** (90%).

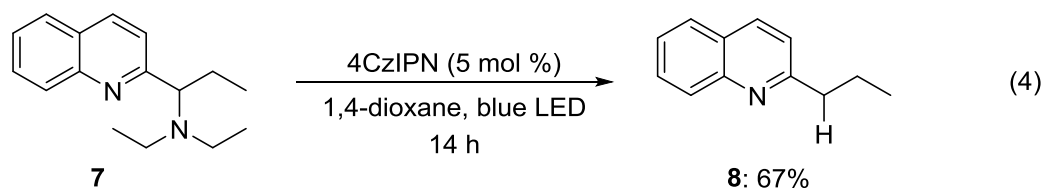

Procedure for the conversion of **7** to **8**: To a 25 mL flame-dried Schlenk tube was added **7** (0.3 mmol), 4CzIPN (0.015 mmol). The tube was evacuated and refilled with N<sub>2</sub> for three times. 1,4-dioxane (7.5 mL) was added under nitrogen atmosphere. The reaction mixture was irradiated at a distance of 3 cm from 15 W blue LED and stirred at 25 °C for 14 h. Upon completion, the reaction mixture was concentrated under vacuum and the residue was purified by column chromatography on silica gel (200-300 mesh), eluting with the indicated mixture of ethyl acetate (EA)/petroleum ether (PE) to give **8** (67%).

Characterization of **8**:

**2-propylquinoline (8):**

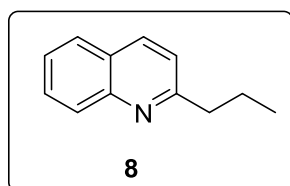

<sup>1</sup>H NMR (500 MHz, CDCl<sub>3</sub>): δ 8.08 (d, *J* = 8.4 Hz, 2H), 7.79 (d, *J* = 8.0 Hz, 1H), 7.70 (t, *J* = 8.4 Hz, 1H), 7.50 (t, *J* = 8.0 Hz, 1H), 7.31 (d, *J* = 8.4 Hz, 1H), 2.98 (t, *J* = 7.6 Hz, 2H), 1.92-1.83 (m, 2H), 1.04 (t, *J* = 7.2 Hz, 2H), 1.92-1.83 (m, 2H), 1.04 (t, *J* = 7.2 Hz, 3H); <sup>13</sup>C NMR (125 MHz, CDCl<sub>3</sub>) δ

162.9, 147.8, 136.3, 129.4, 128.8, 127.5, 126.7, 125.7, 121.4, 41.2, 23.3, 14.0. Its analytical data are

consistent with the documented data.<sup>21</sup>

#### 4.4 Detection of byproduct 4a'

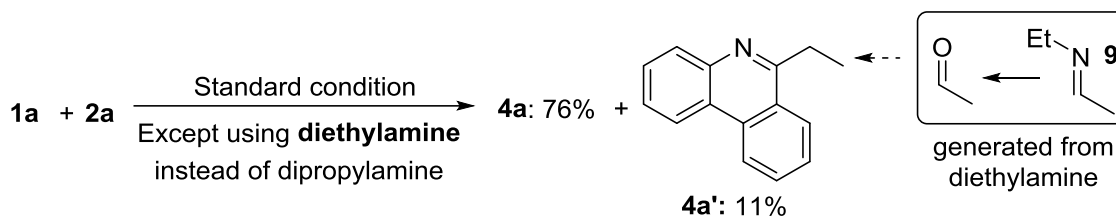

Characterization of  $4a'$  :

#### 6-ethylphenanthridine ( $4a'$ )

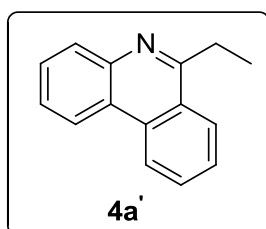

<sup>1</sup>H NMR (500 MHz, CDCl<sub>3</sub>) δ 8.68 (d, *J* = 8.3 Hz, 2H), 8.55 (d, *J* = 7.0 Hz, 1H), 8.27 (d, *J* = 8.1 Hz, 1H), 8.13 (dd, *J*<sub>1</sub> = 8.1 Hz, *J*<sub>2</sub> = 1.0 Hz, 1H), 7.85-7.82 (m, 1H), 7.73-7.68 (m, 2H), 7.64-7.60 (m, 1H), 3.42 (t, *J* = 7.6 Hz, 2H), 1.52 (t, *J* = 7.6 Hz, 3H). Its analytical data are consistent with the documented data.<sup>22</sup>

#### 4.5 KIE experiment.

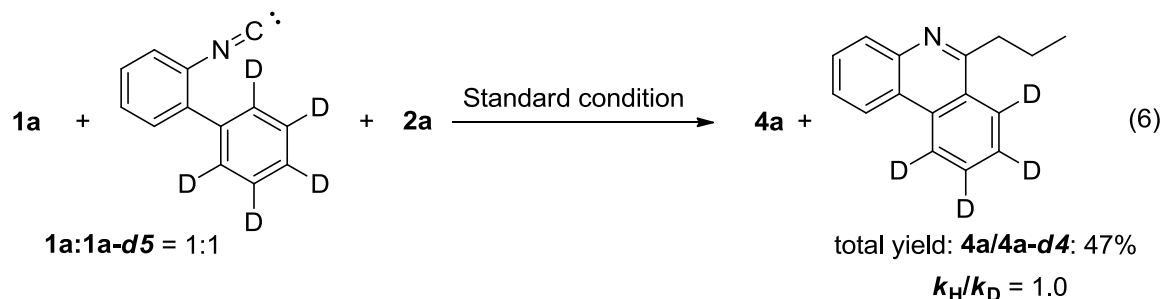

Procedure: To a 25 mL flame-dried Schlenk tube was added **1a** (26.9 mg, 0.15 mmol), **1a-d5** (27.6 mg, 0.15 mmol) 4CzIPN (11.8 mg, 0.015 mmol) and Hantzsch ester (91.2 mg, 0.36 mmol). The tube was evacuated and refilled with N<sub>2</sub> for three times. A solution of aldehyde **2a** (78.3 mg, 1.35 mmol), amine **3b** (136.0 mg, 1.35 mmol) in 1,4-dioxane (7.5 mL) was added under nitrogen atmosphere. The reaction mixture was irradiated at a distance of 3 cm from 15 W blue LED and stirred at 25 °C for 14 h. Upon completion, the reaction mixture was concentrated under vacuum and the residue was purified by column chromatography on silica gel (200-300 mesh), eluting with the indicated mixture of ethyl acetate (EA)/petroleum ether (PE) to give pure **4a** and **4a-d4** (31.4 mg, 47%). The *k<sub>H</sub>/k<sub>D</sub>* was calculated to be 1.0 according to the analysis of <sup>1</sup>H NMR spectrum of **4a** and **4a-d4**.

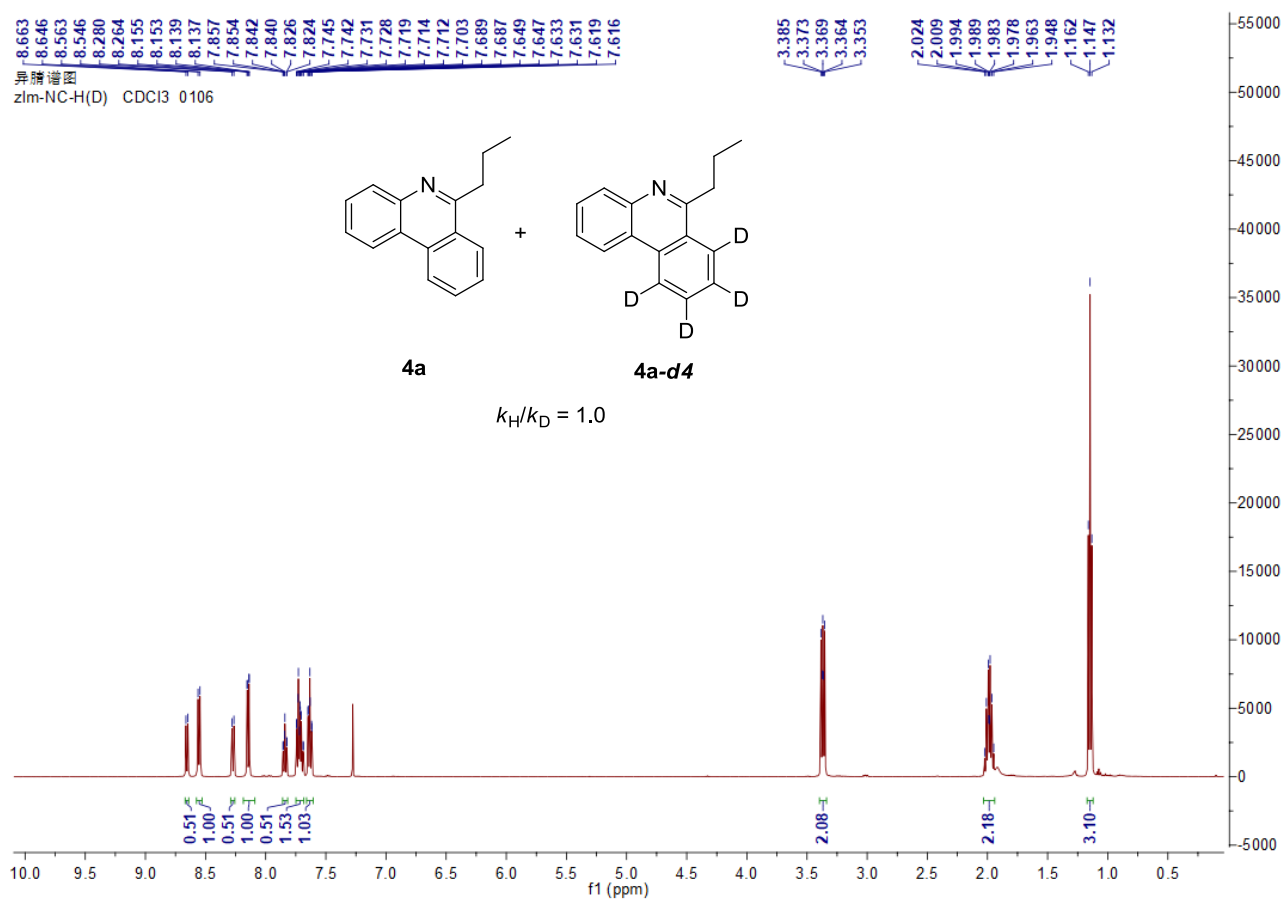

Figure S35.  $^1\text{H}$  NMR spectrum of **4a** and **4a-d4** for KIE experiments.

#### 4.6 Deuterium-labeling experiments

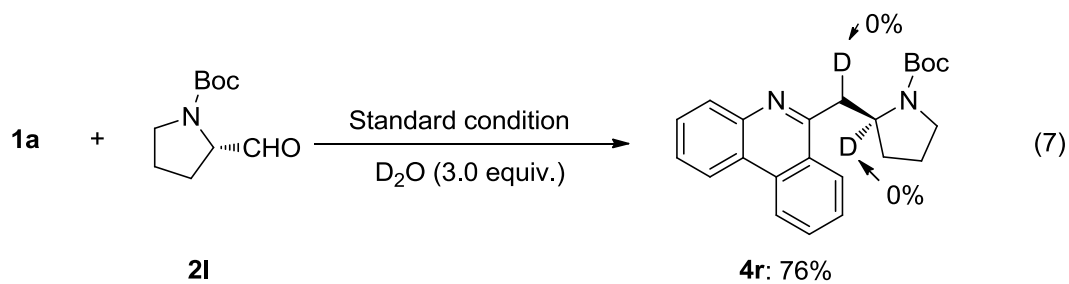

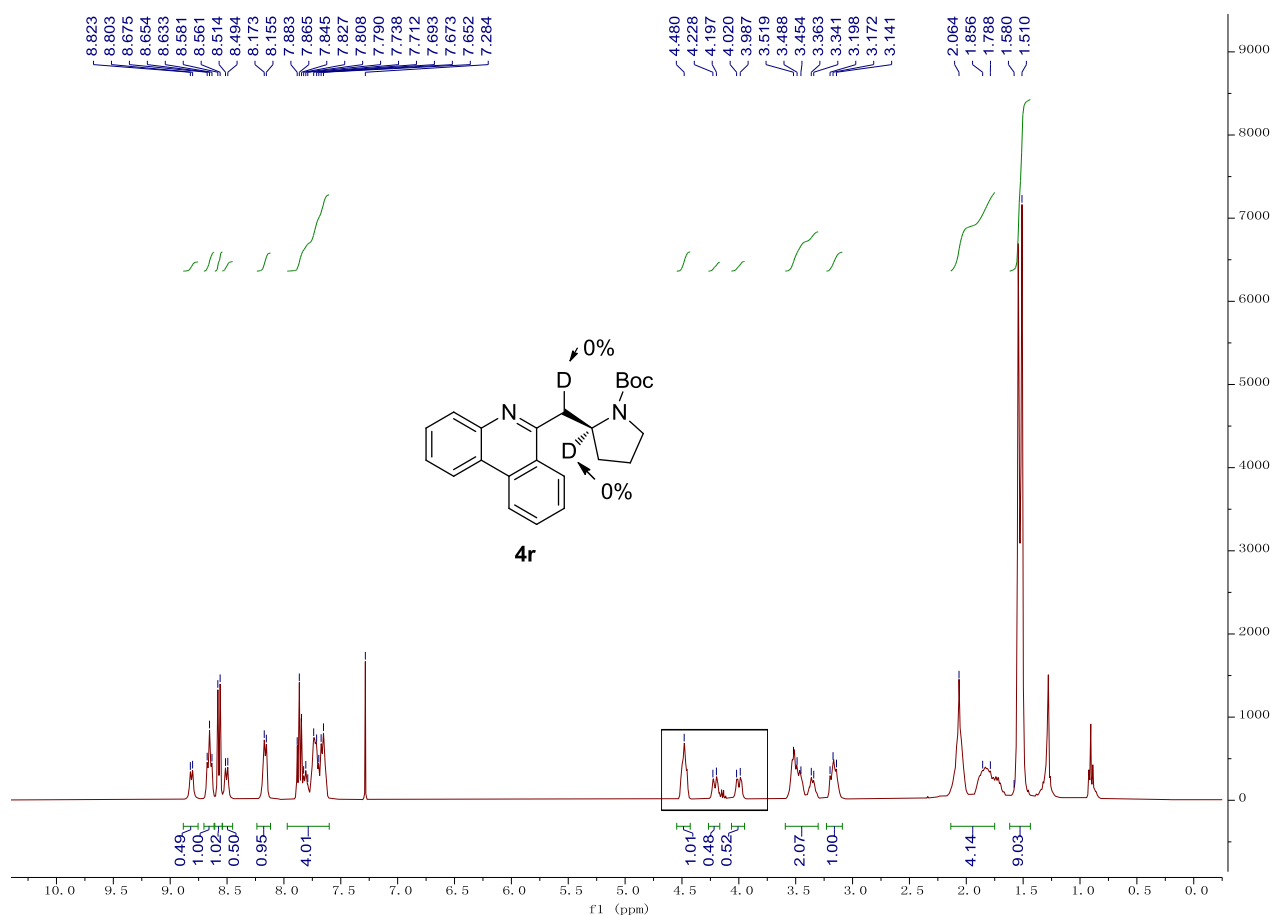

**Figure S36.**  $^1\text{H}$  NMR spectrum for Deuterium-labeling experiments.

## 5. References

1. M. Tobisu, K. Koh, T. Furukawa and N. Chatani, *Angew. Chem. Int. Ed.*, 2012, **51**, 11363-11366.
2. J. Rong, L. Deng, P. Tan, C. Ni, Y. Gu and J. Hu, *Angew. Chem. Int. Ed.*, 2016, **55**, 2743-2747.
3. Q. Li, C.-Y. Zhou and C. Wang, *Org. Lett.*, 2022, **24**, 7654-7658.
4. P. López-Mendoza and L. D. Miranda, *Org. Biomol. Chem.*, 2020, **18**, 3487-3491.
5. Y. Liu, X.-L. Chen, X. -Y. Li, S.-S. Zhu, S.-J. Li, Y. Song, L.-B. Qu and B. Yu, *J. Am. Chem. Soc.*, 2021, **143**, 964-972.
6. Q. Wang, X. Dong, T. Xiao and L. Zhou, *Org. Lett.*, 2013, **15**, 4846-4849.
7. X. Tang, S. Song, C. Liu, R. Zhu and B. Zhang, *RSC Adv.*, 2015, **5**, 76363-76367.
8. A. García-Urricelqui, A. de Cózar, A. Mielgo and C. Palomo, *Chem. Eur. J.*, 2021, **27**, 2483-2492.
9. S. Jung, N. Fuchs, P. Johe, A. Wagner, E. Diehl, T. Yuliani, C. Zimmer, F. Barthels, R. A. Zimmermann, P. Klein, W. Waigel, J. Meyr, T. Opatz, S. Tenzer, U. Distler, H.-J. Räder, C. Kersten, B.

- Engels, U. A. Hellmich, J. Klein and T. Schirmeister, *J. Med. Chem.*, 2021, **64**, 12322-12358.
10. E. Brenner, R. M. Baldwin and G. Tamagnan, *Org. Lett.*, 2005, **7**, 937-939.
11. H. Guan, Q. Zhang, P. J. Walsh, J. Mao, *Angew. Chem. Int. Ed.*, 2020, **59**, 5172-5177.
12. T. Gerfaud, L. Neuville and J. Zhu, *Angew. Chem. Int. Ed.*, 2009, **48**, 572-577.
13. Z. Yang, F. Chen, S. Zhang, Y. He, N. Yang and Q.-H. Fan, *Org. Lett.*, 2017, **19**, 1458-1461.
14. A. Kishi, K. Moriyama and H. Togo, *J. Org. Chem.*, 2018, **83**, 11080-11088.
15. C. Tang, Y. Yuan and N. Jiao, *Org. Lett.*, 2015, **17**, 2206-2209.
16. B. K. Mehta, K. Yanagisawa, M. Shiro and H. Kotsuki, *Org. Lett.*, 2003, **5**, 1605-1608.
17. Y. Jaiswal, Y. Kumar, J. Pal, R. Subramanian and A. Kumar, *Chem. Commun.*, 2018, **54**, 7207-7210.
18. X.-Y. Zhang, W.-Z. Weng, H. Liang, H. Yang and B. Zhang, *Org. Lett.*, 2018, **20**, 4686-4690.
19. J.-C. Yang, J.-Y. Zhang, J.-J. Zhang, X.-H. Duan and L.-N. Guo, *J. Org. Chem.*, 2018, **83**, 1598-1605.
20. (a) T. Xiao, L. Li and L. Zhou, *J. Org. Chem.*, 2016, **81**, 7908-7916; (b) J. Qin, Z. Zhou, T. Cui, M. Hemming and E. Meggers, *Chem. Sci.*, 2019, **10**, 3202-3207.
21. Q. Wu, S. Han, X. Ren, H. Lu, J. Li, D. Zou, Y. Wu and Y. Wu, *Org. Lett.*, 2018, **20**, 6345-6348.
22. D.-S. Li, T. Liu, Y. Hong, C.-L. Cao, J. Wu and H.-P. Deng, *ACS Catal.*, 2022, **12**, 4473-4480.



## 6. Copies of $^1\text{H}$ and $^{13}\text{C}$ NMR spectra

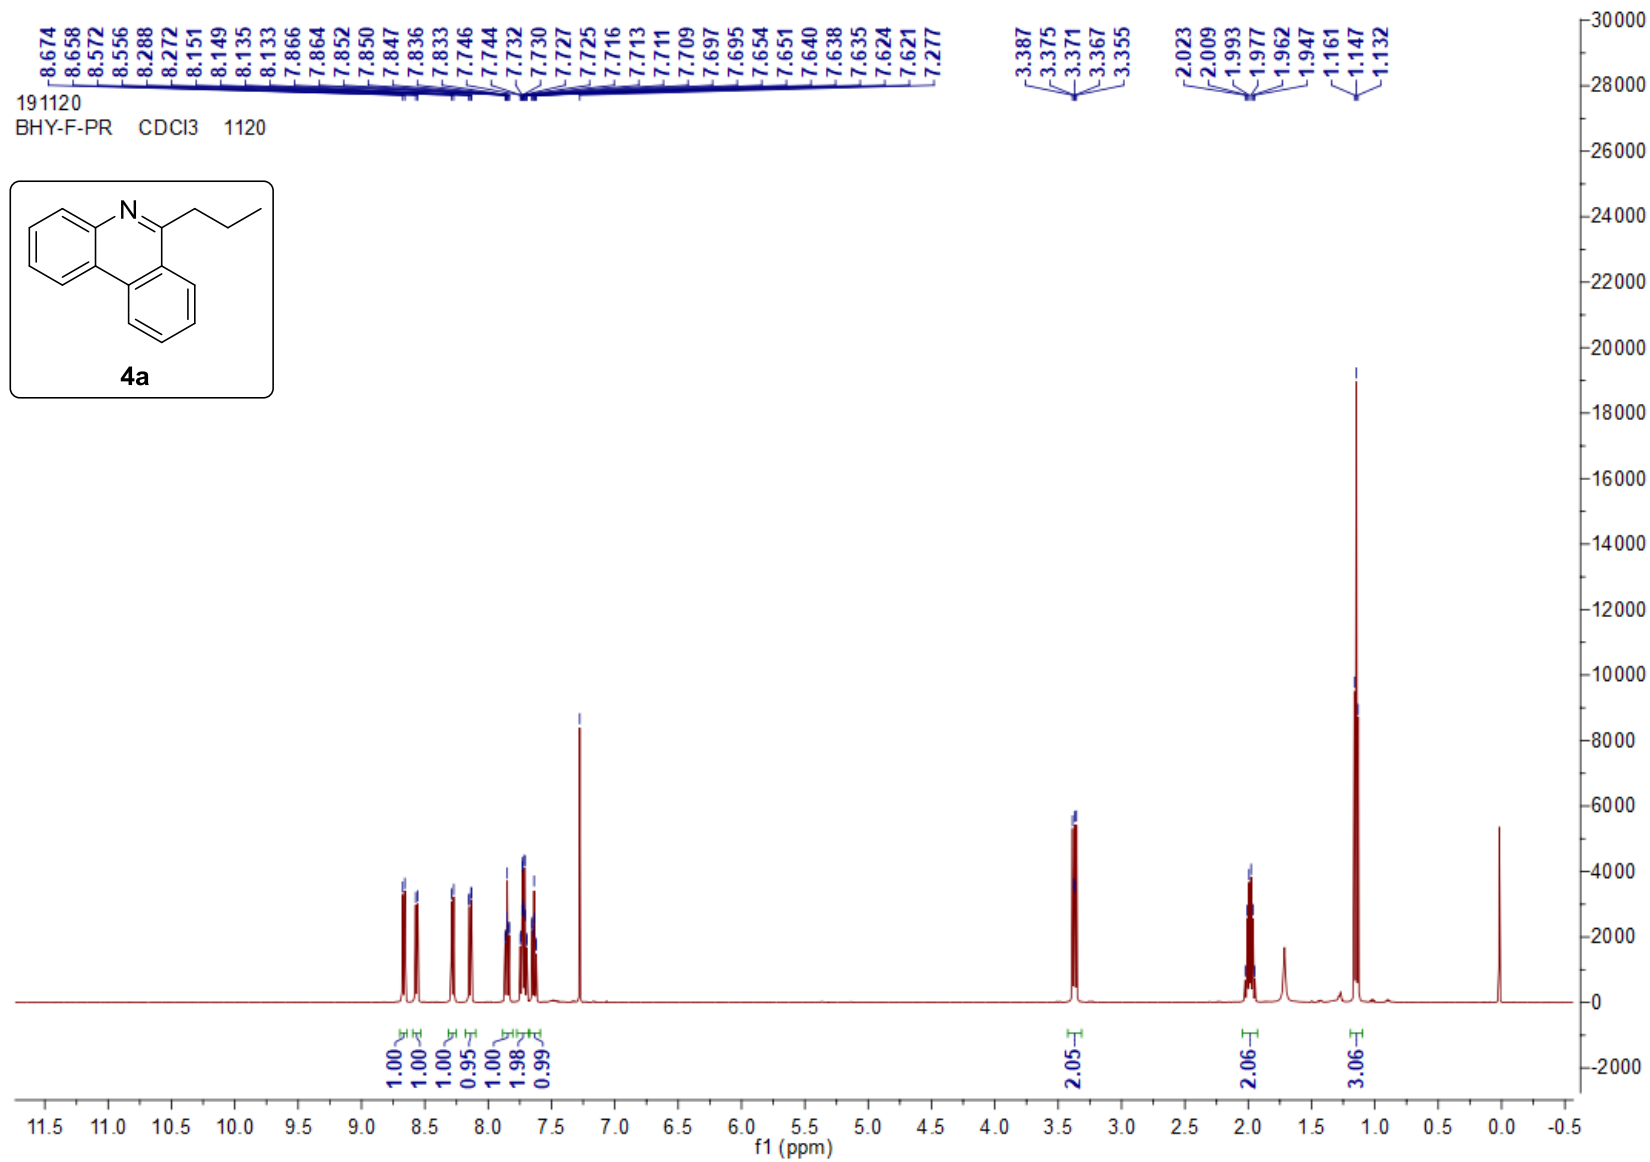

200521  
BHY-F-Pr CDCL3 0521

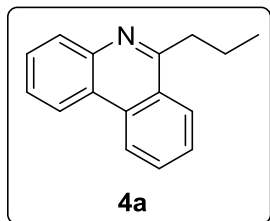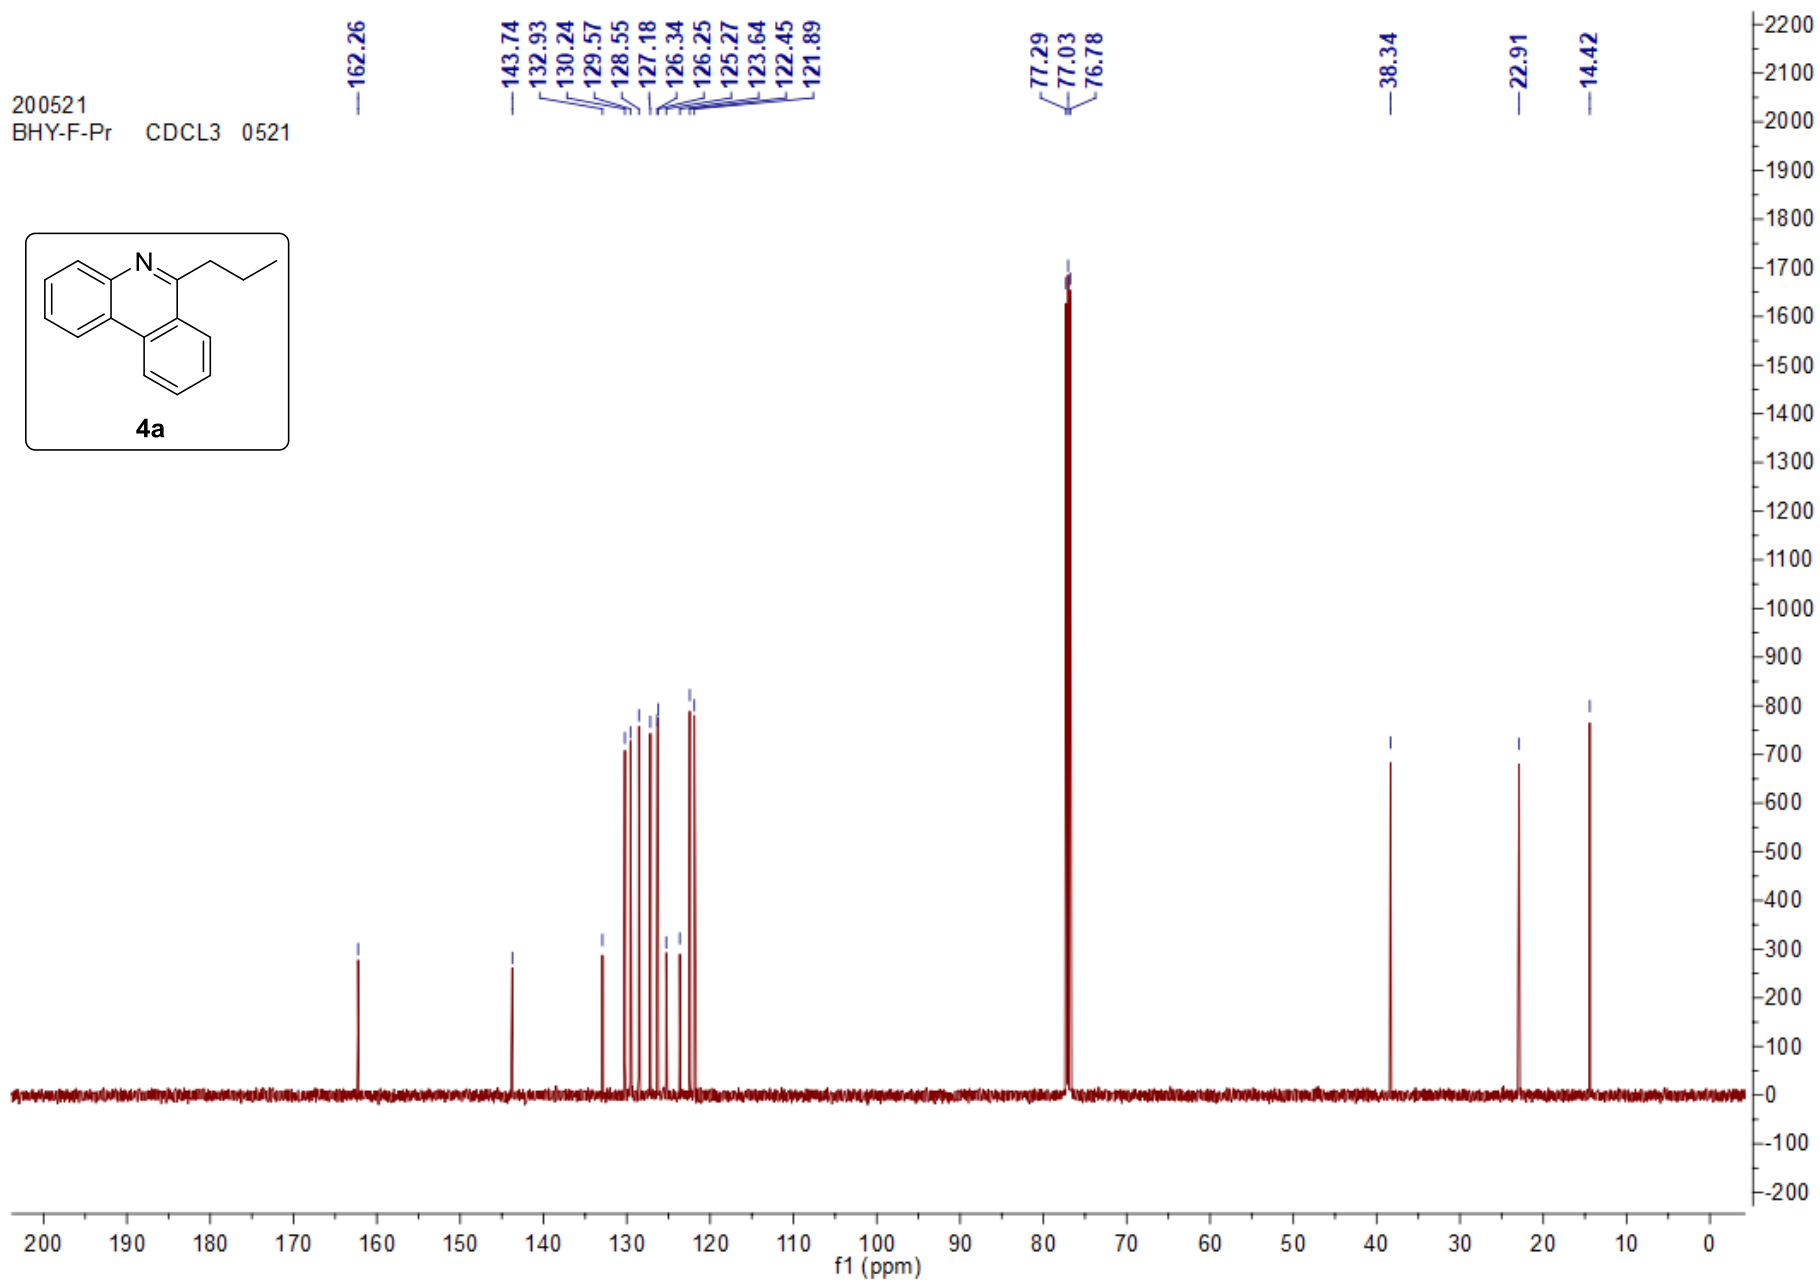

LYK-B3

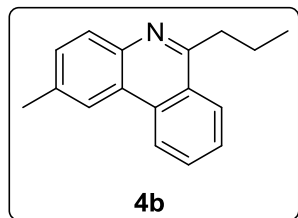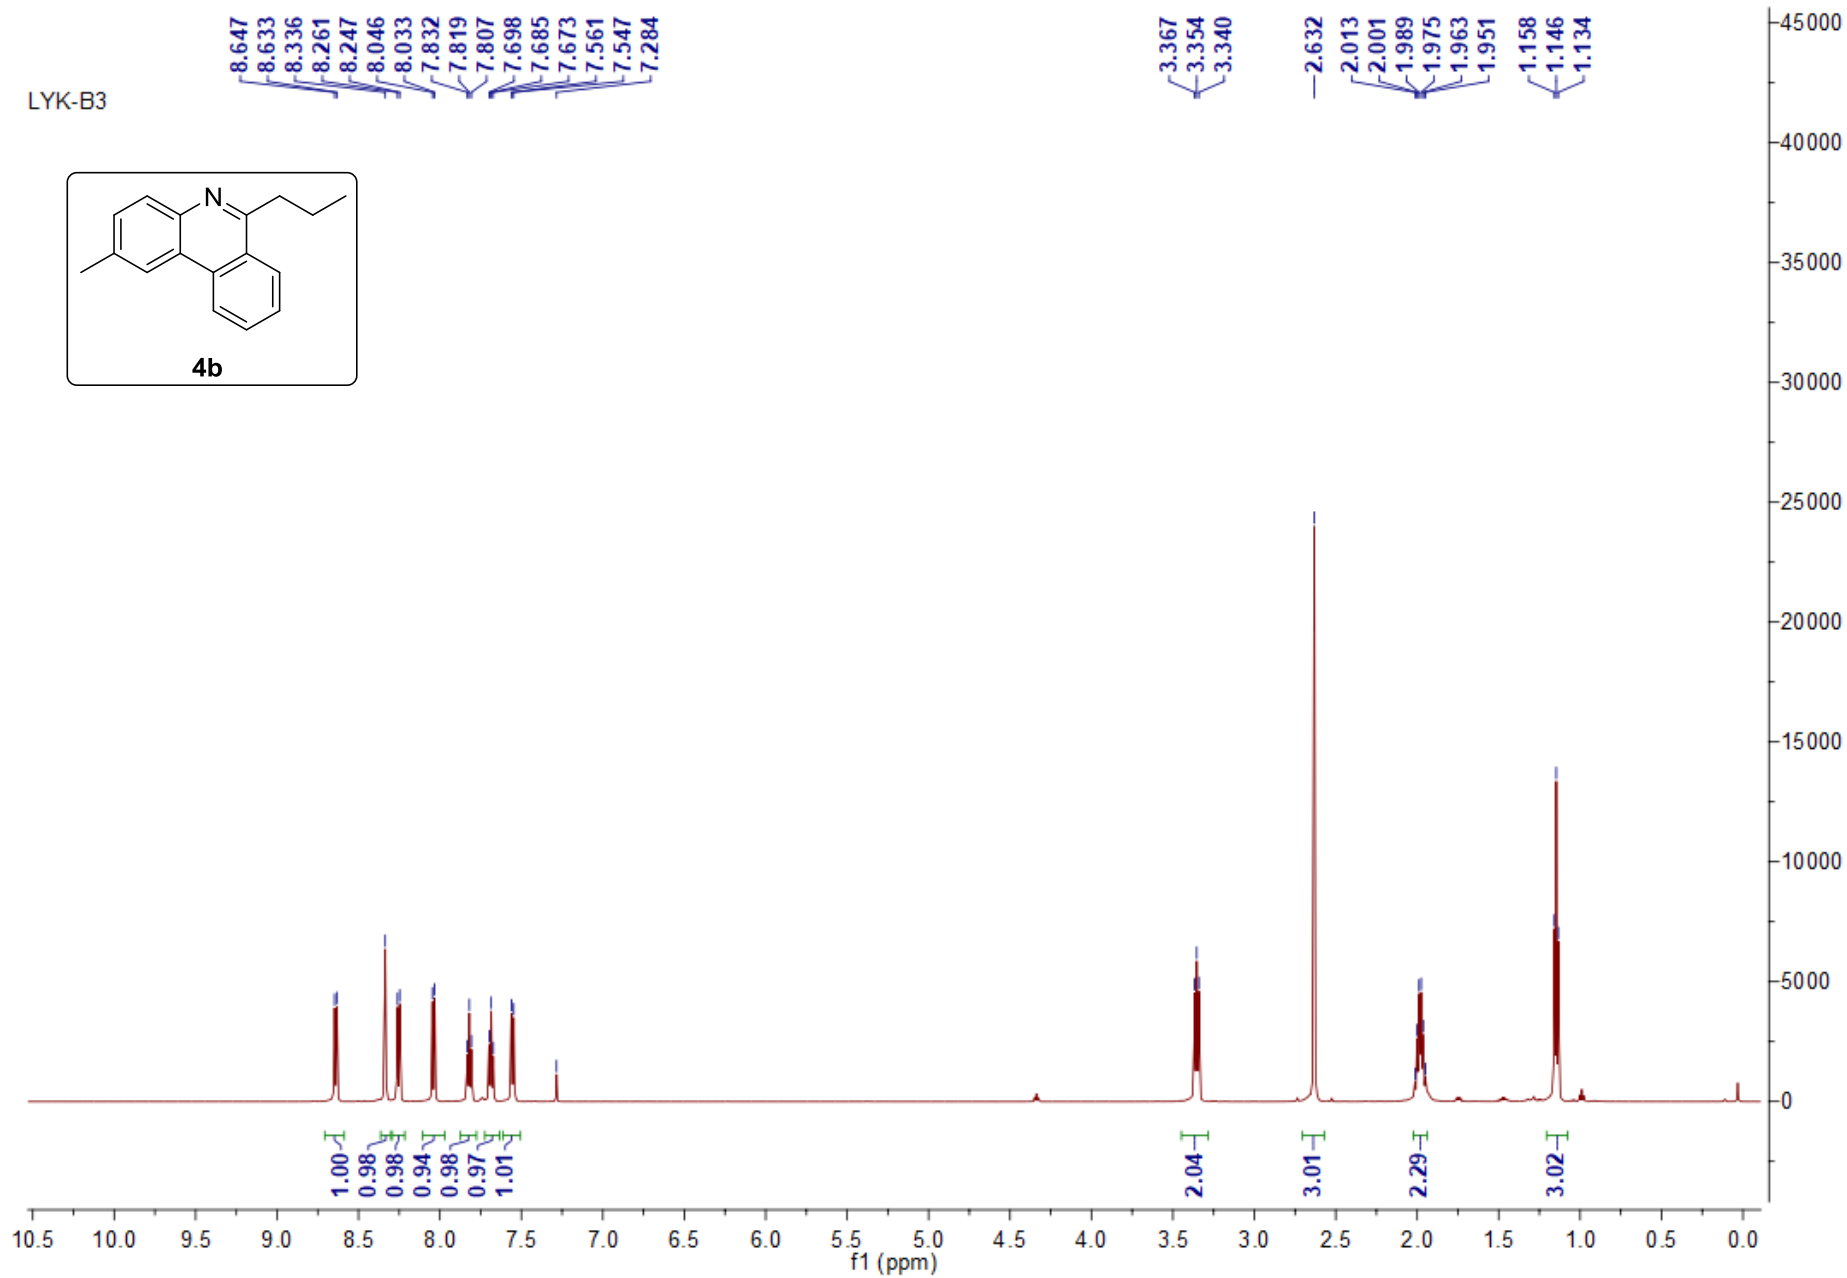

LYK-B3

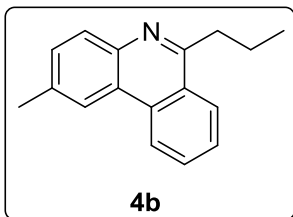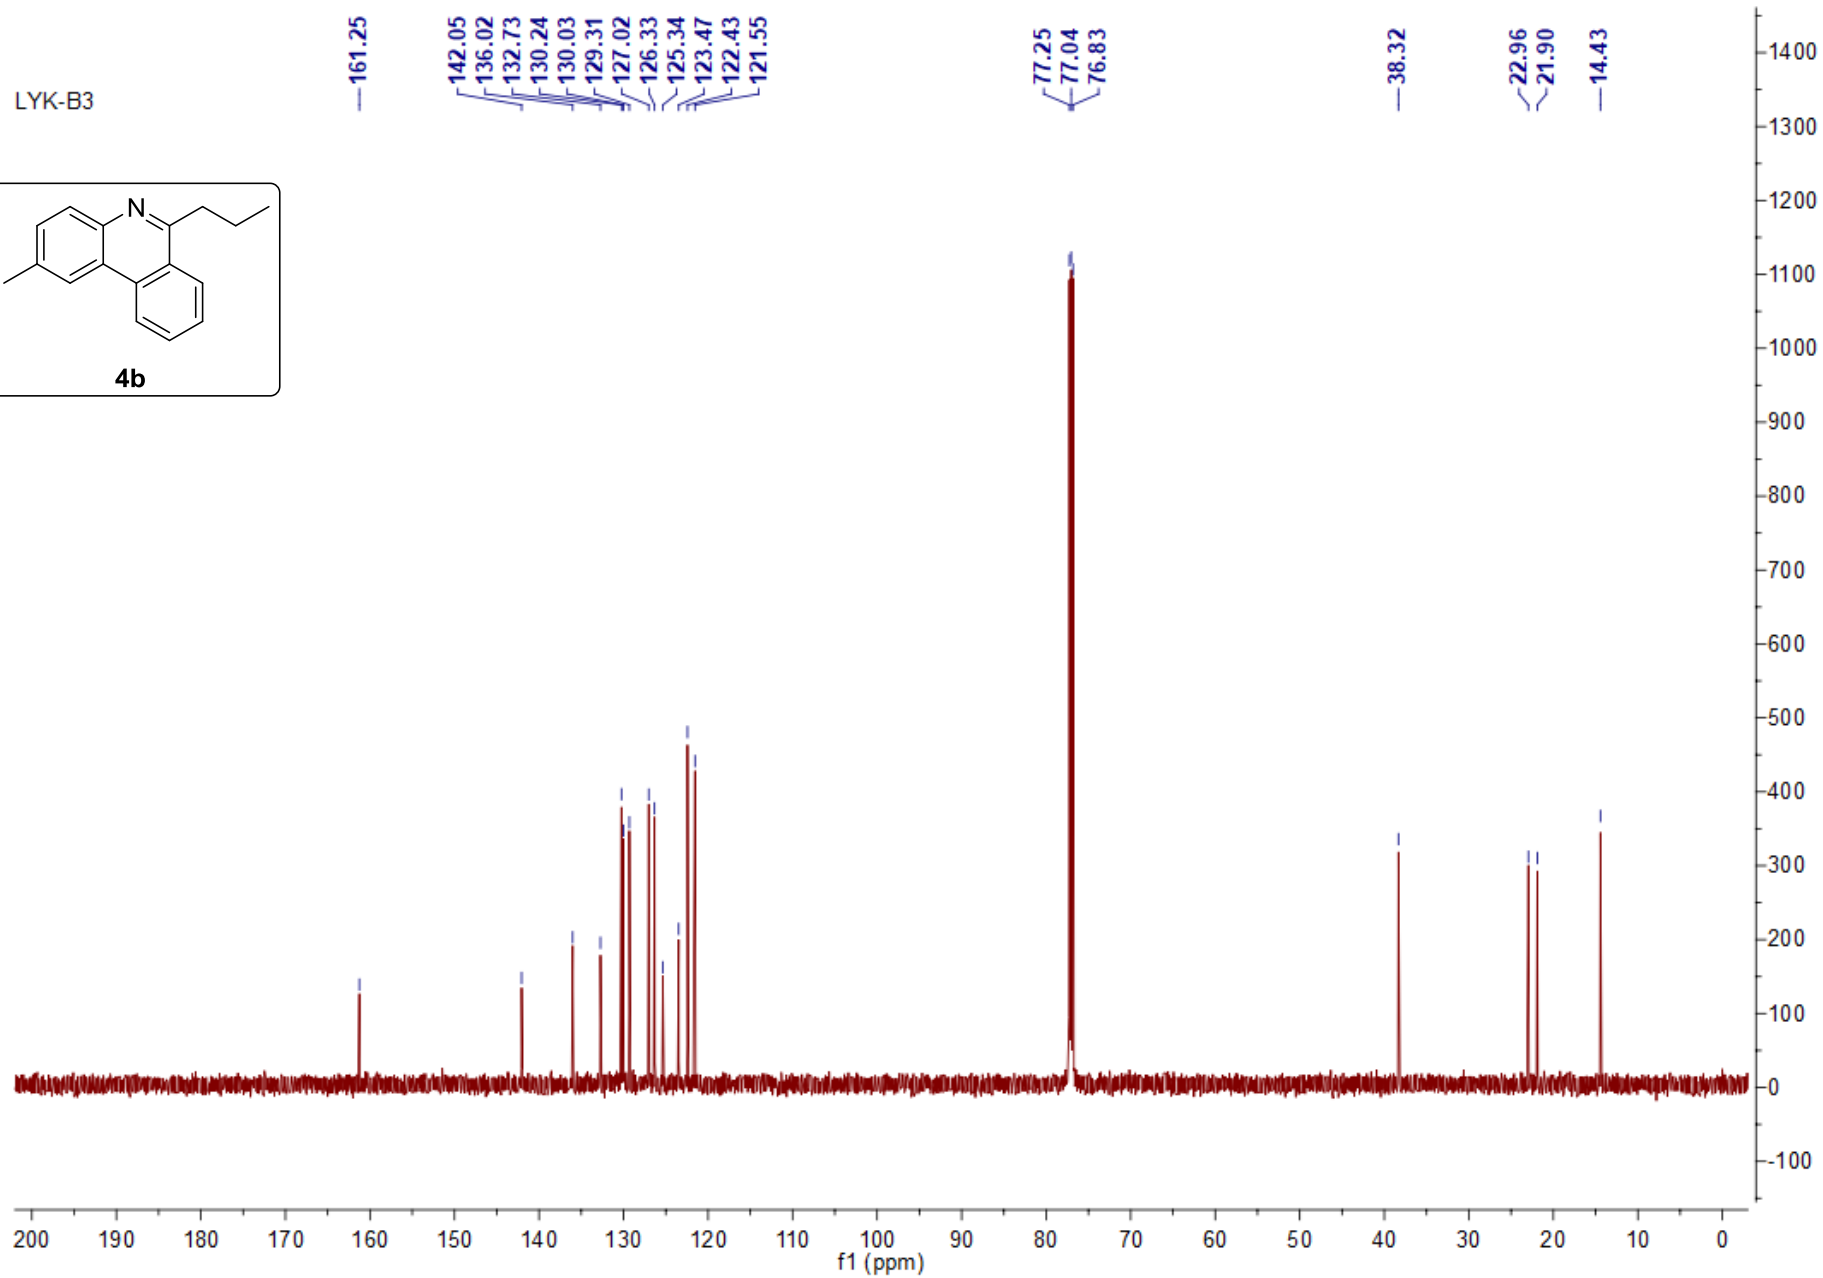

200623  
BHY-F-NA CDC13 0623

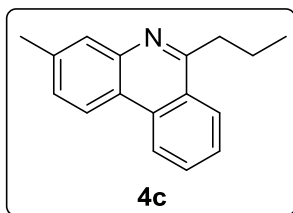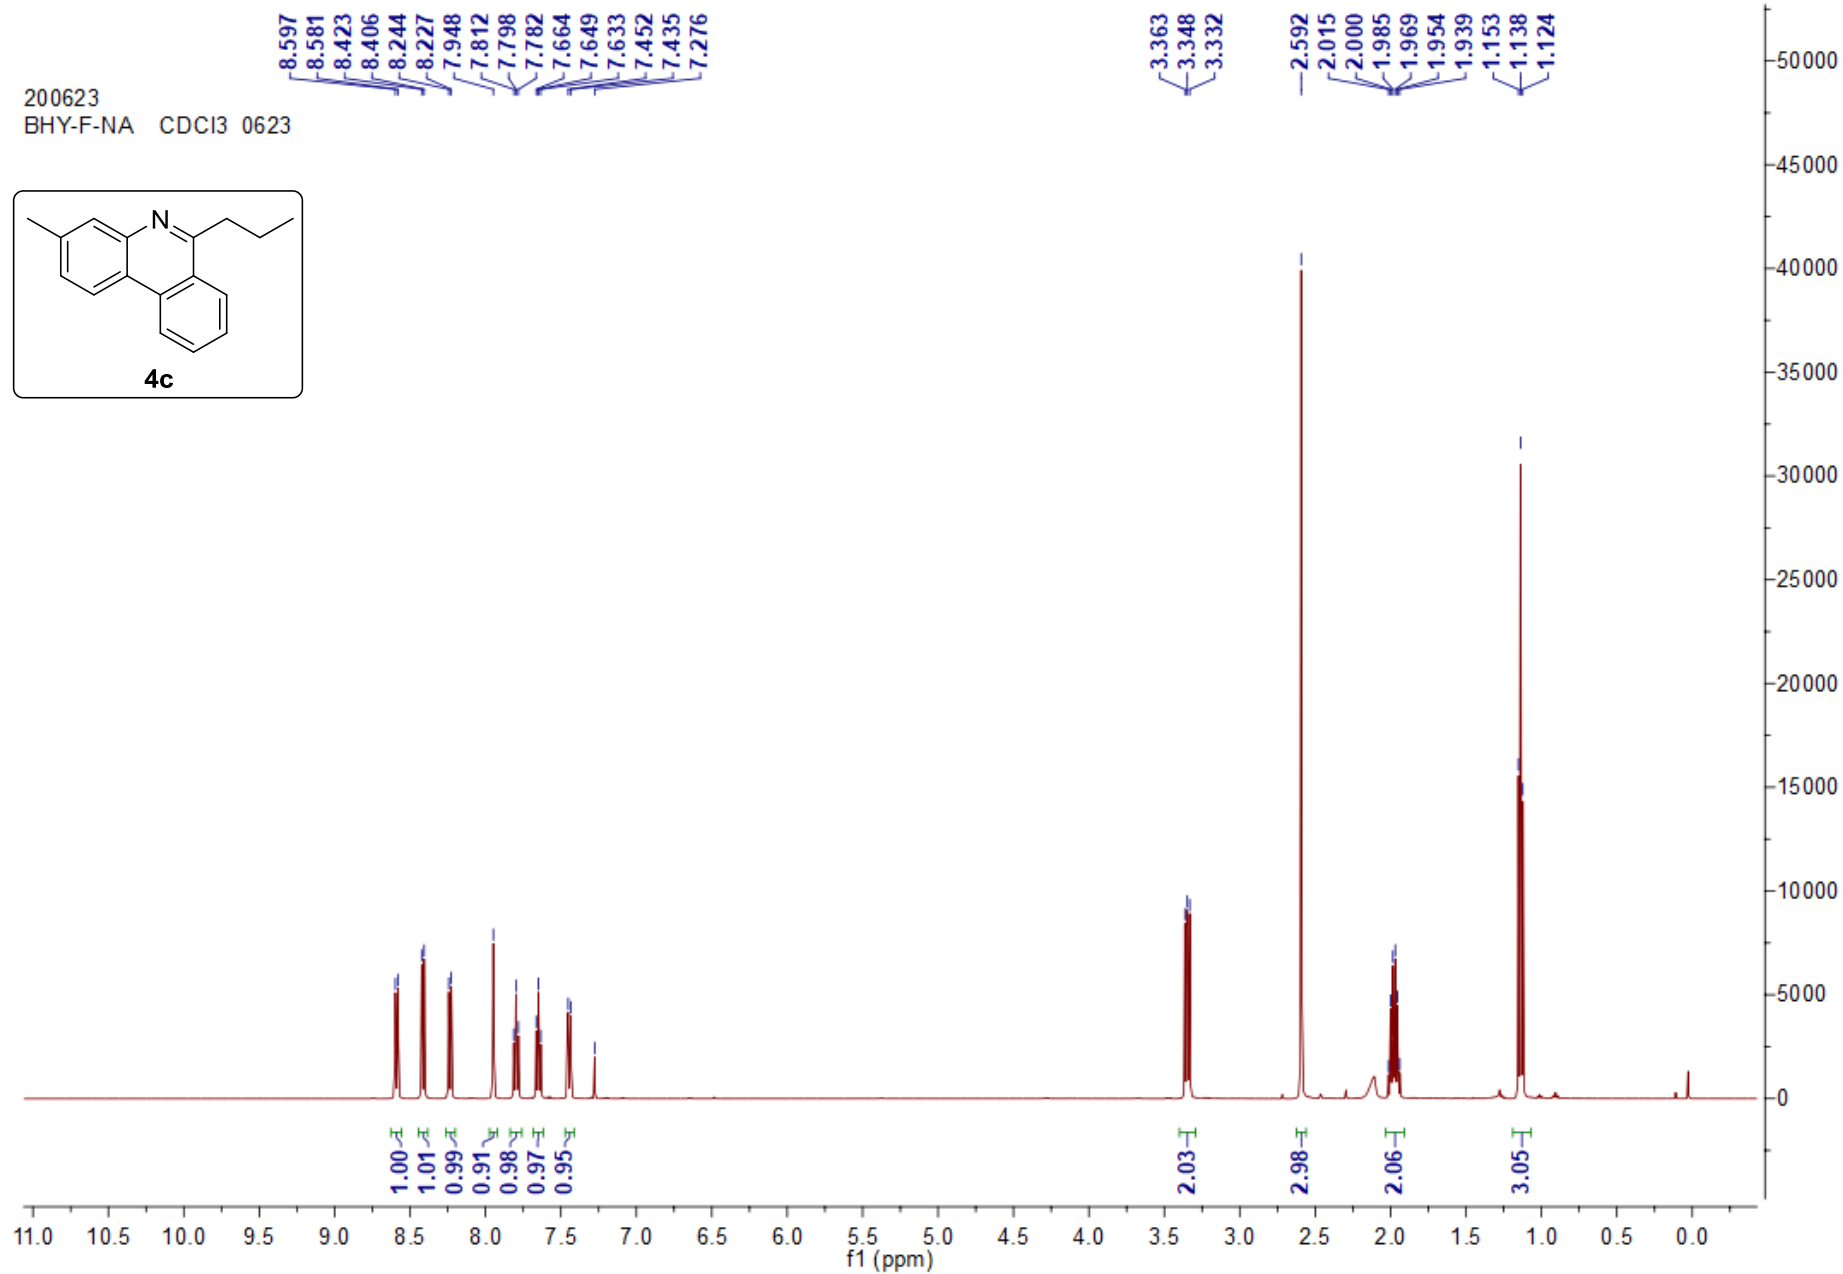

200623  
BHY-F-NA CDCI3 0623

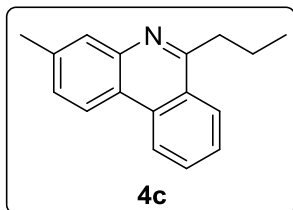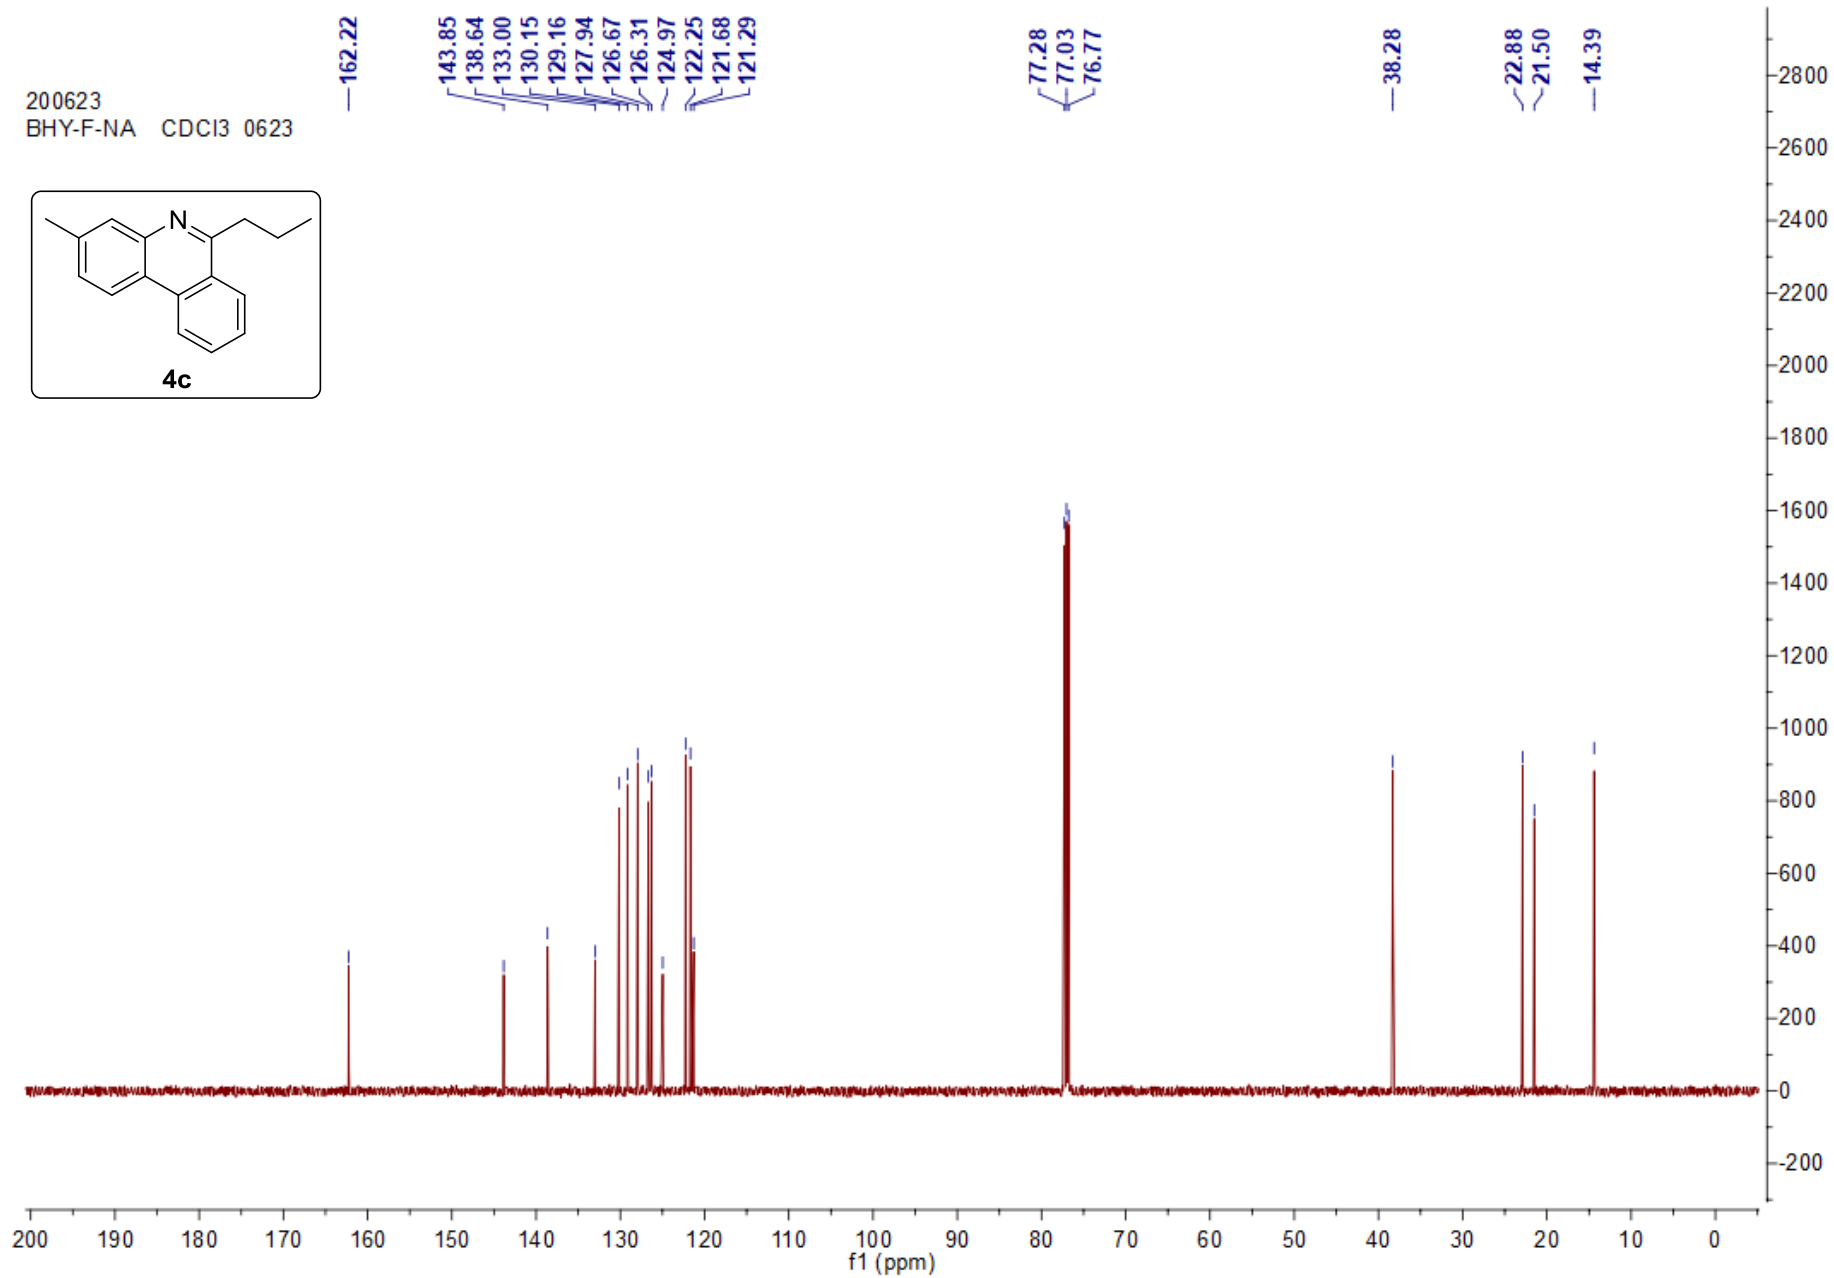

LYK-B4

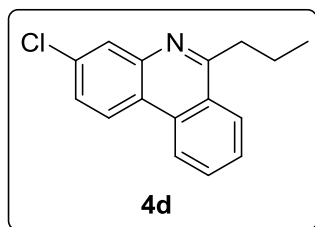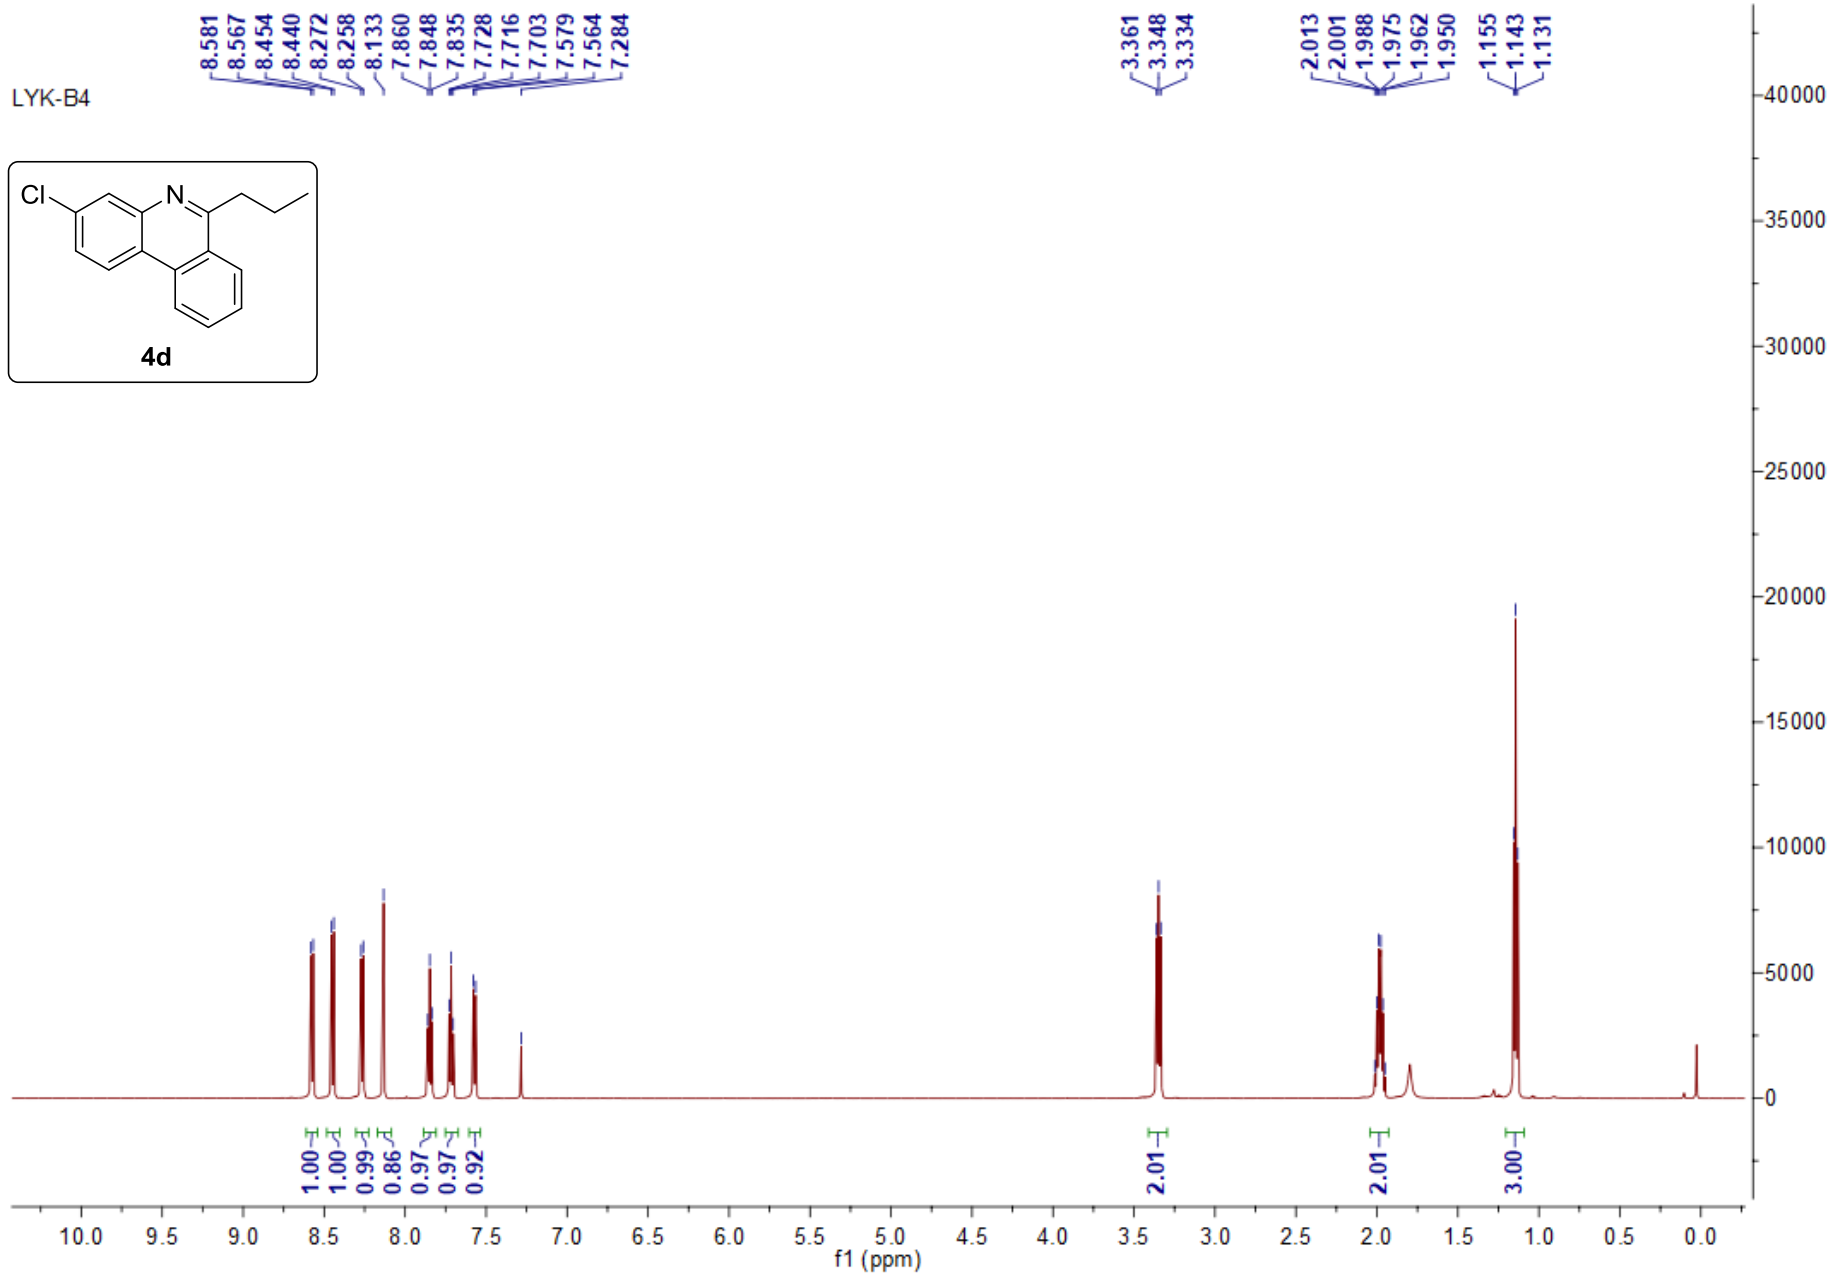

LYK-B4

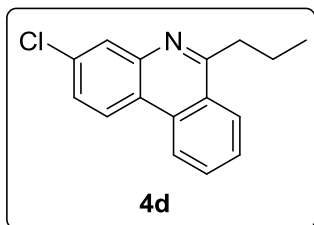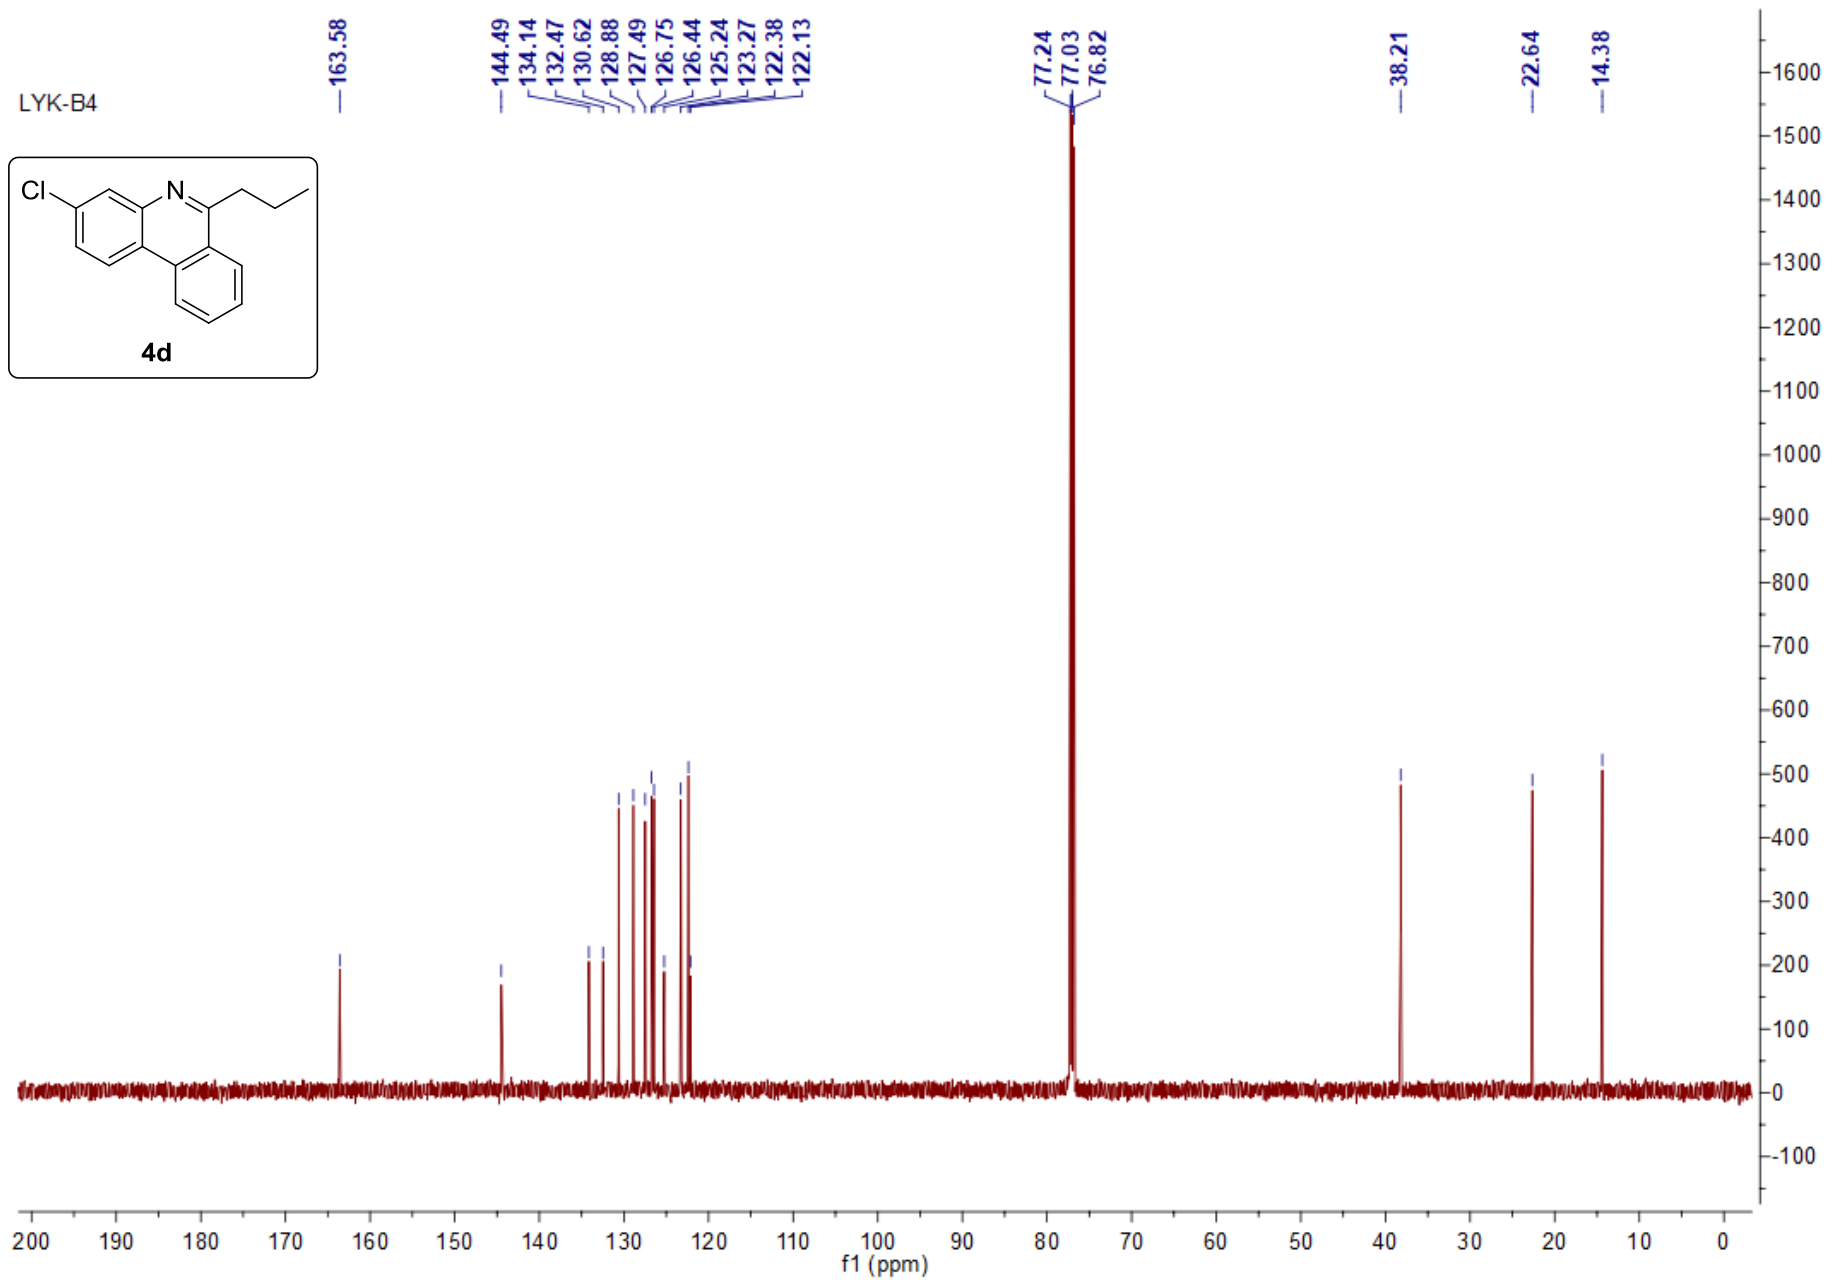



LYK-B2

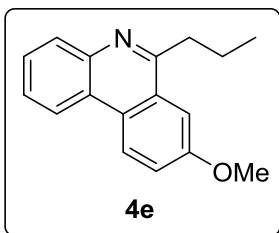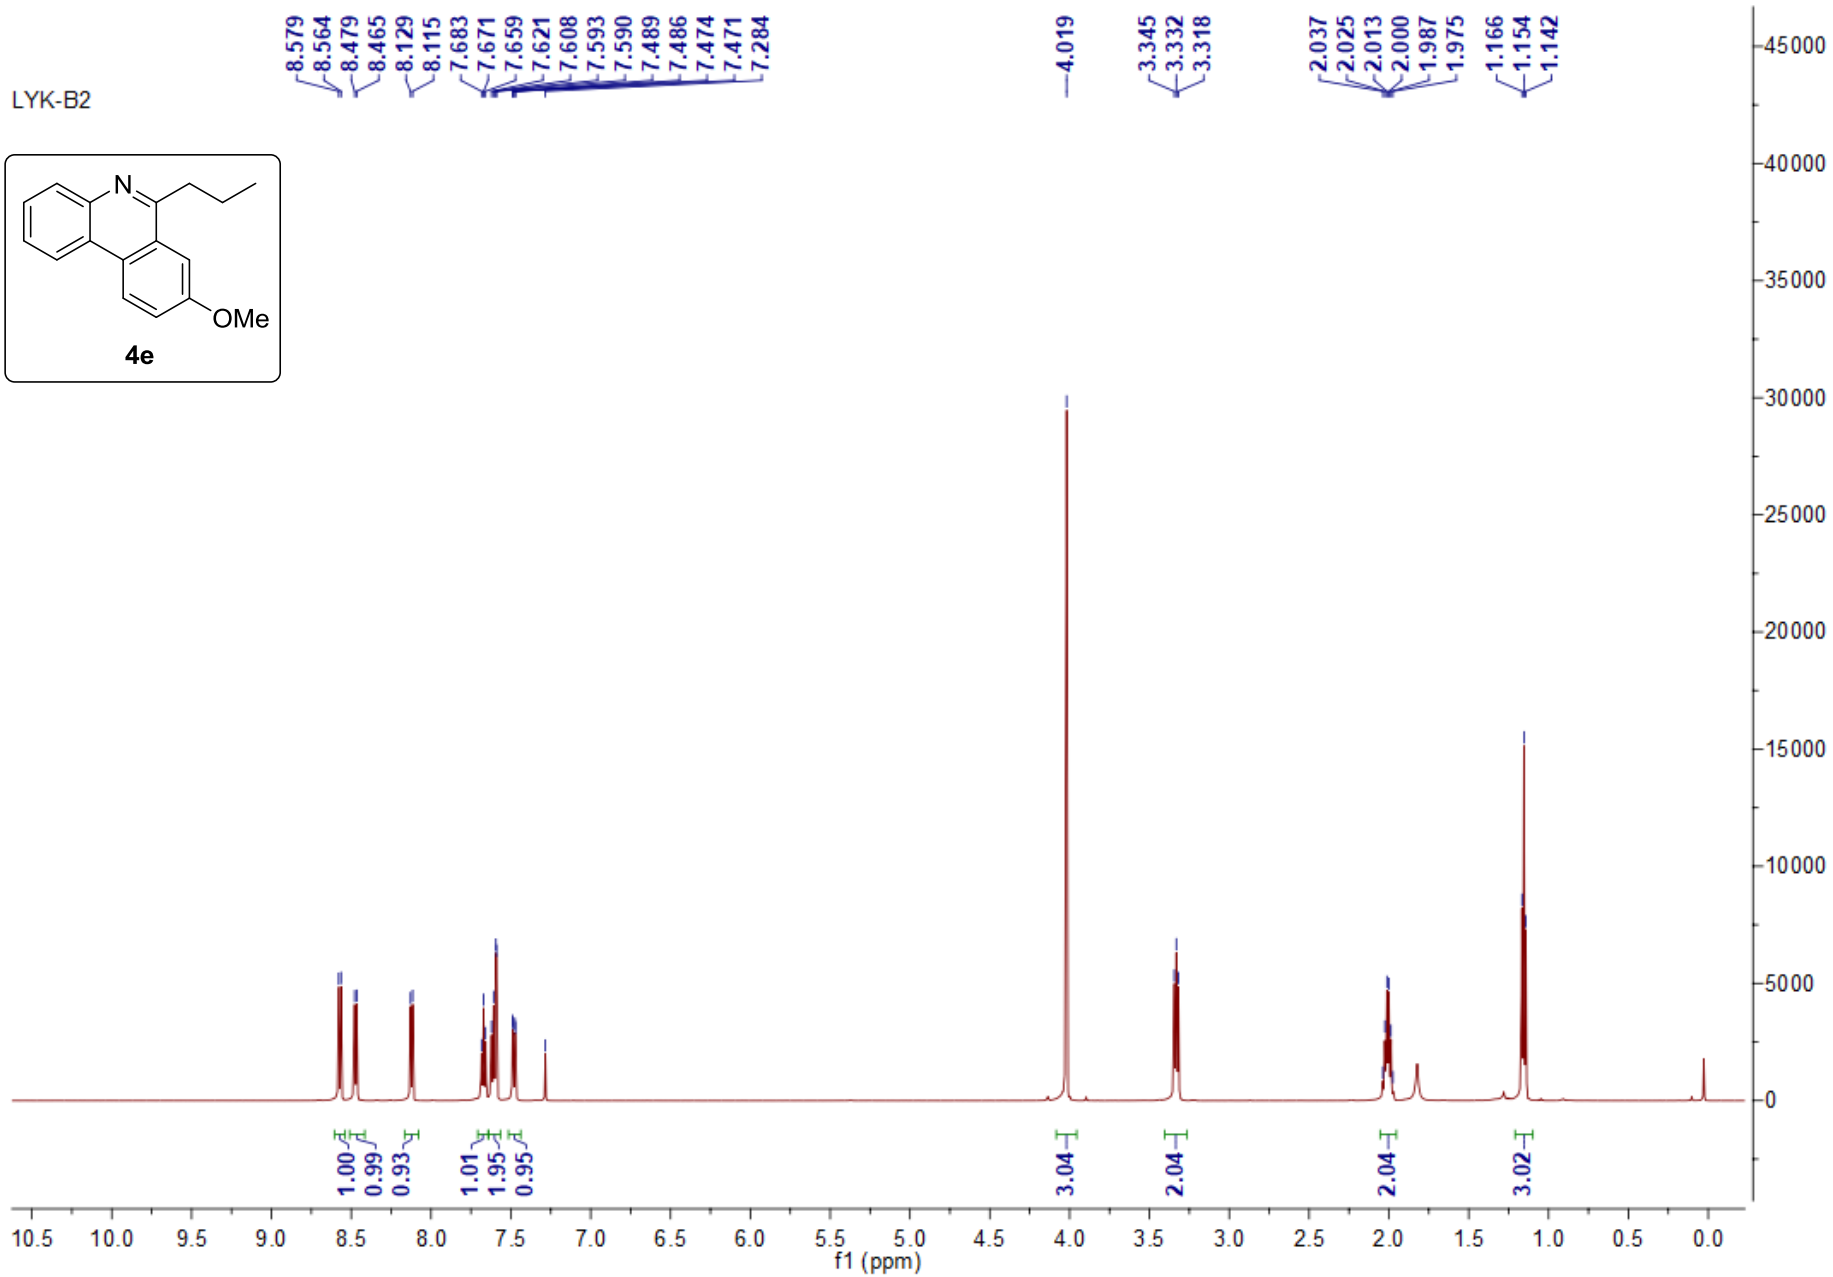

LYK-B2

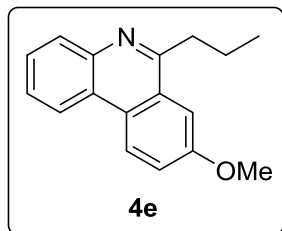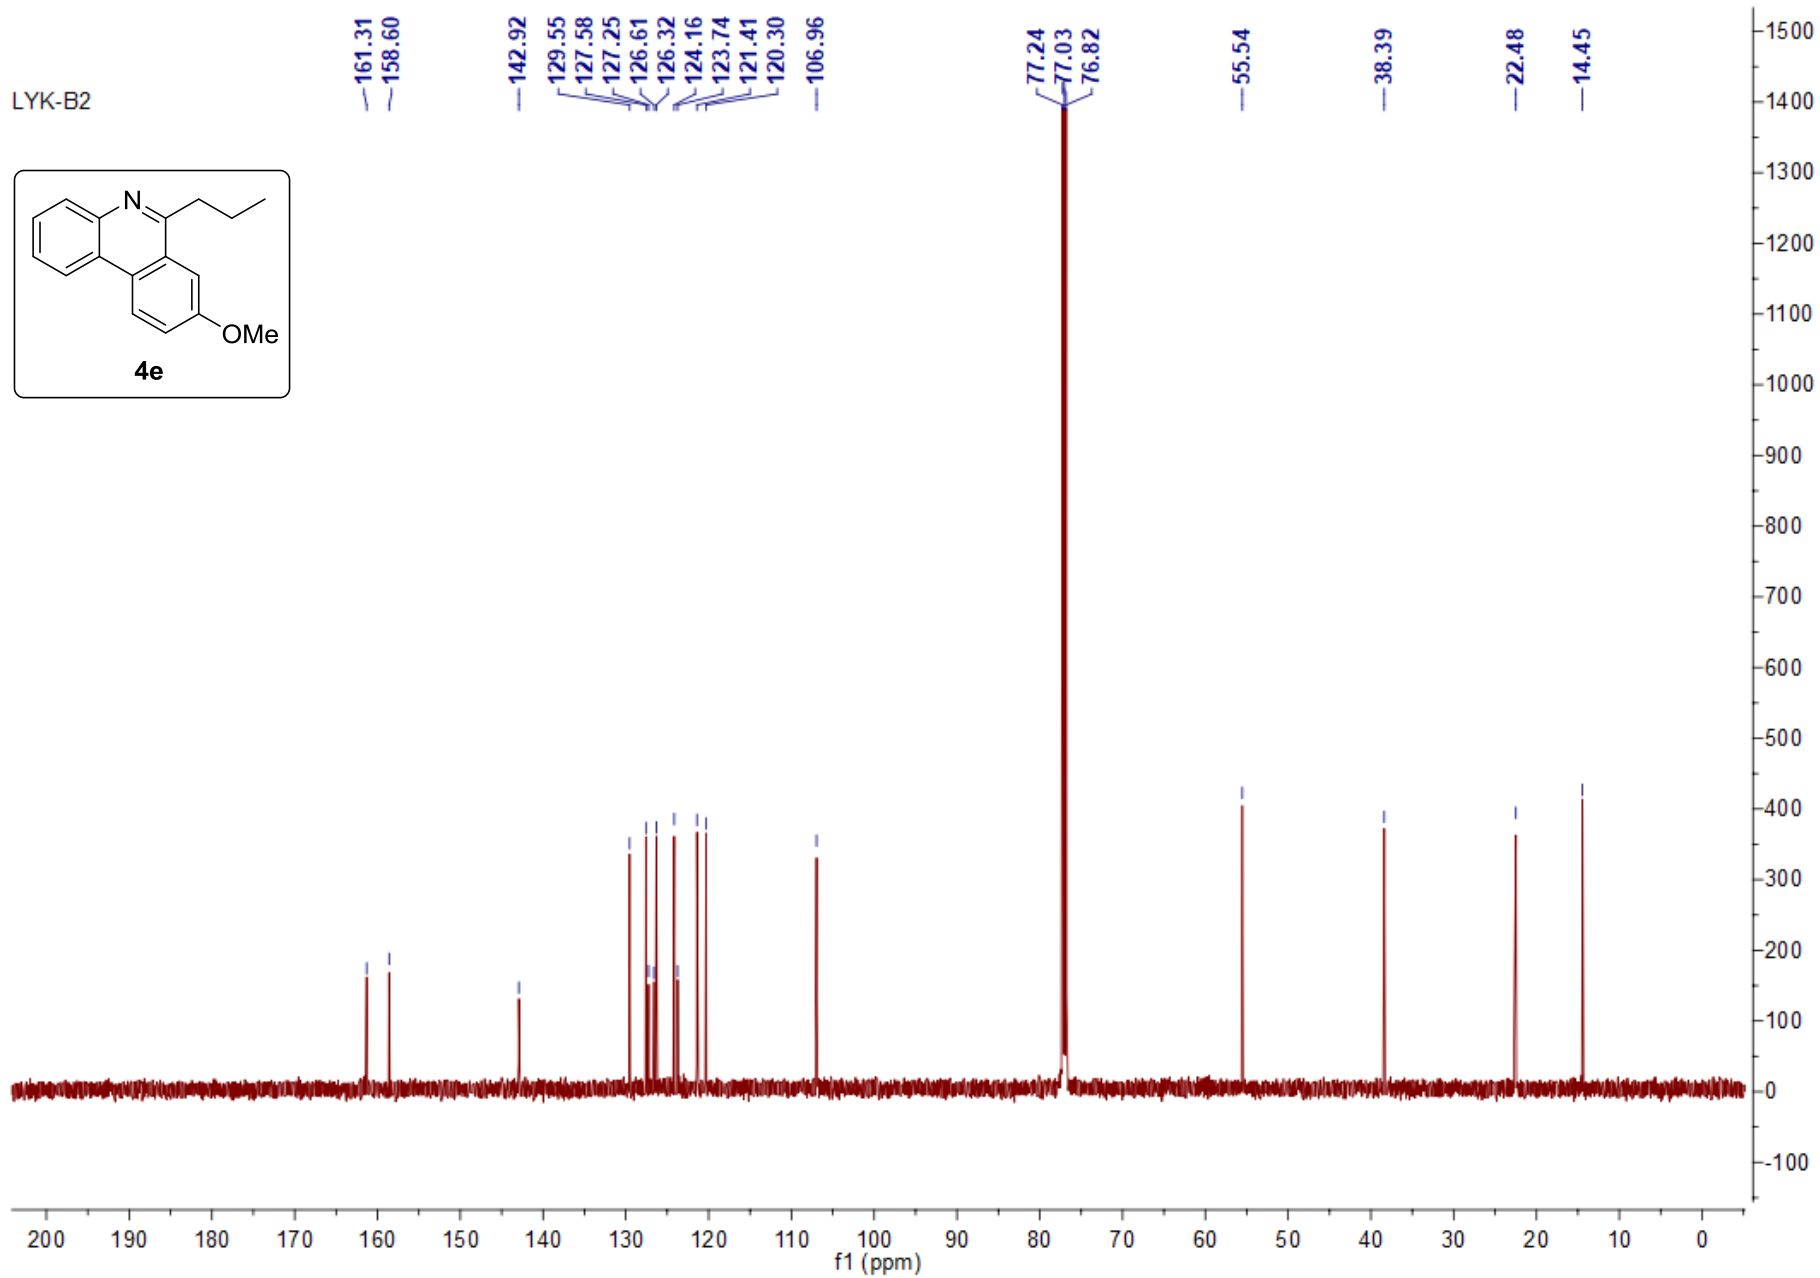

LYK-B1

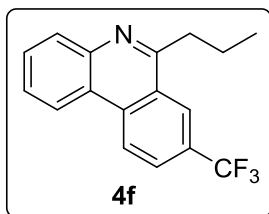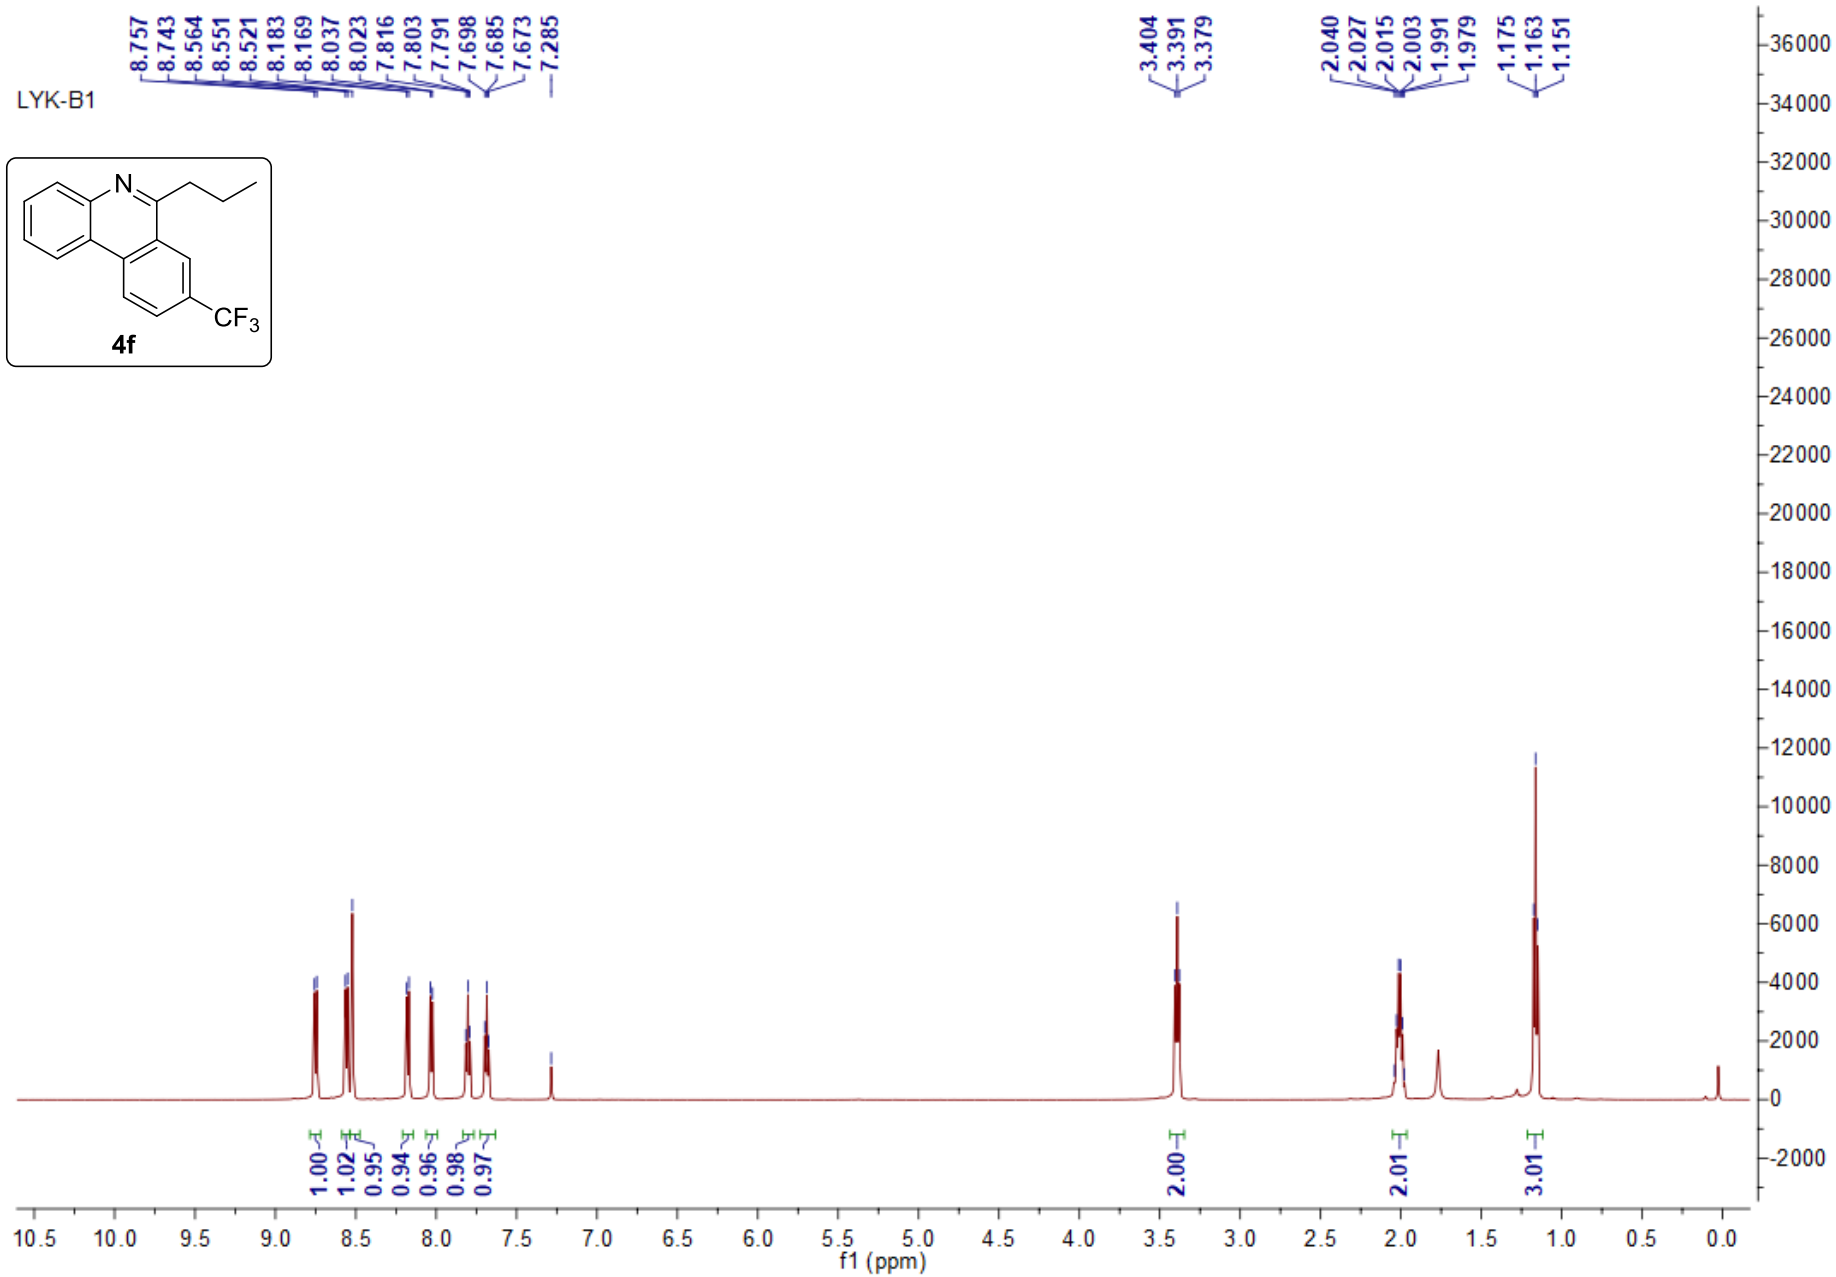

LYK-B1

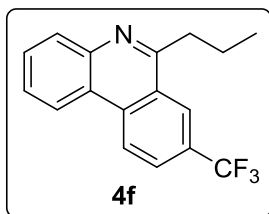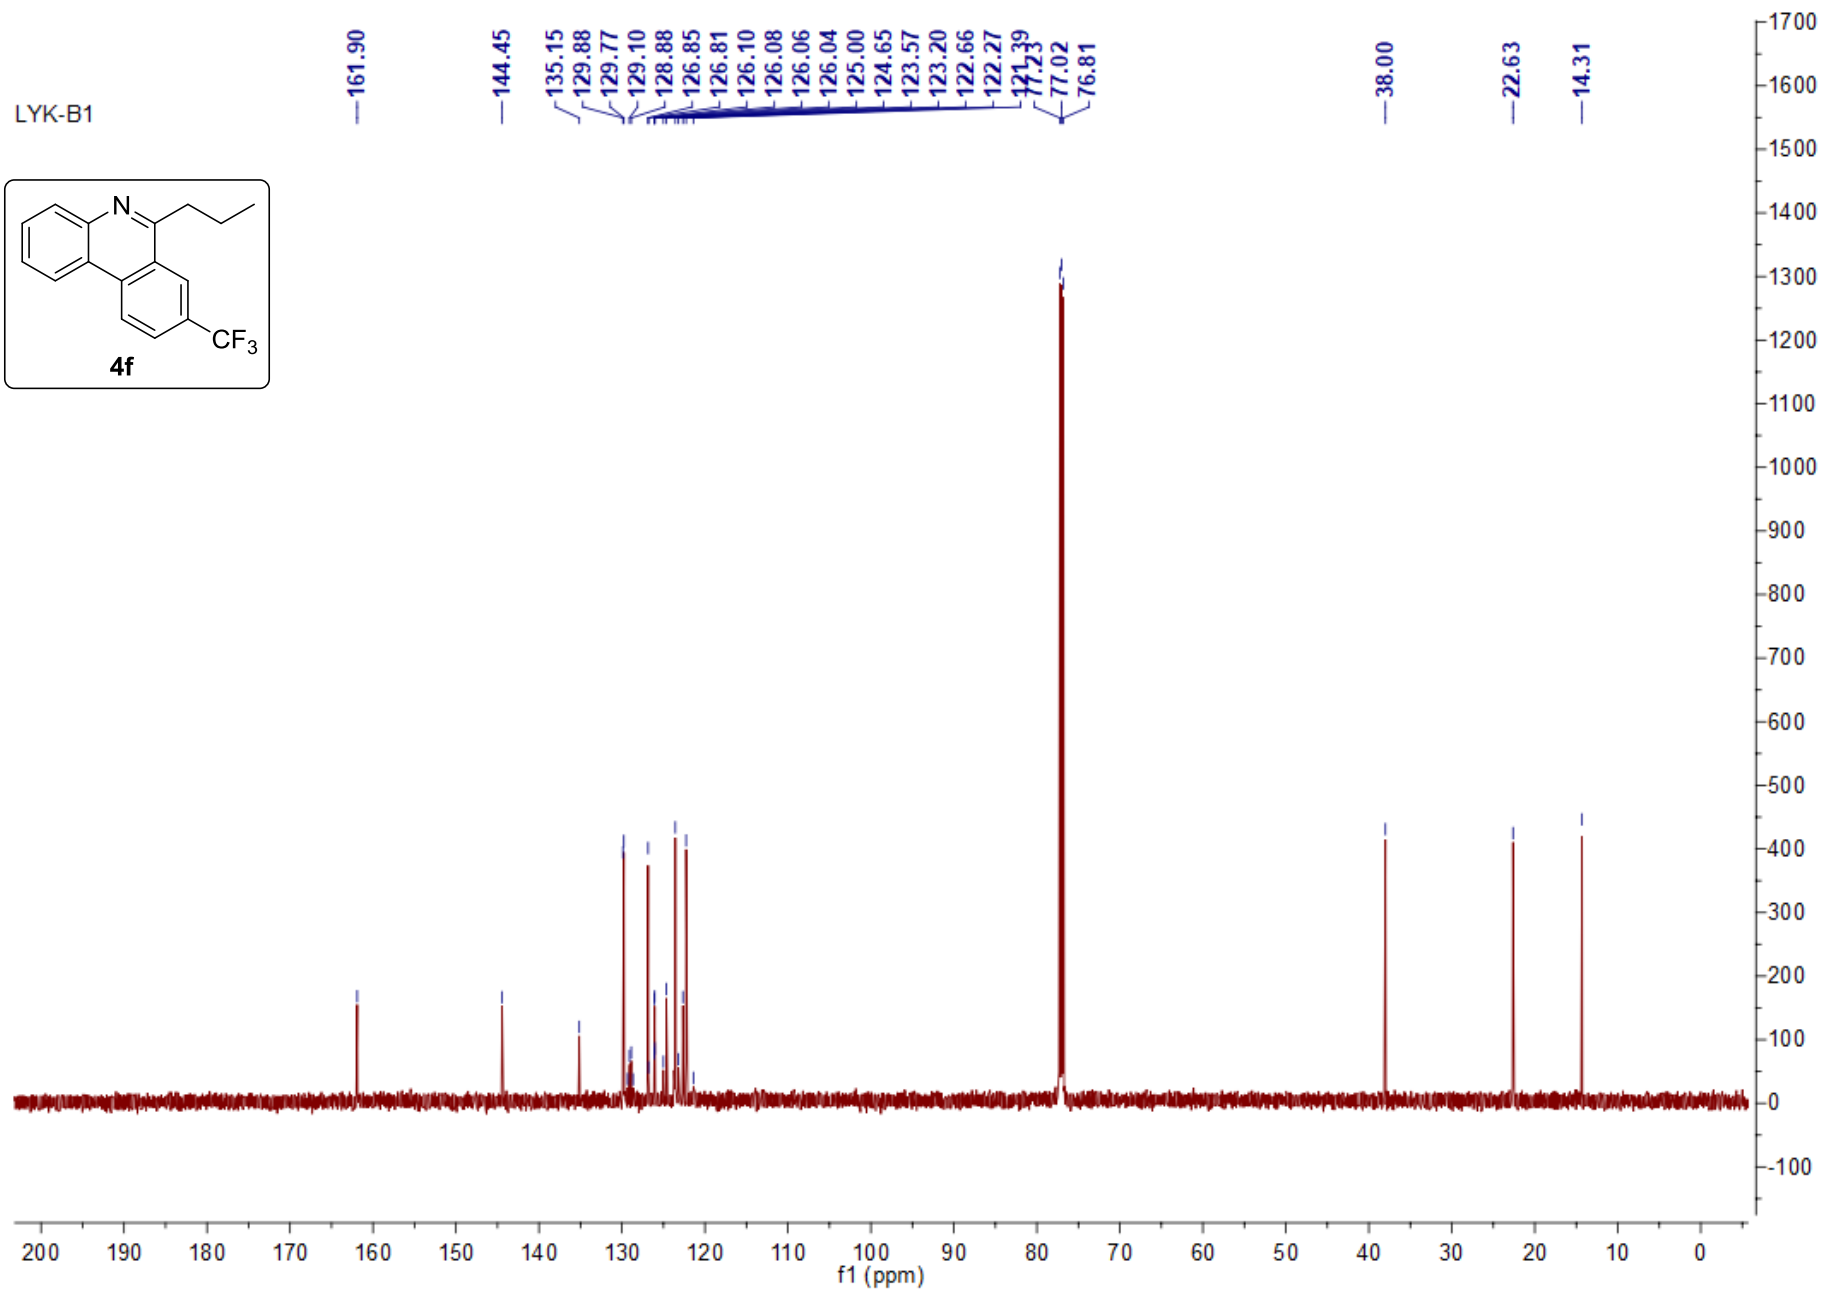

8.654  
8.643  
8.636  
8.625  
8.495  
8.479  
8.148  
8.146  
8.132  
8.130  
7.882  
7.876  
7.862  
7.857  
7.735  
7.732  
7.718  
7.704  
7.702  
7.653  
7.650  
7.636  
7.622  
7.620  
7.606  
7.601  
7.588  
7.583  
7.572  
7.567  
7.276

200623  
BHY-F-R2-4F CDC13 0623

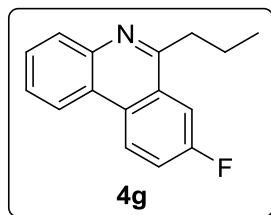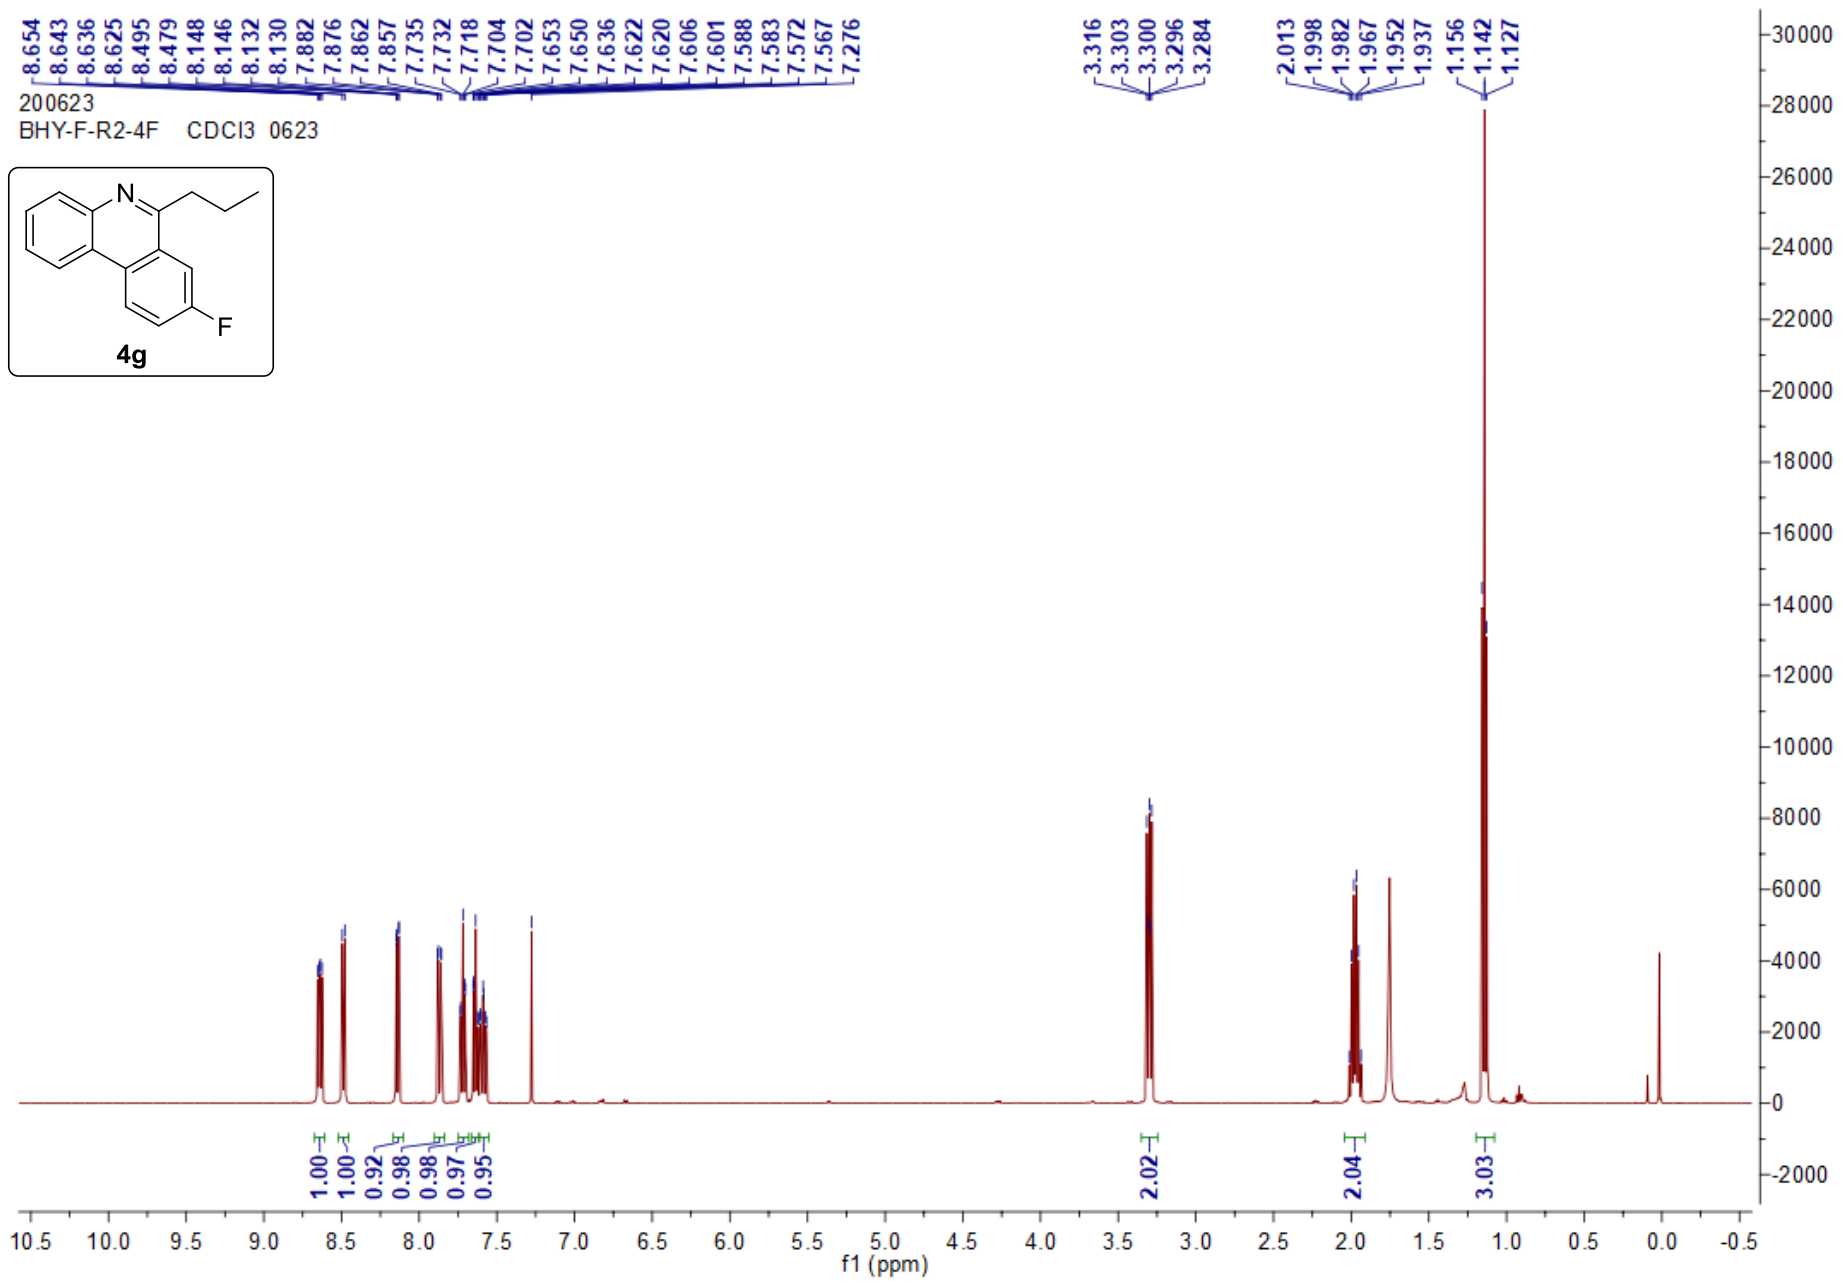

200623  
BHY-F-R2-4F CDCl<sub>3</sub> 0623

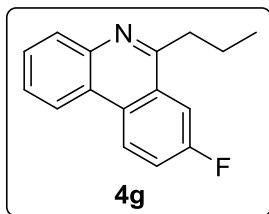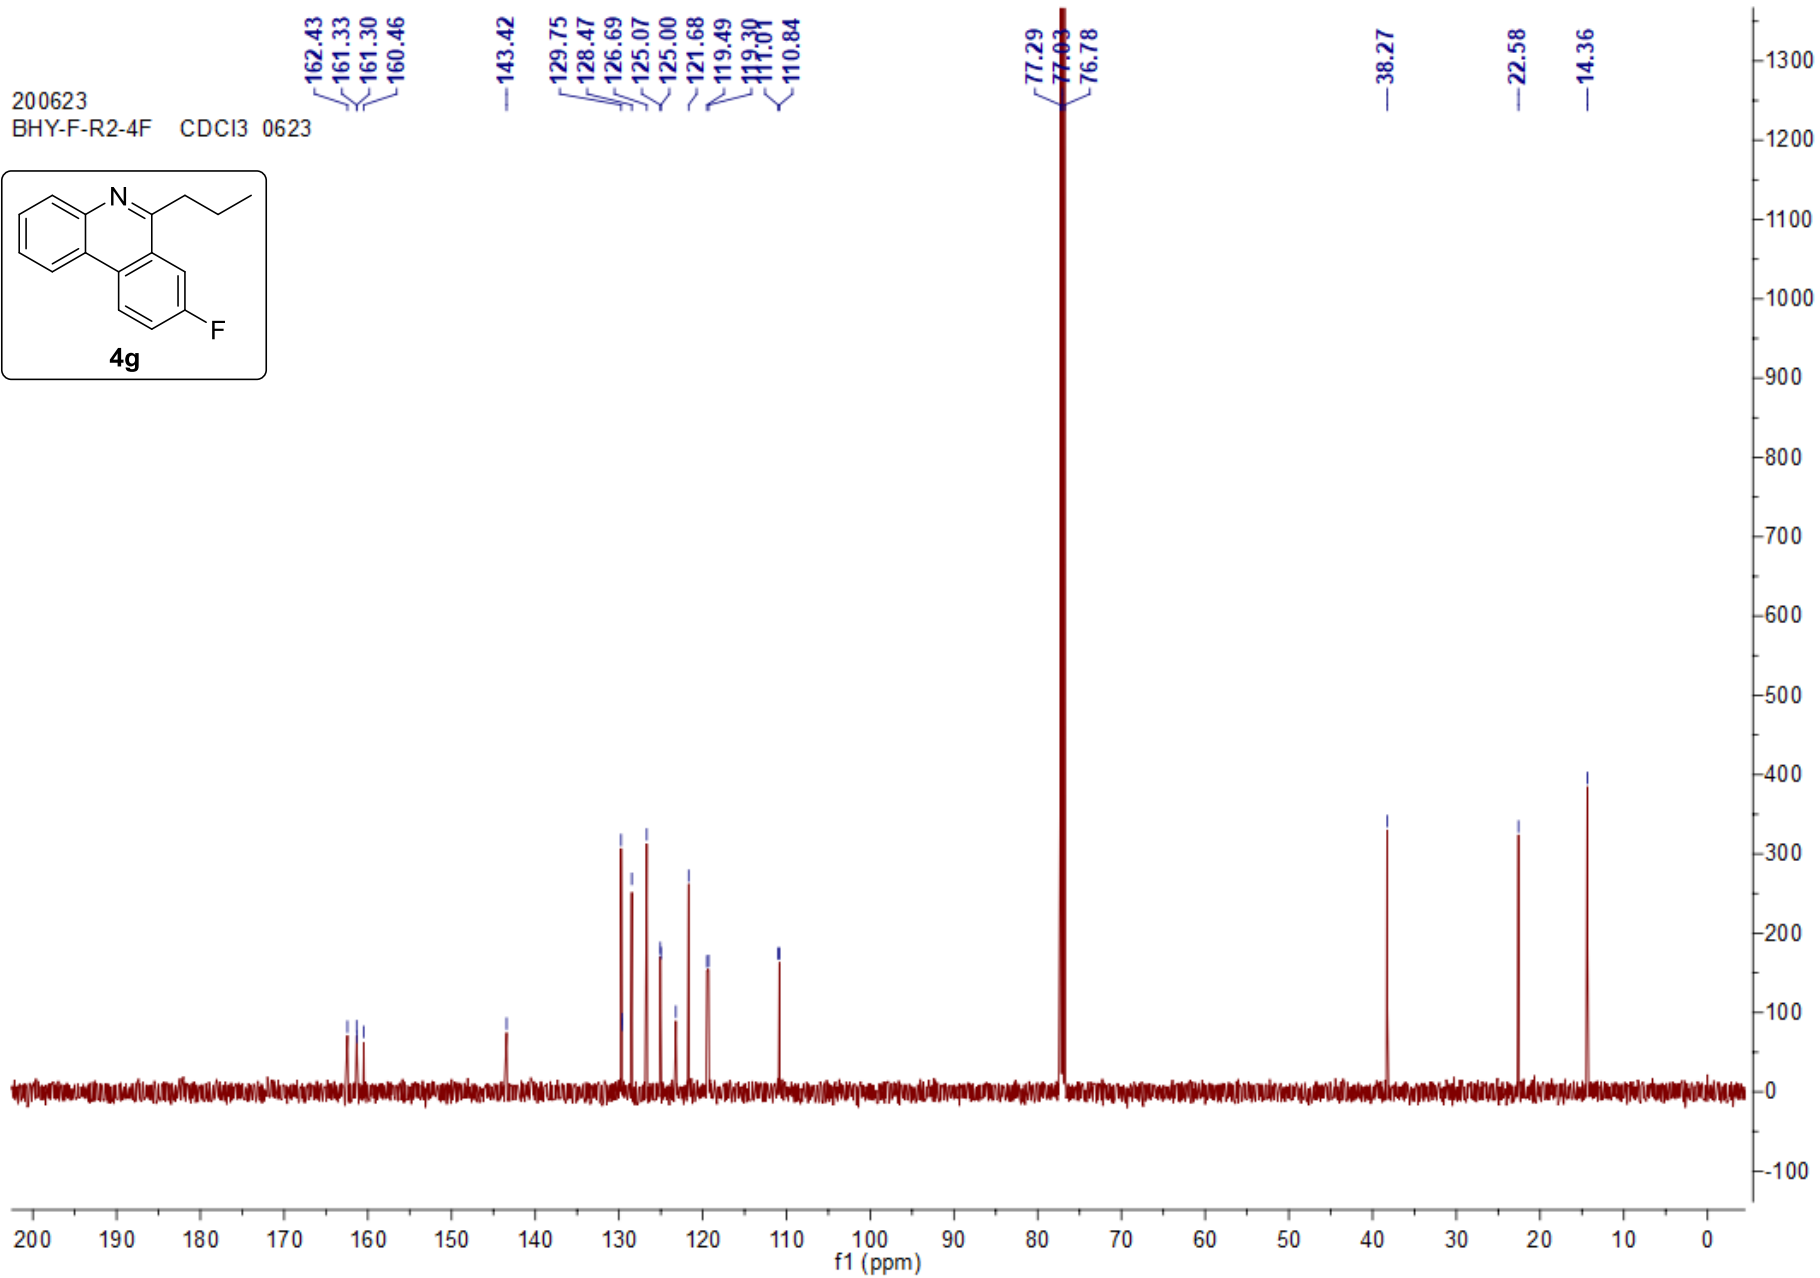

191022  
JQF-NC1 CDCl3 1022

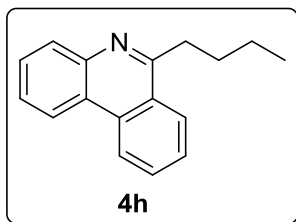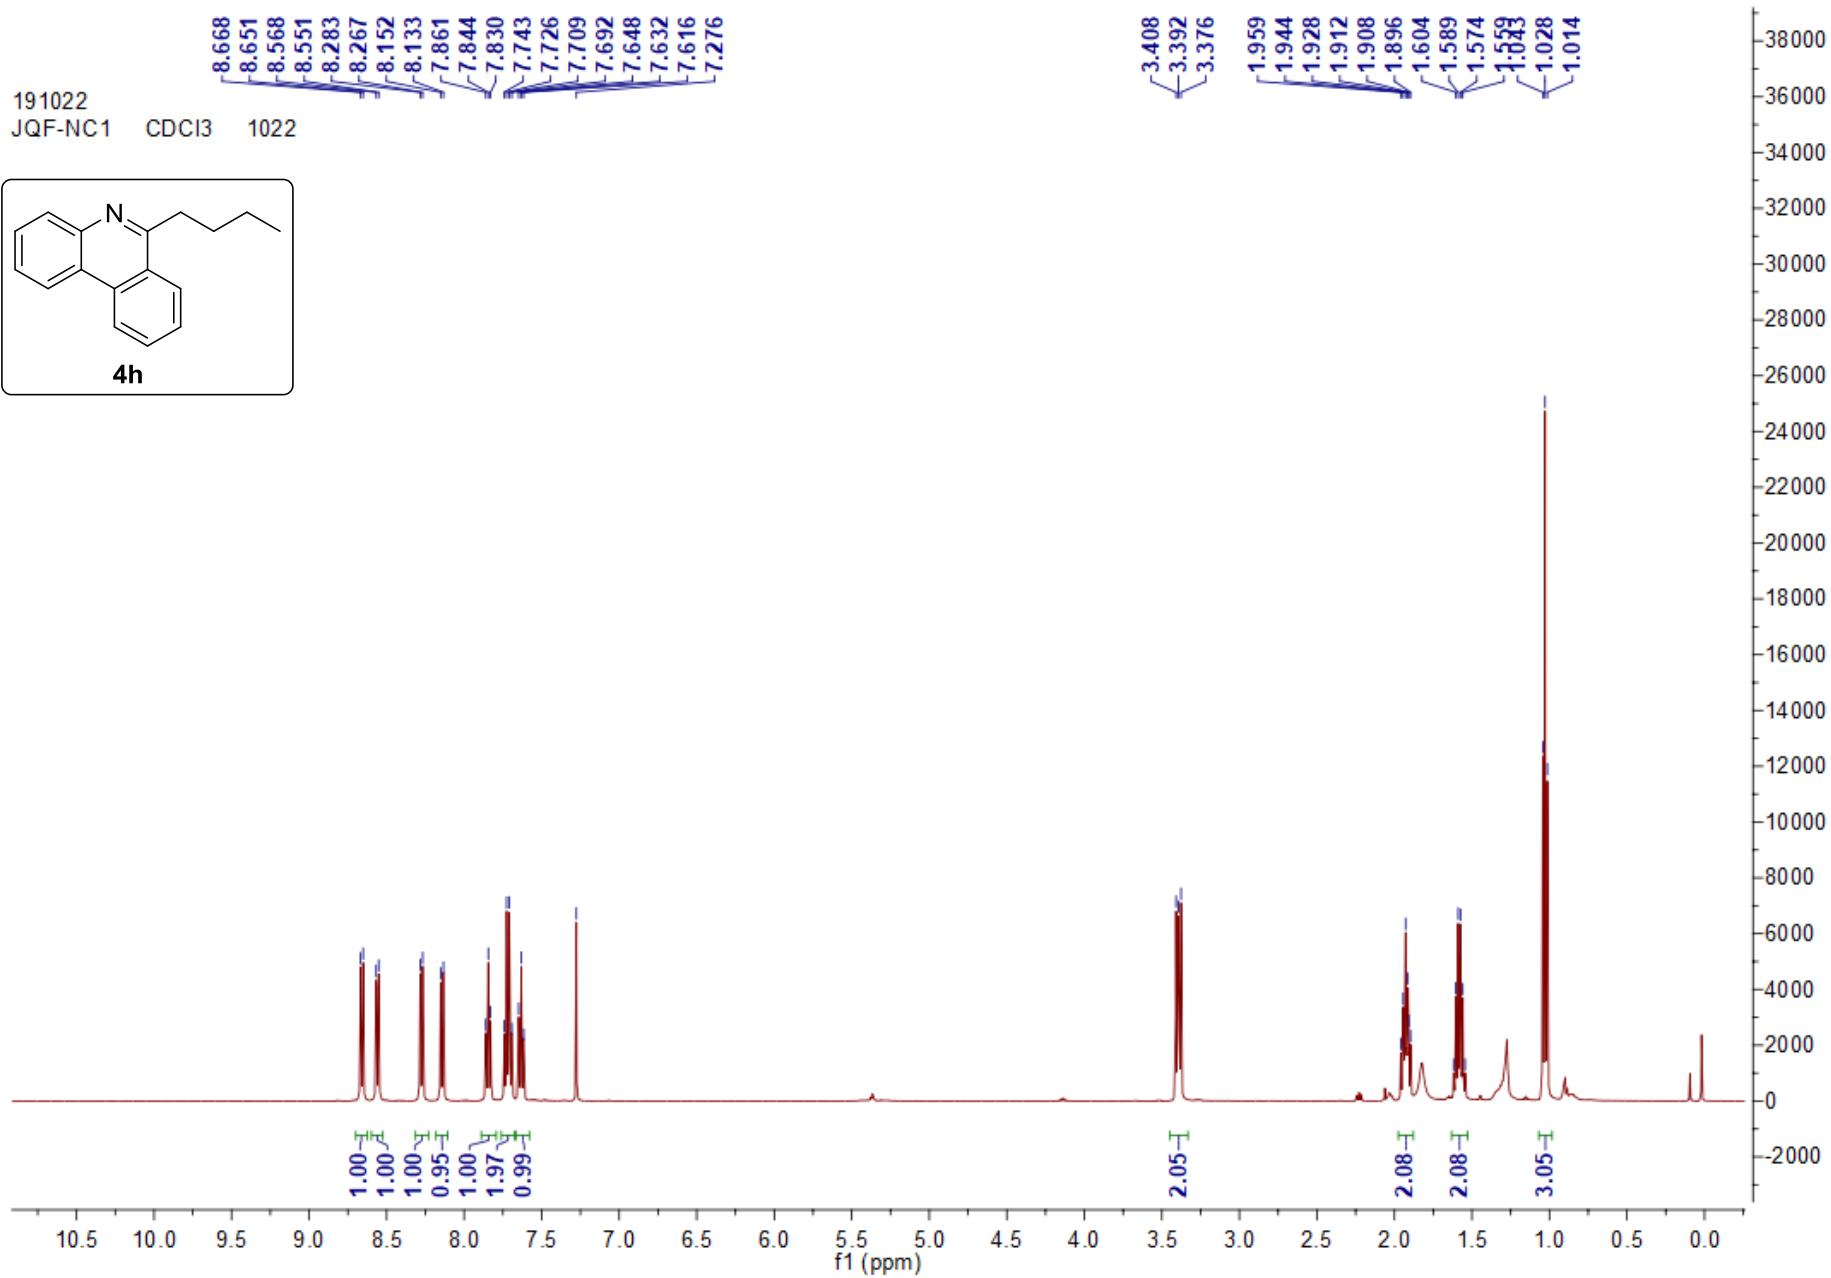

191024  
JQF-NCL CDC13 1024

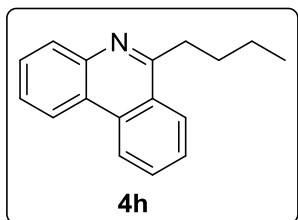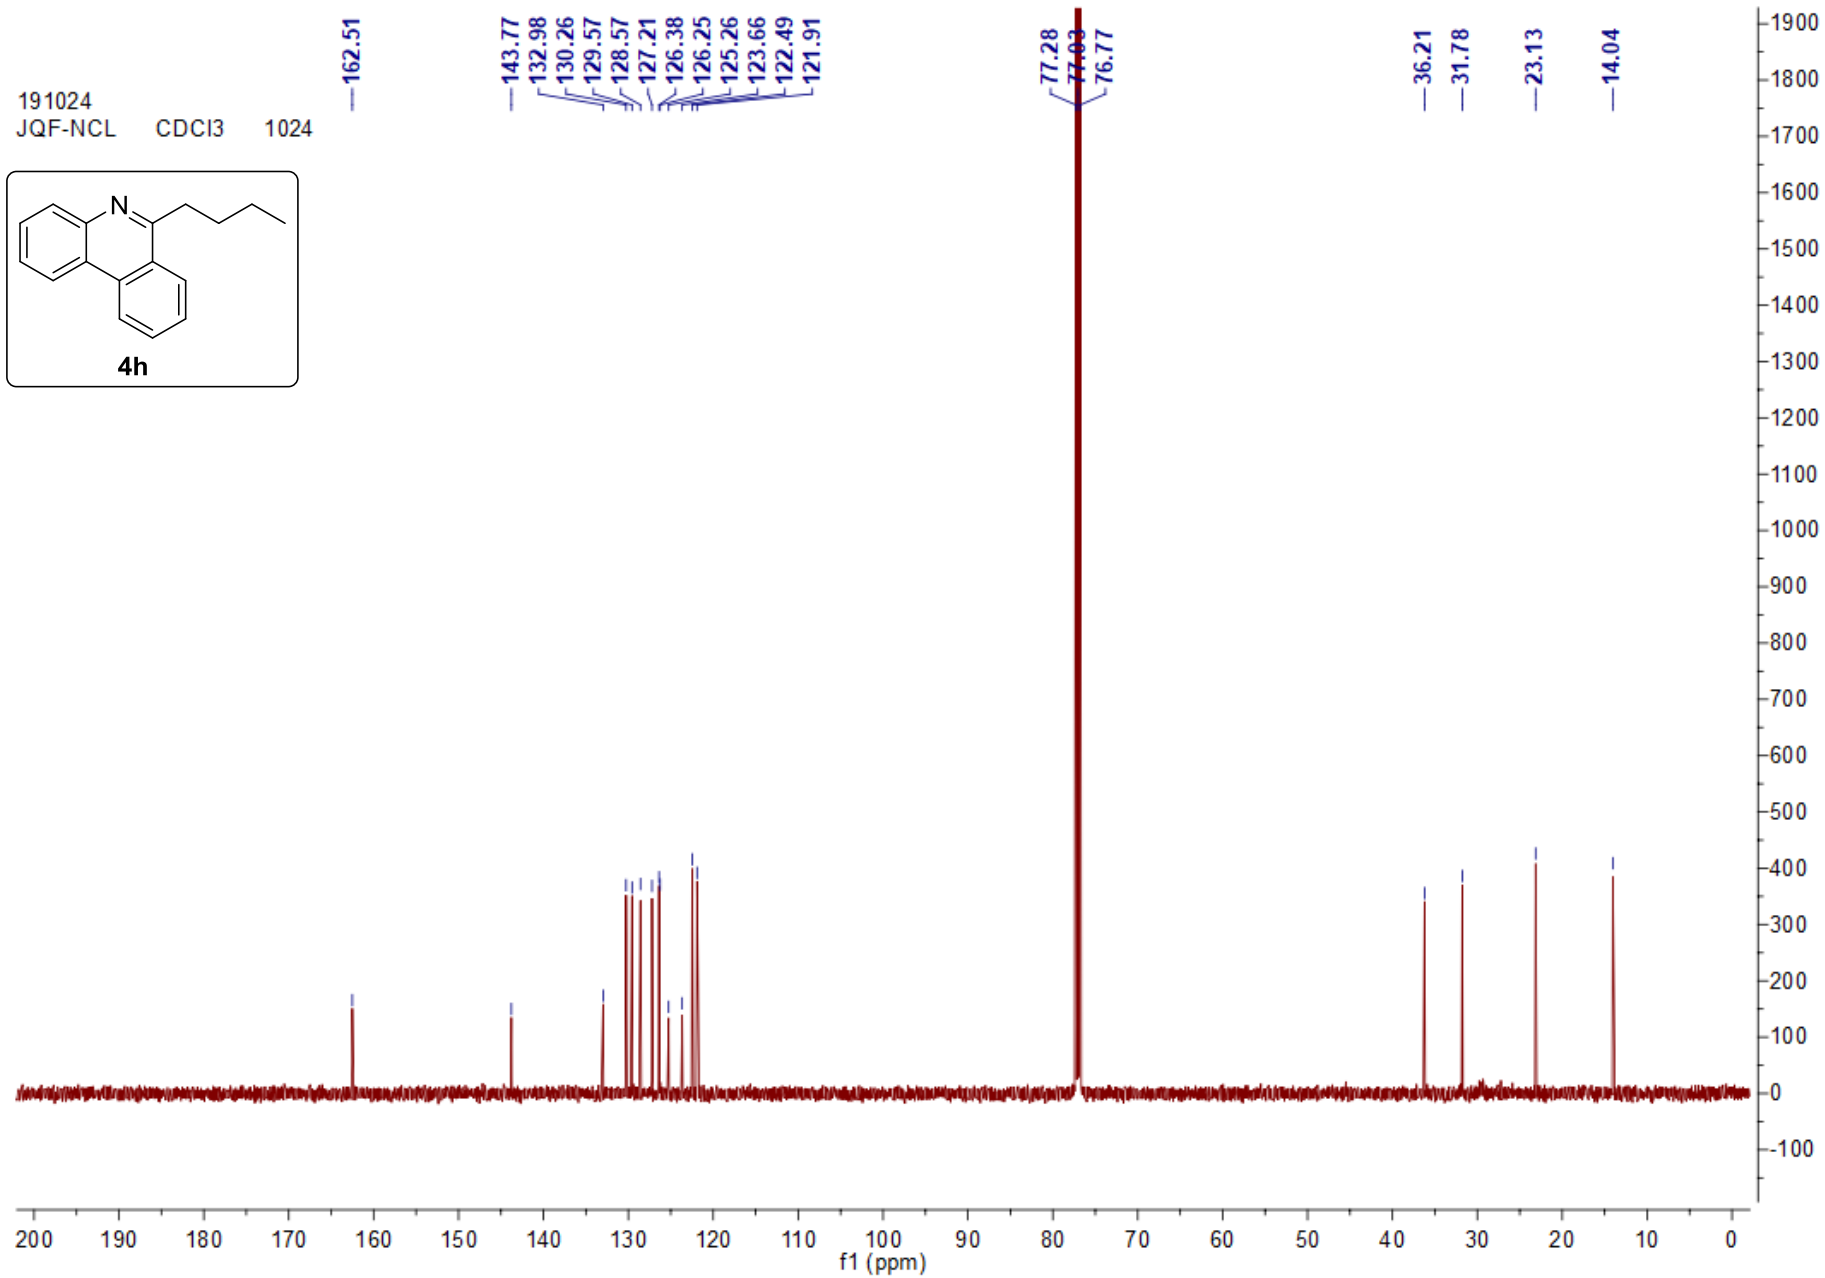



LYK-B5

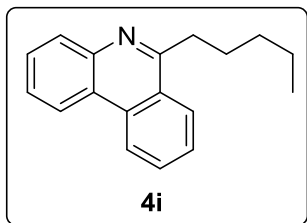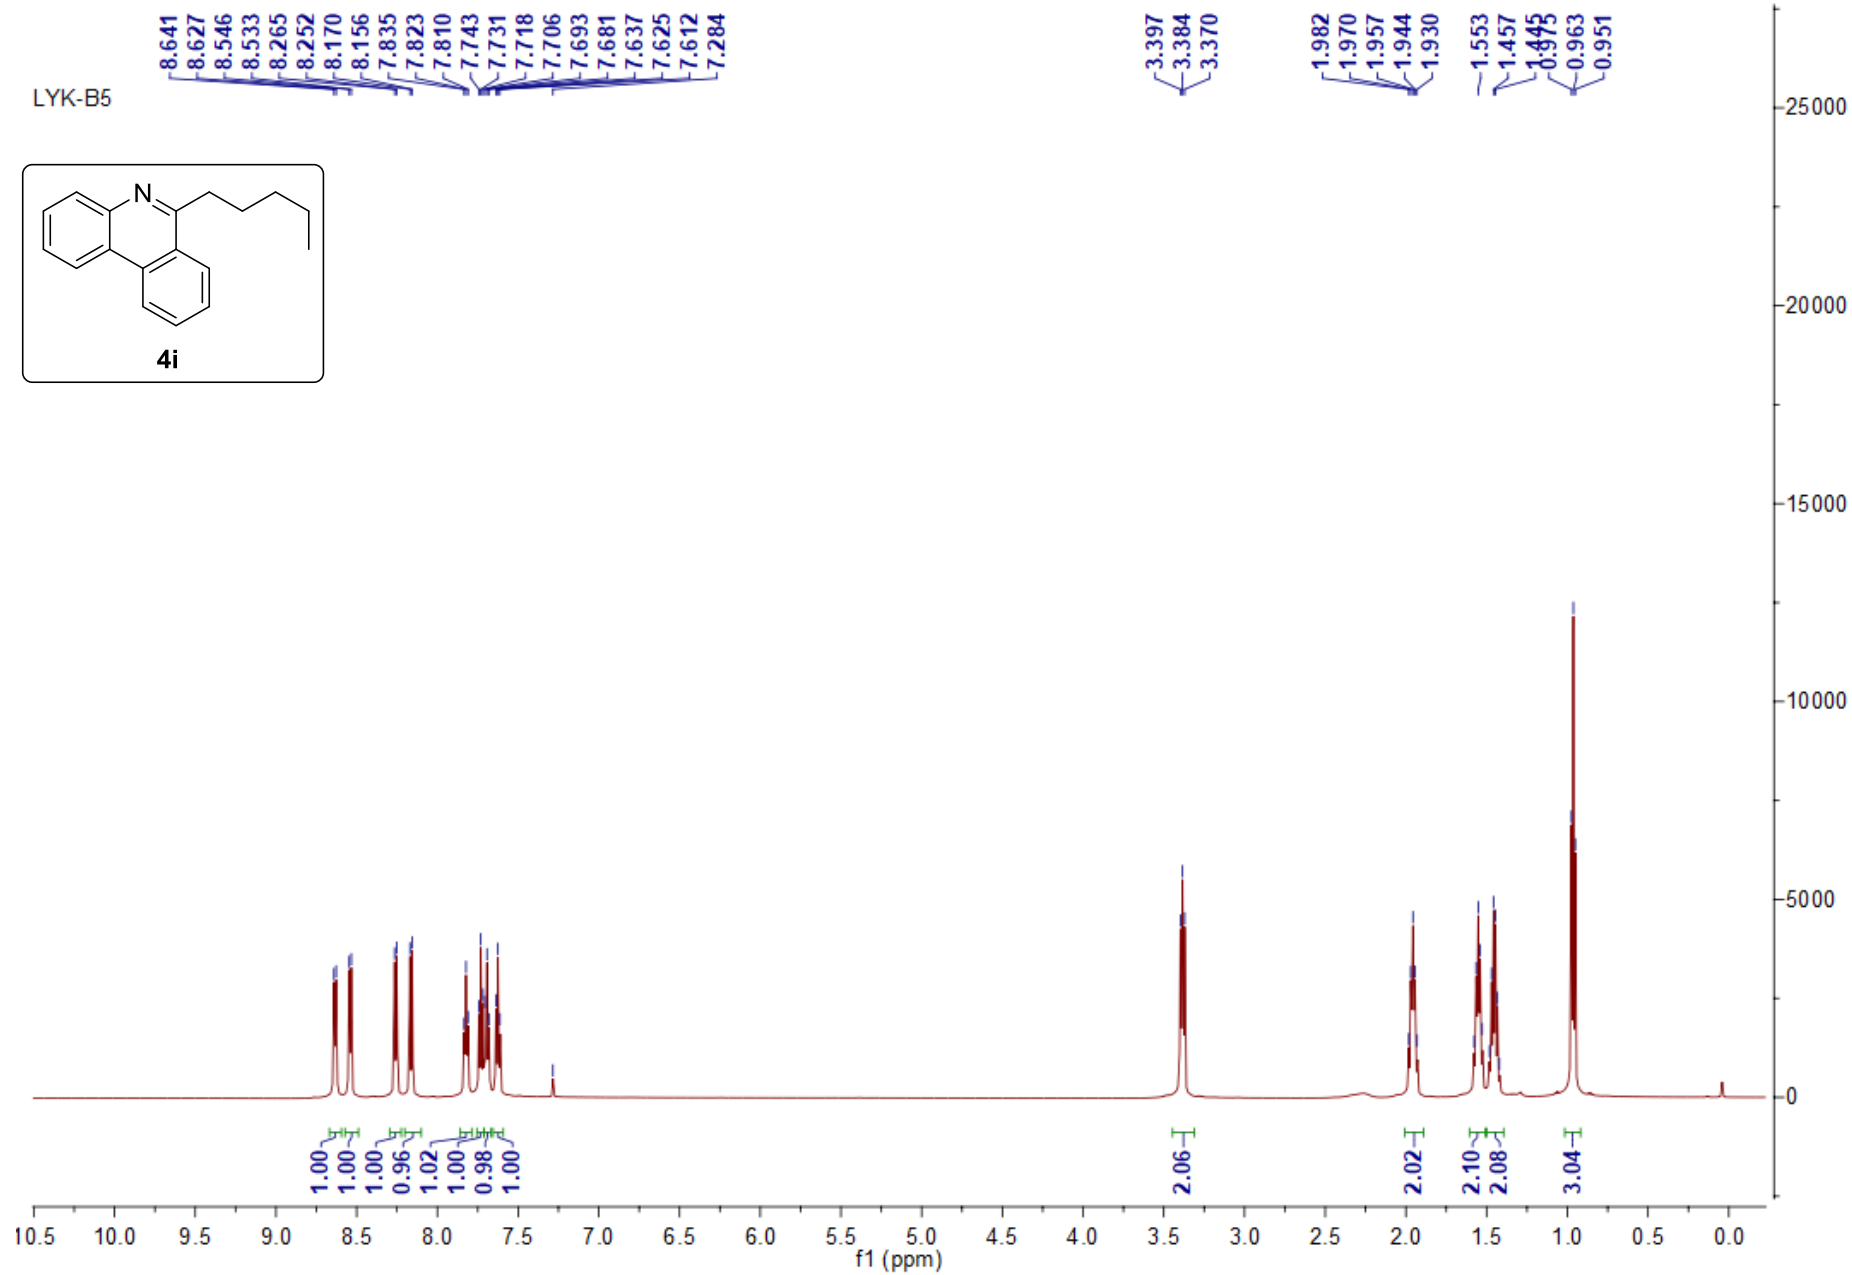

LYK-B5

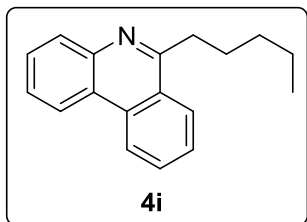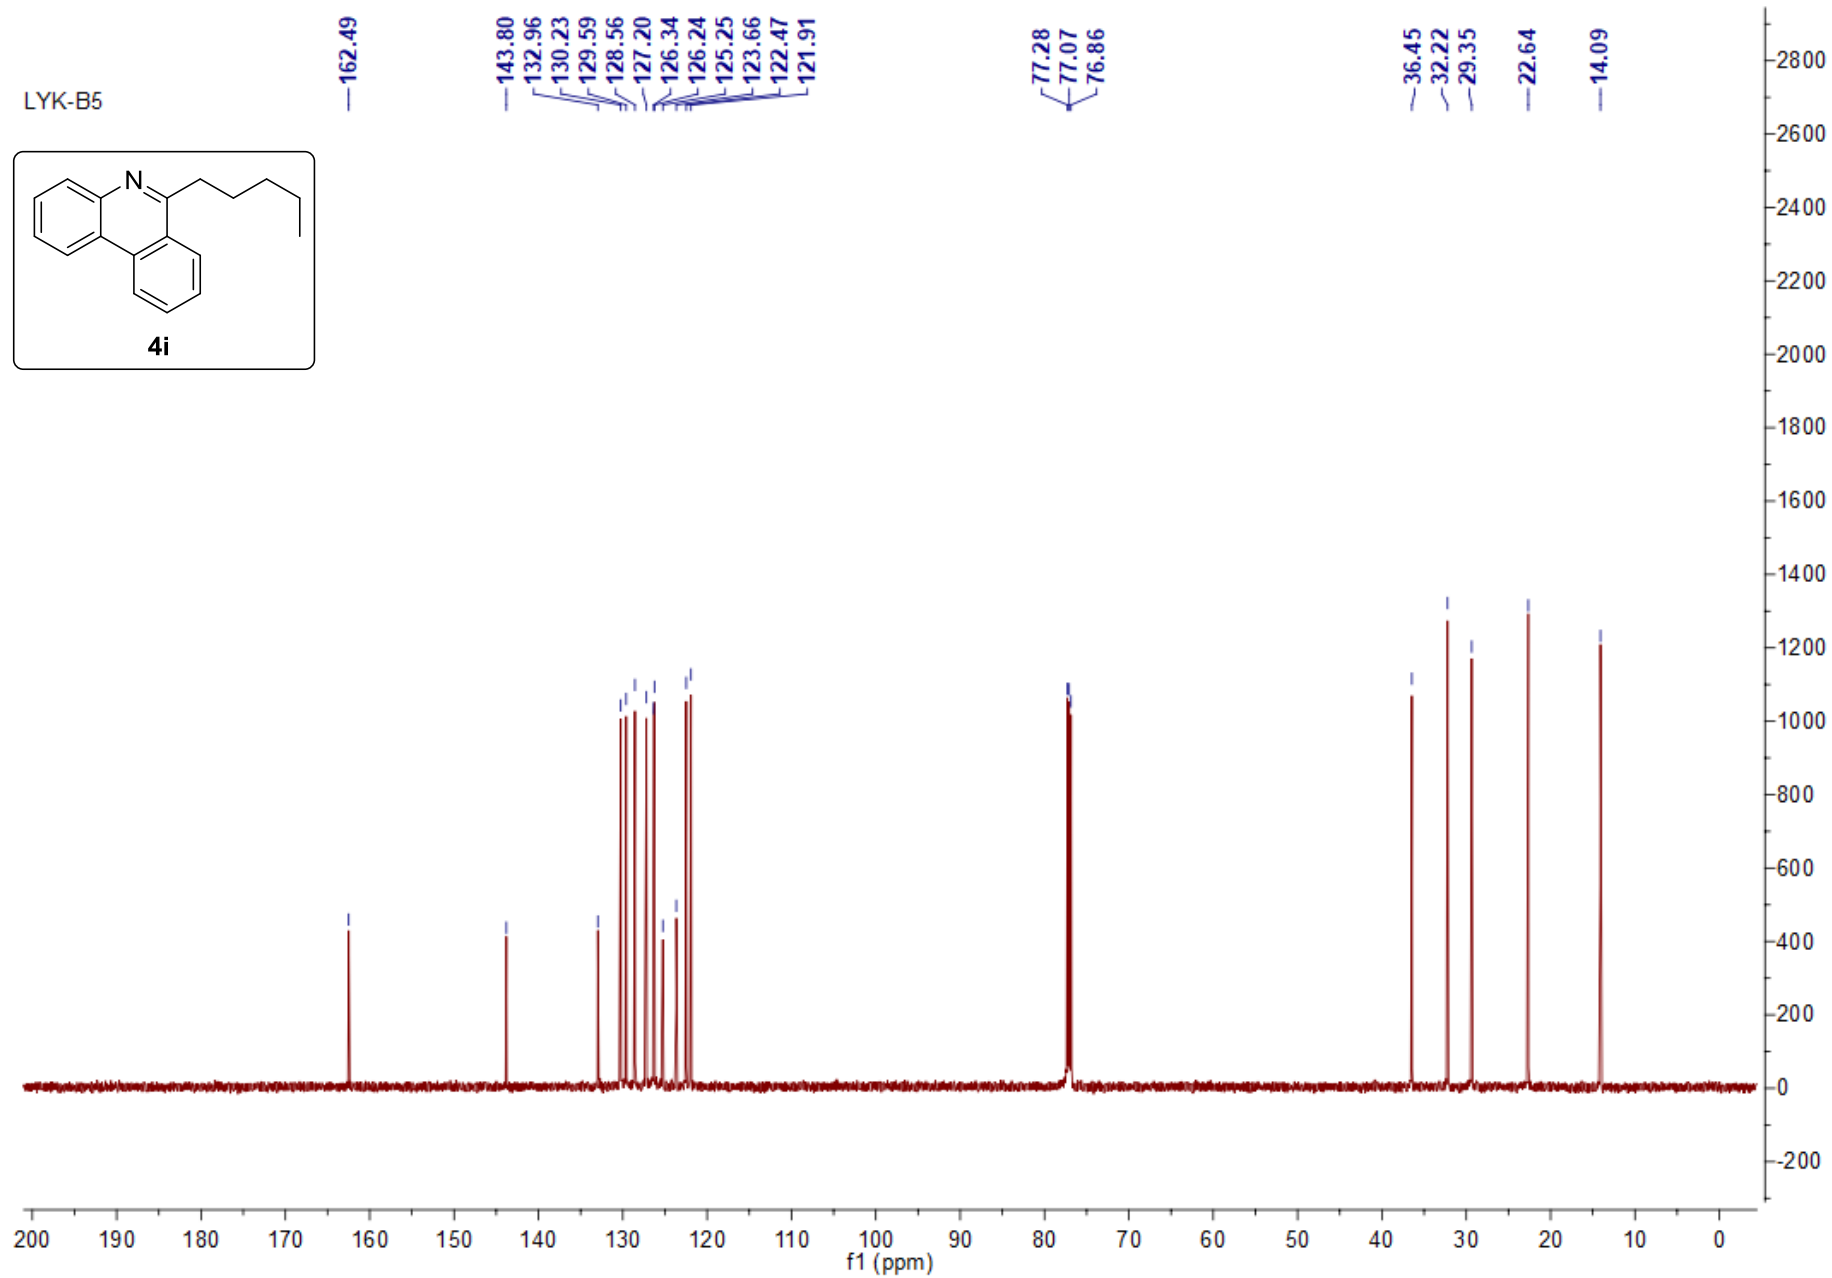

LYK-B6

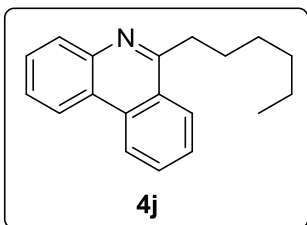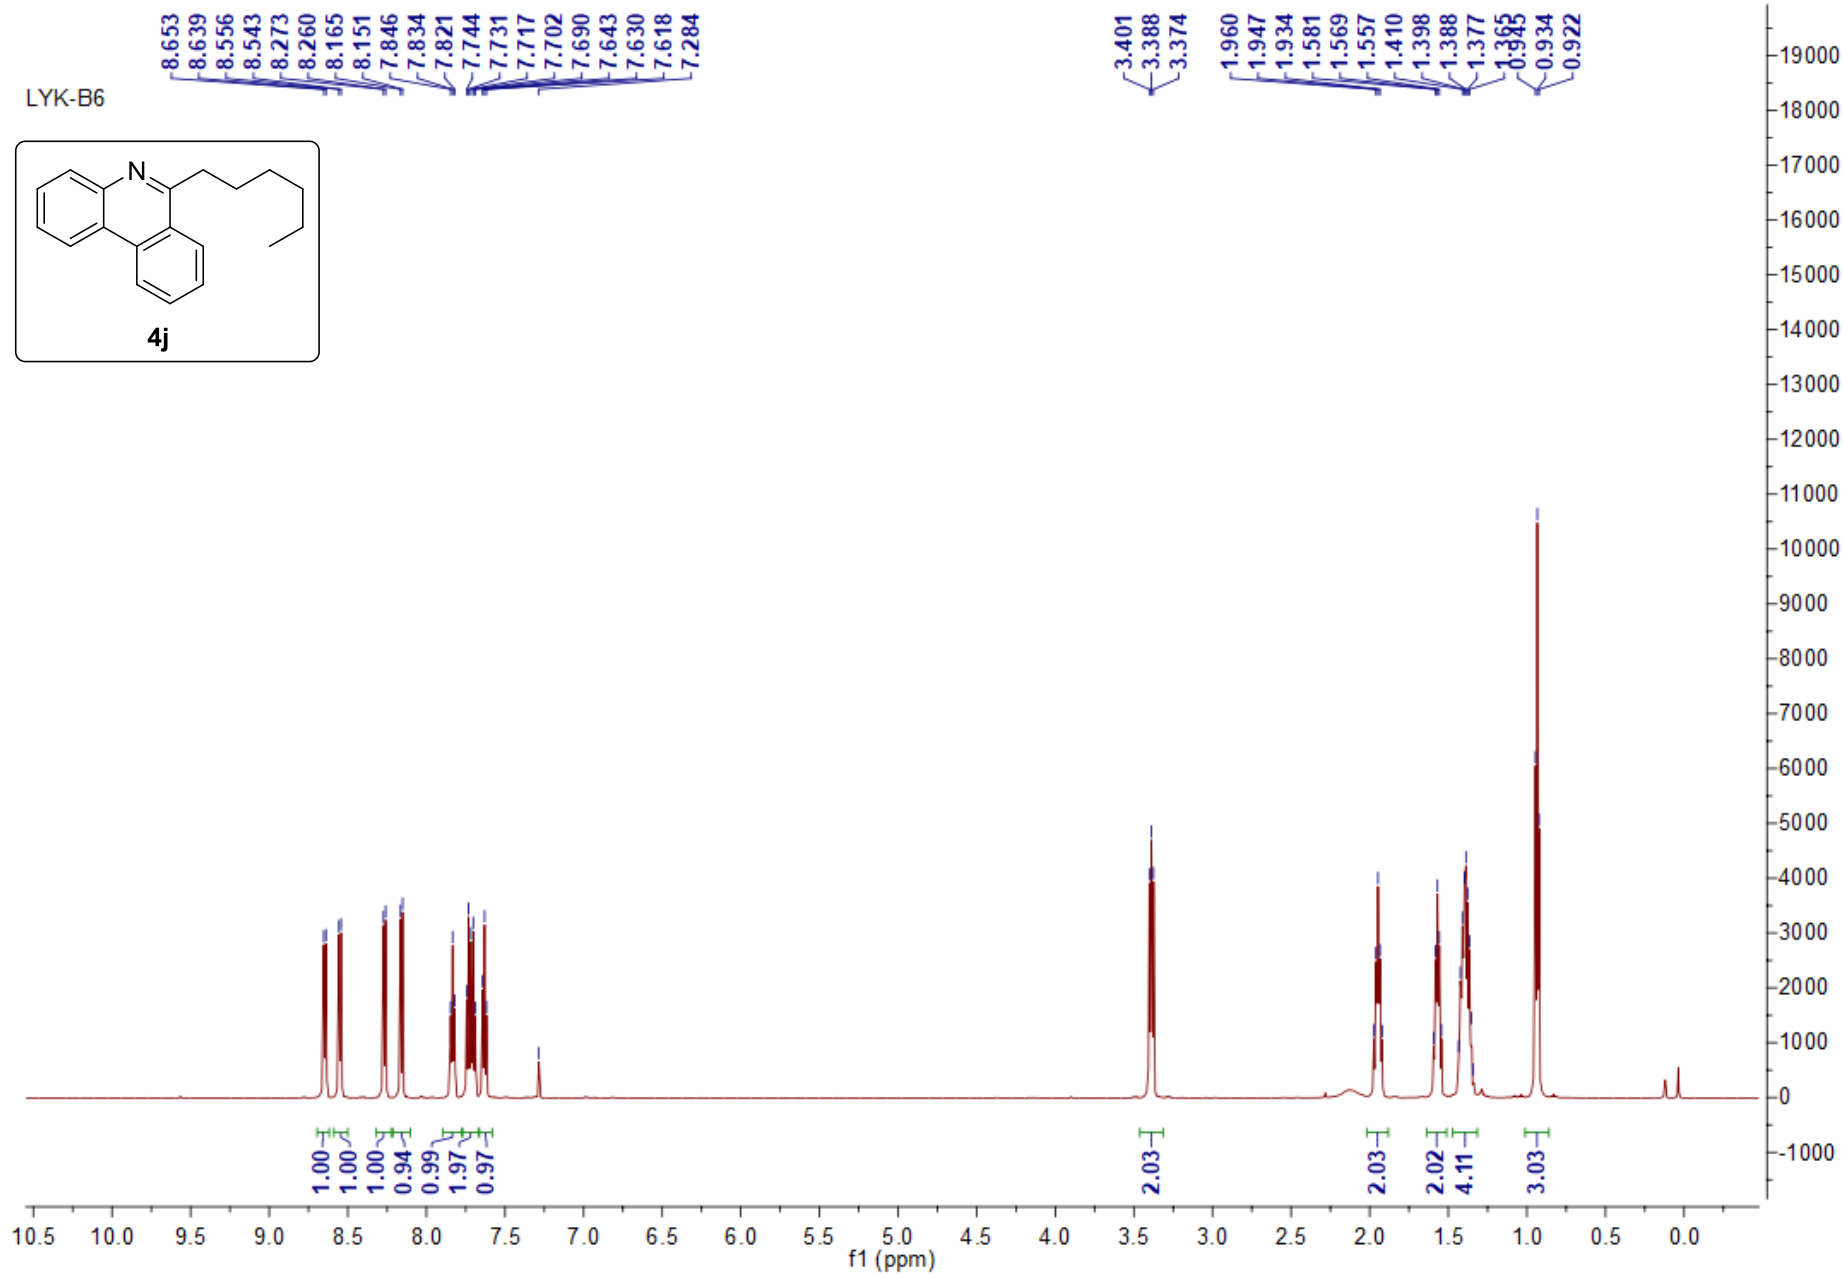

LYK-B6

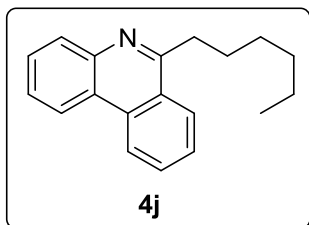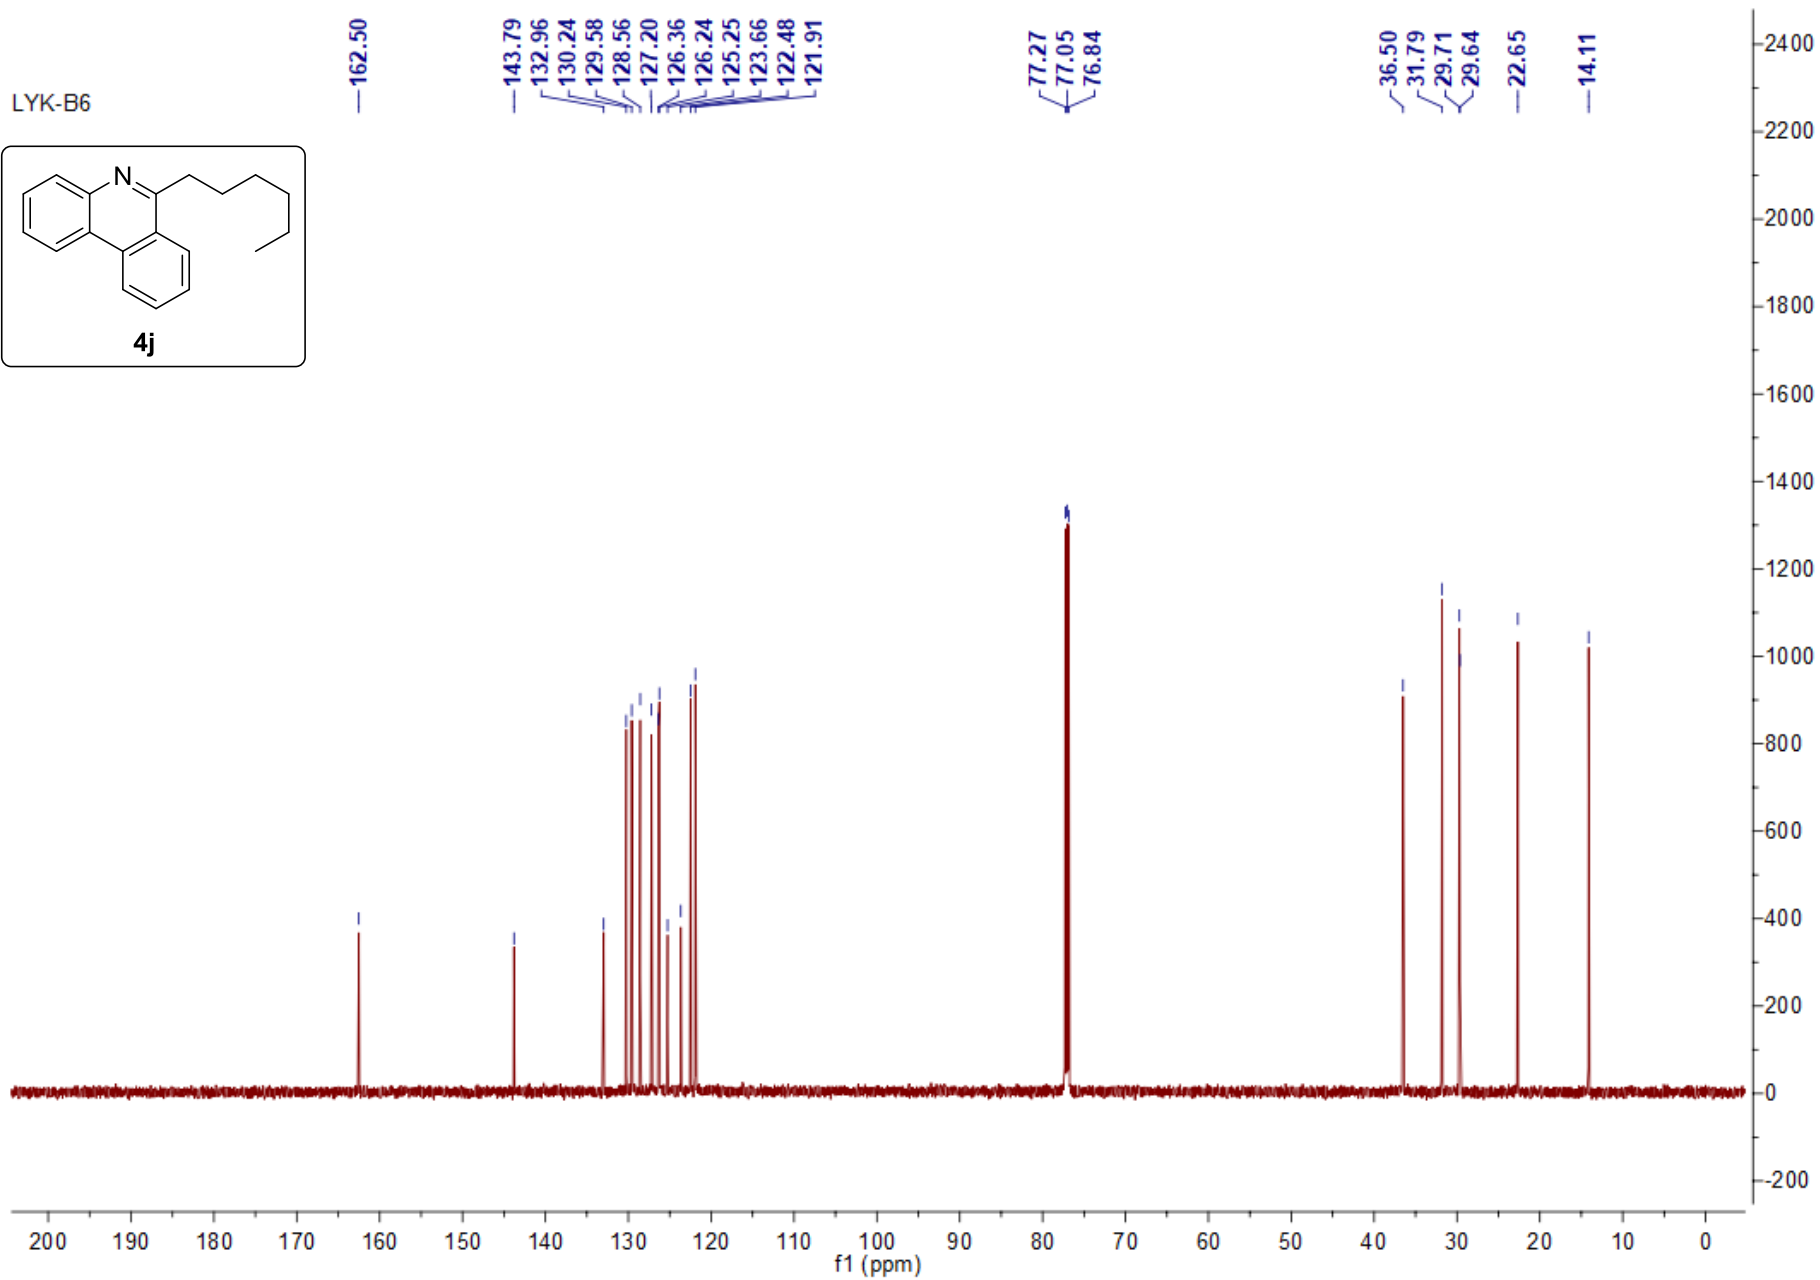

LYK-B7

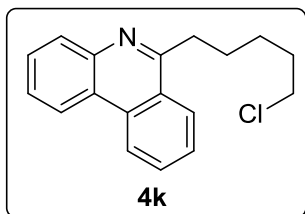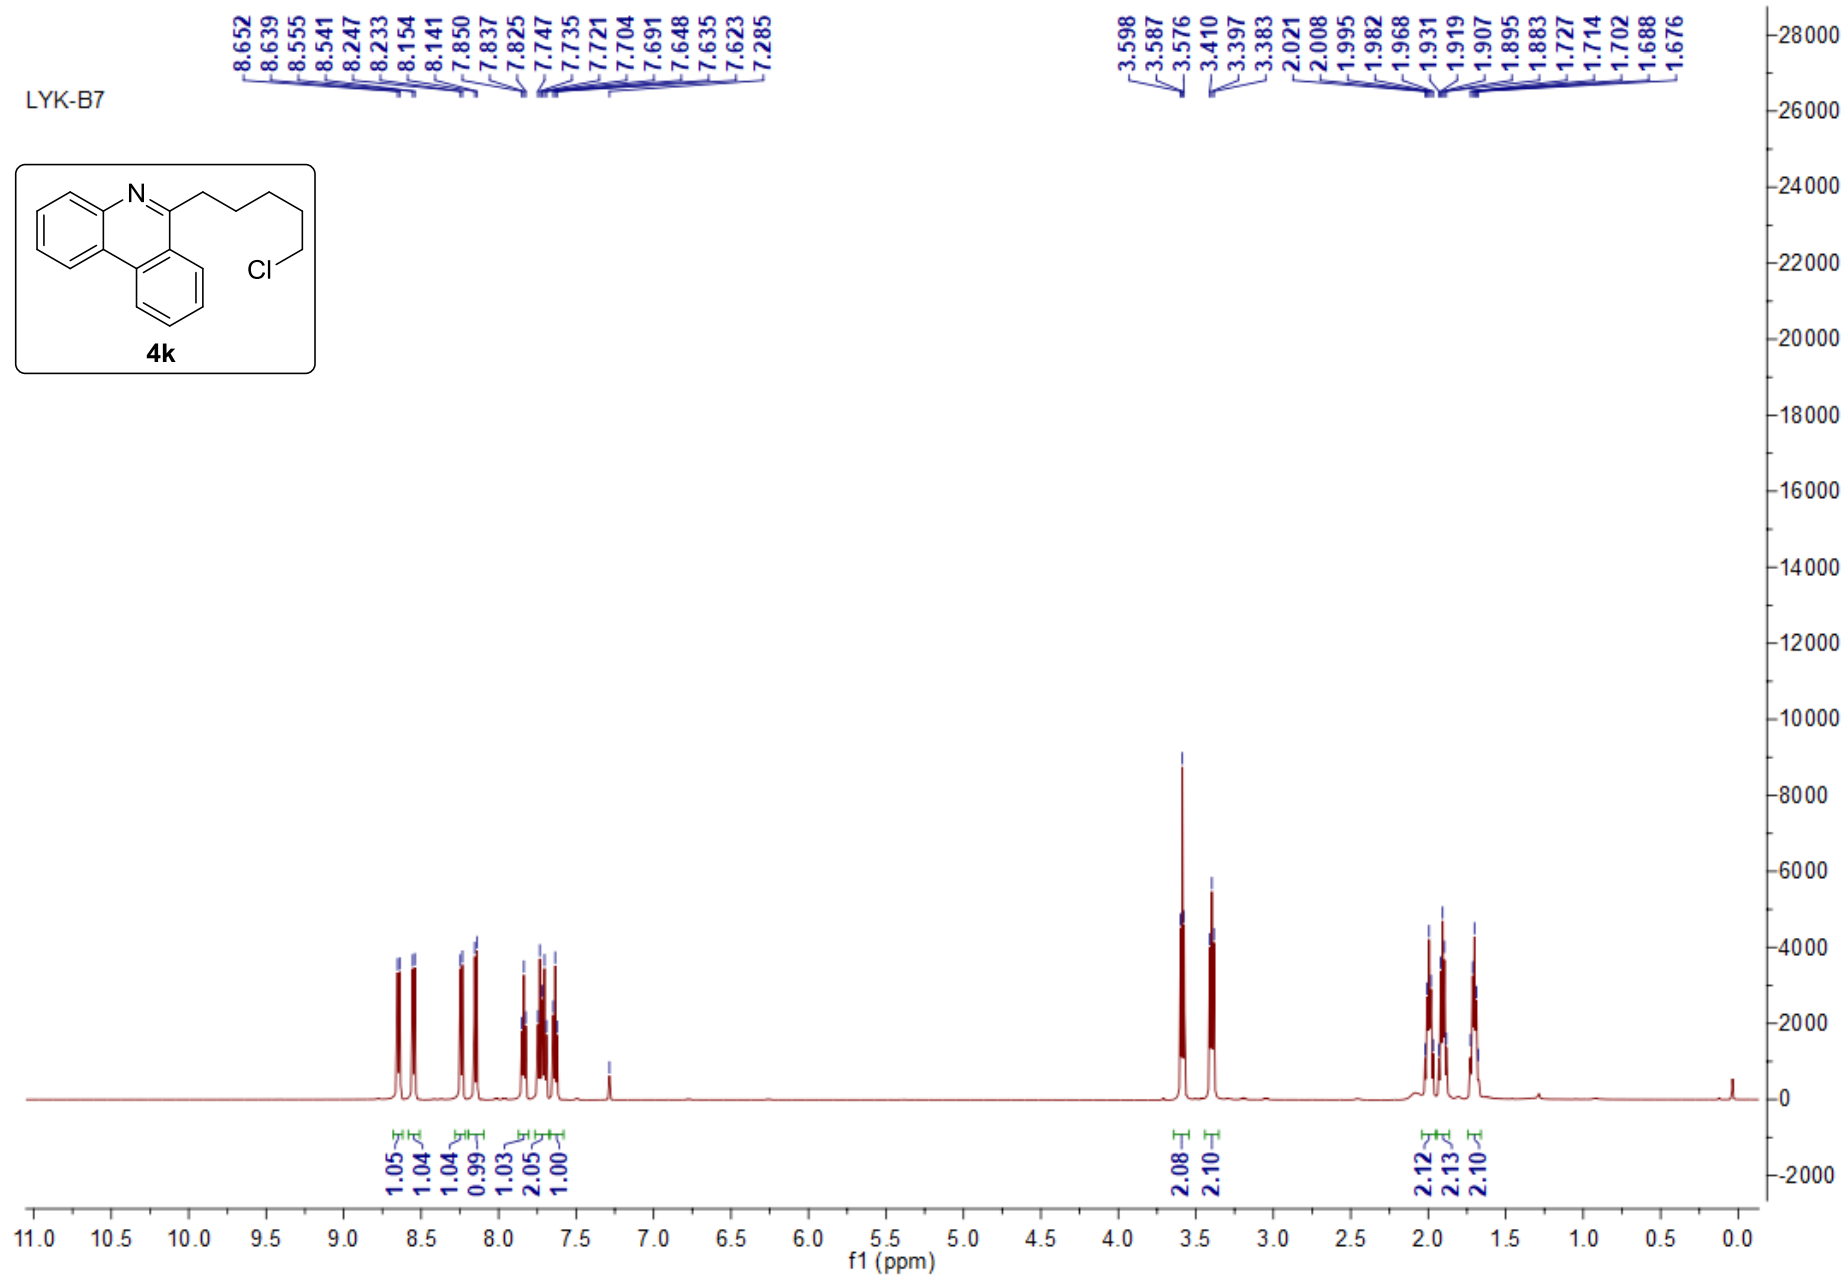

LYK-B7

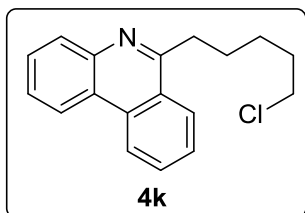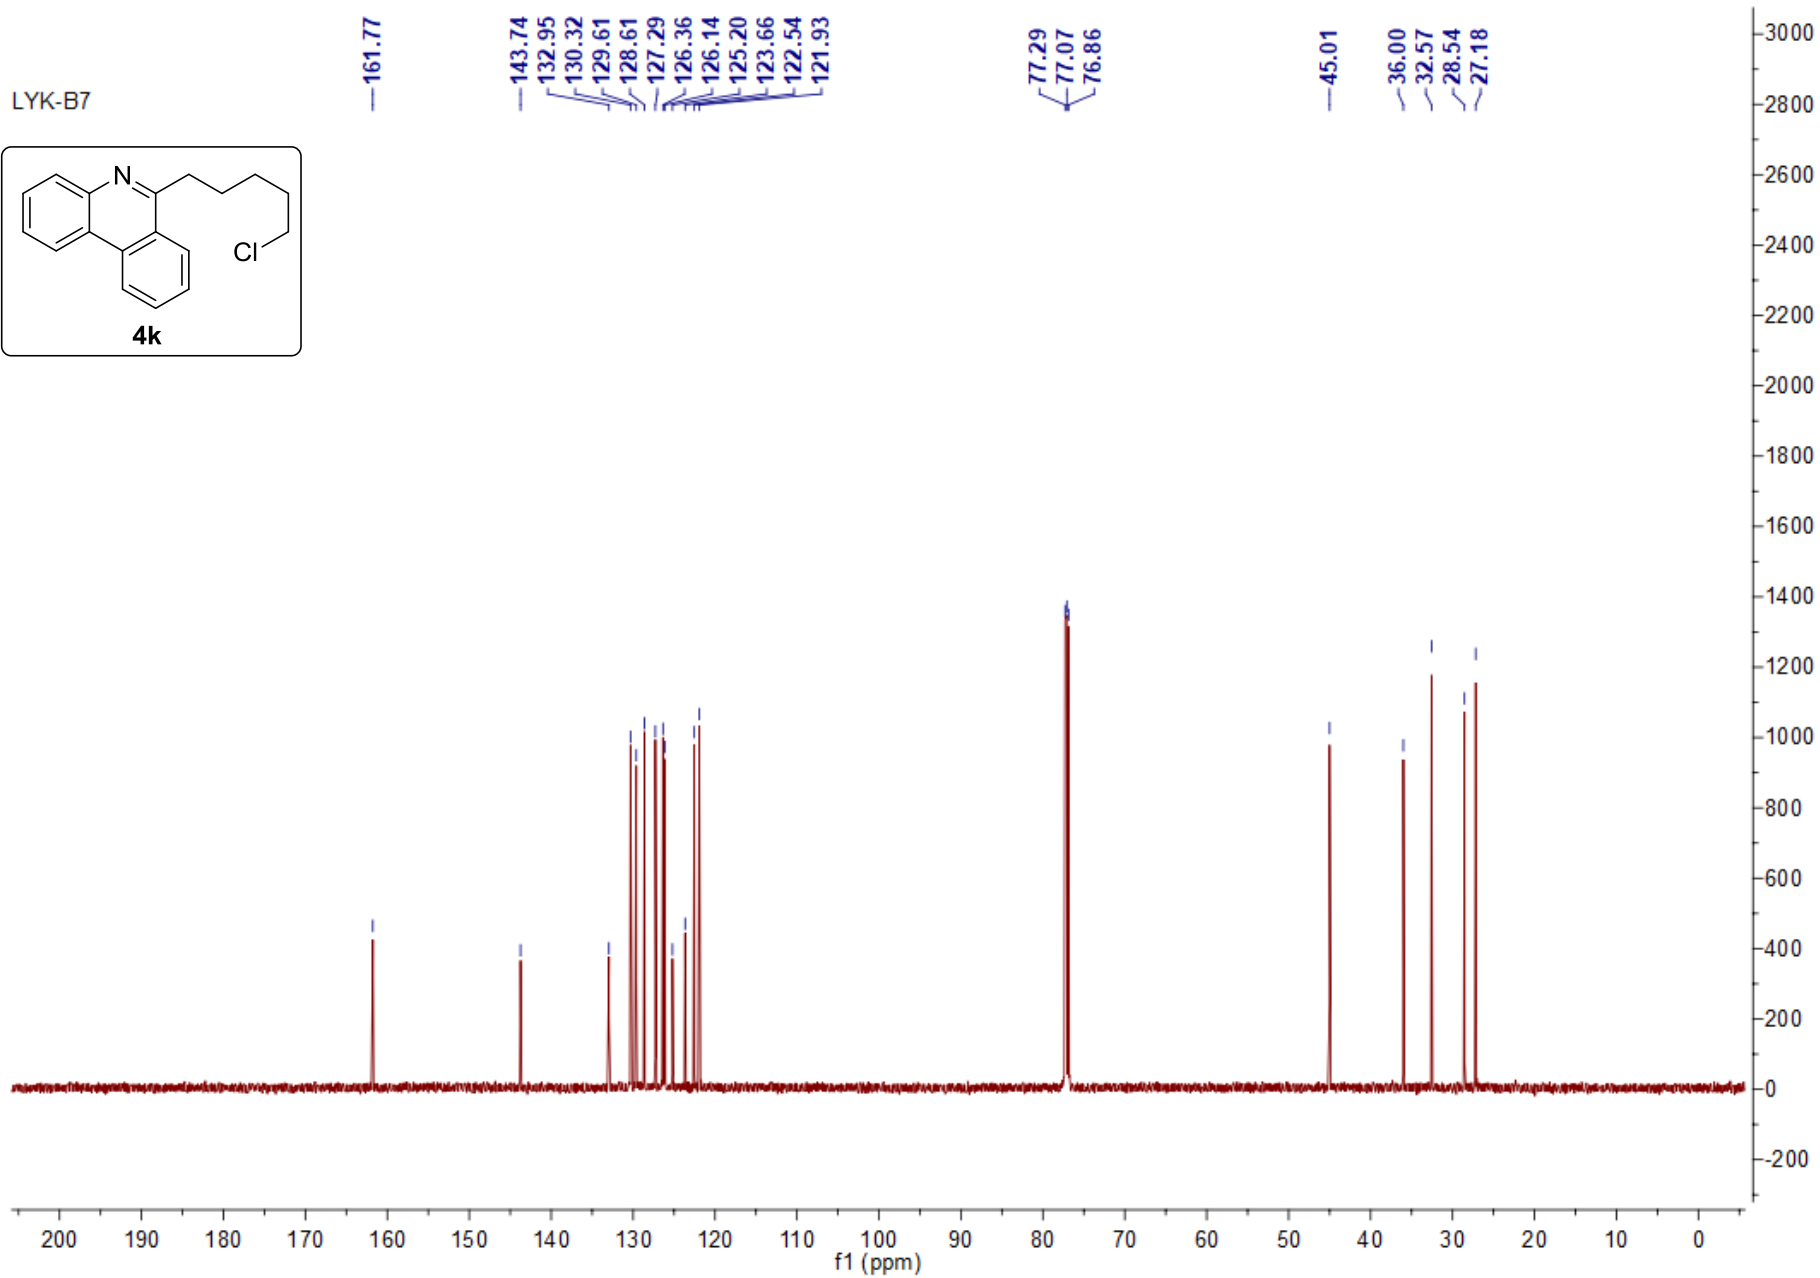

200619  
BHY-F-benbingquan CDCL3 0619

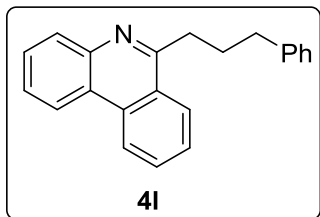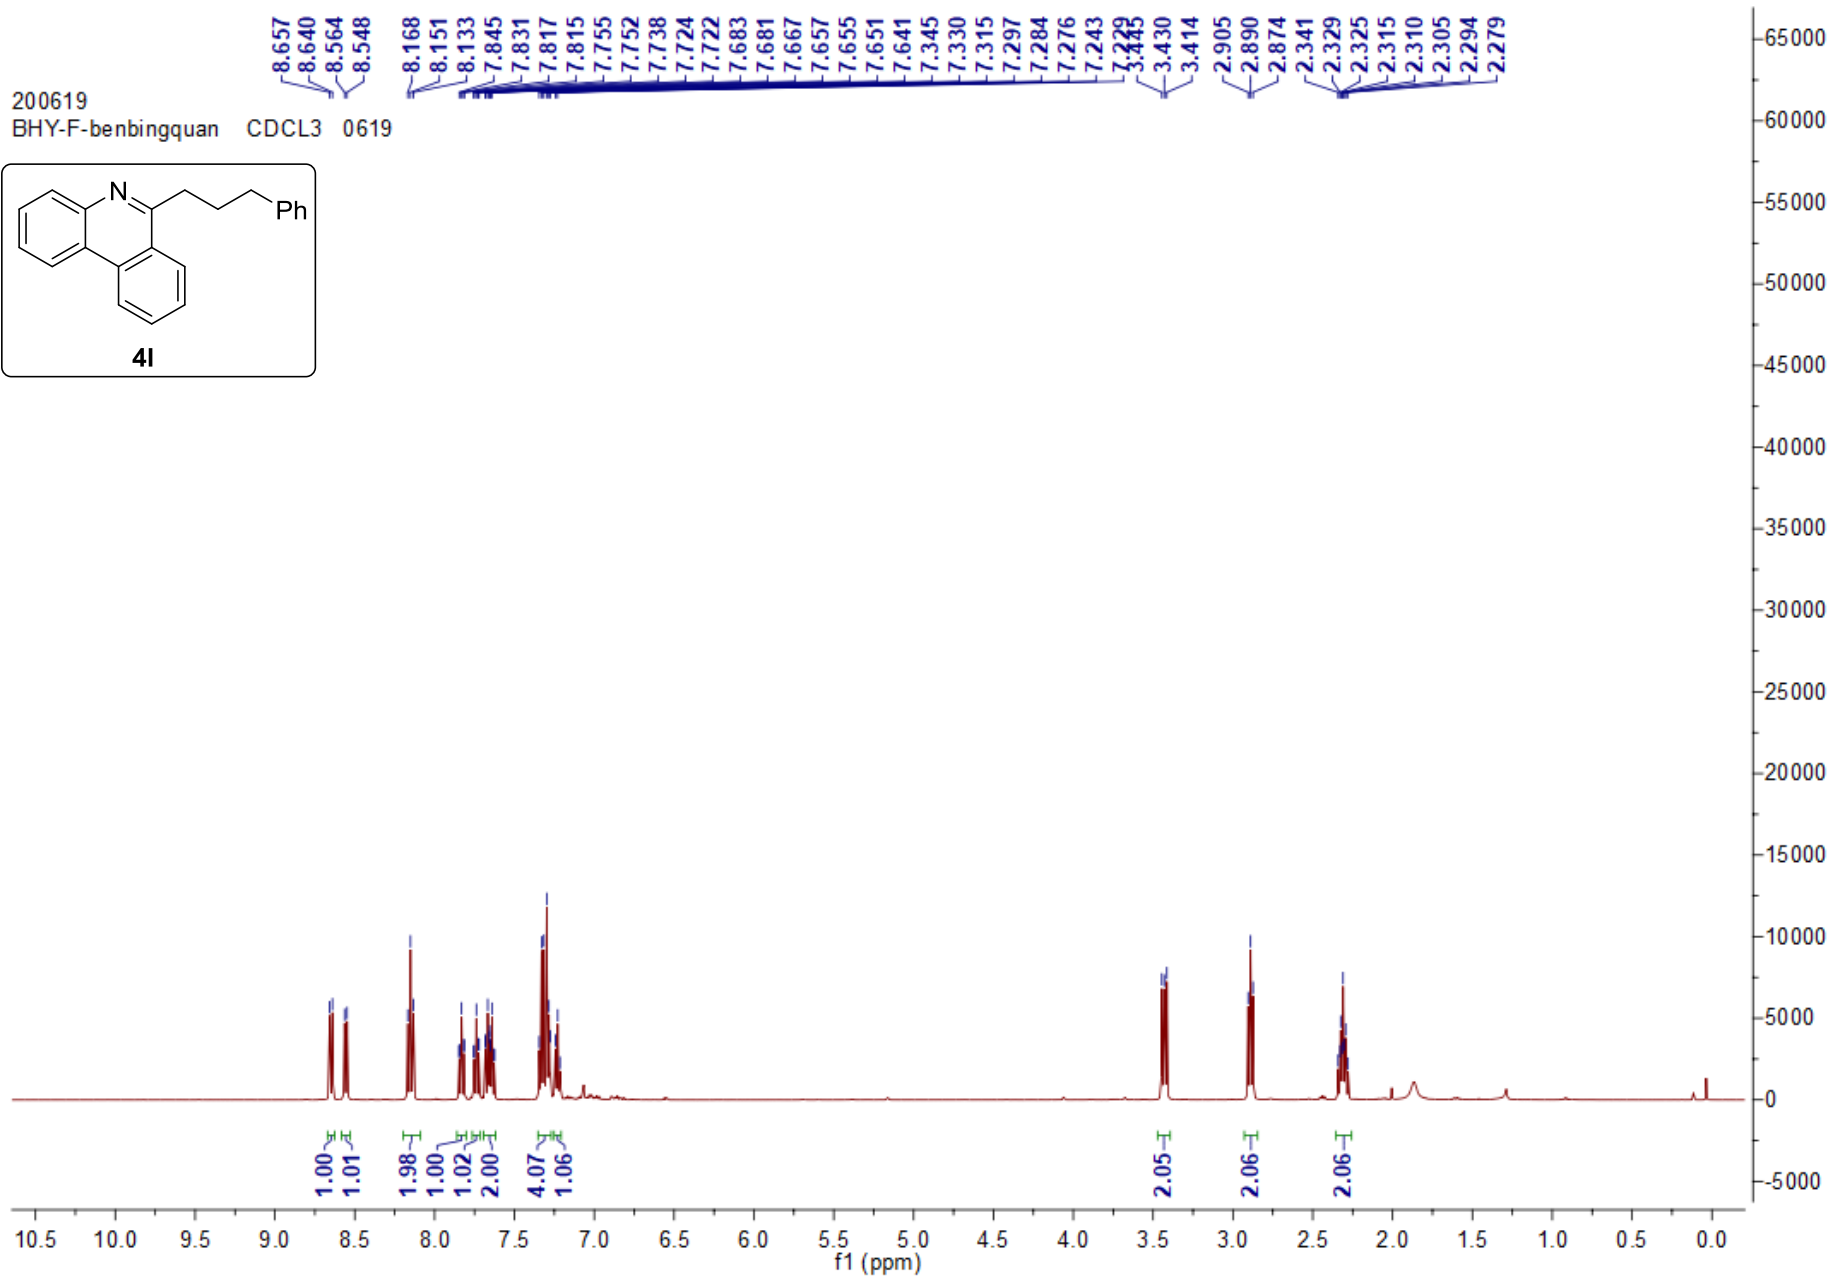

200619  
BHY-F-benbinguan CDCL3 0619

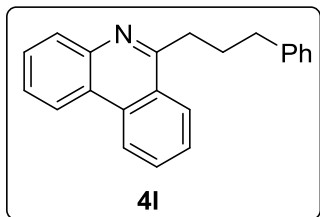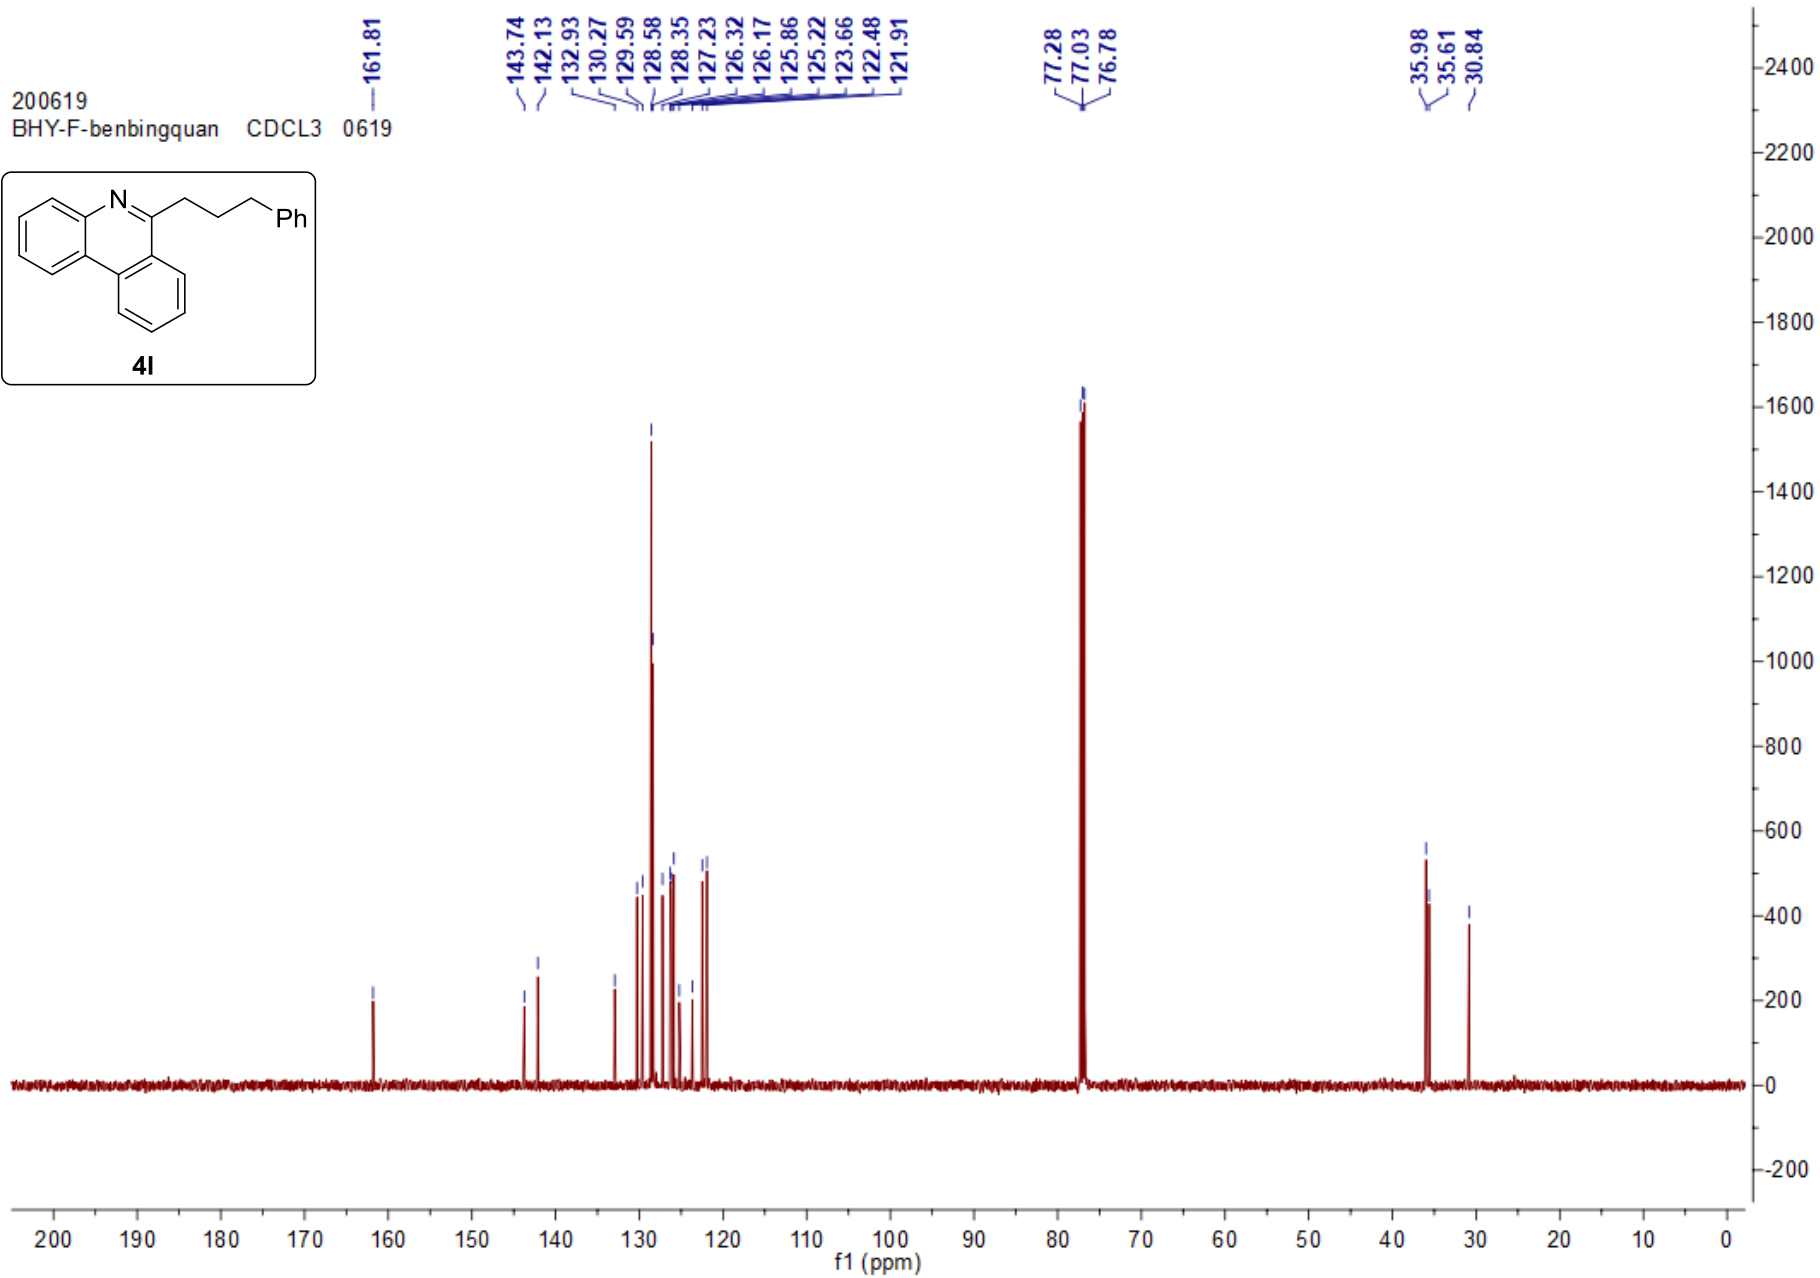



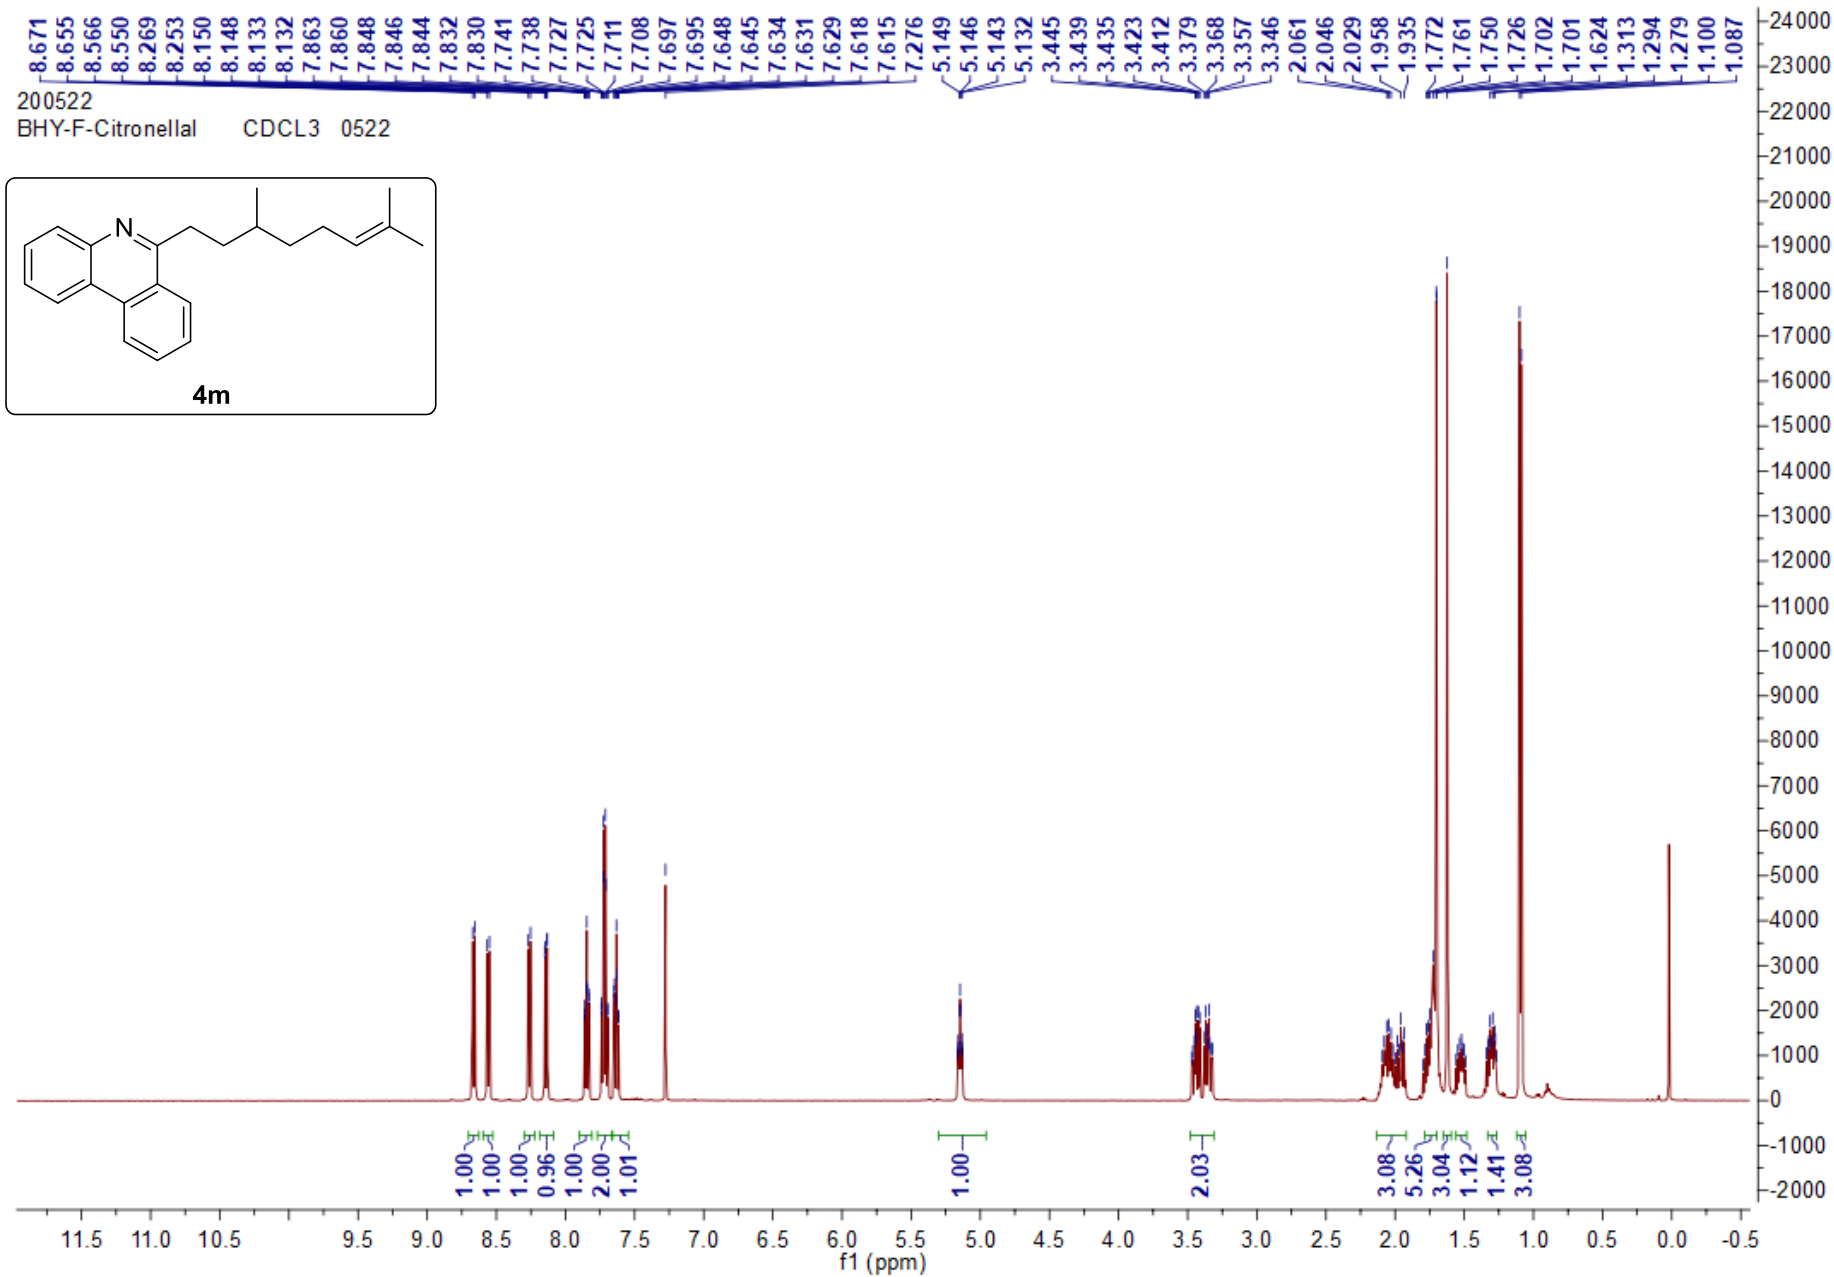

200522  
BHY-F-Citronellal CDCL3 0522

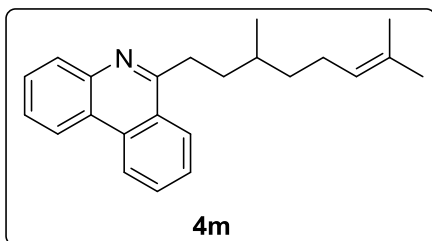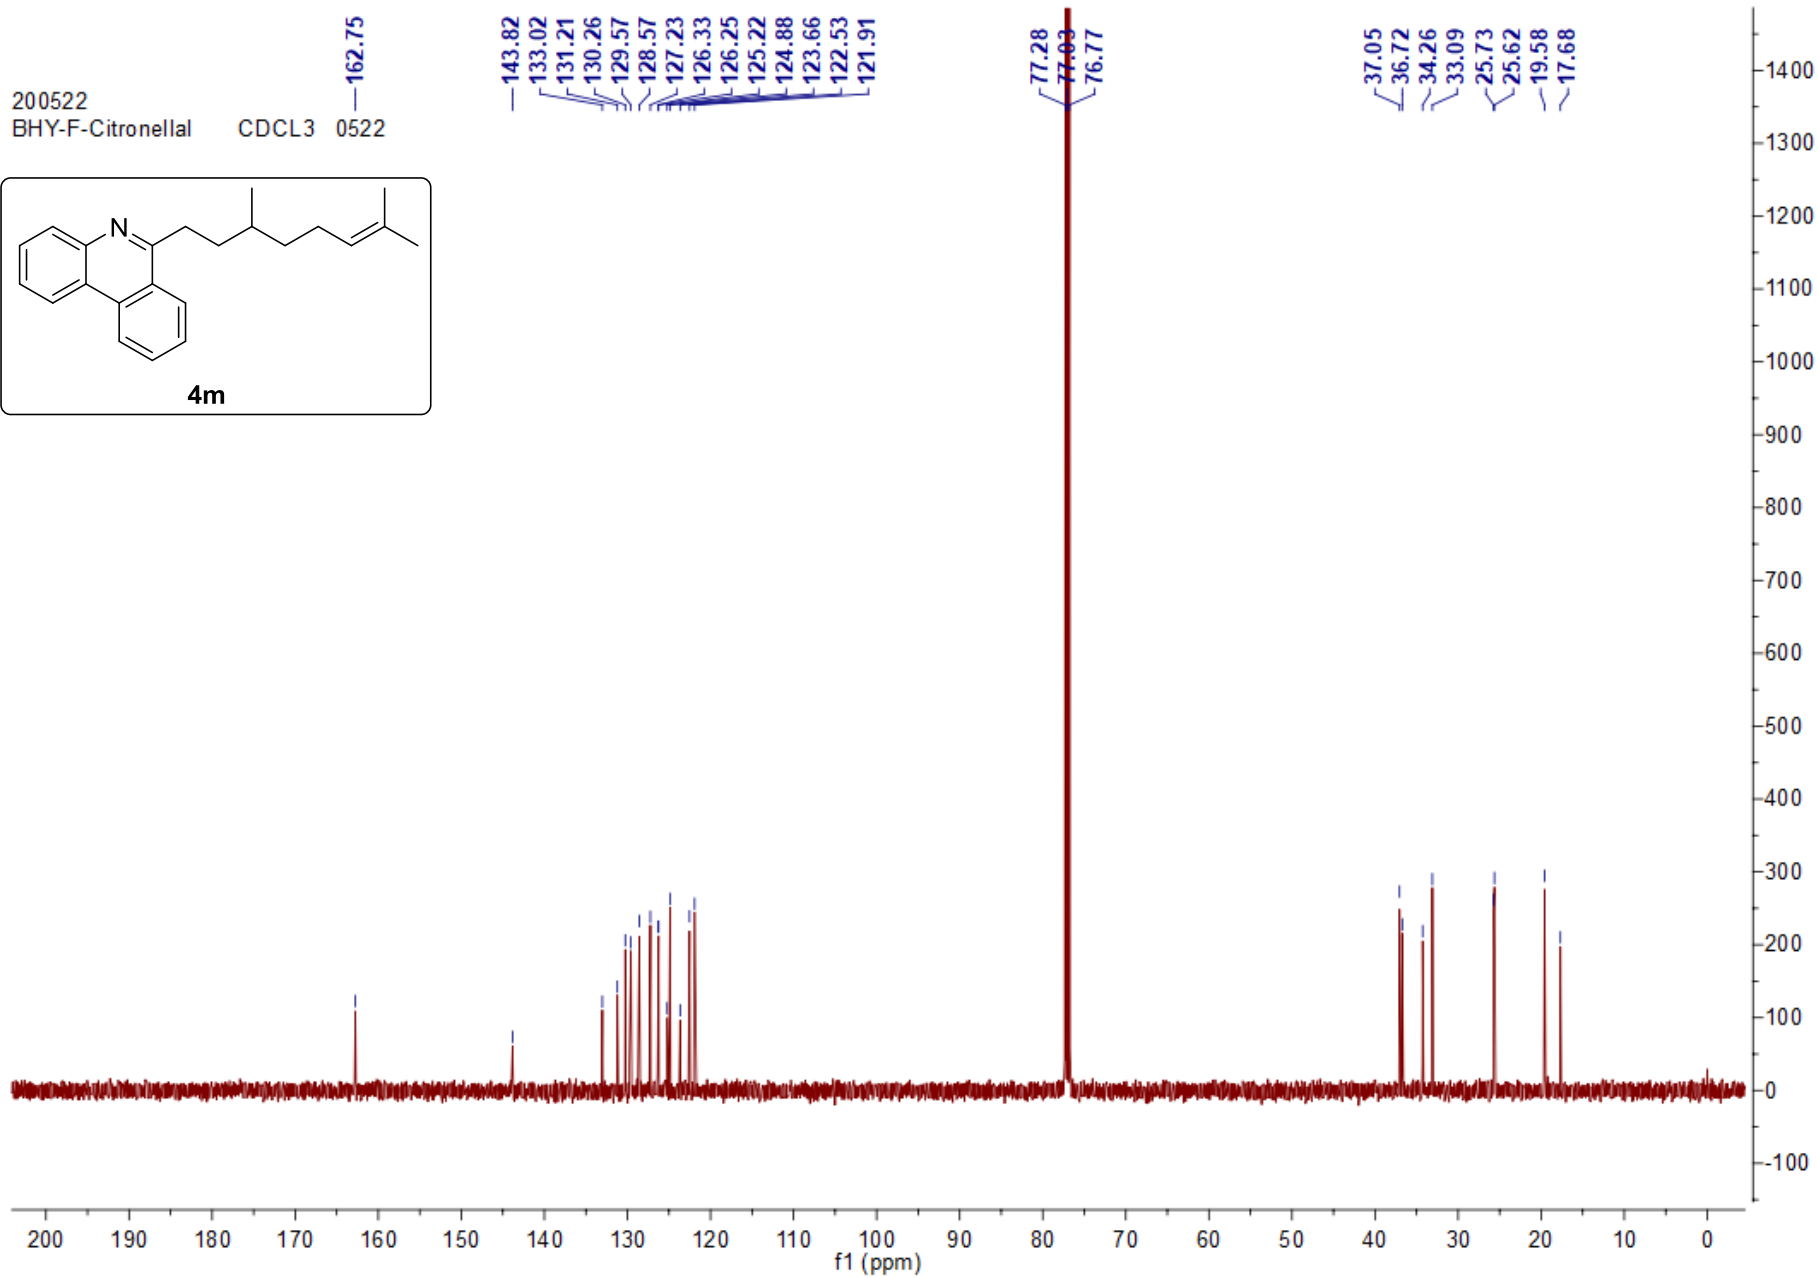

ZJ  
zlm-NC-R1-ZJ CDCl3 1216

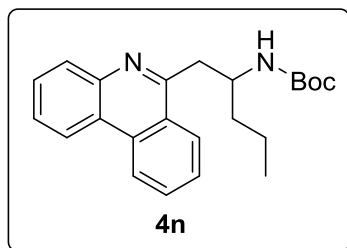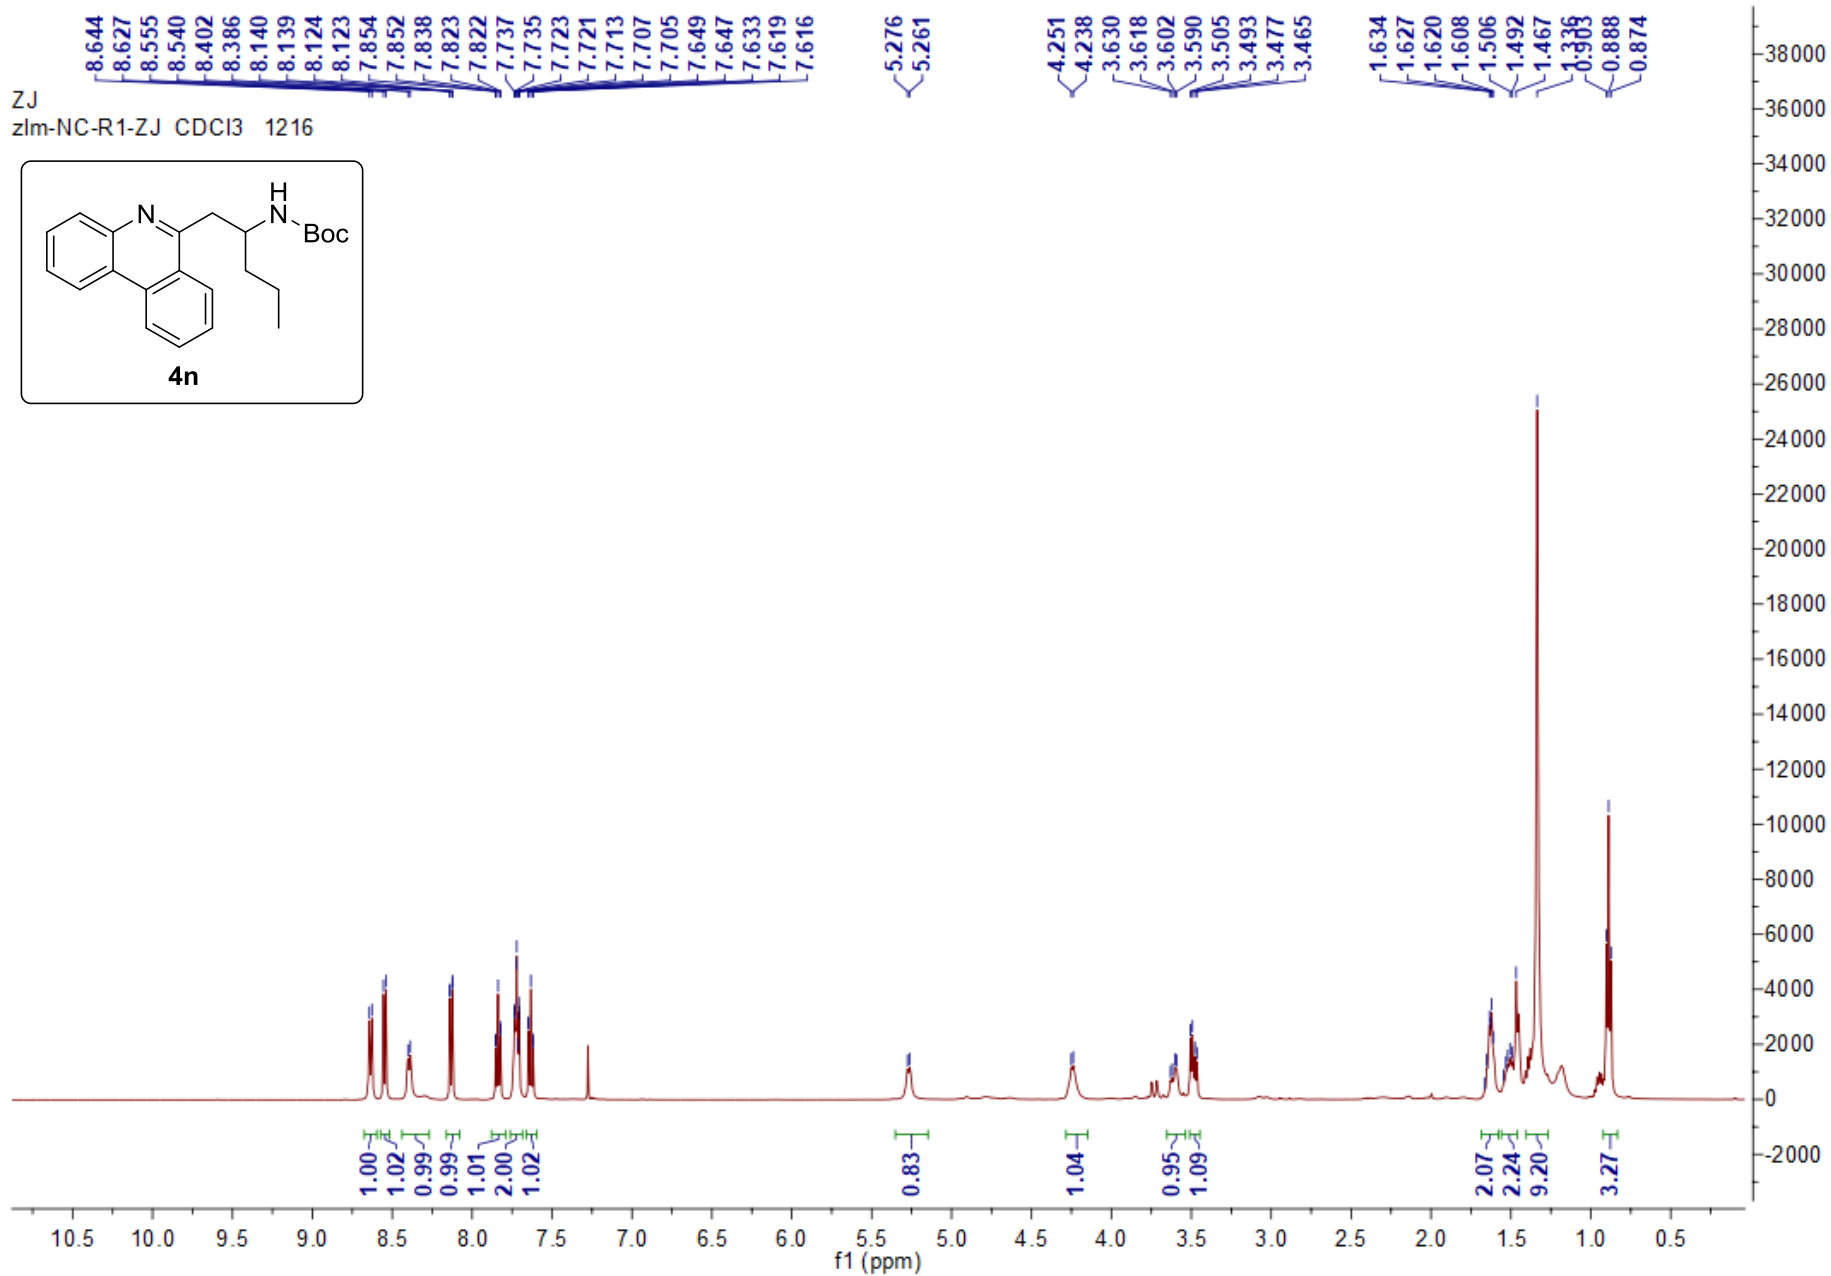

ZJ  
zlm-NC-ZJ CDCI3 0125

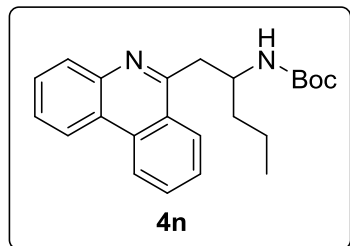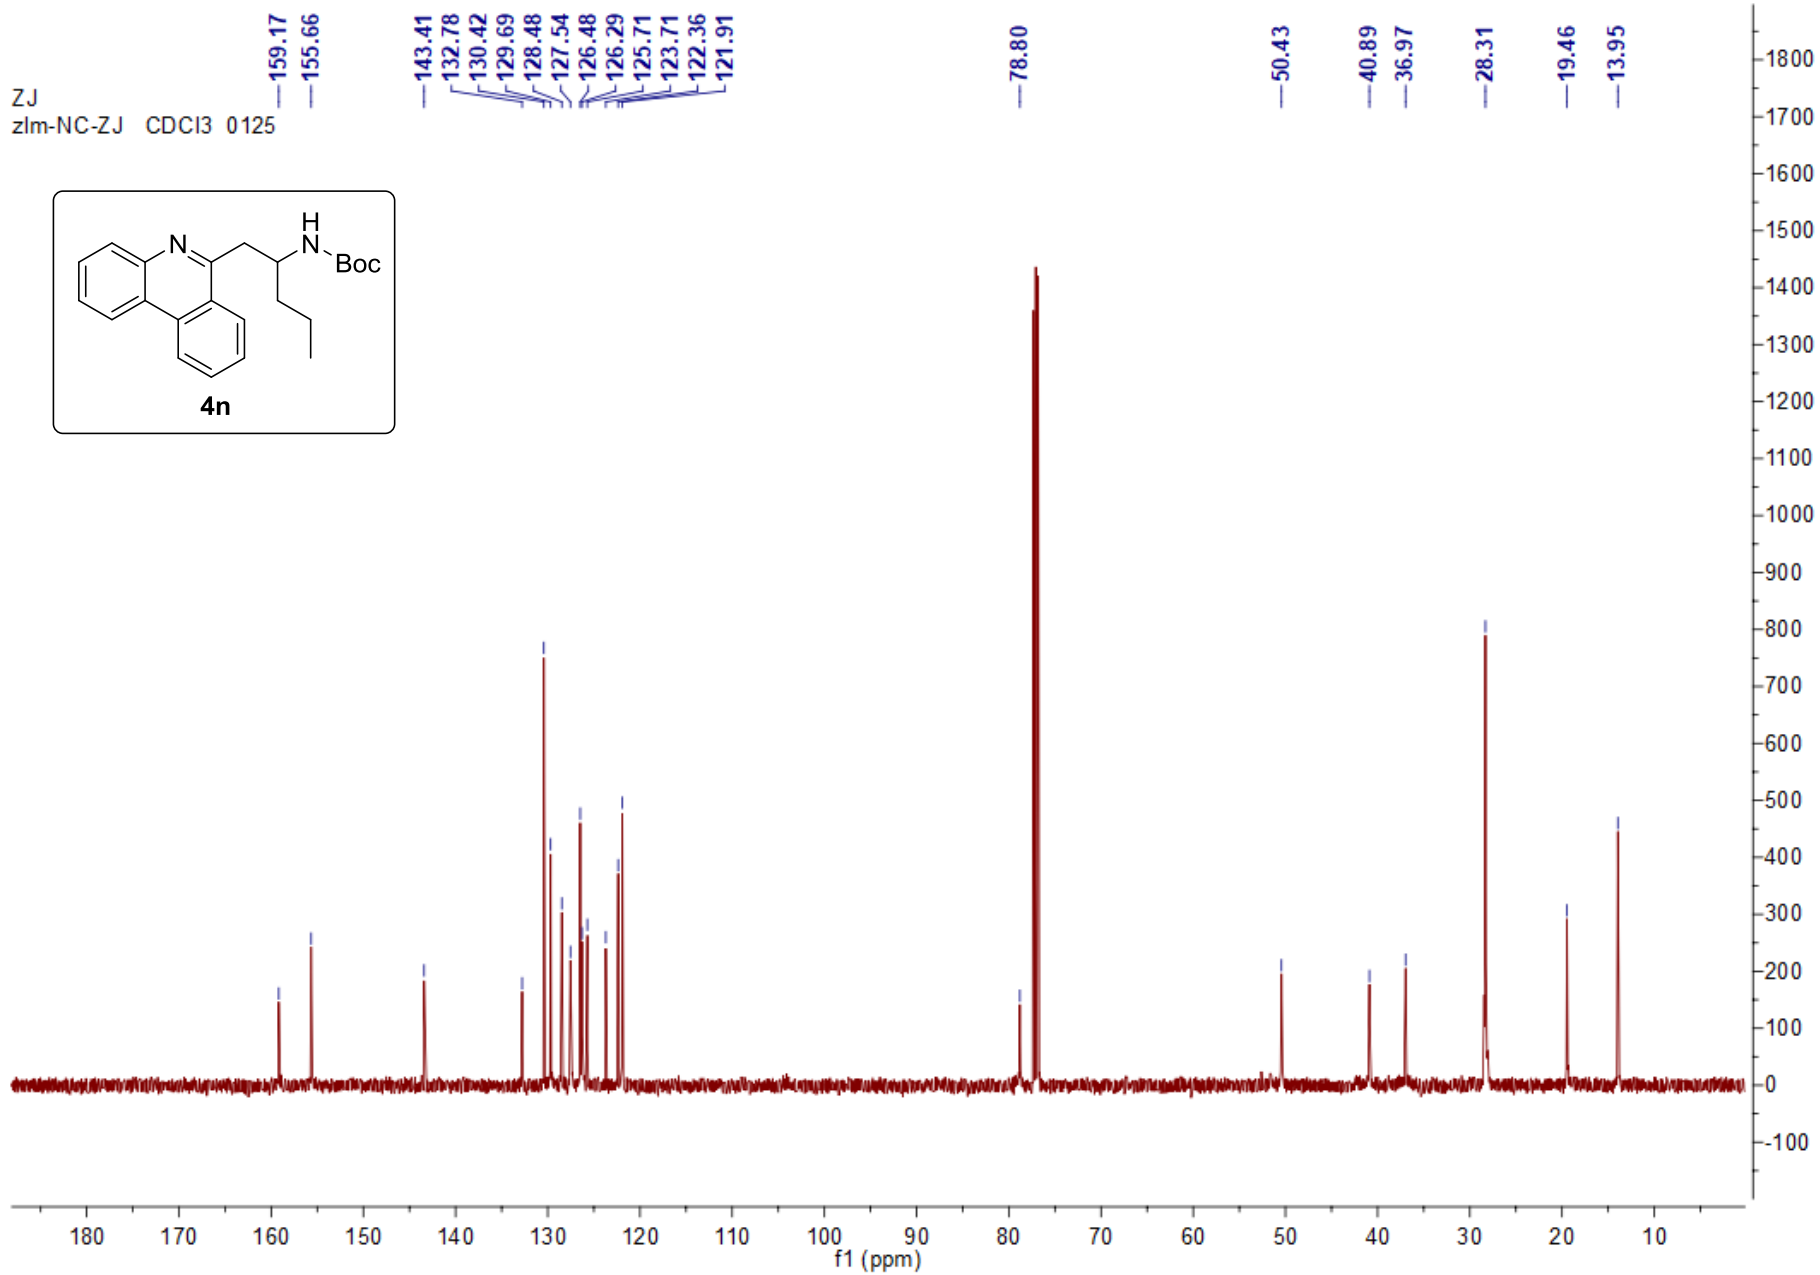

200723  
zlm-NC-D CDCL3 0723

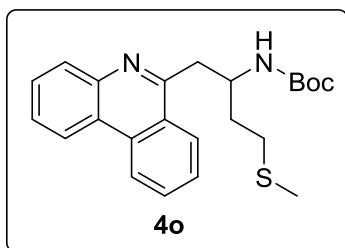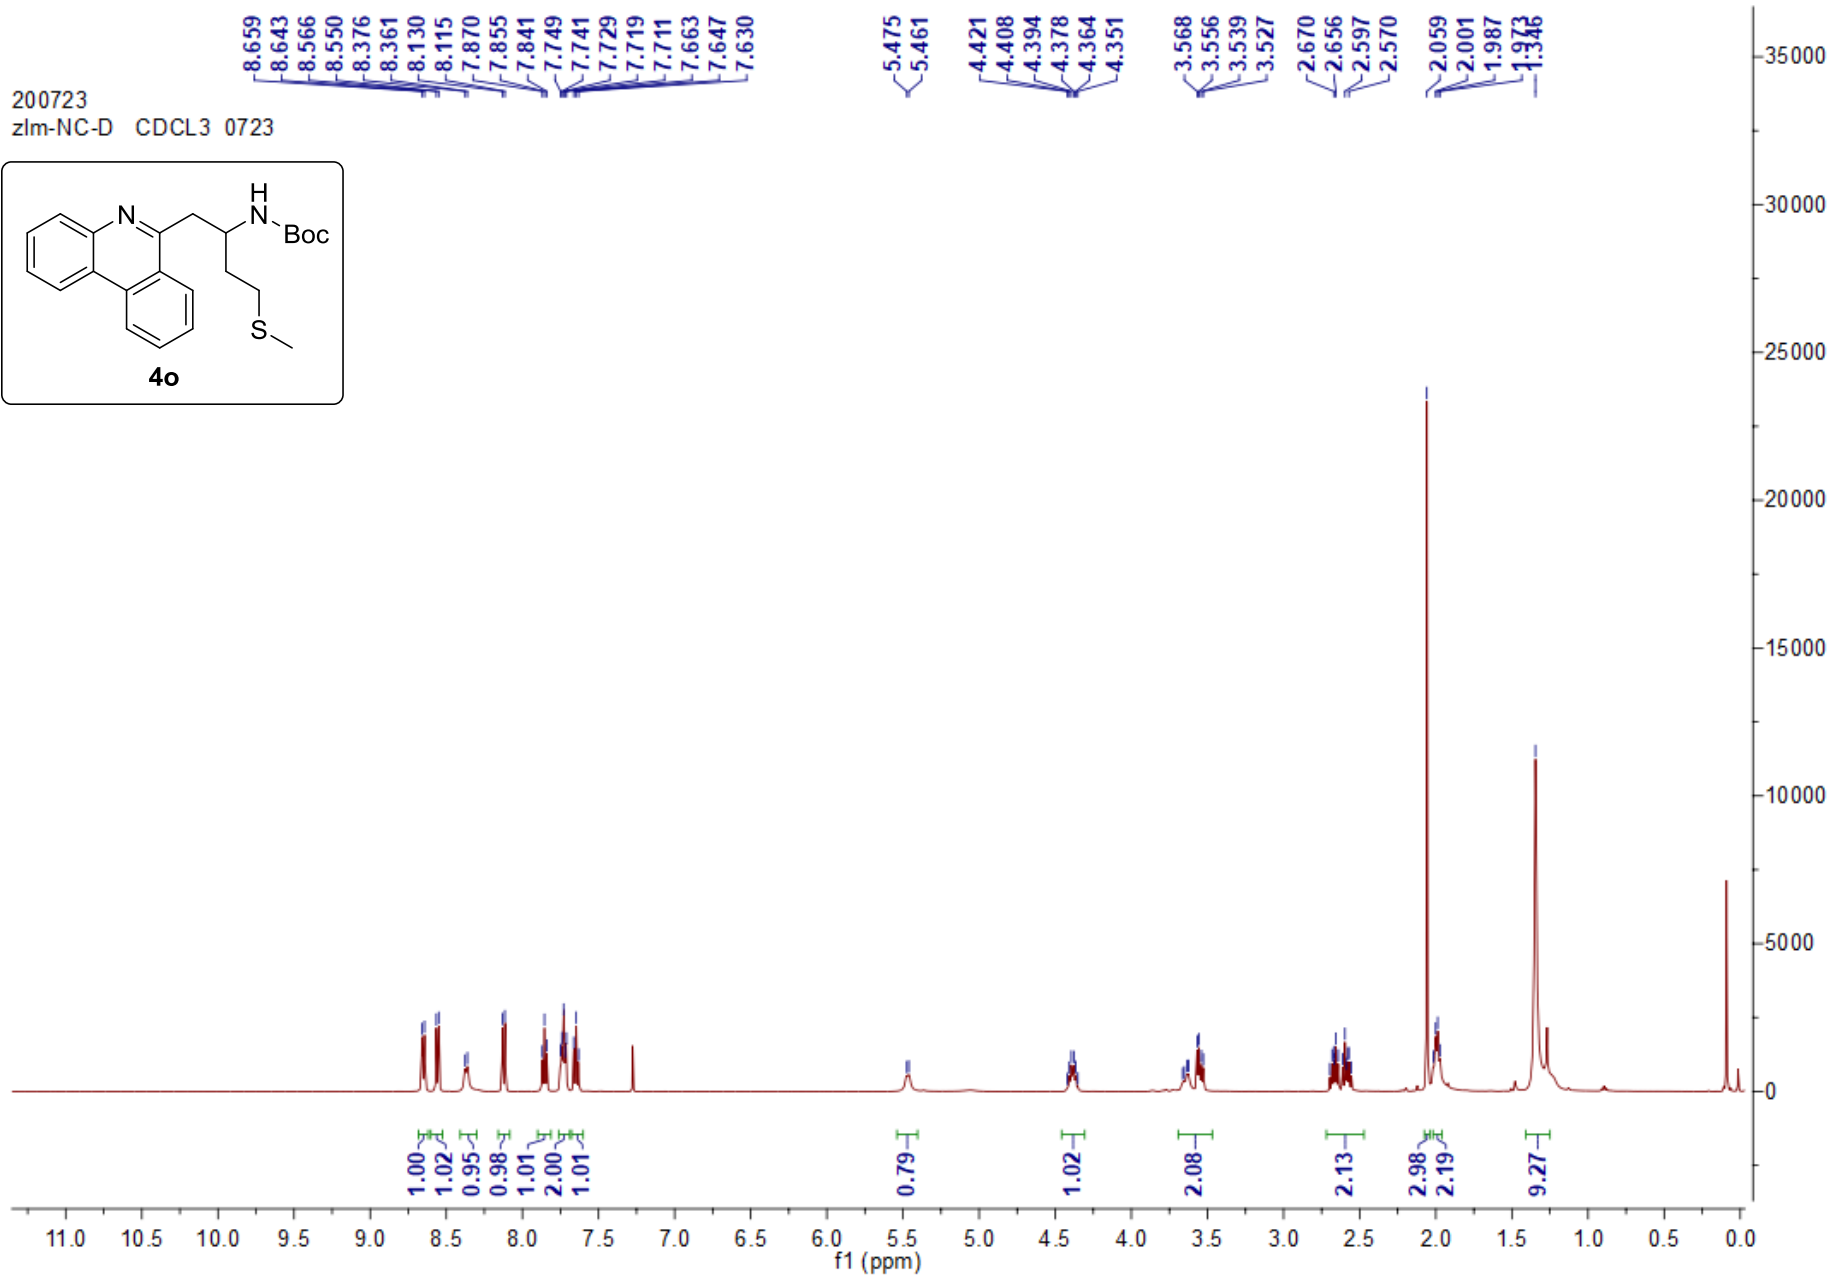

200728  
zlm-NC-D CDCl3 0728

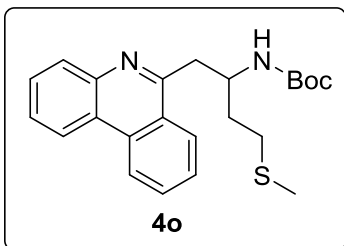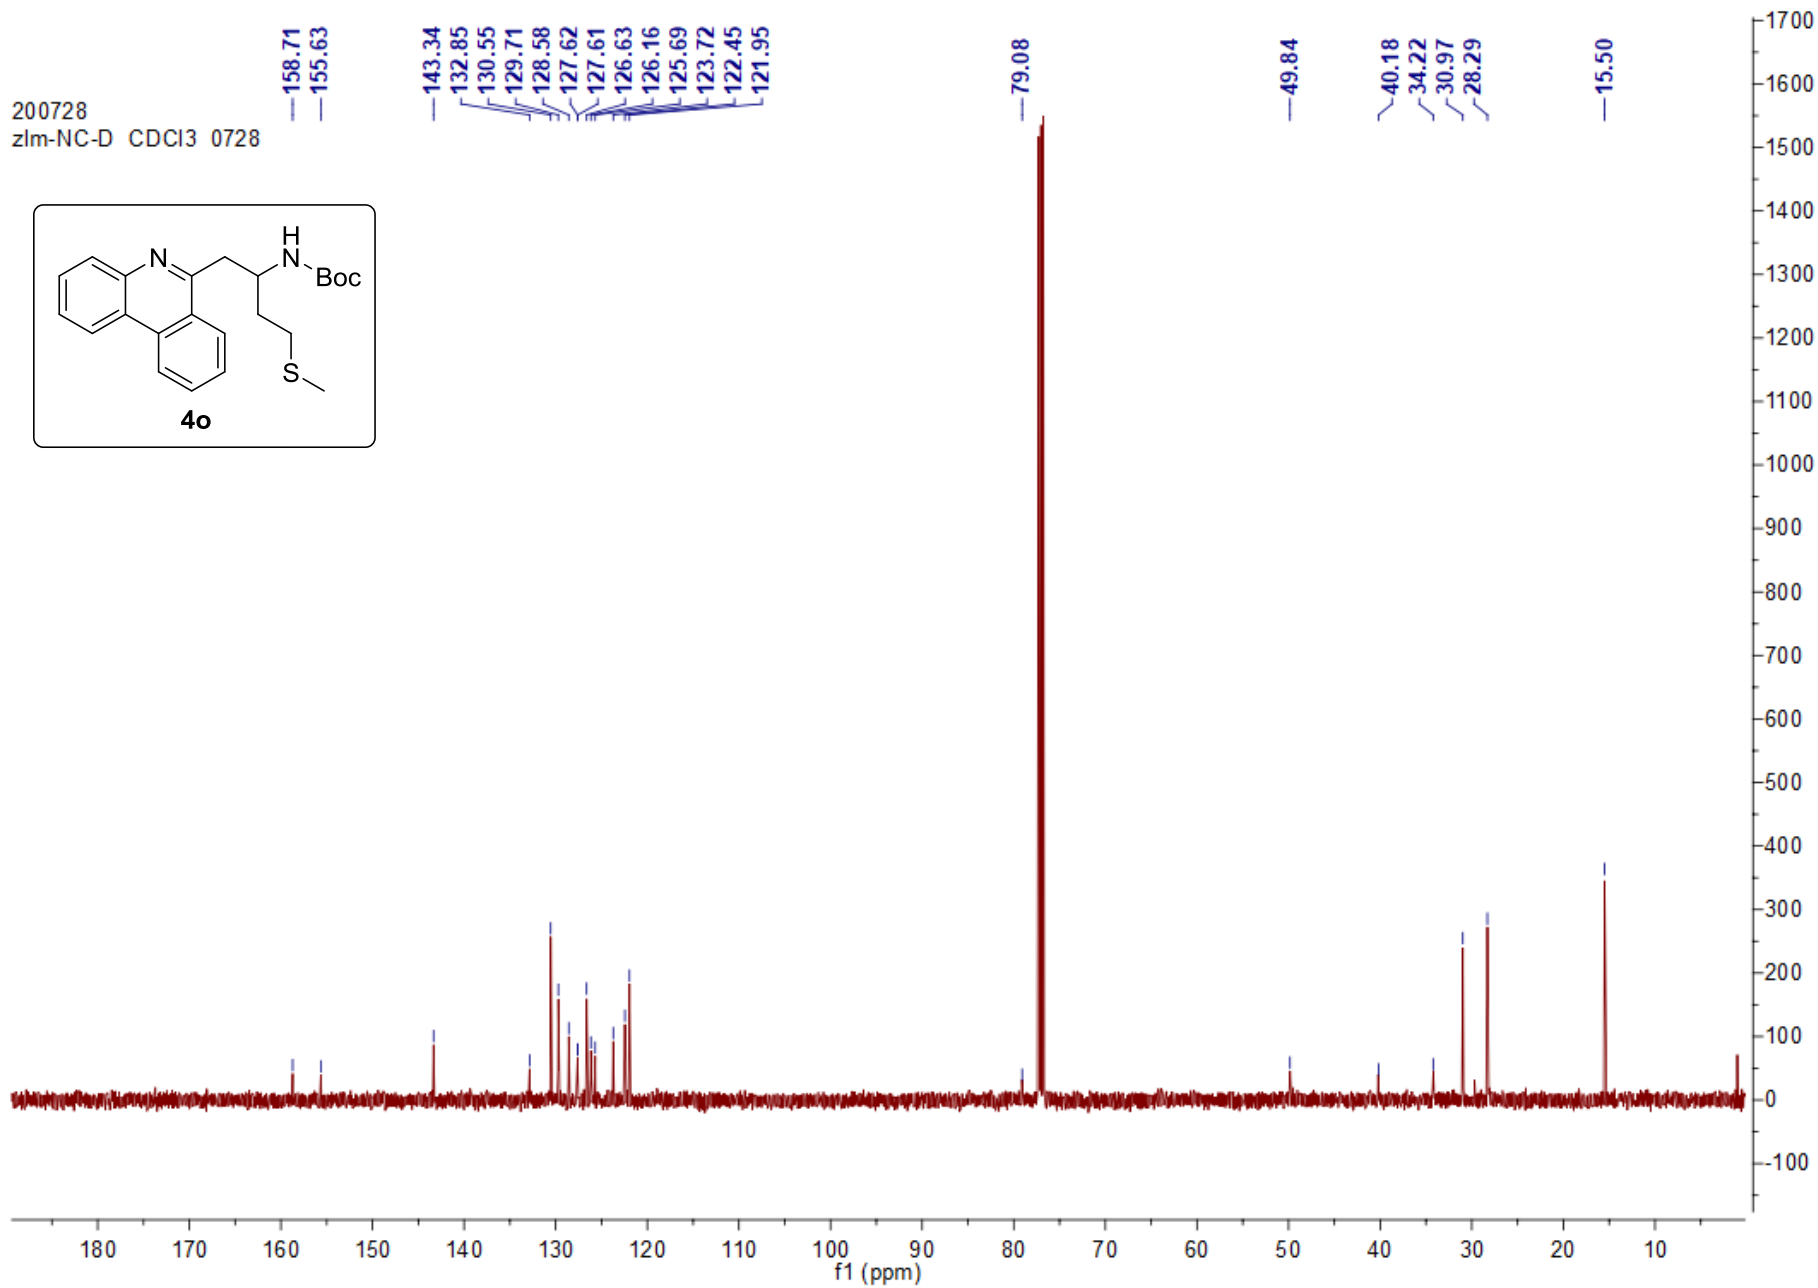

LYK-B8

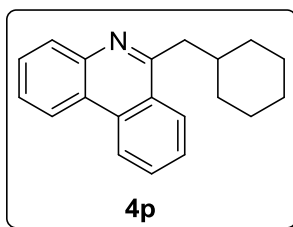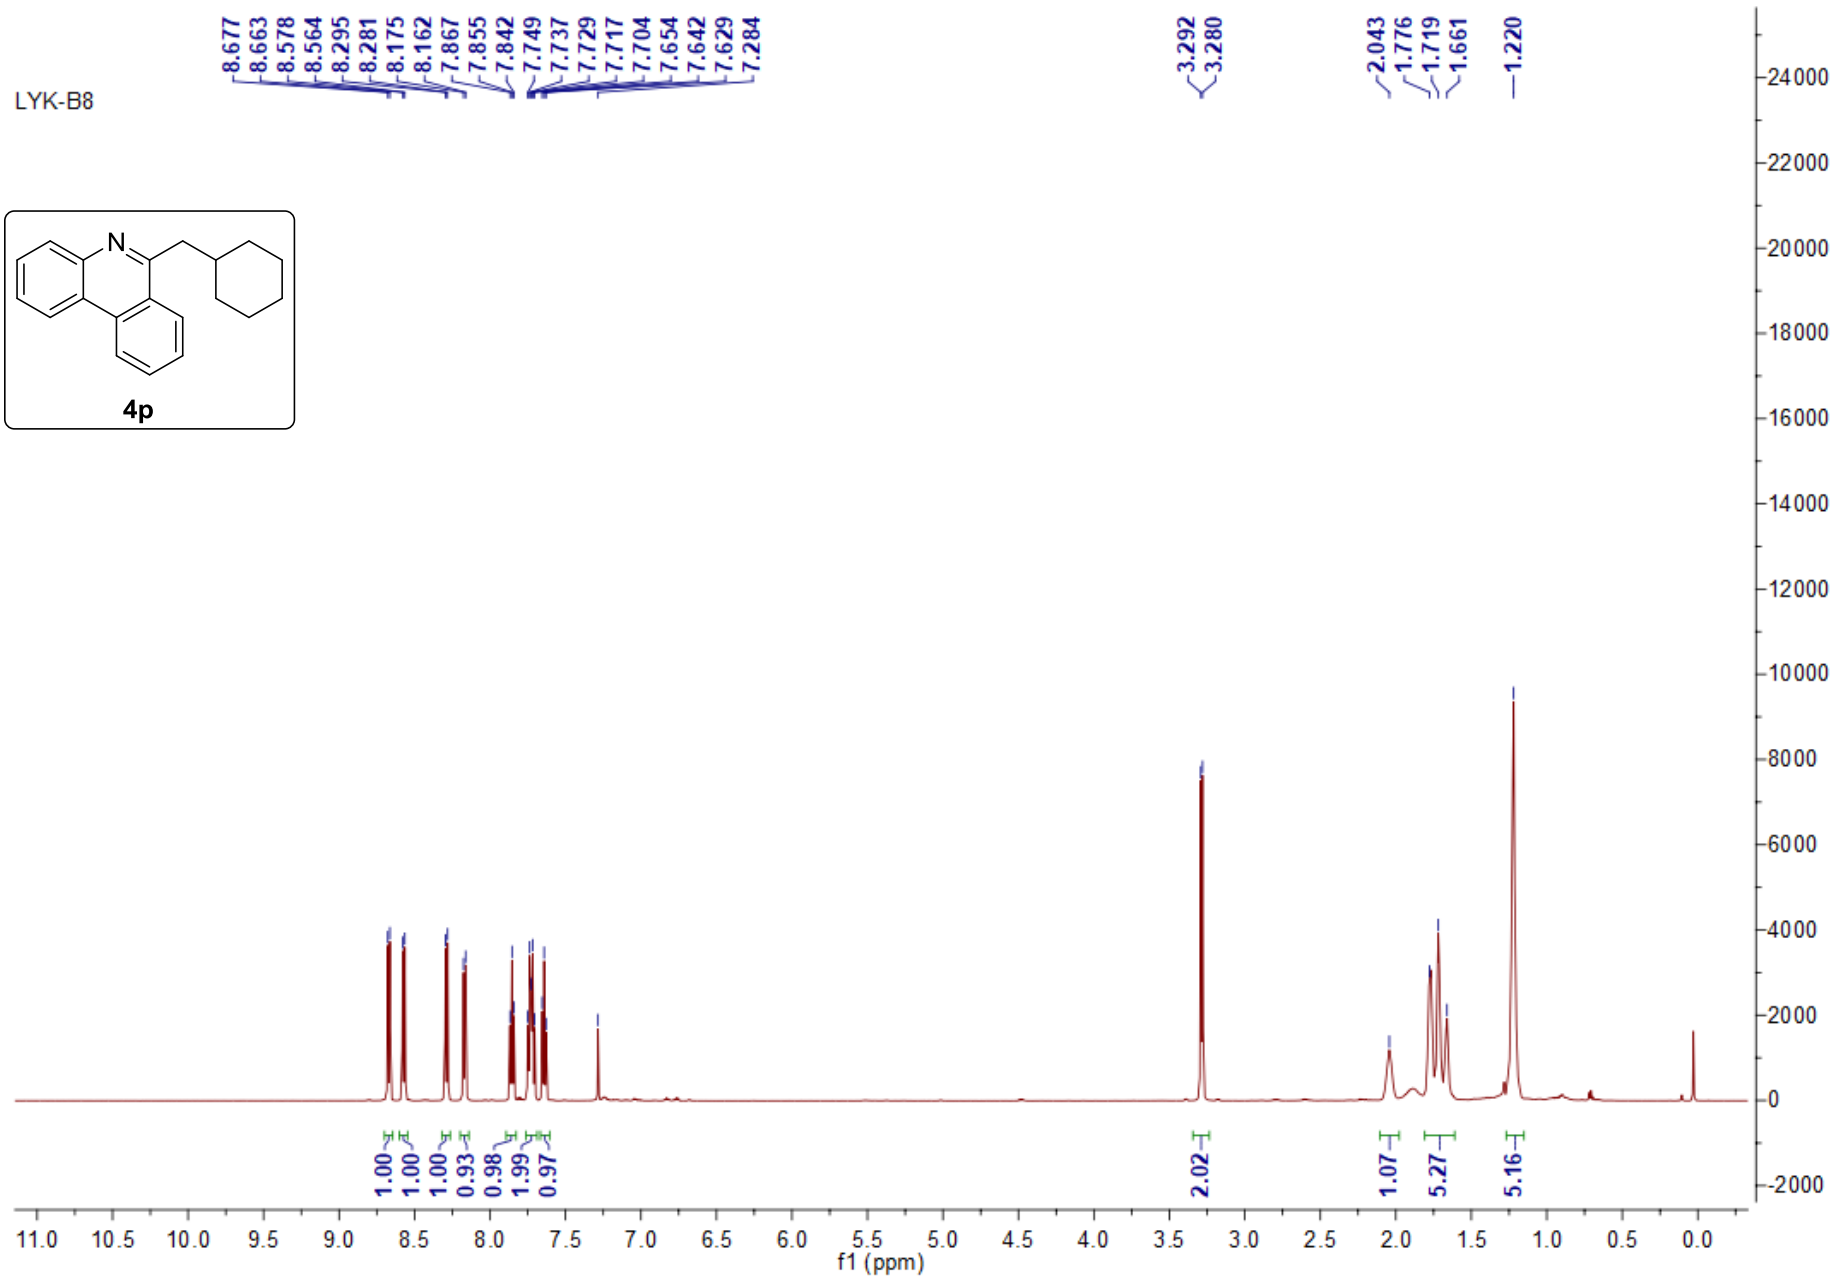

LYK-B8

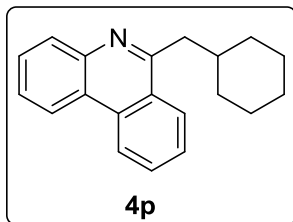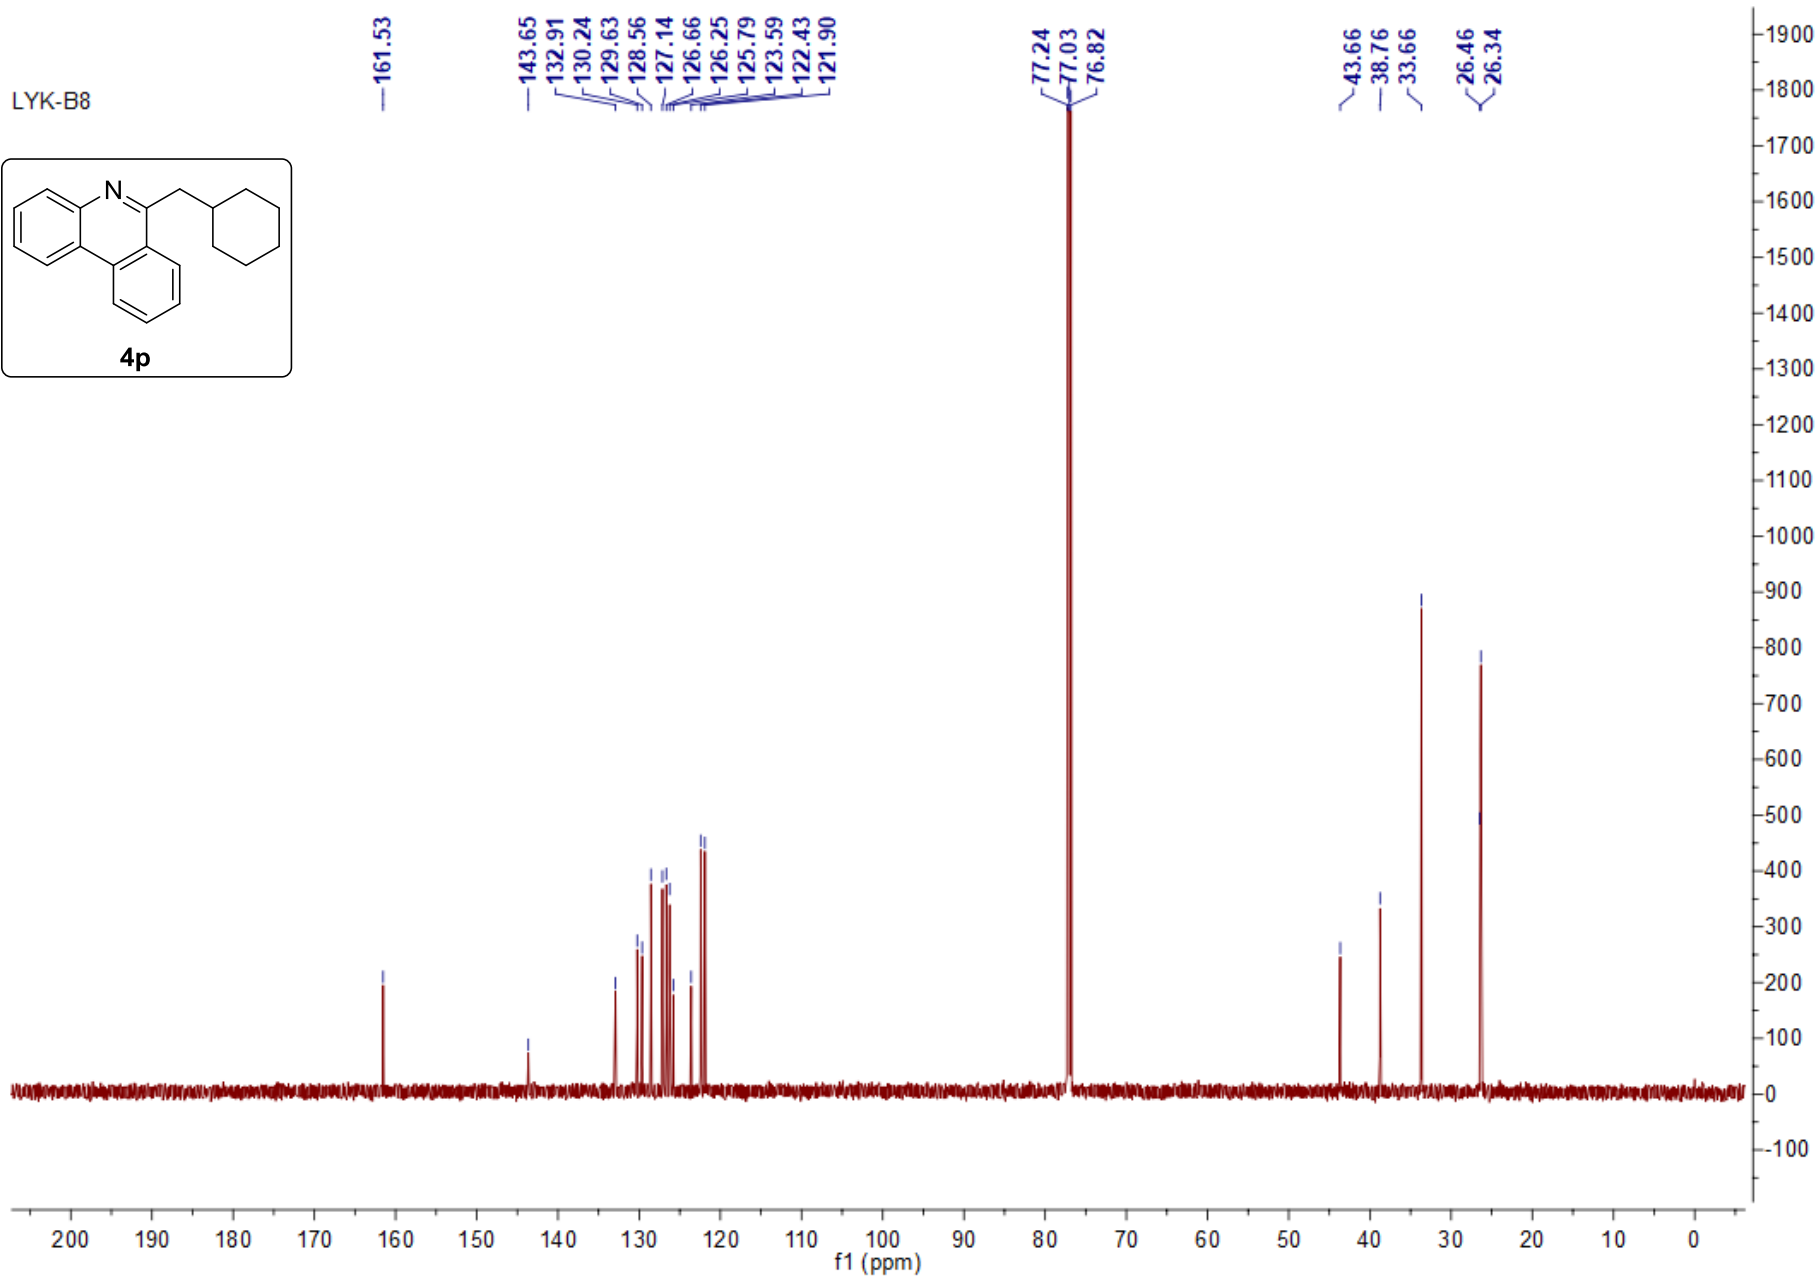



200909  
zlm-PD-2 CDC13 0909

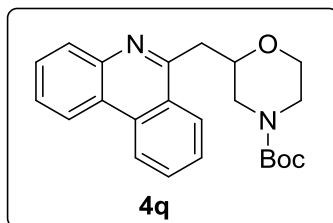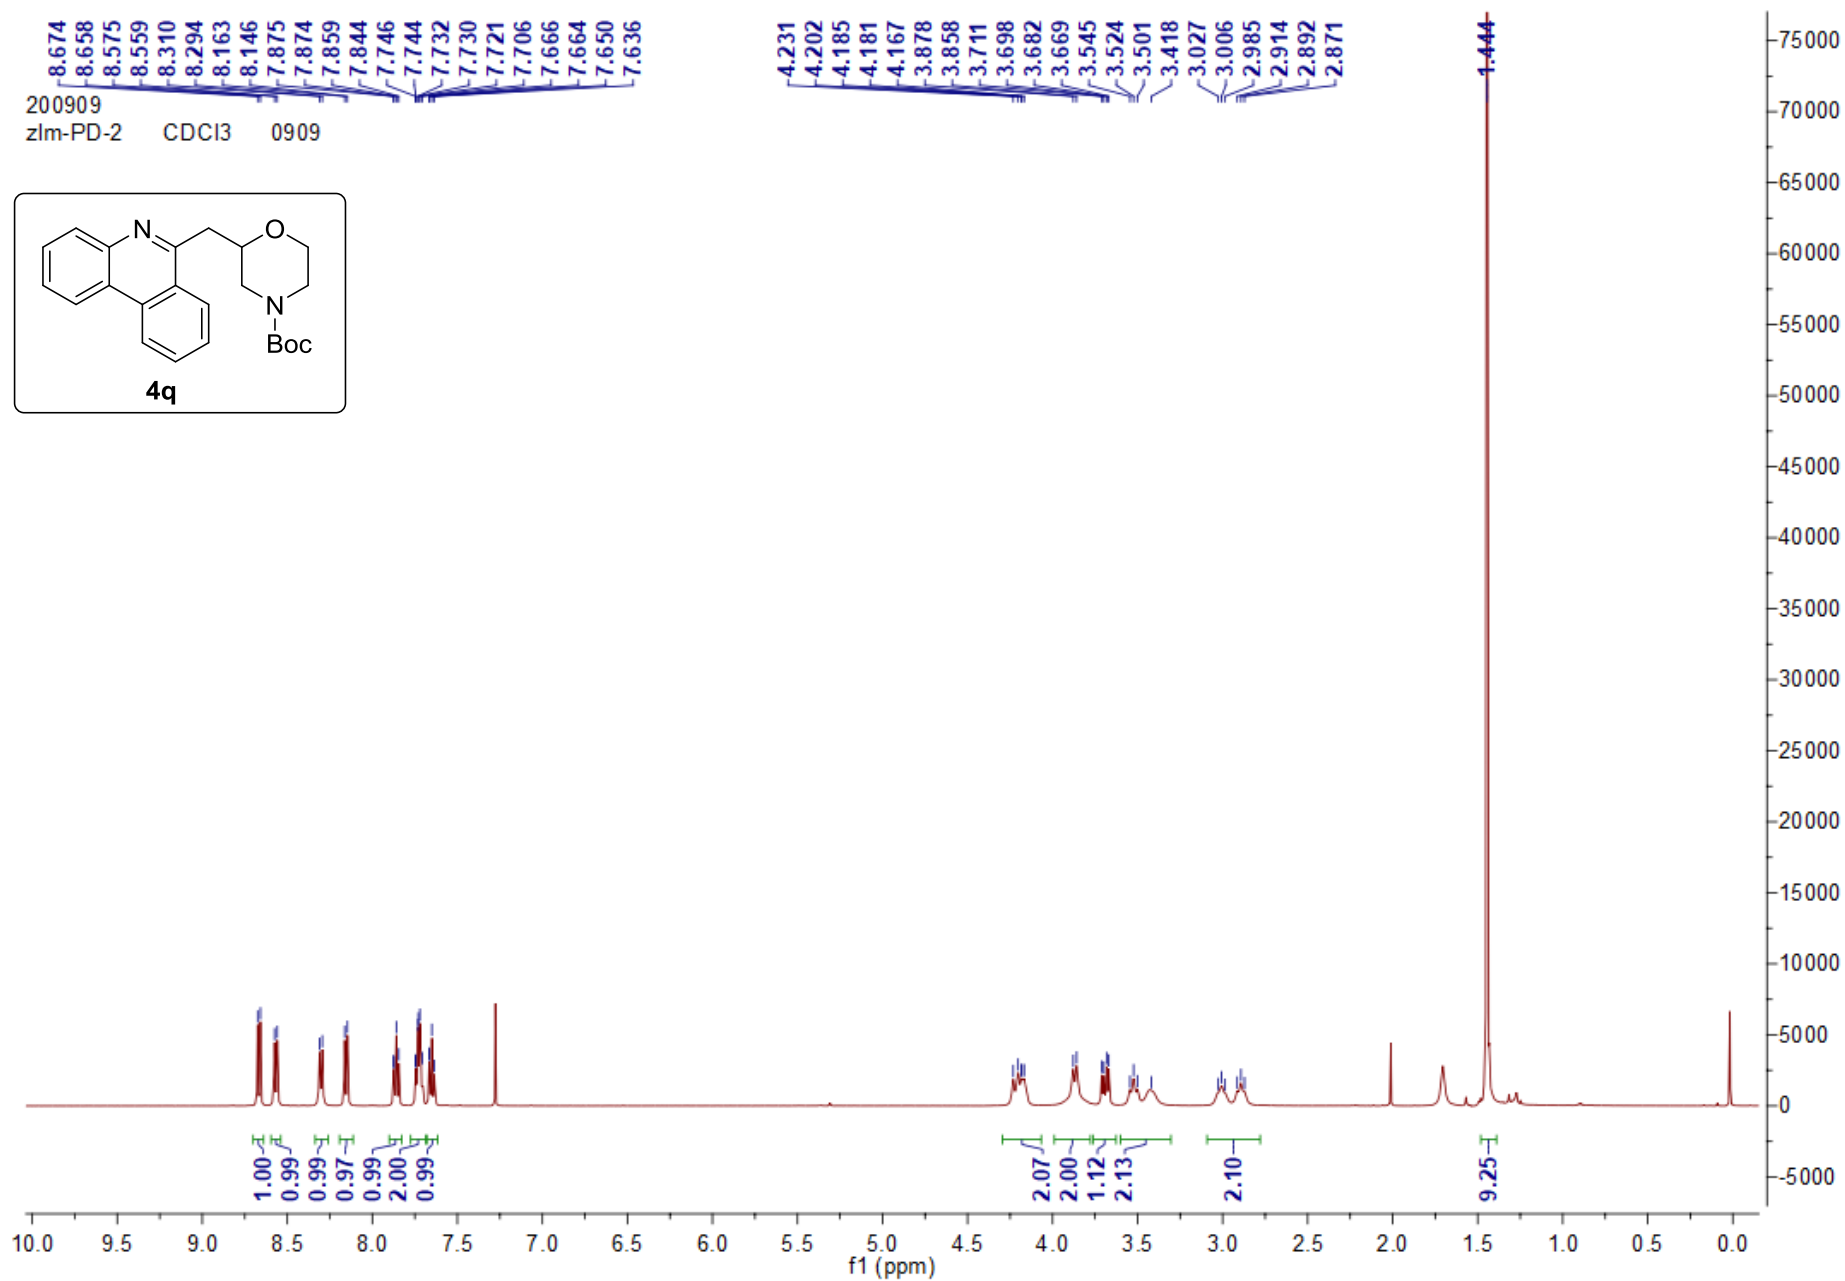

ML  
zlm-PD-2 CDCl3 0129

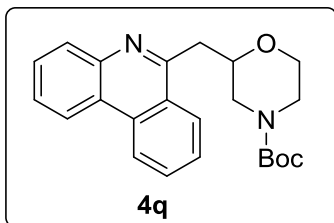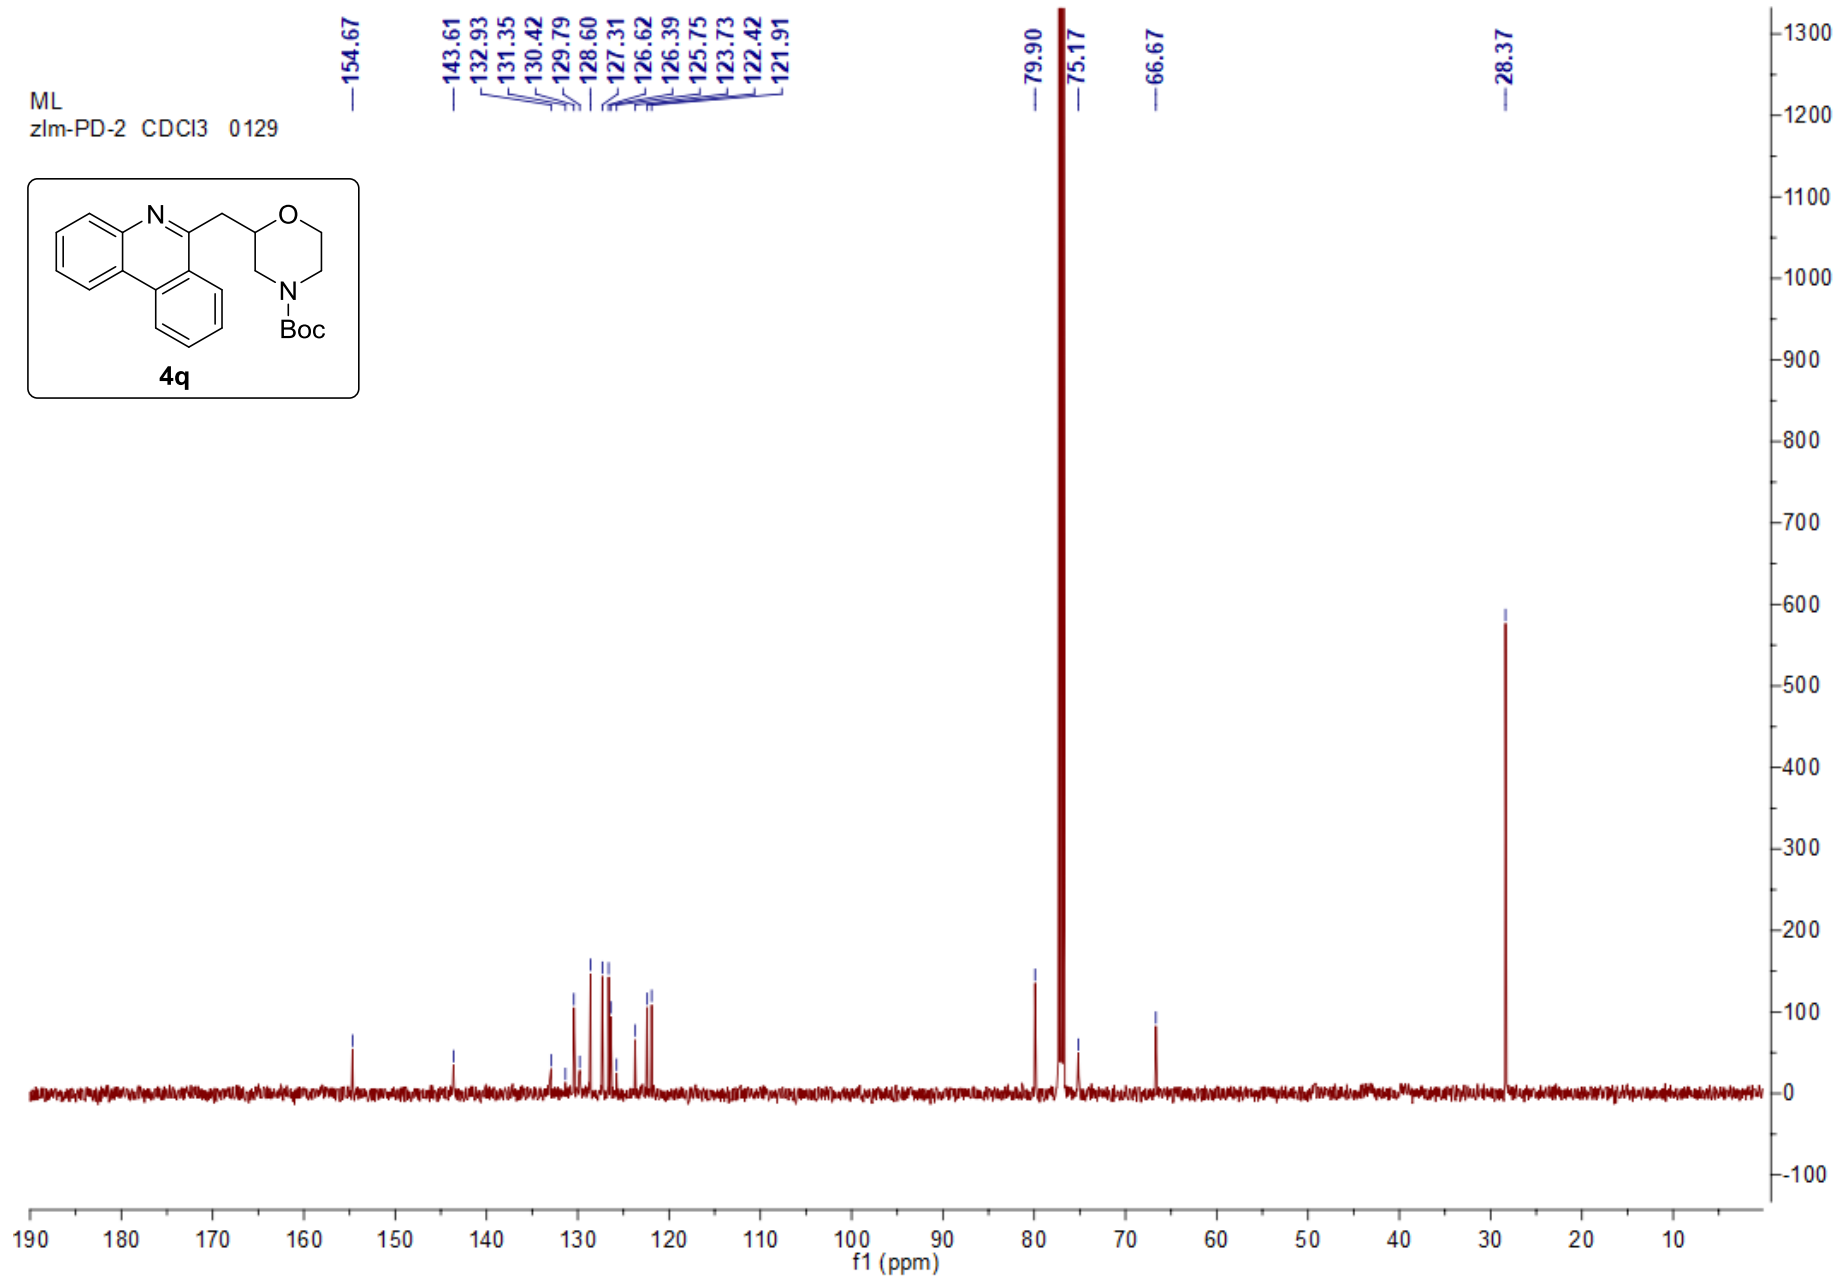

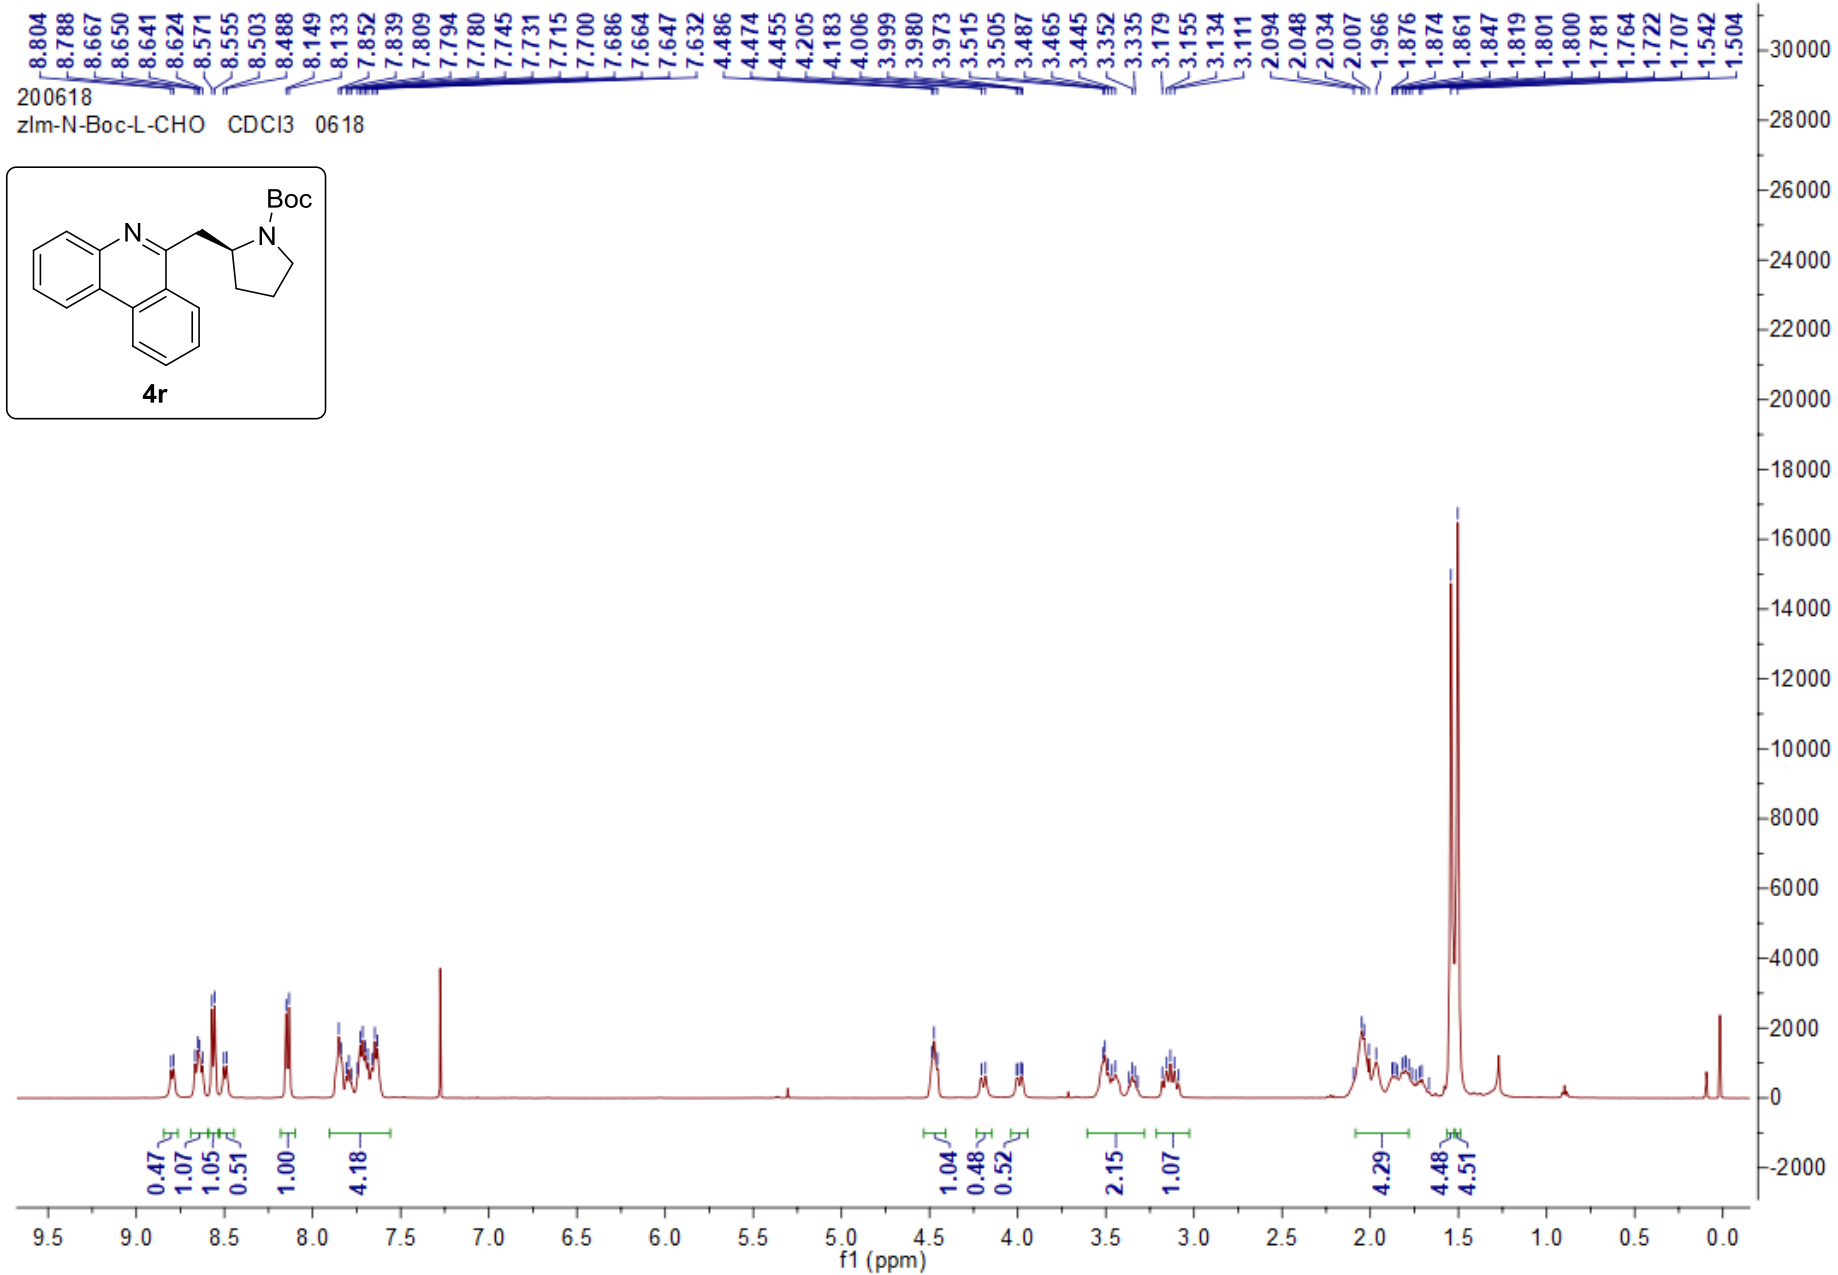

200618  
zlm-N-Boc-L-CHO CDCl<sub>3</sub> 0618

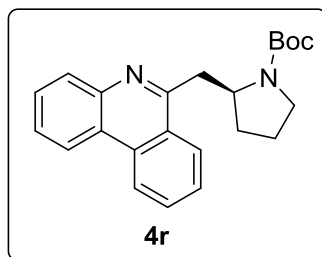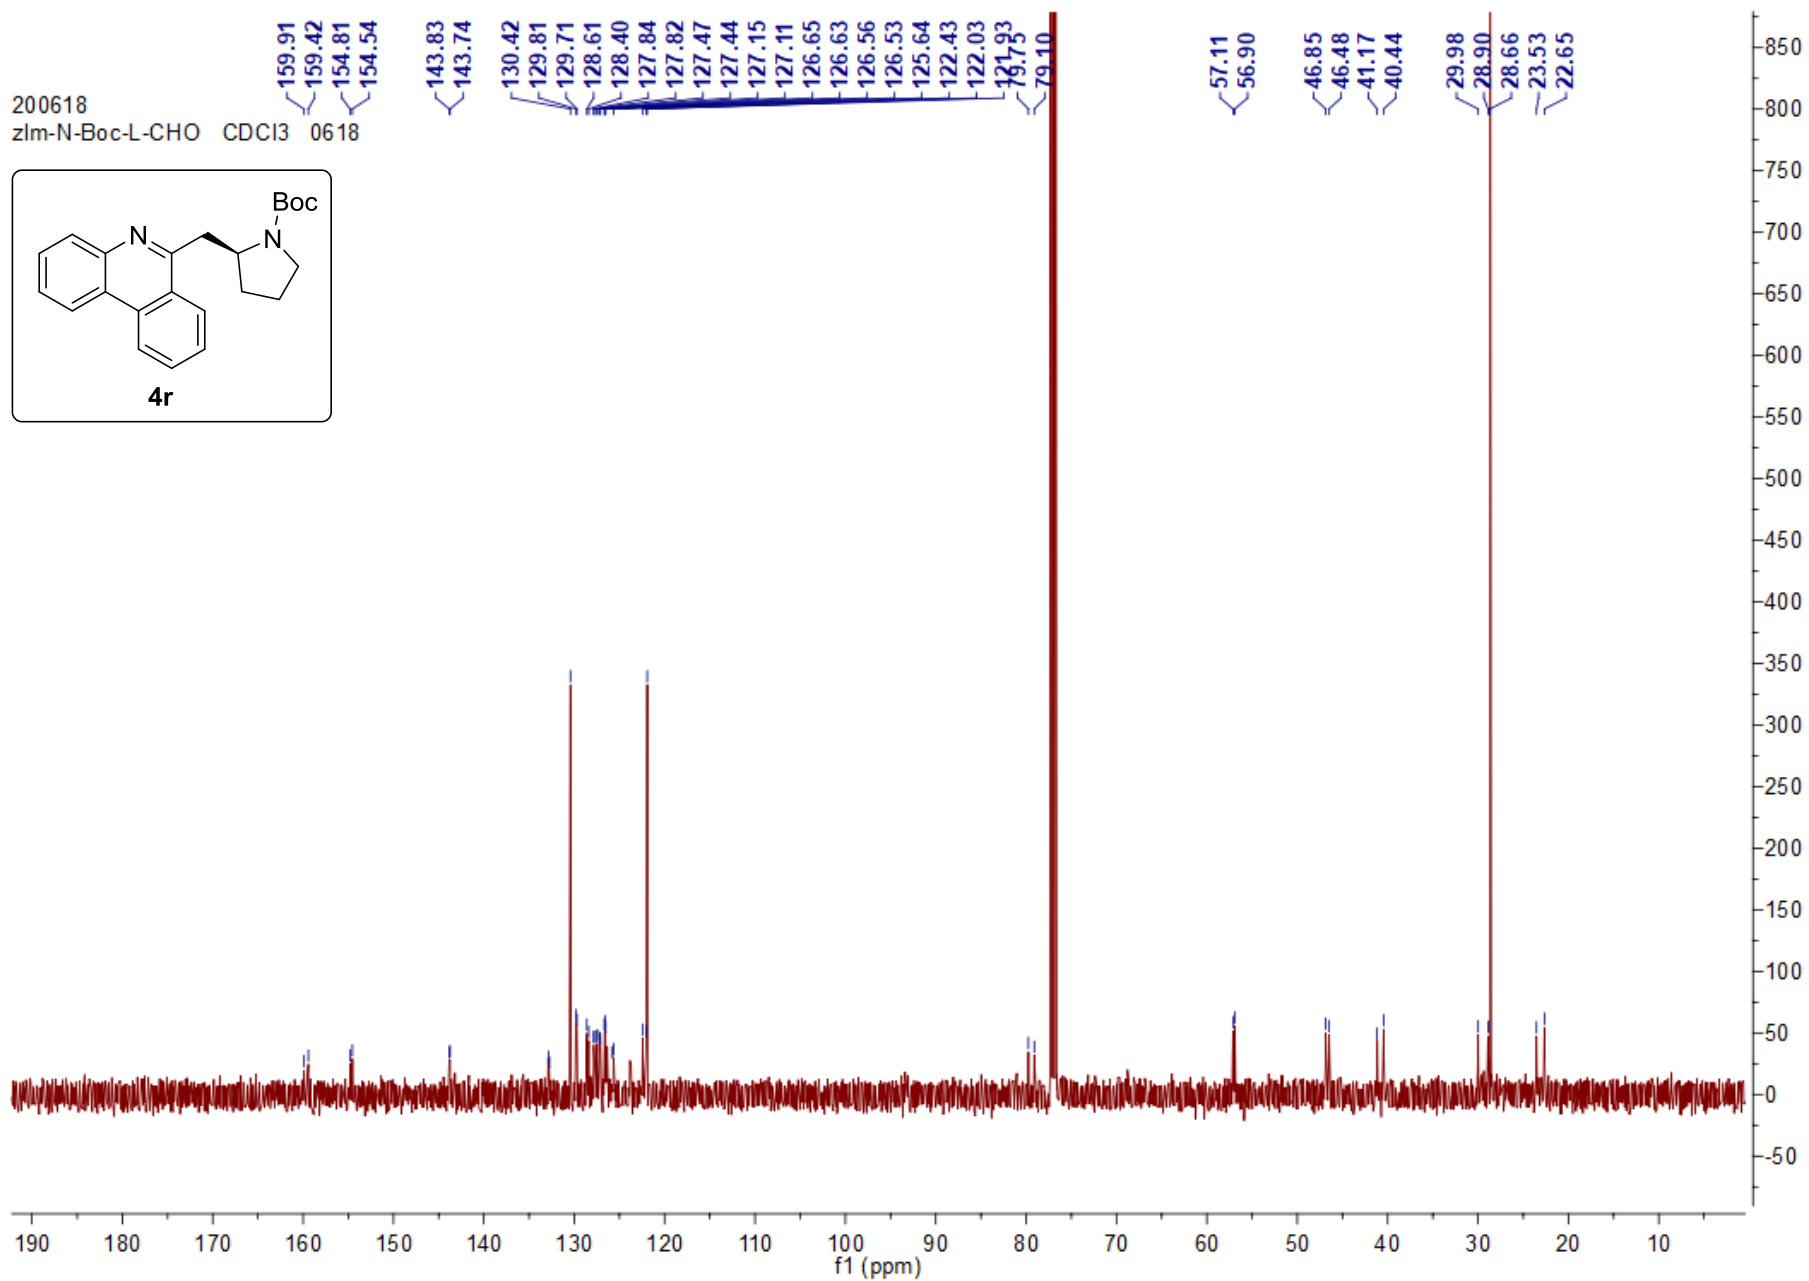

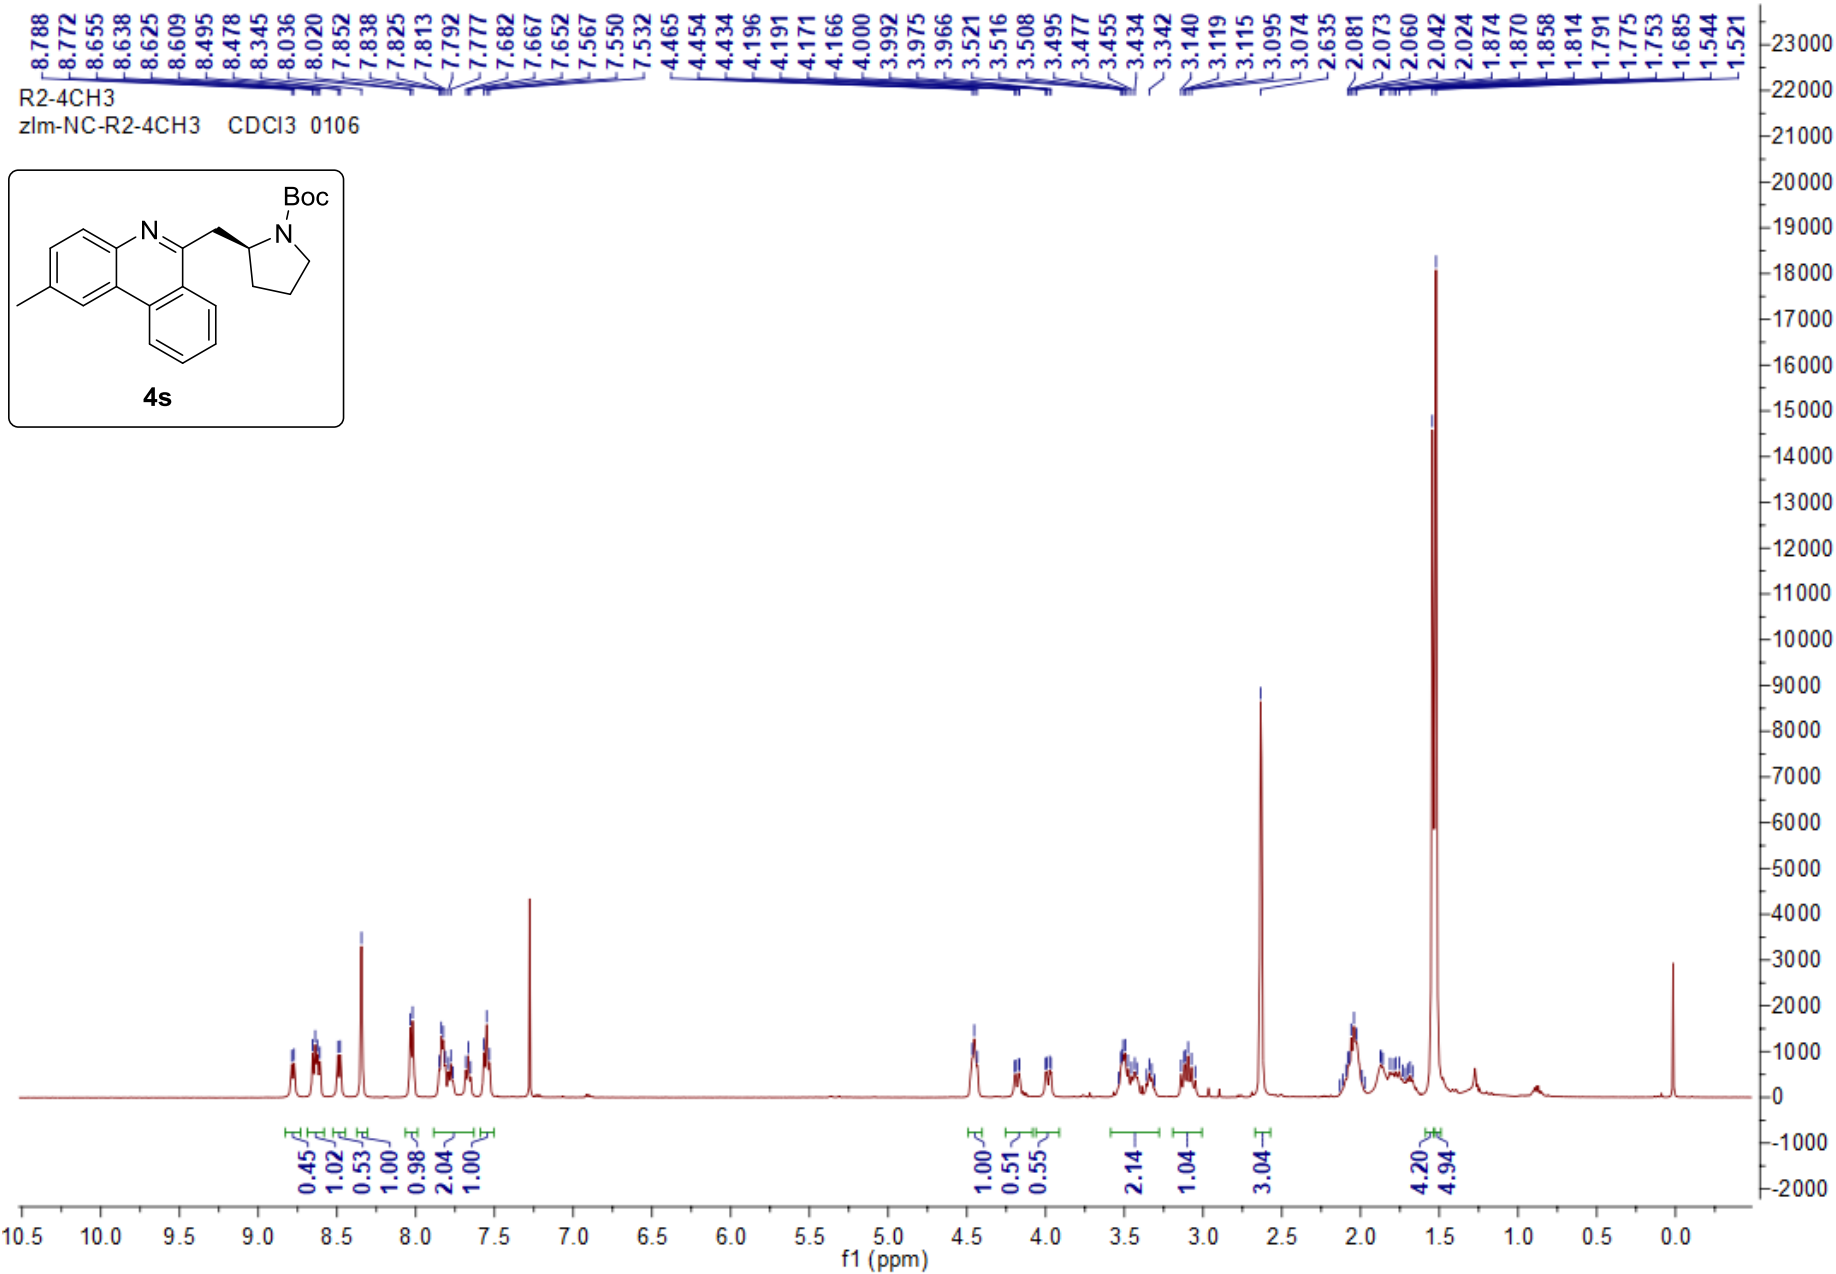

R2-4CH3  
zlm-NC-R2-4CH3 CDCl3 0119

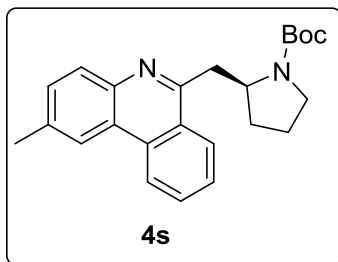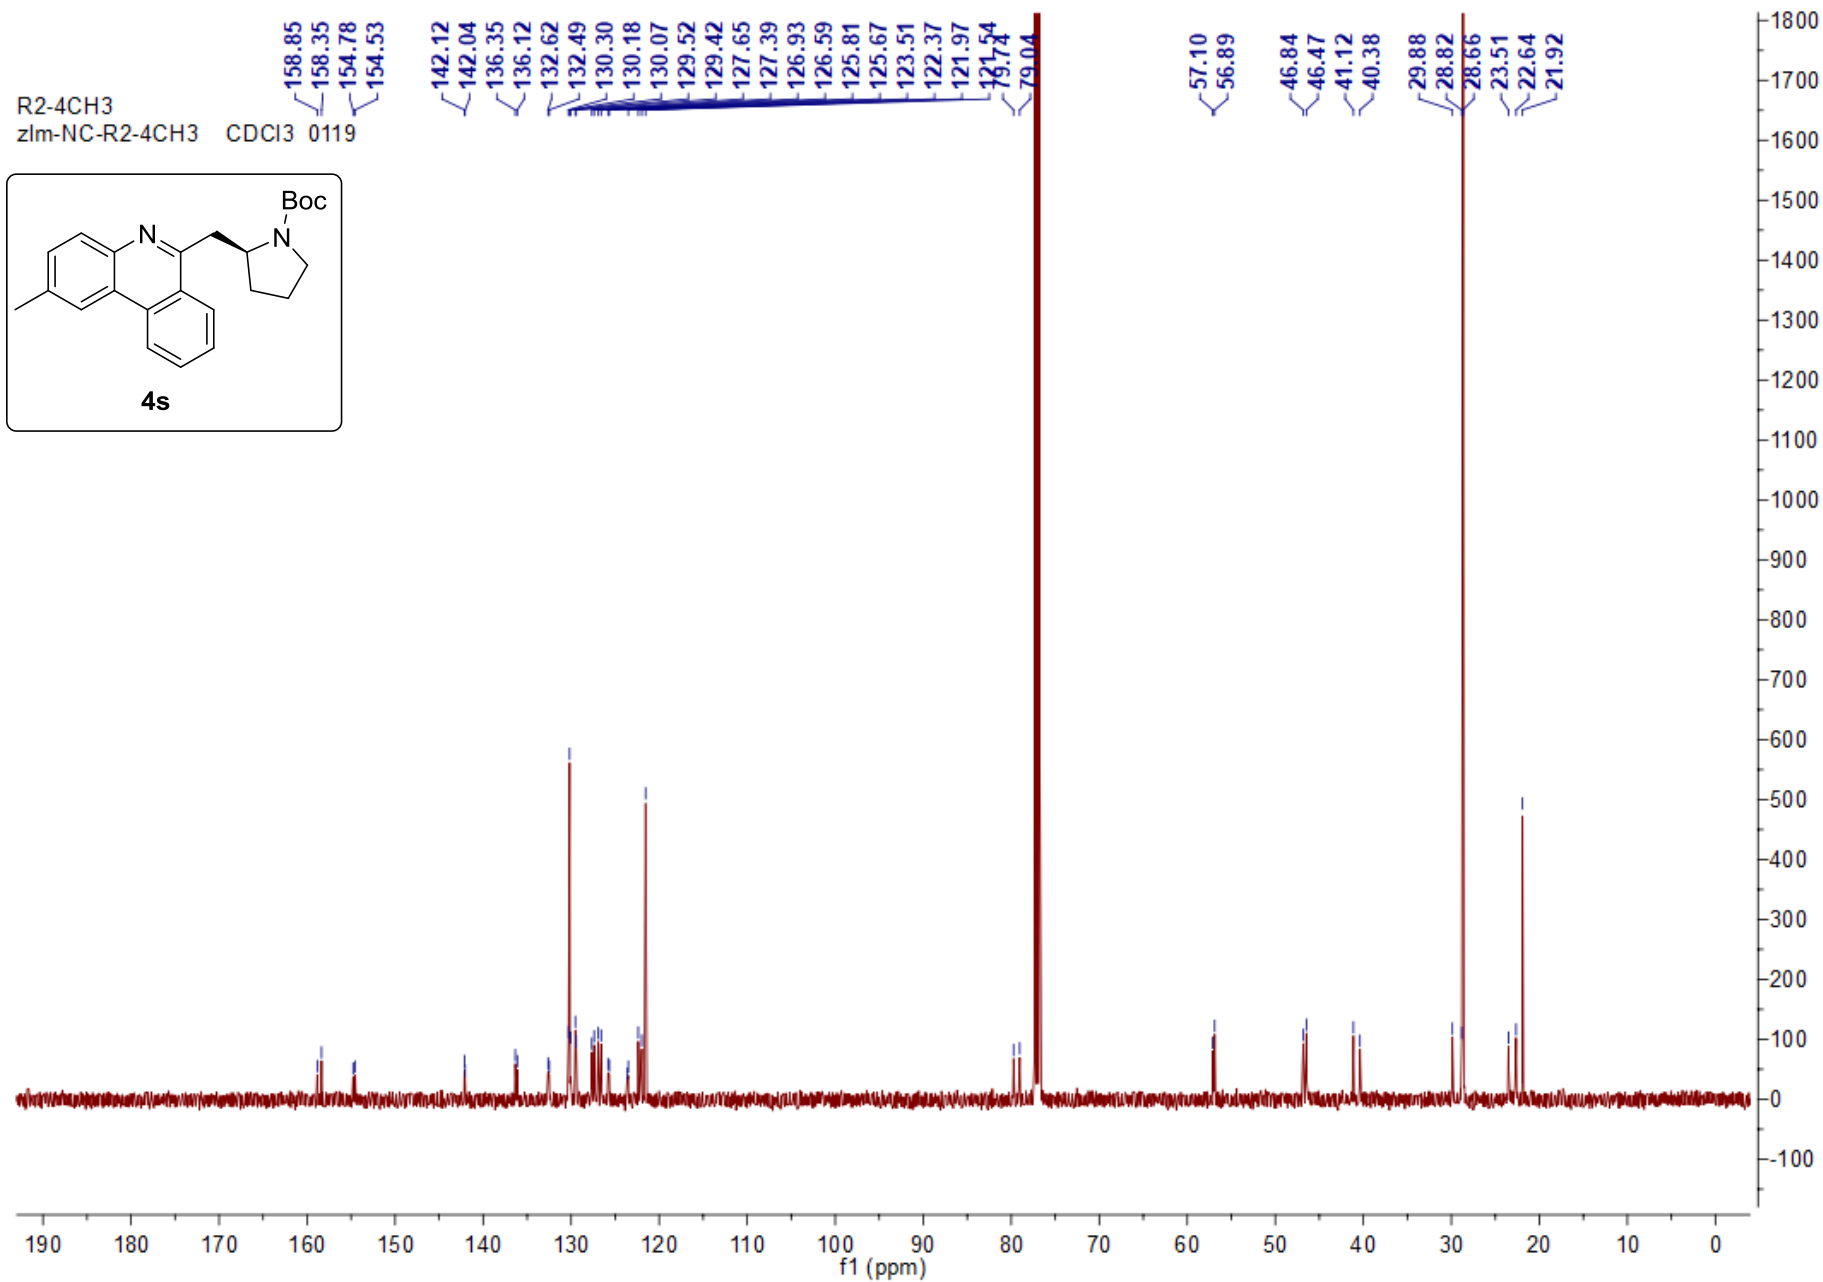

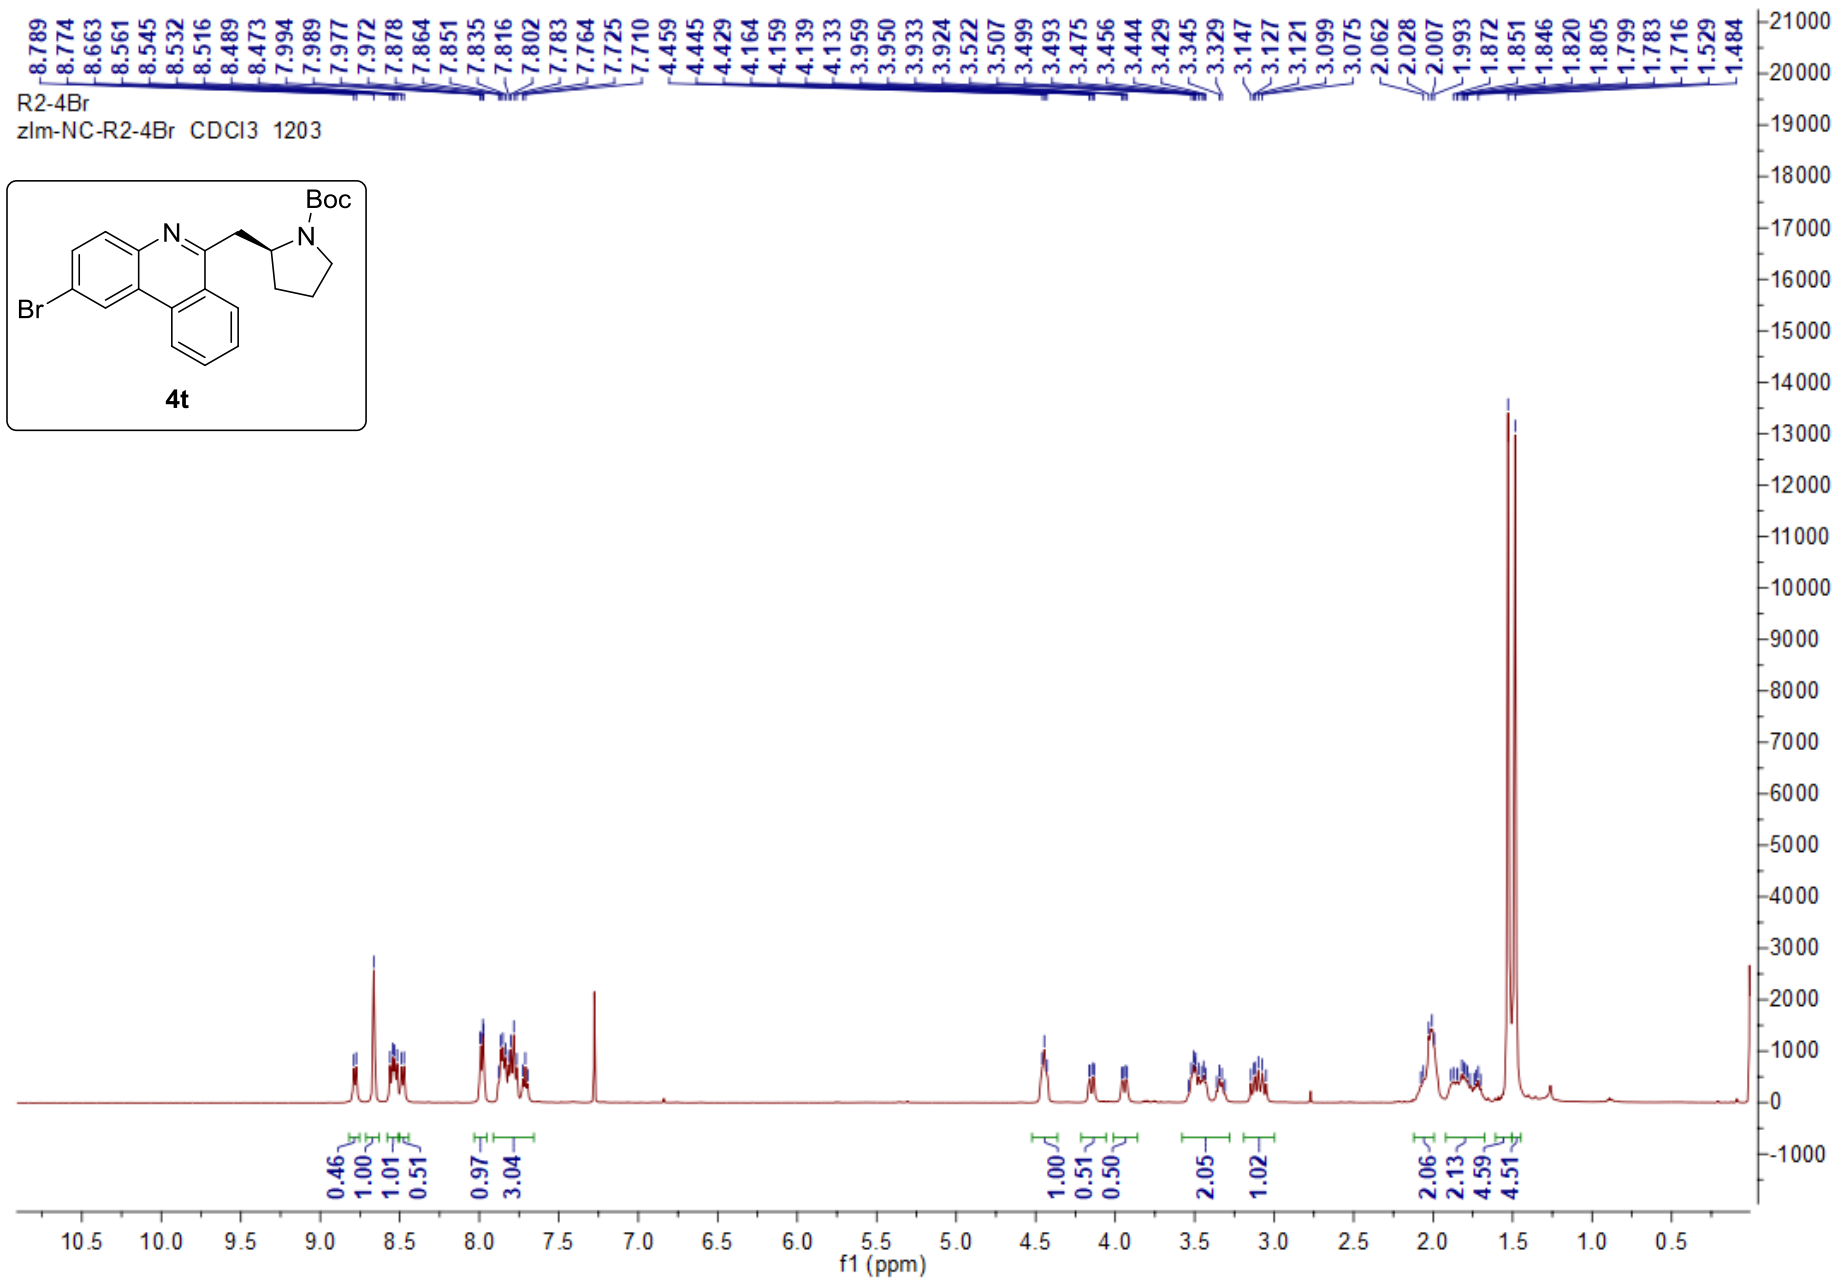

R2-4Br  
zlm-NC-R2-4Br CDCl3 0130

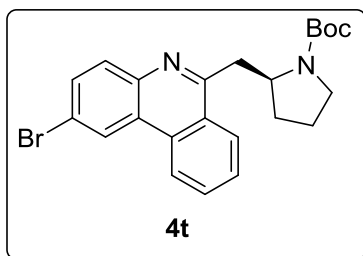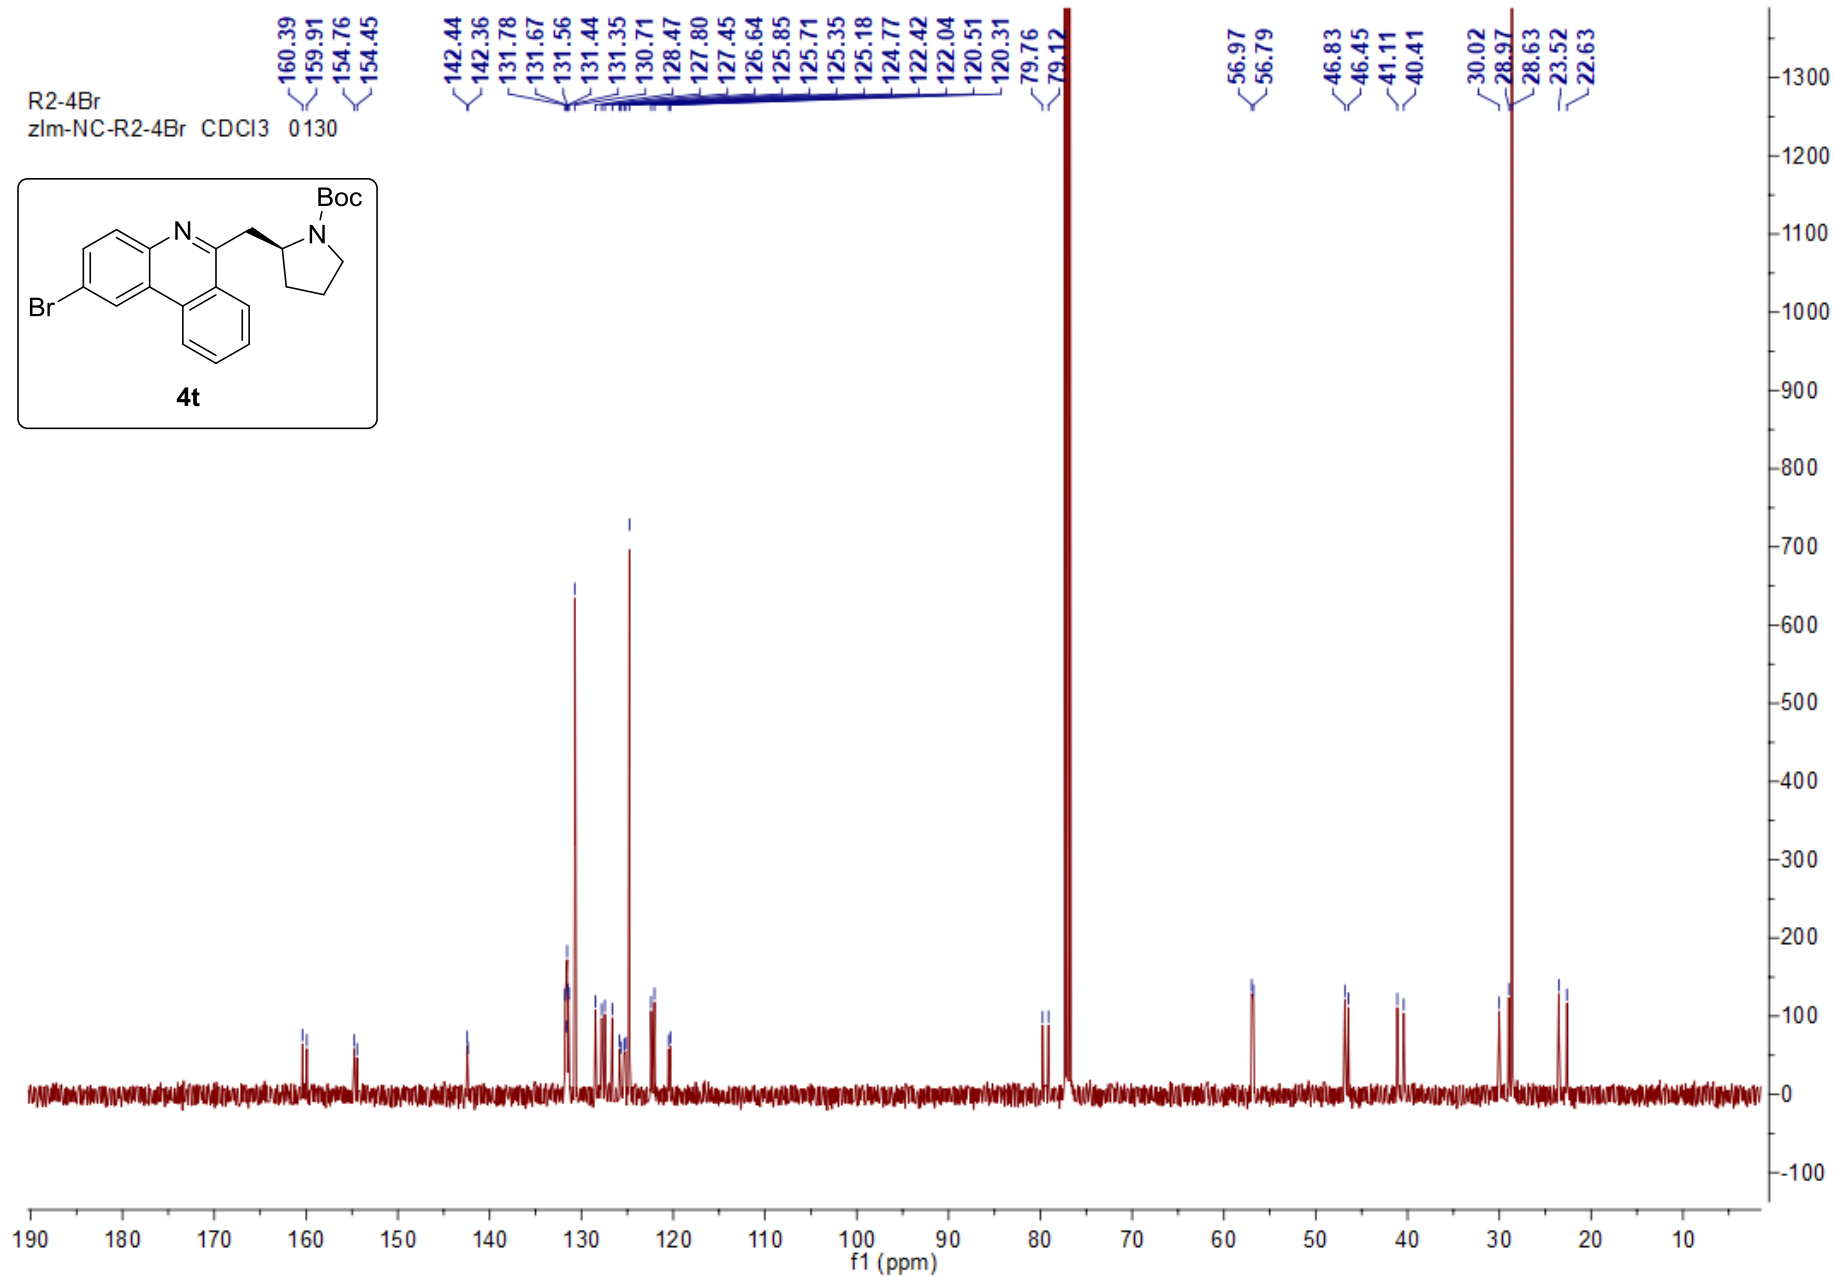



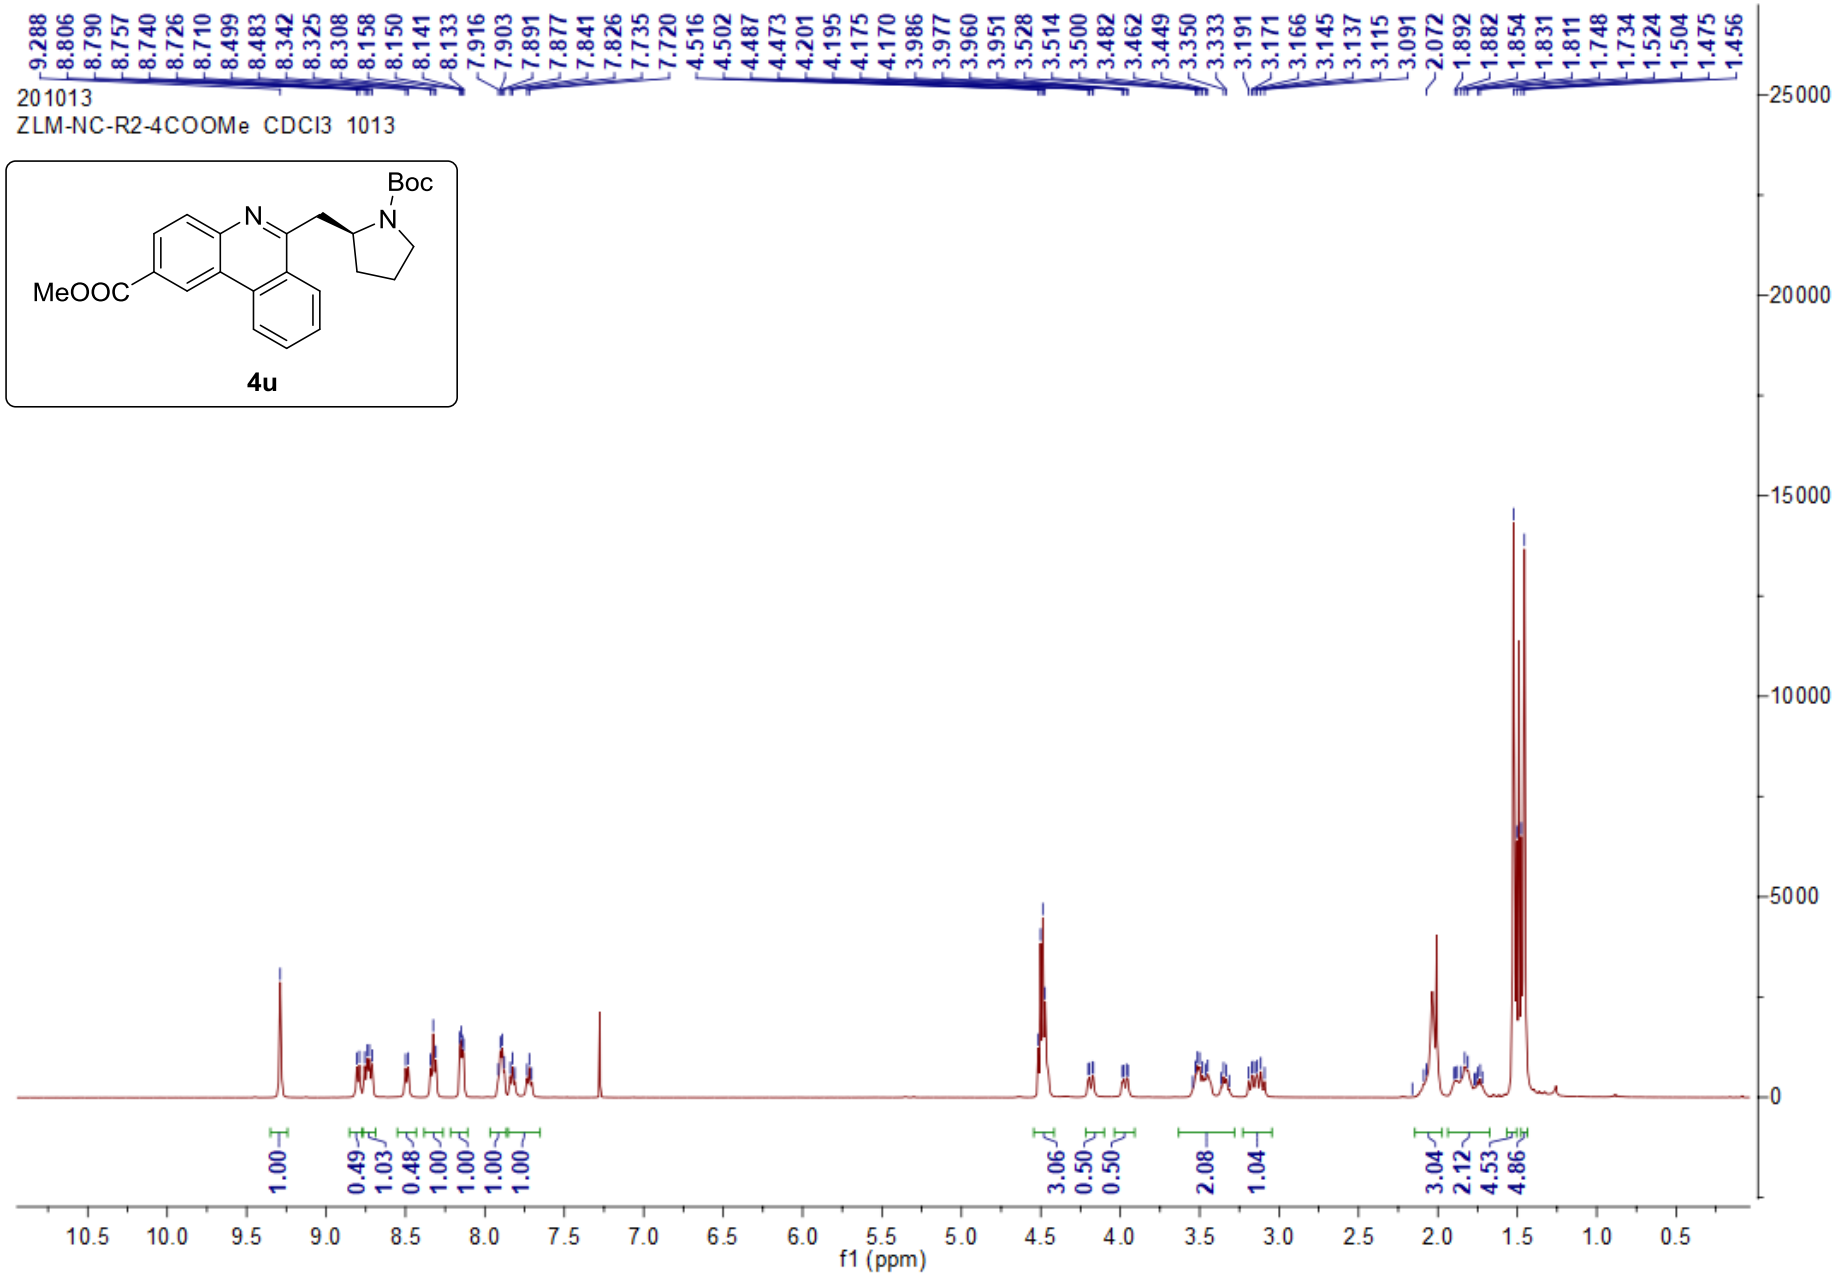

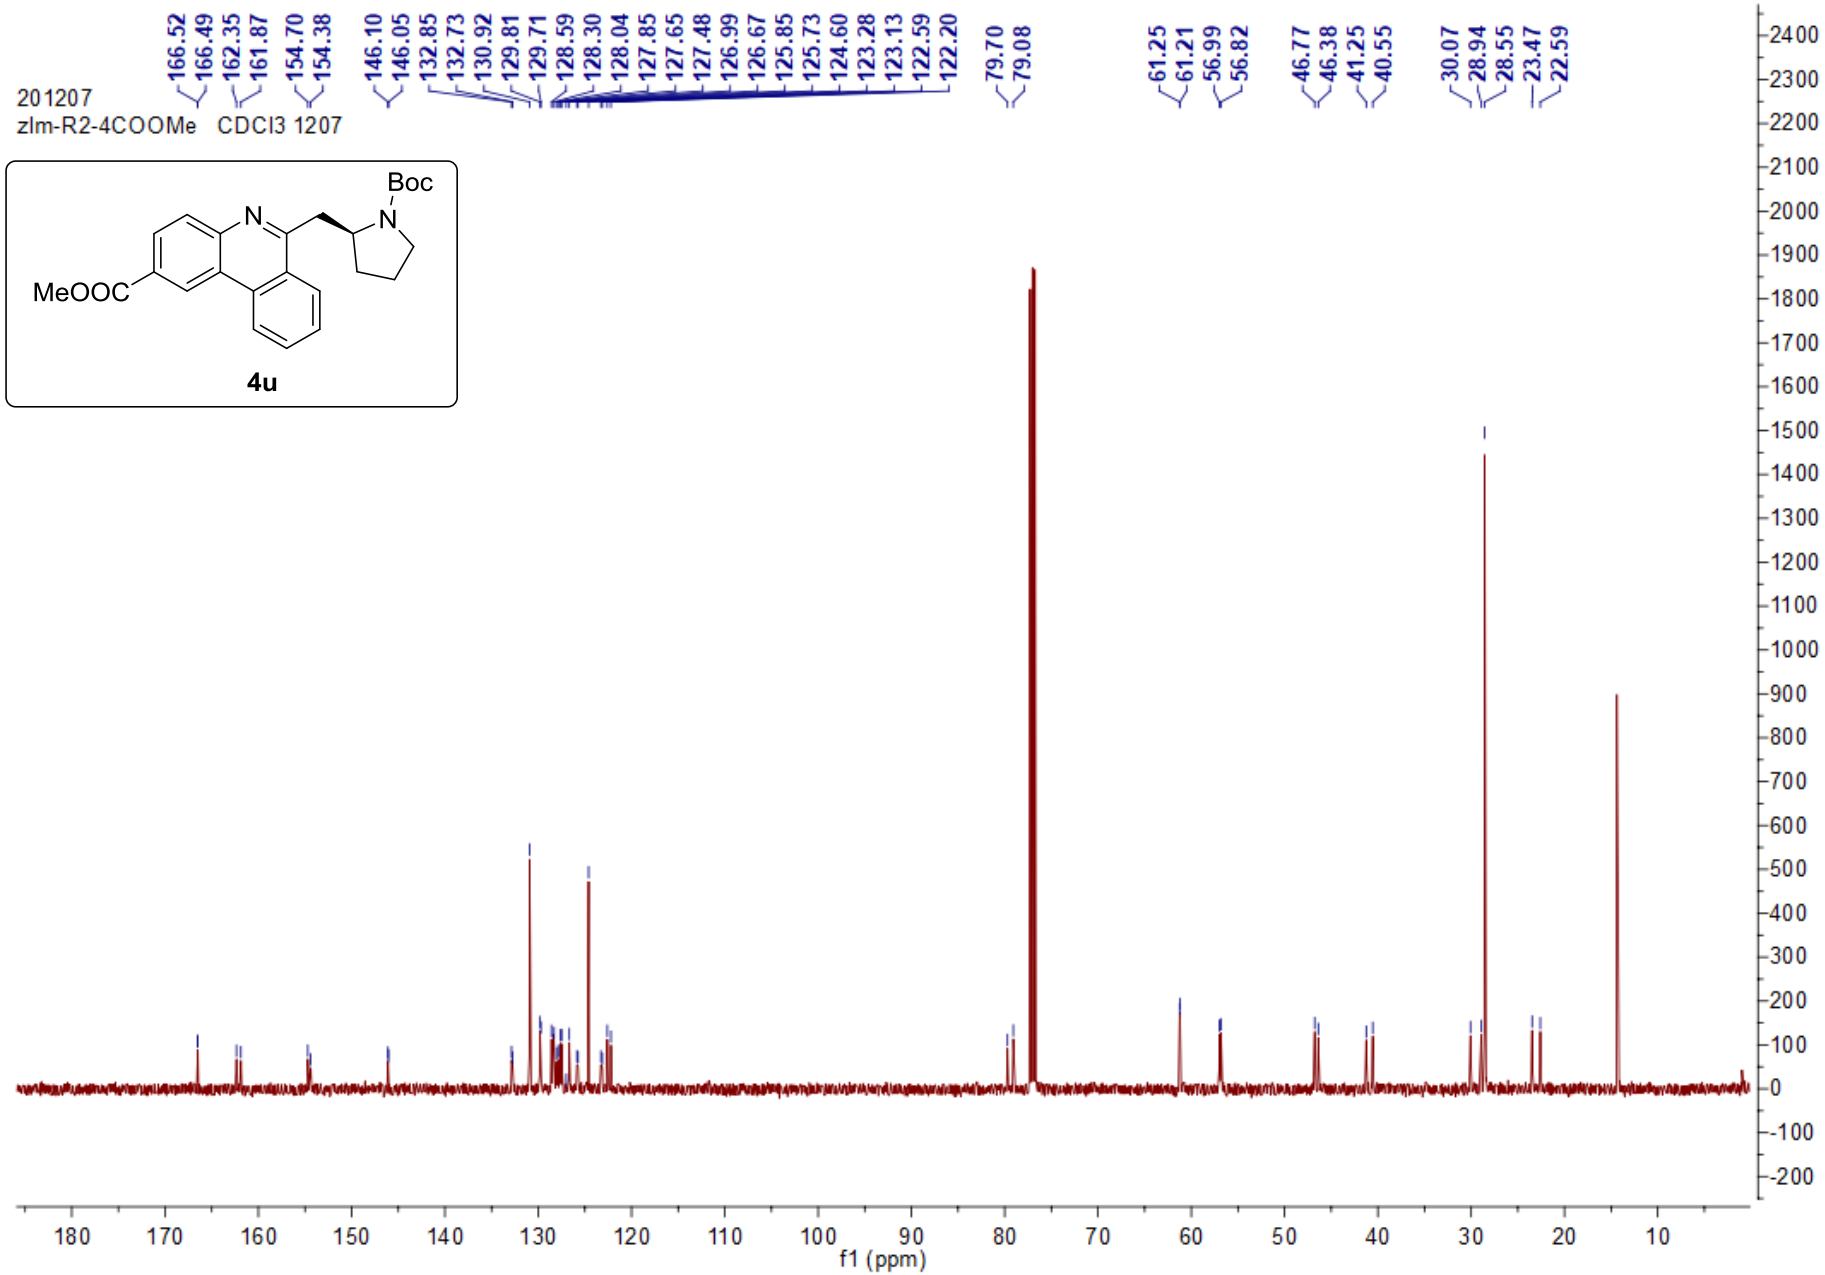

201013  
ZLM-NC-R2-4CN CDCI3 1013

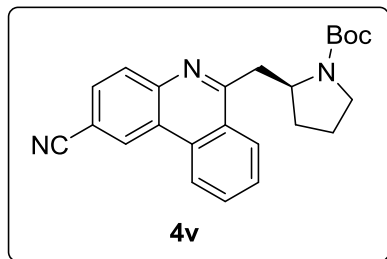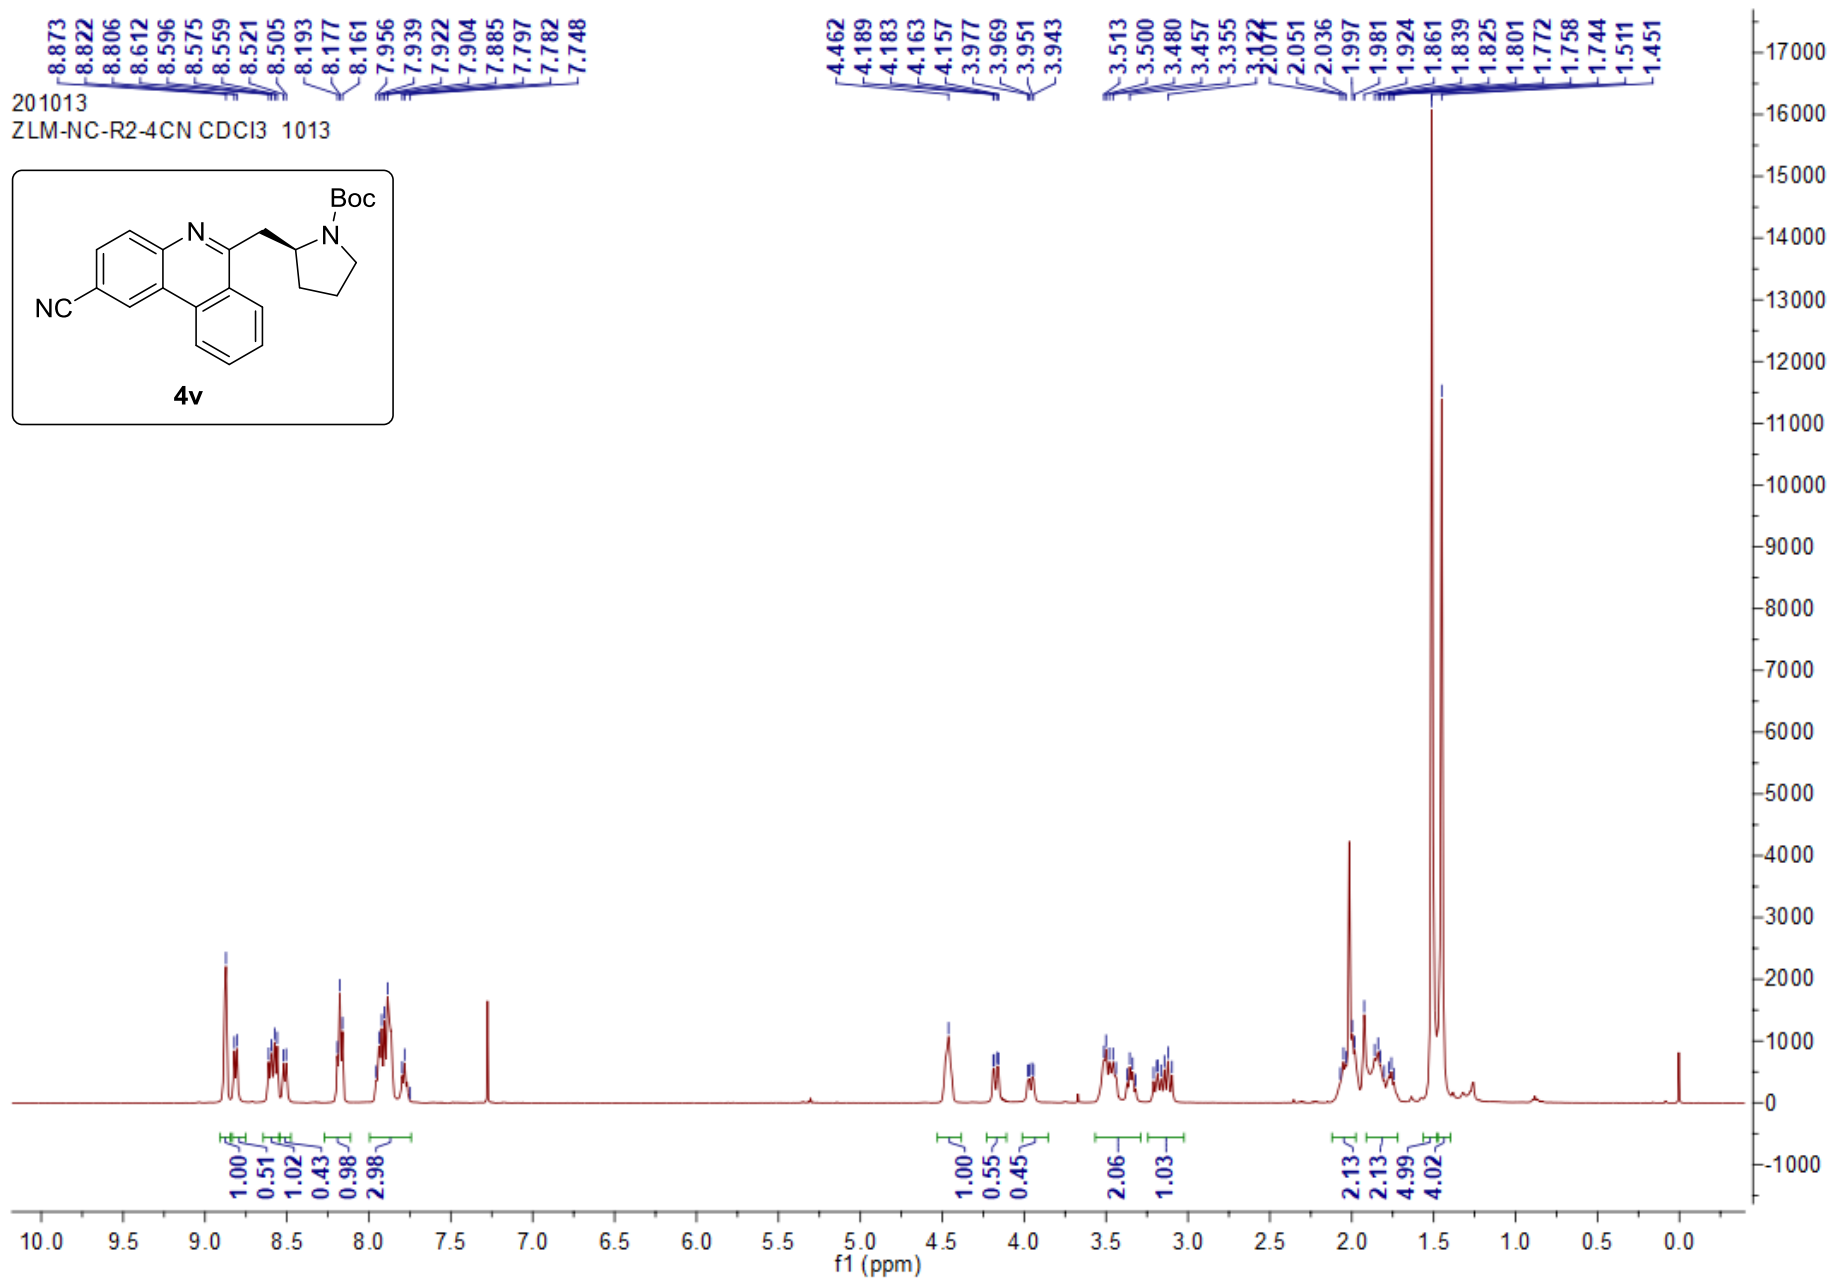

R2-4CN  
zlm-NC-R2-4CN CDCl3 1203

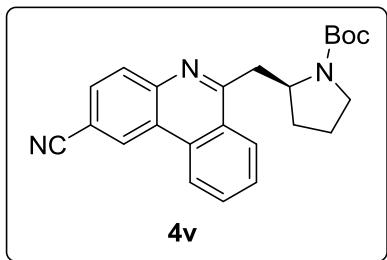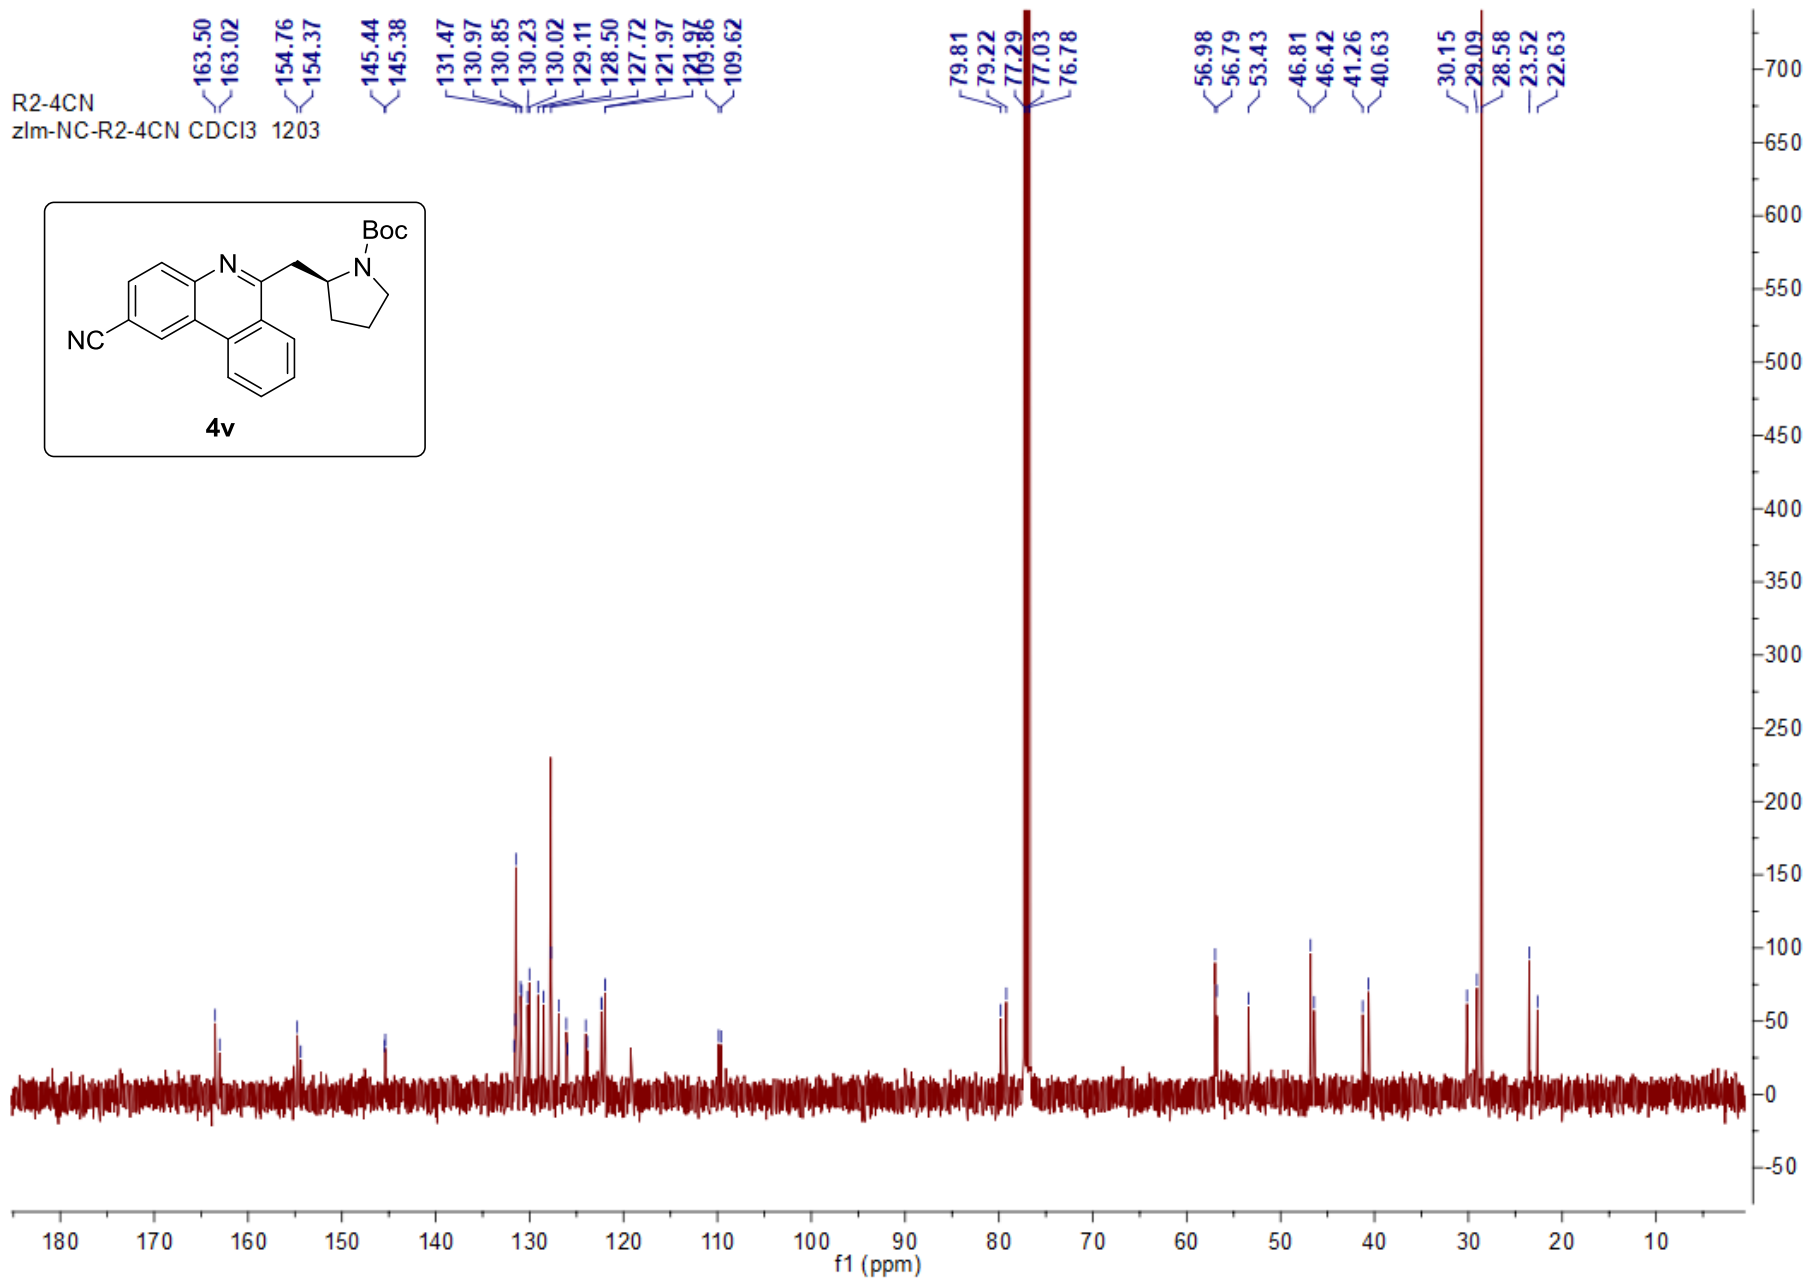

200708  
zlm-NC-R2-5CF3 CDCl3 0708

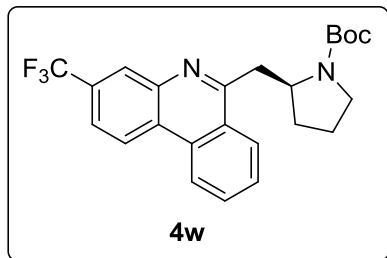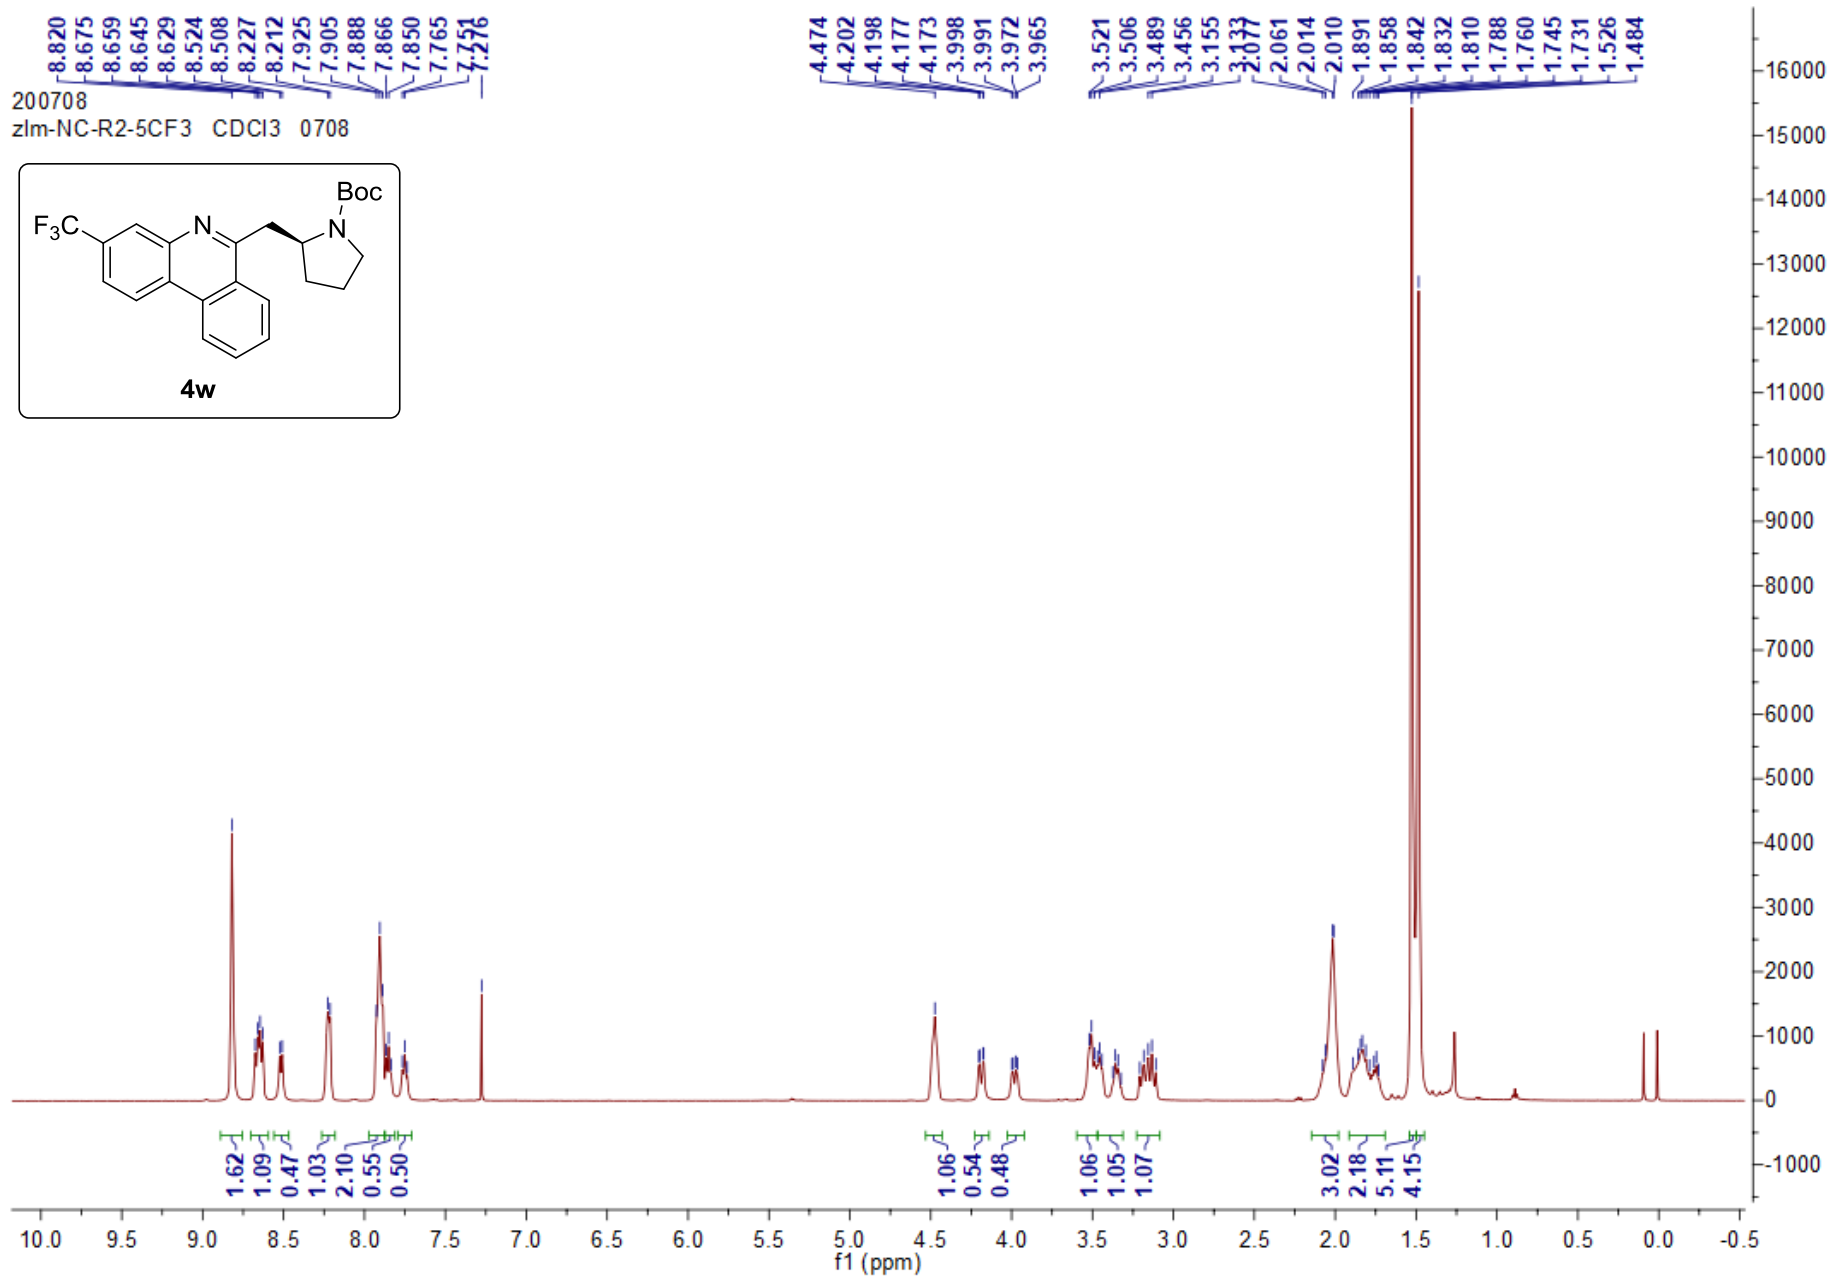

200721  
zlm-NC-R2-5CF3 CDCI3 0721

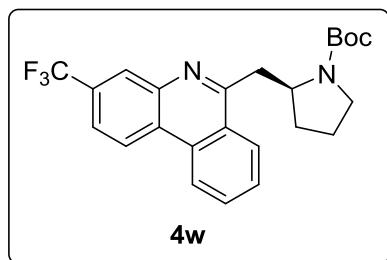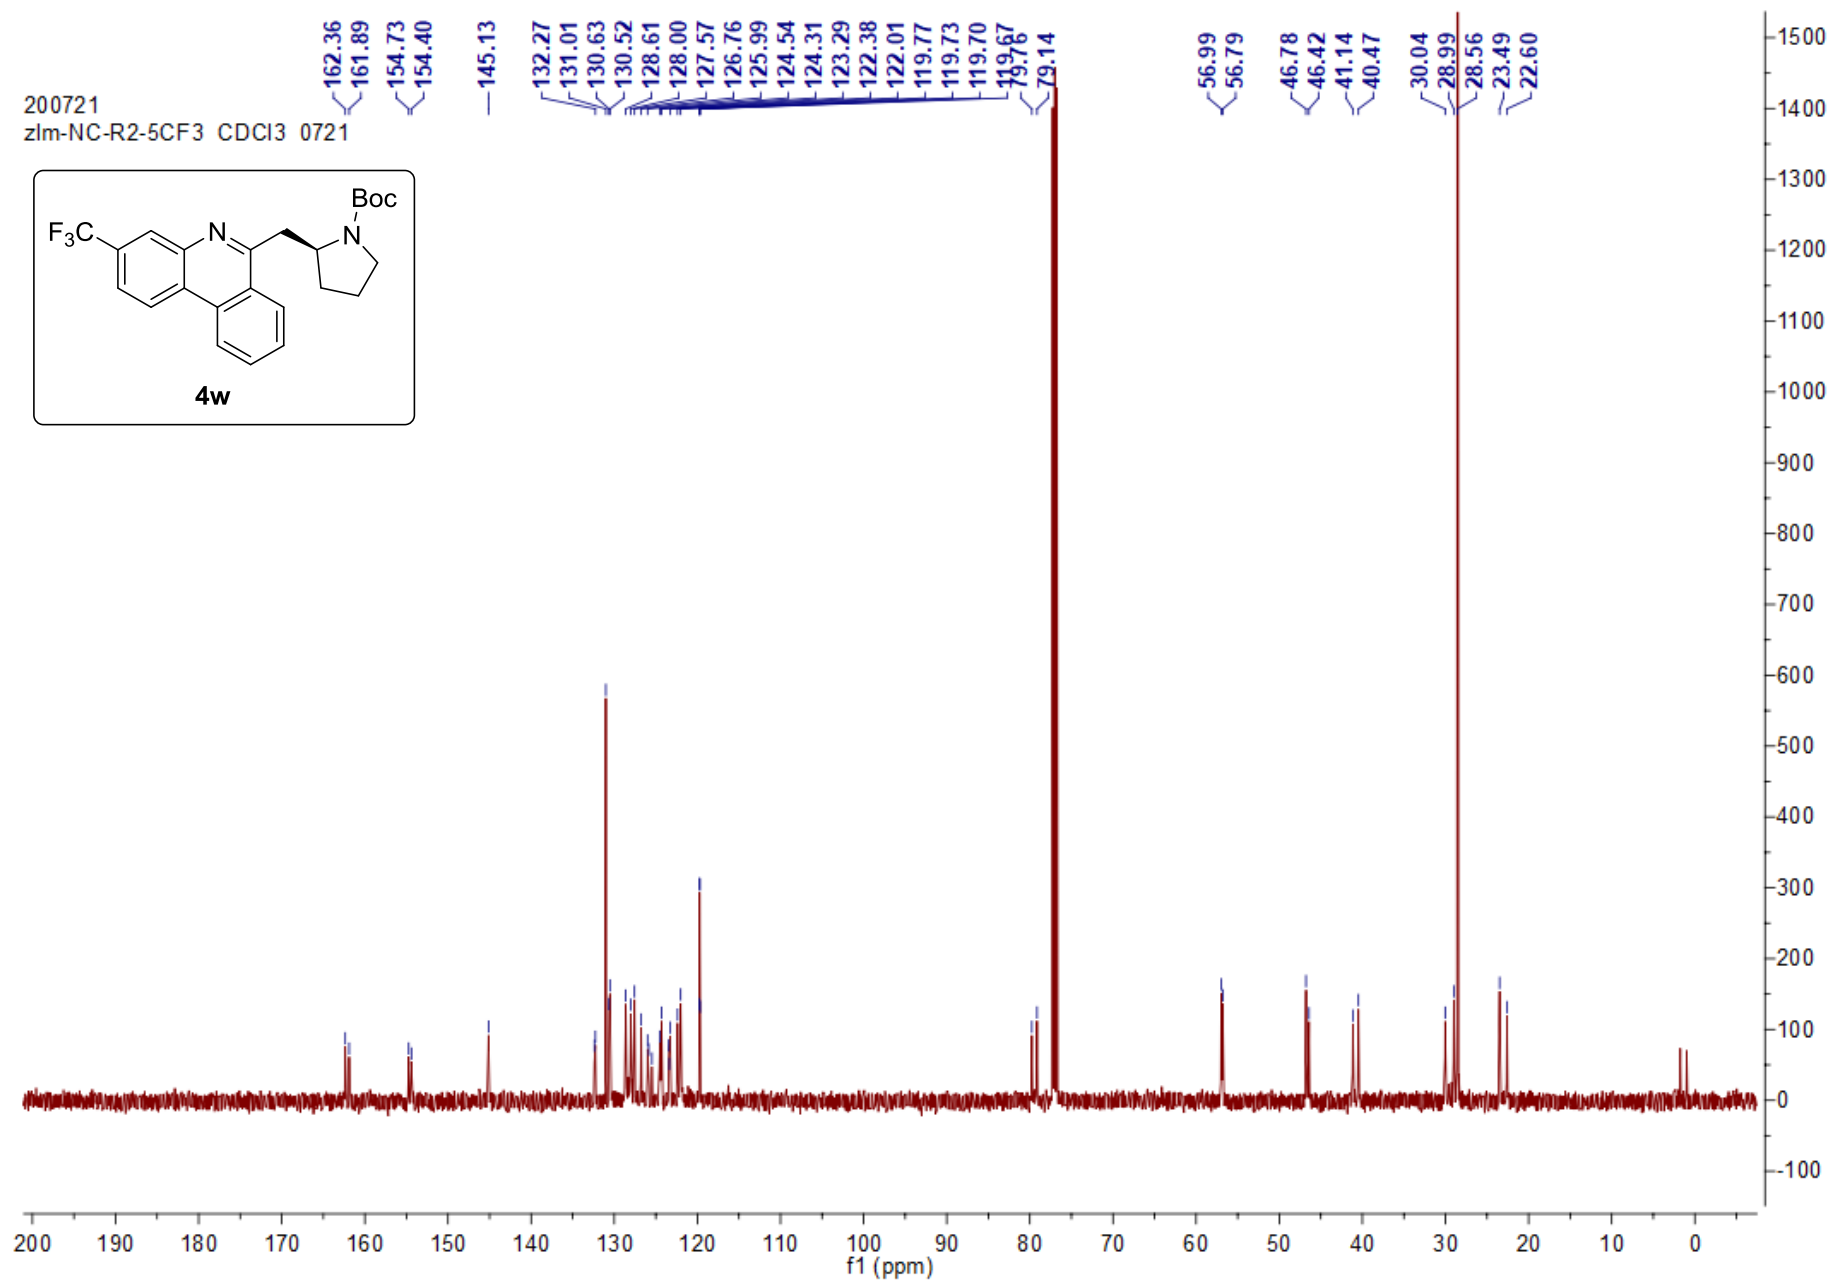

R1-4OCH3  
zlm-NC-R1-4OMe CDCl3 0129

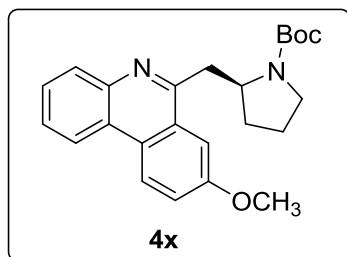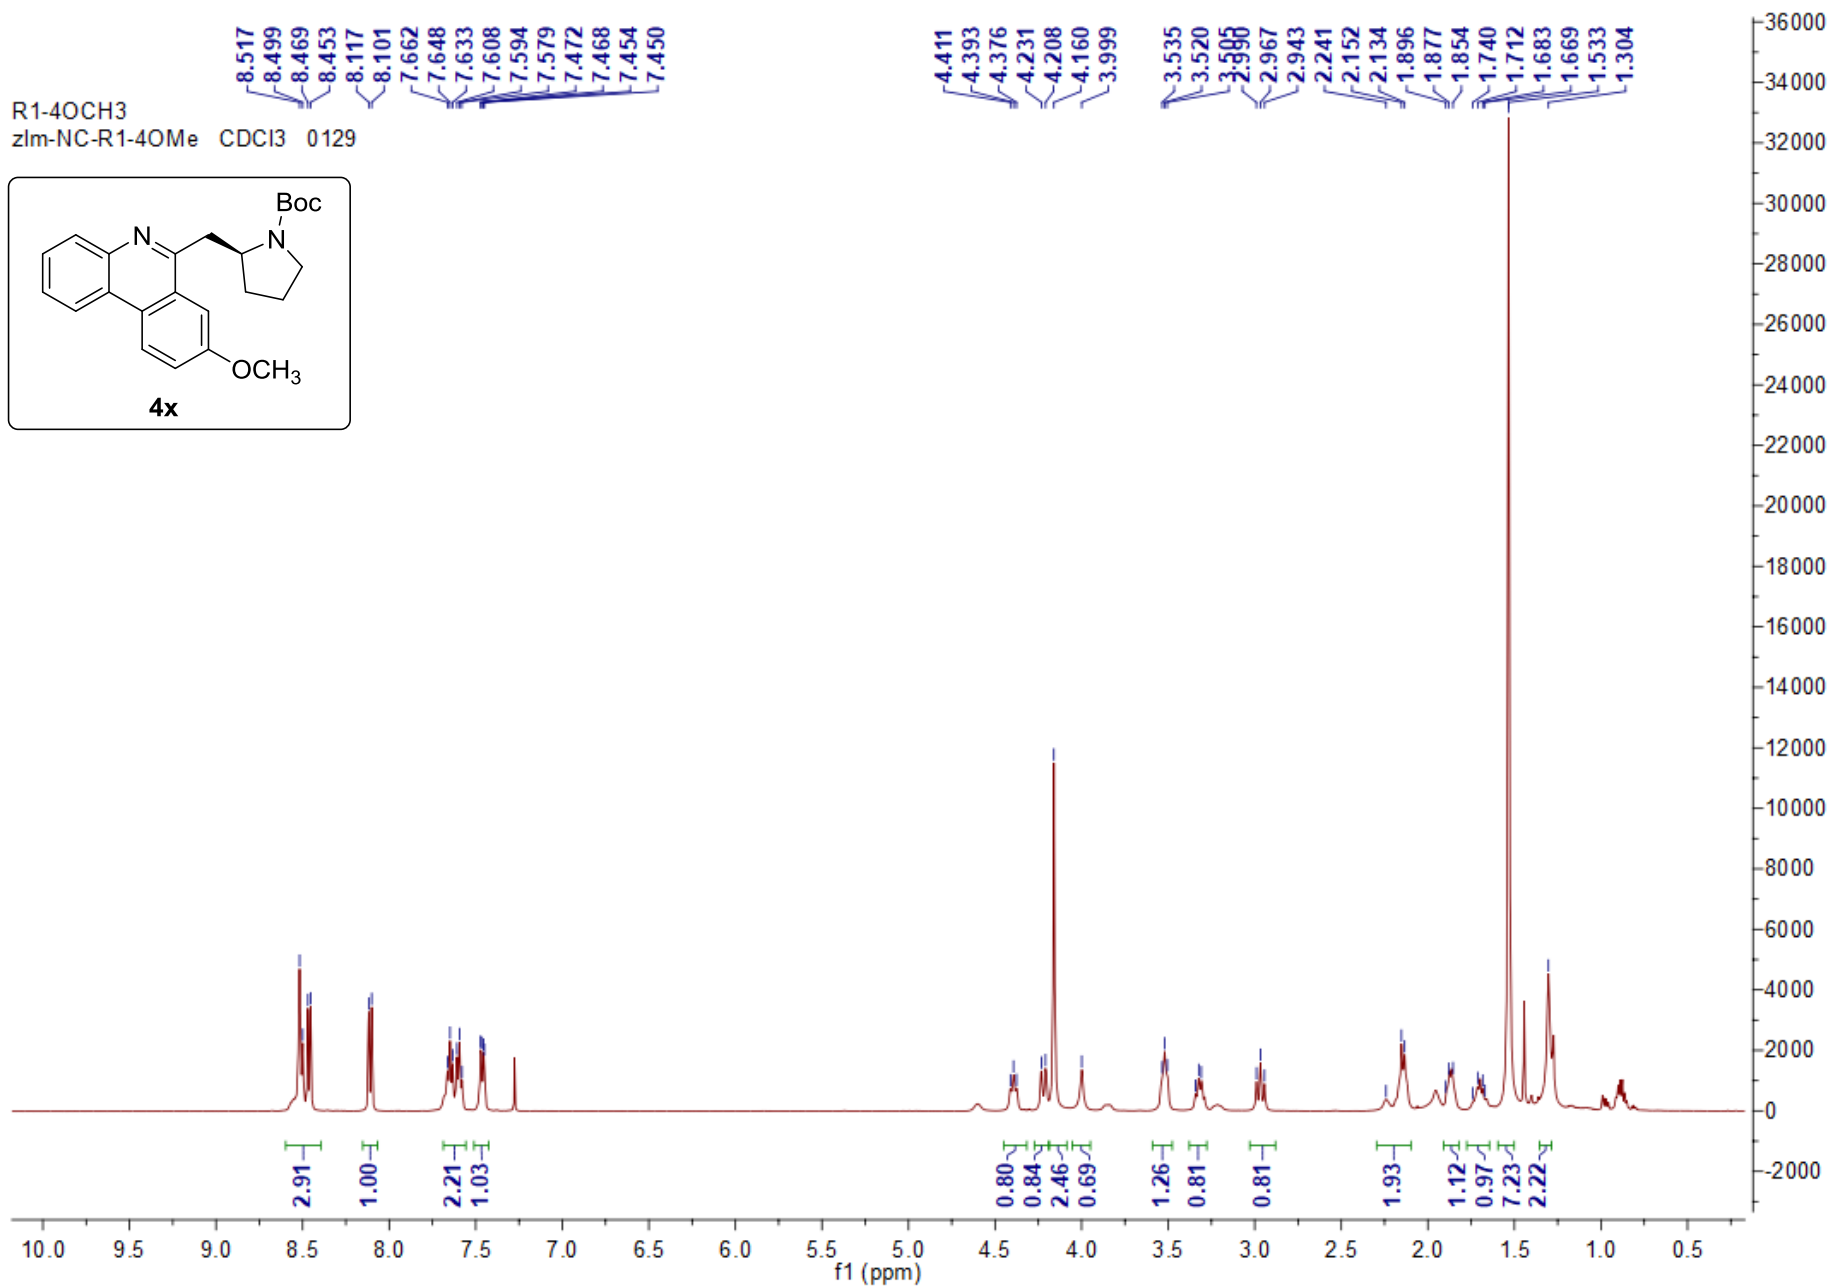

R1-4OCH3  
zlm-NC-R1-4OMe CDCl3 0129

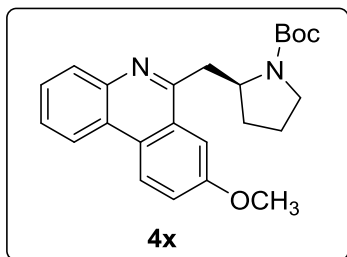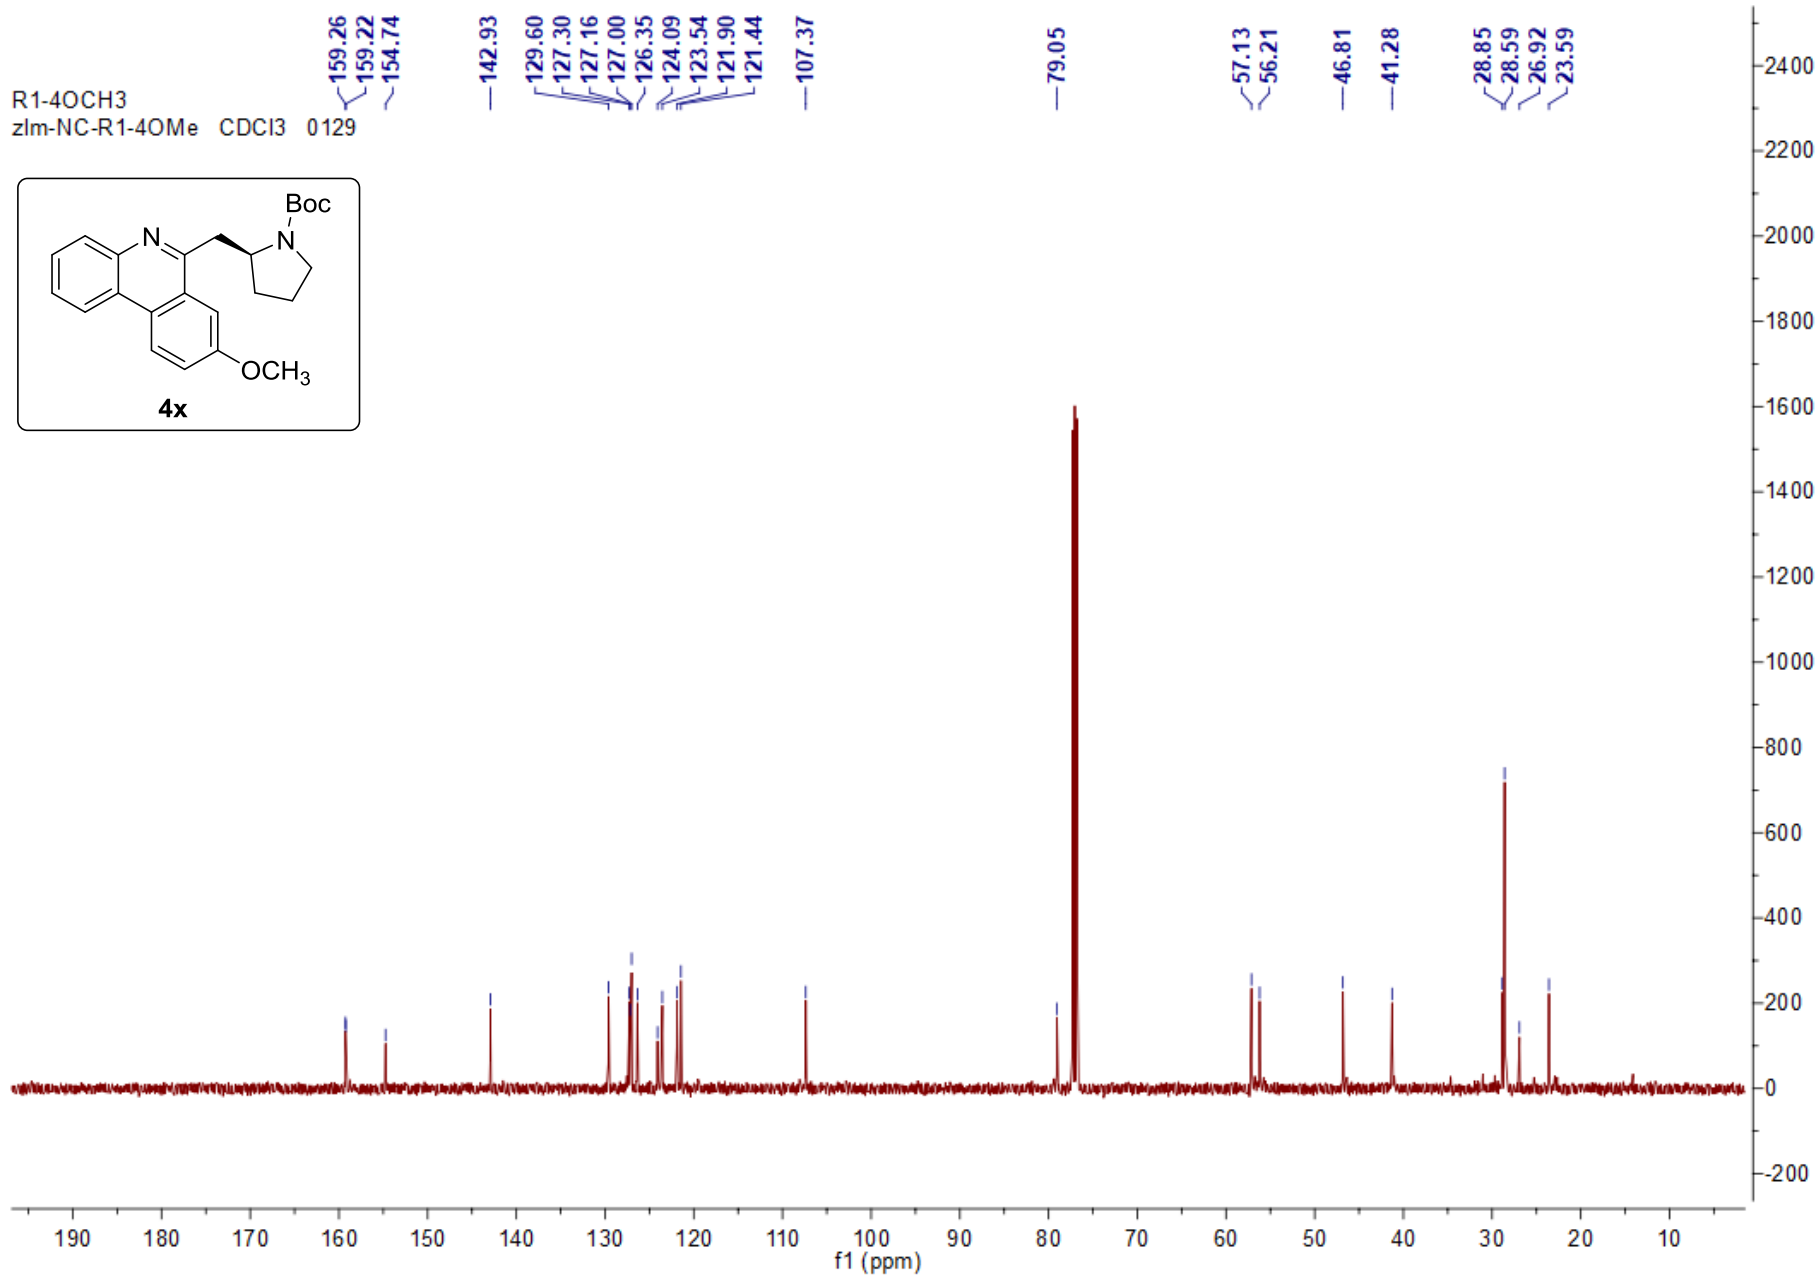



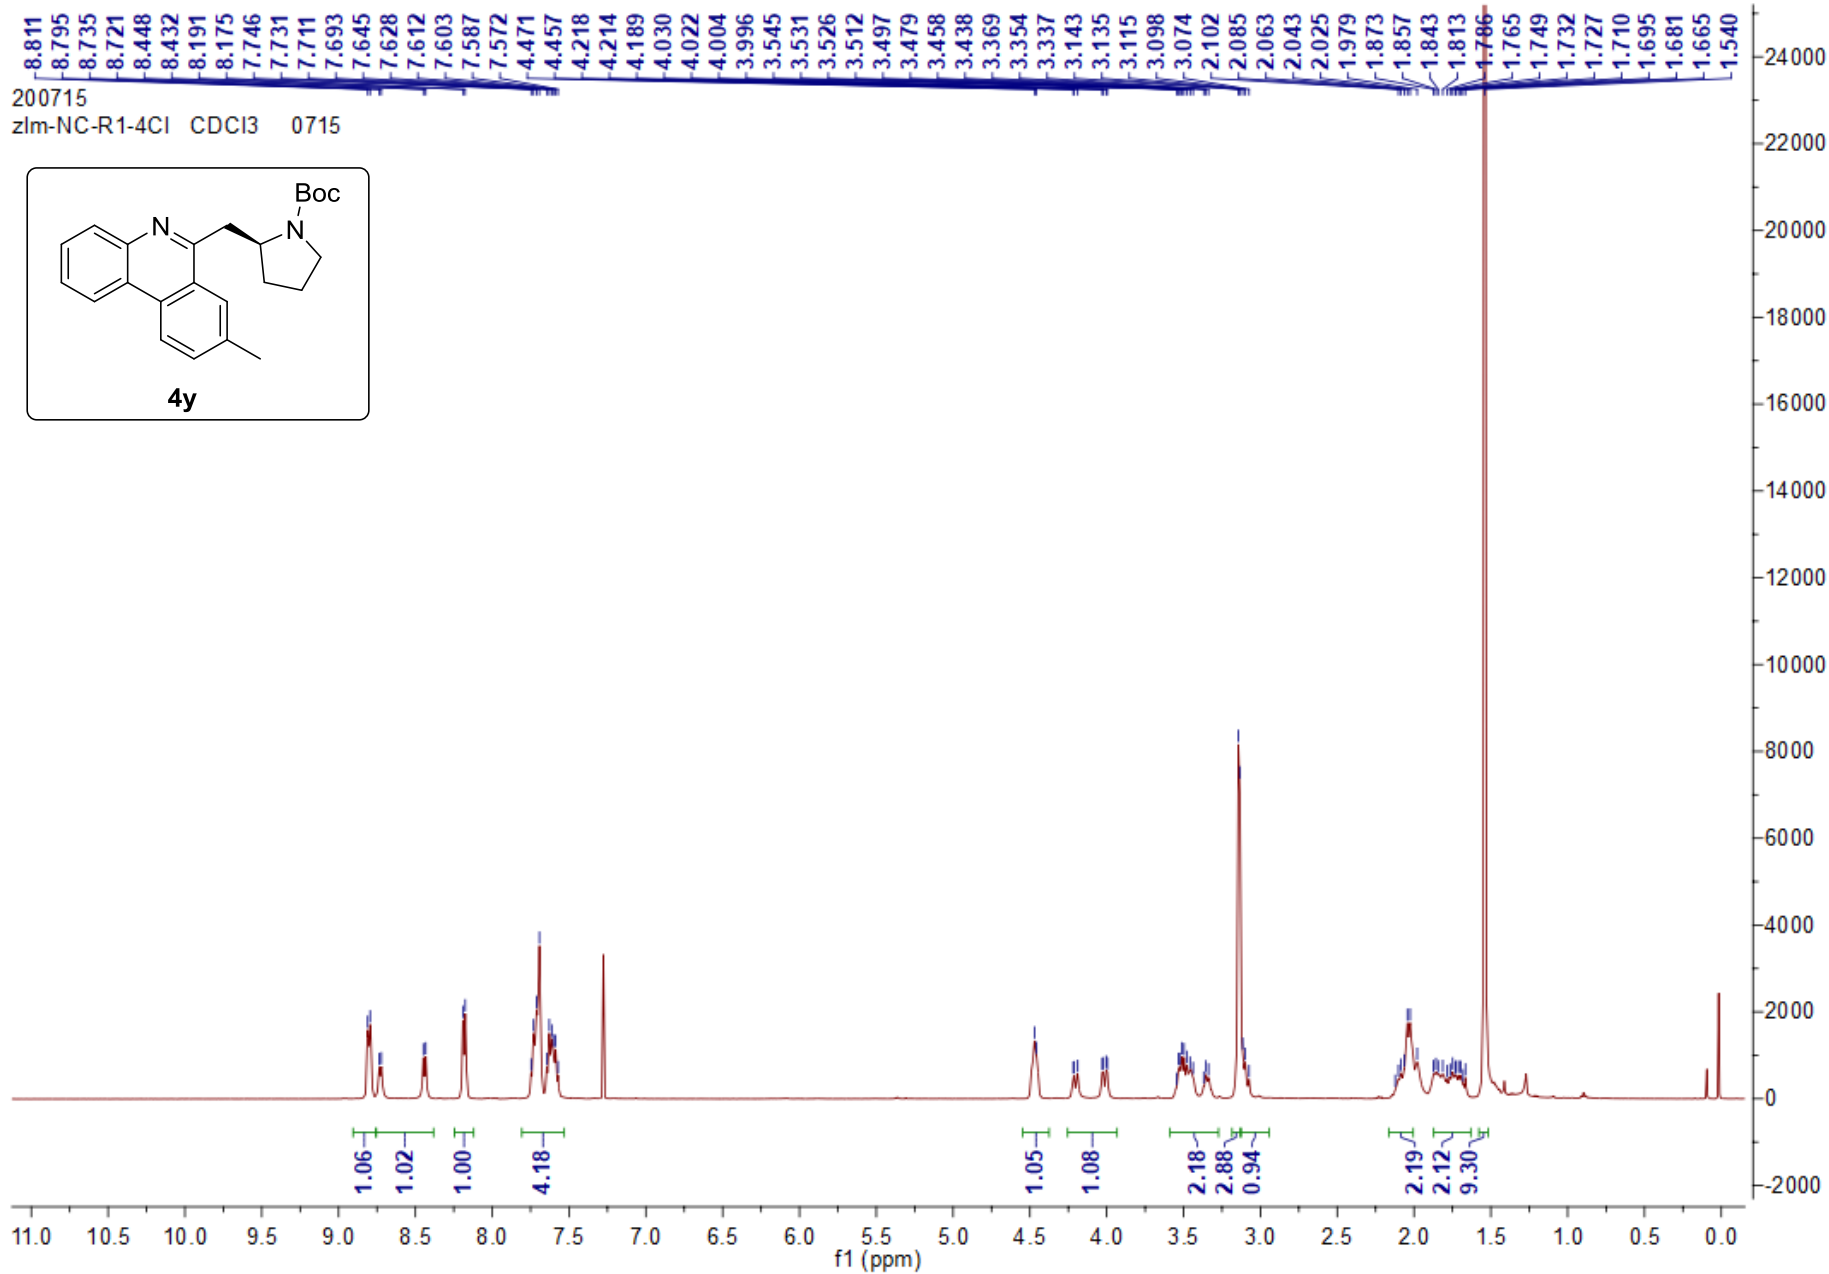

200721  
zlm-NC-R1-4Cl CDCI3 0721

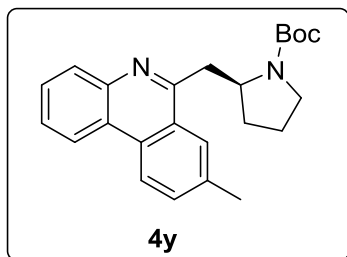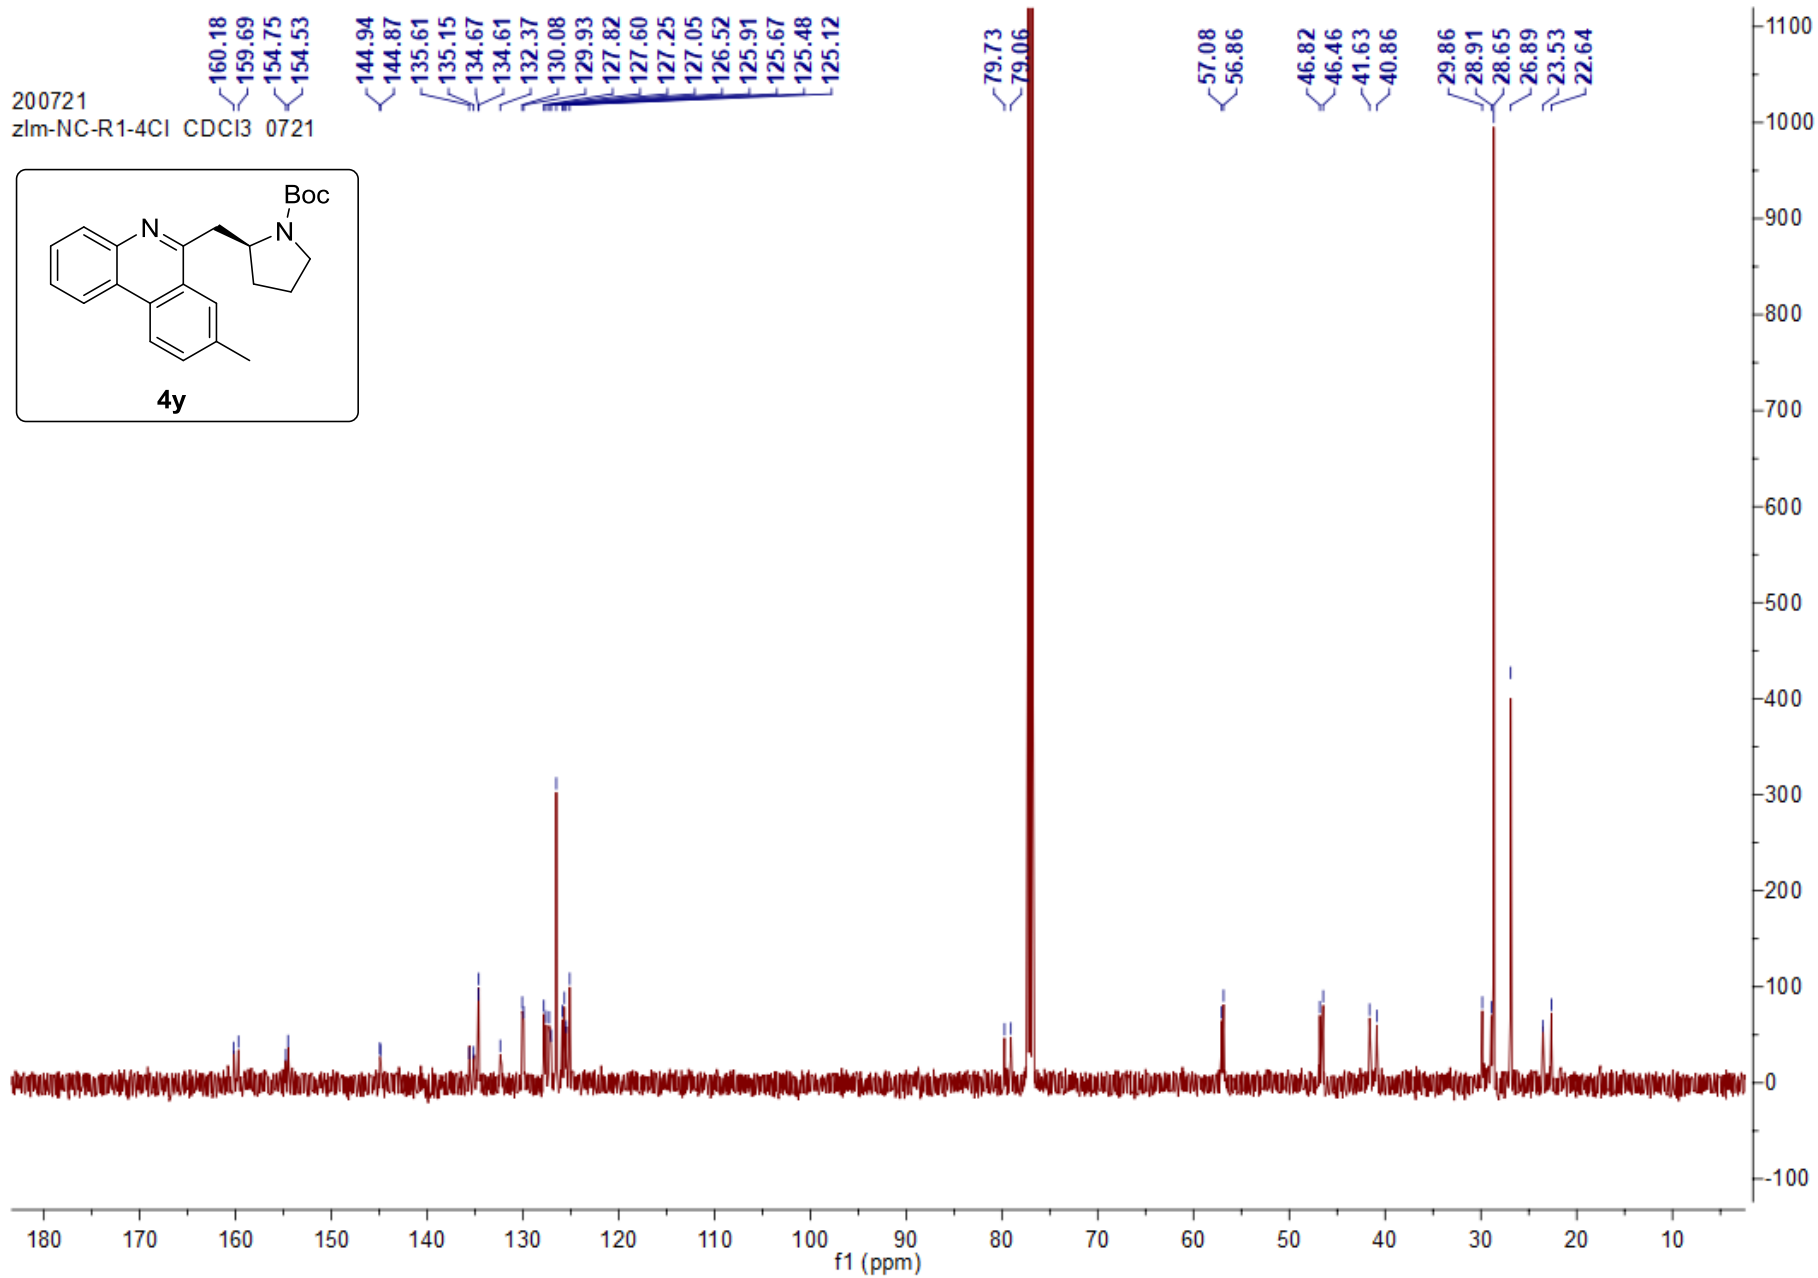

R1-4CF3  
zlm-NC-R1-4CF3 CDCl3 0129

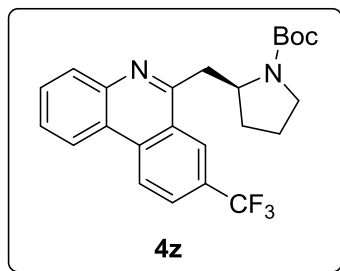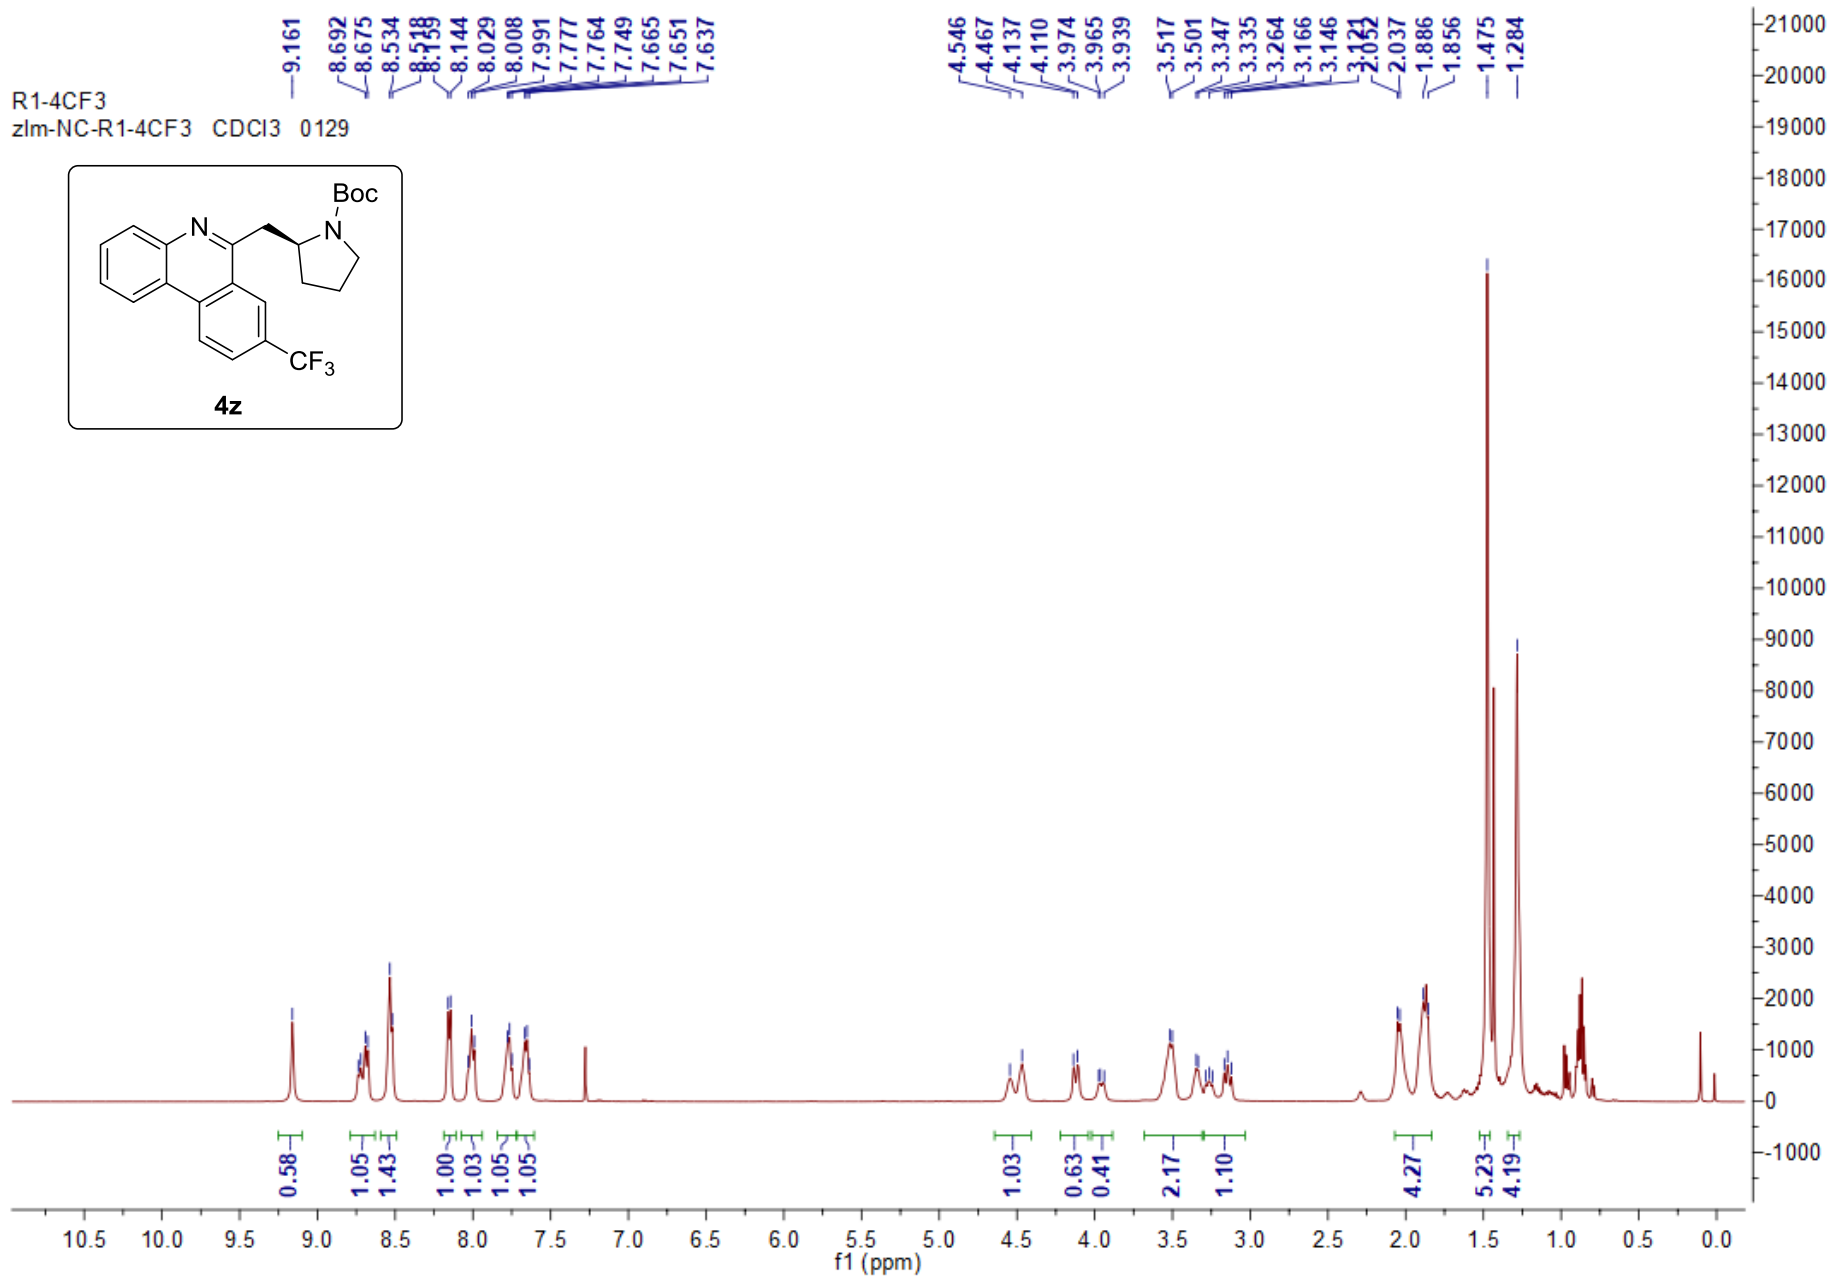

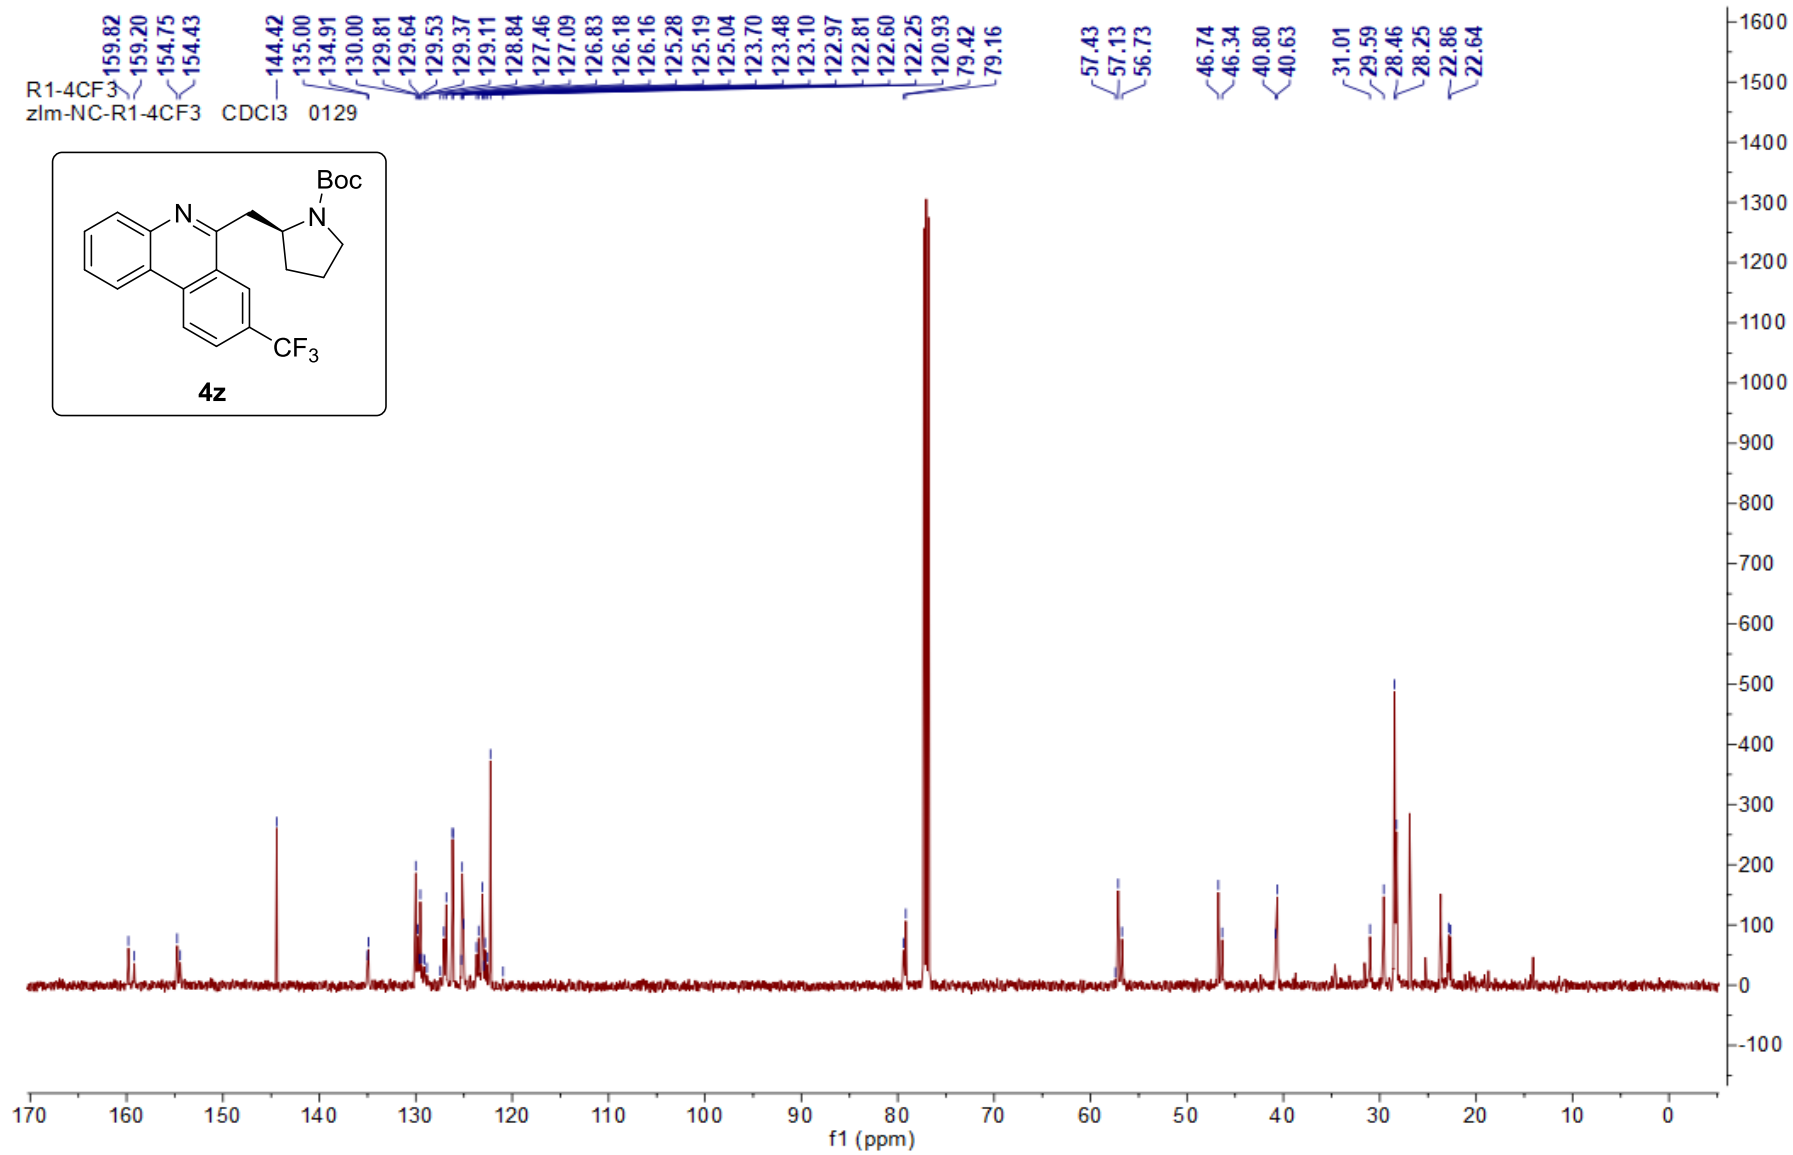

200708  
zlm-NC-R2-5CF3 CDCl3 0708

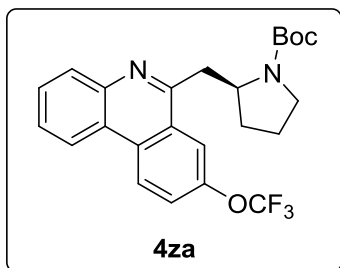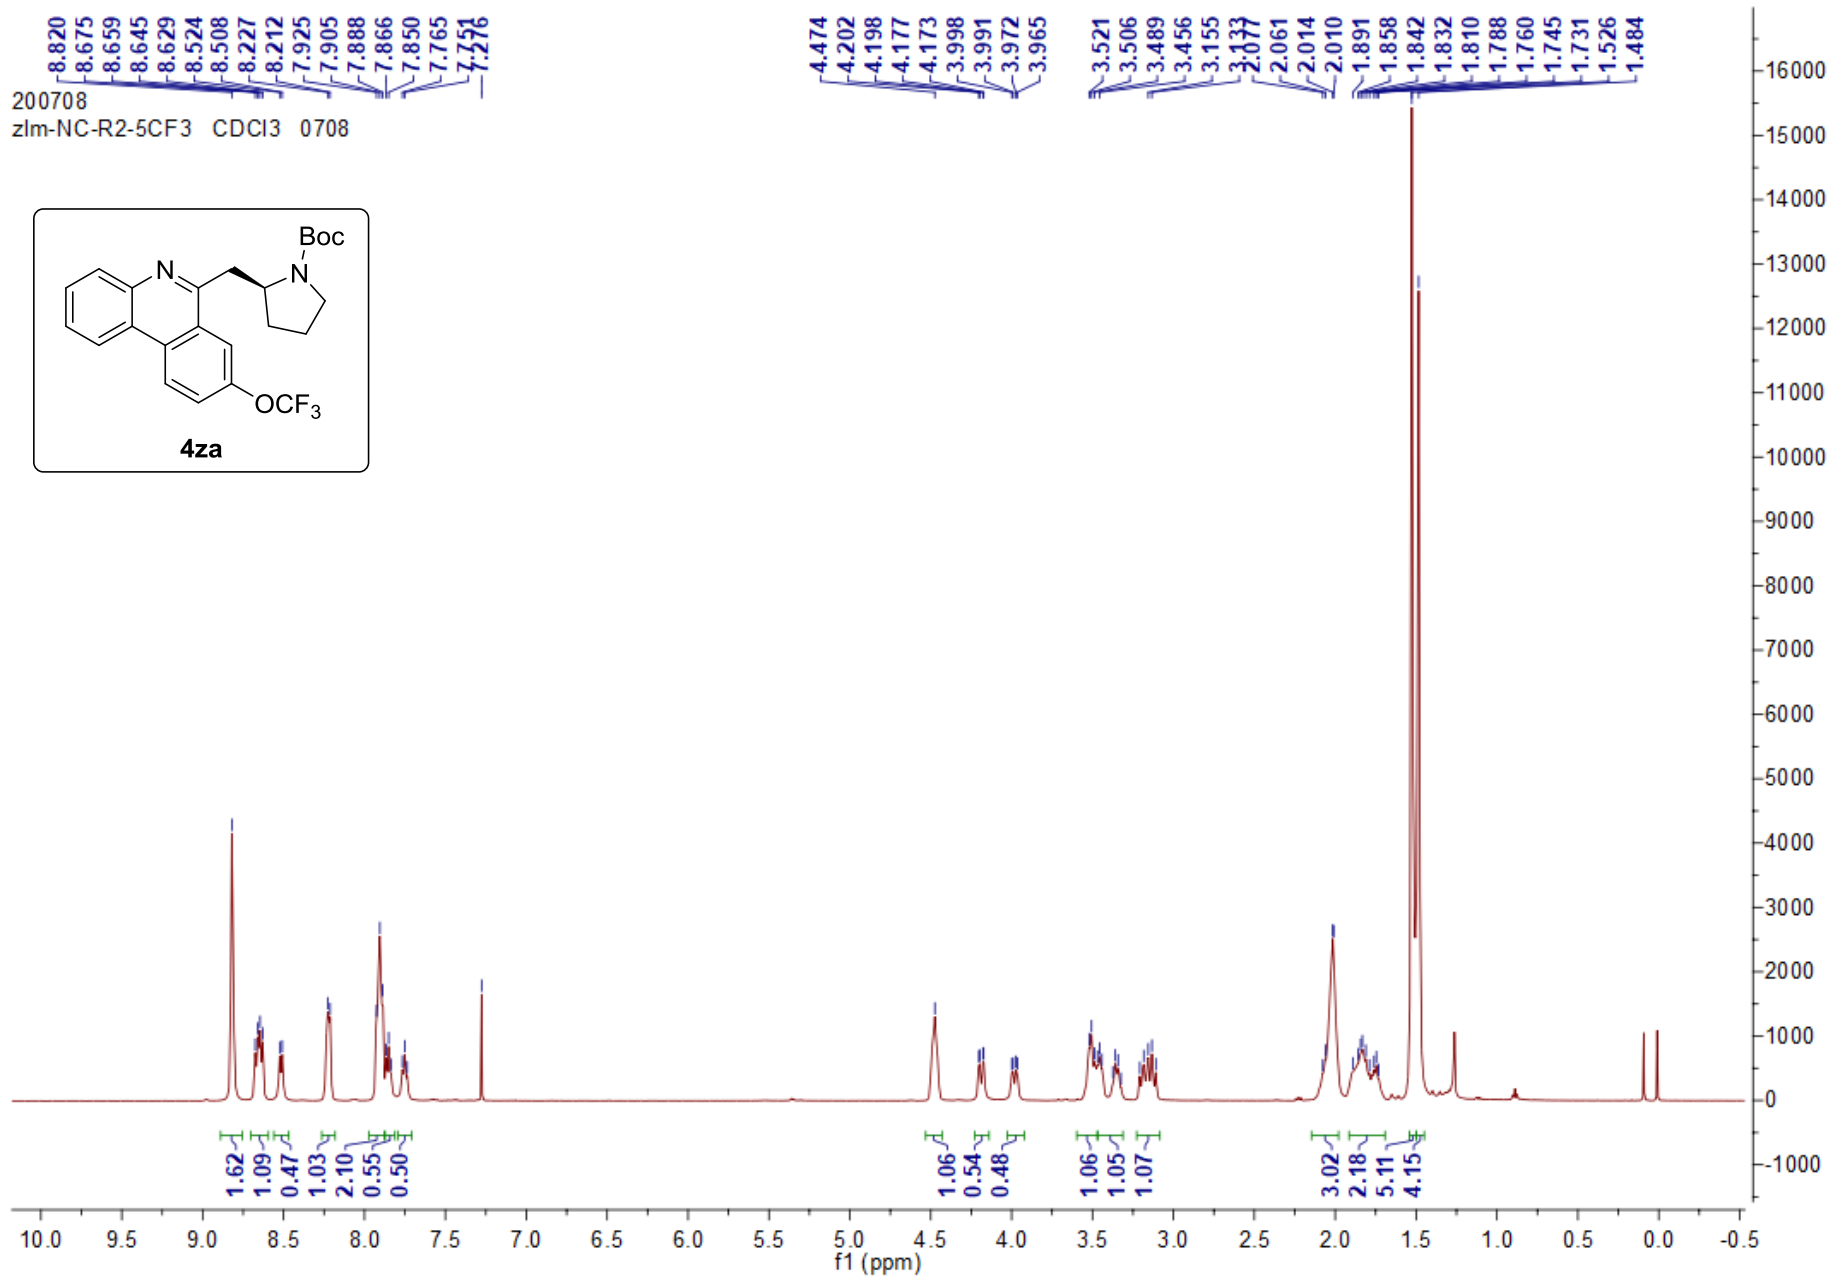

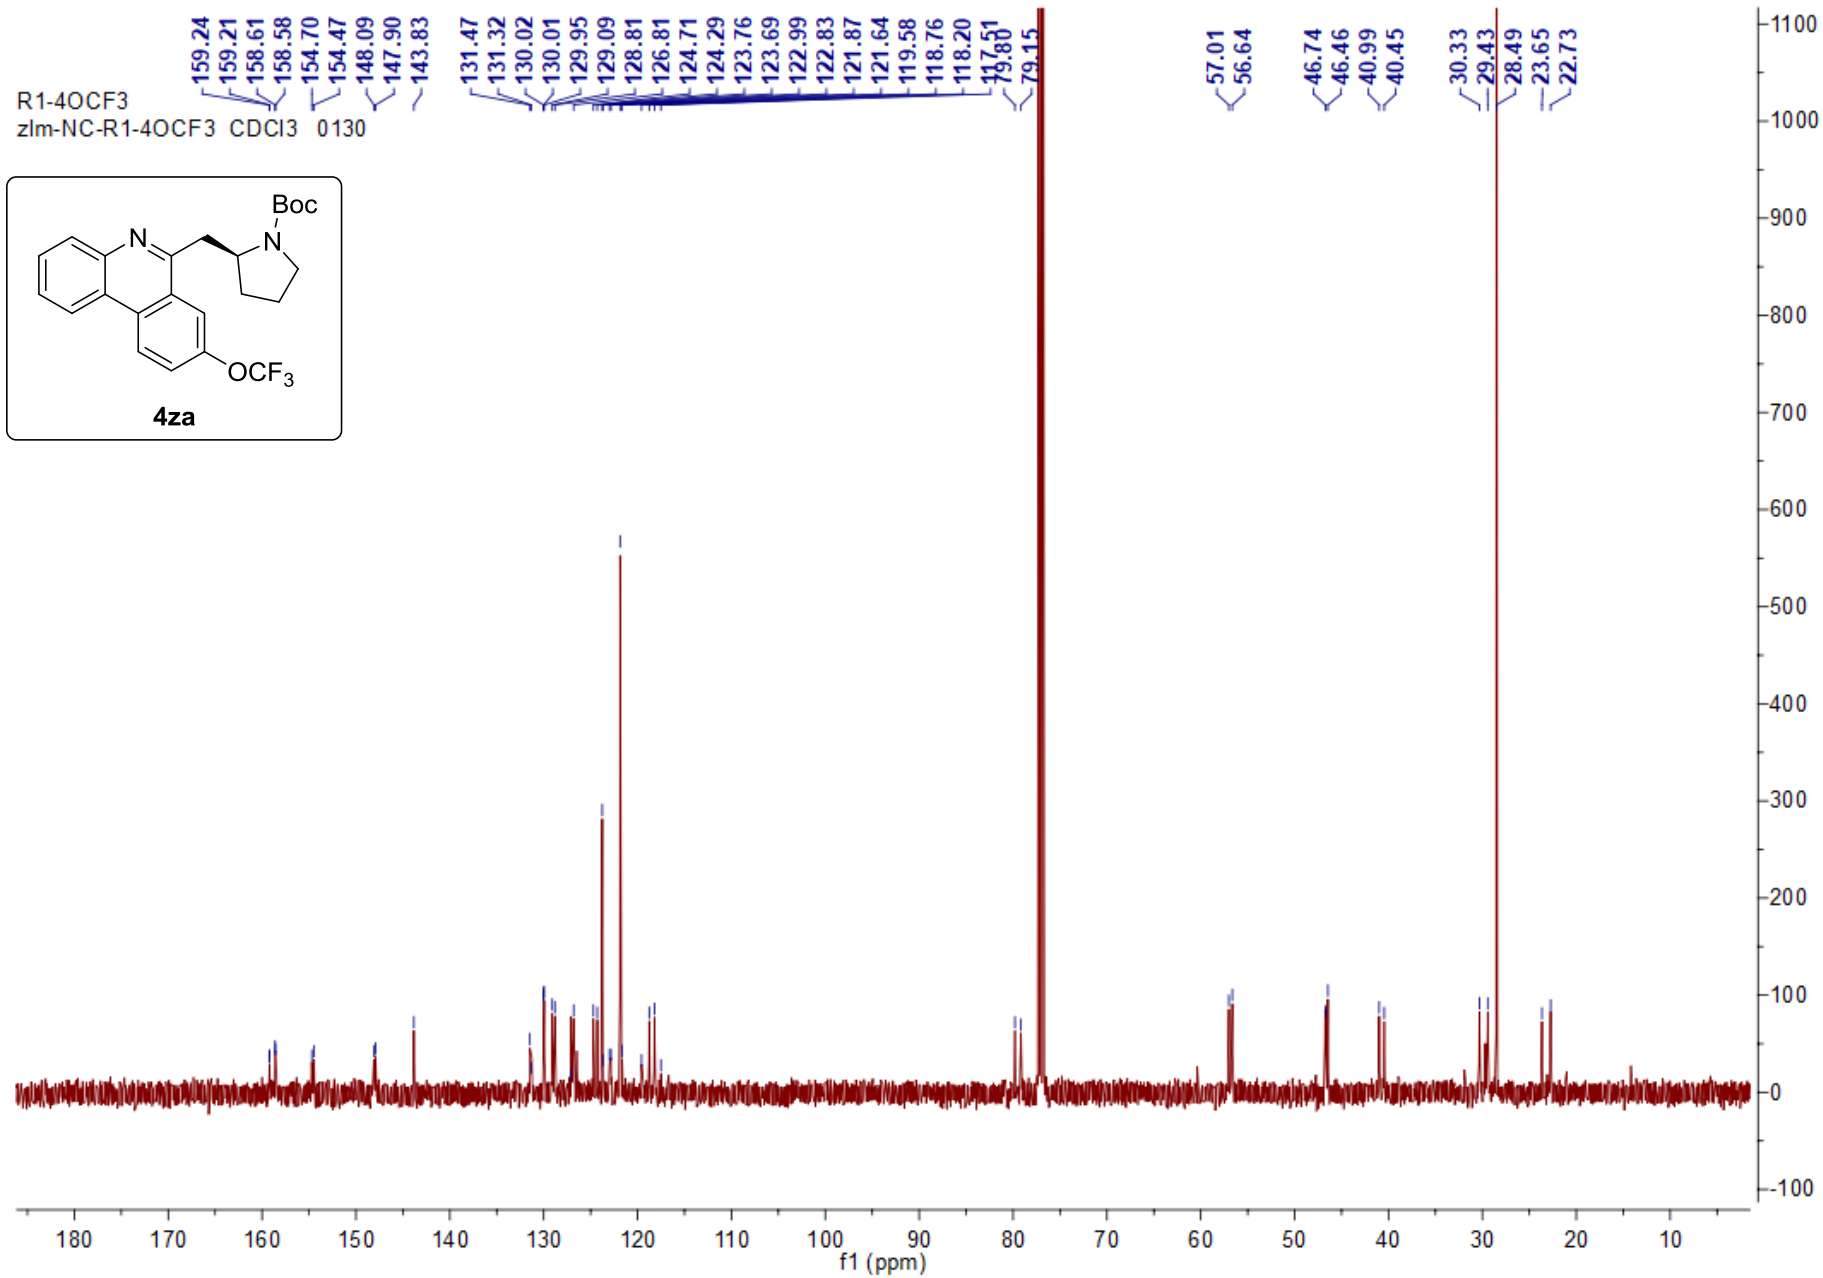

200708  
zlm-NC-R2-5CF3 CDCl3 0708

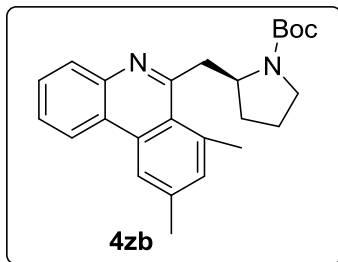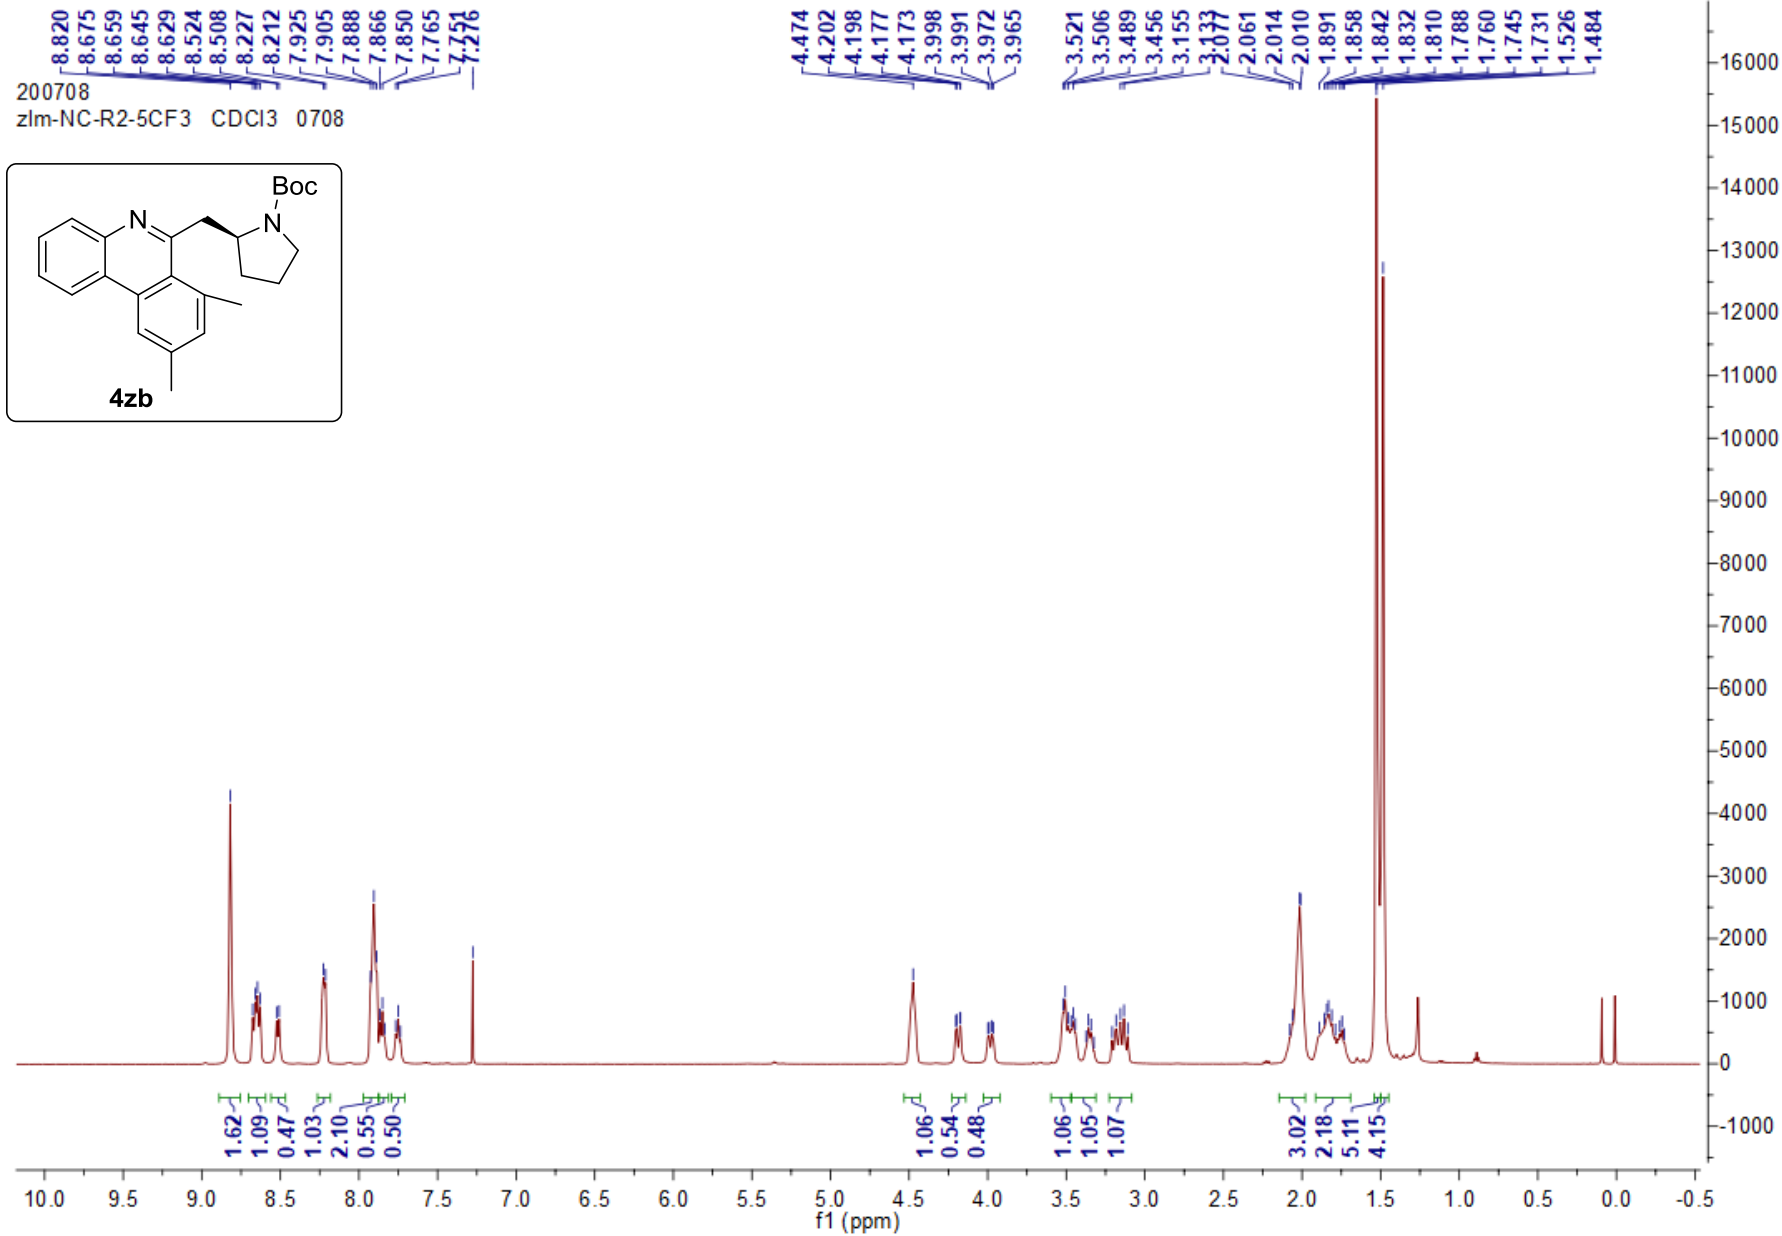

R1-3, 5CH3  
zlm-NC-3,5-CH3 CDCl3 1203

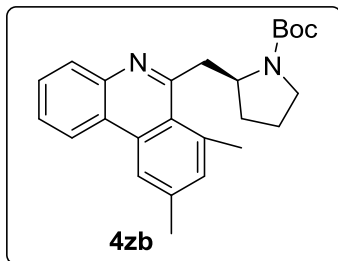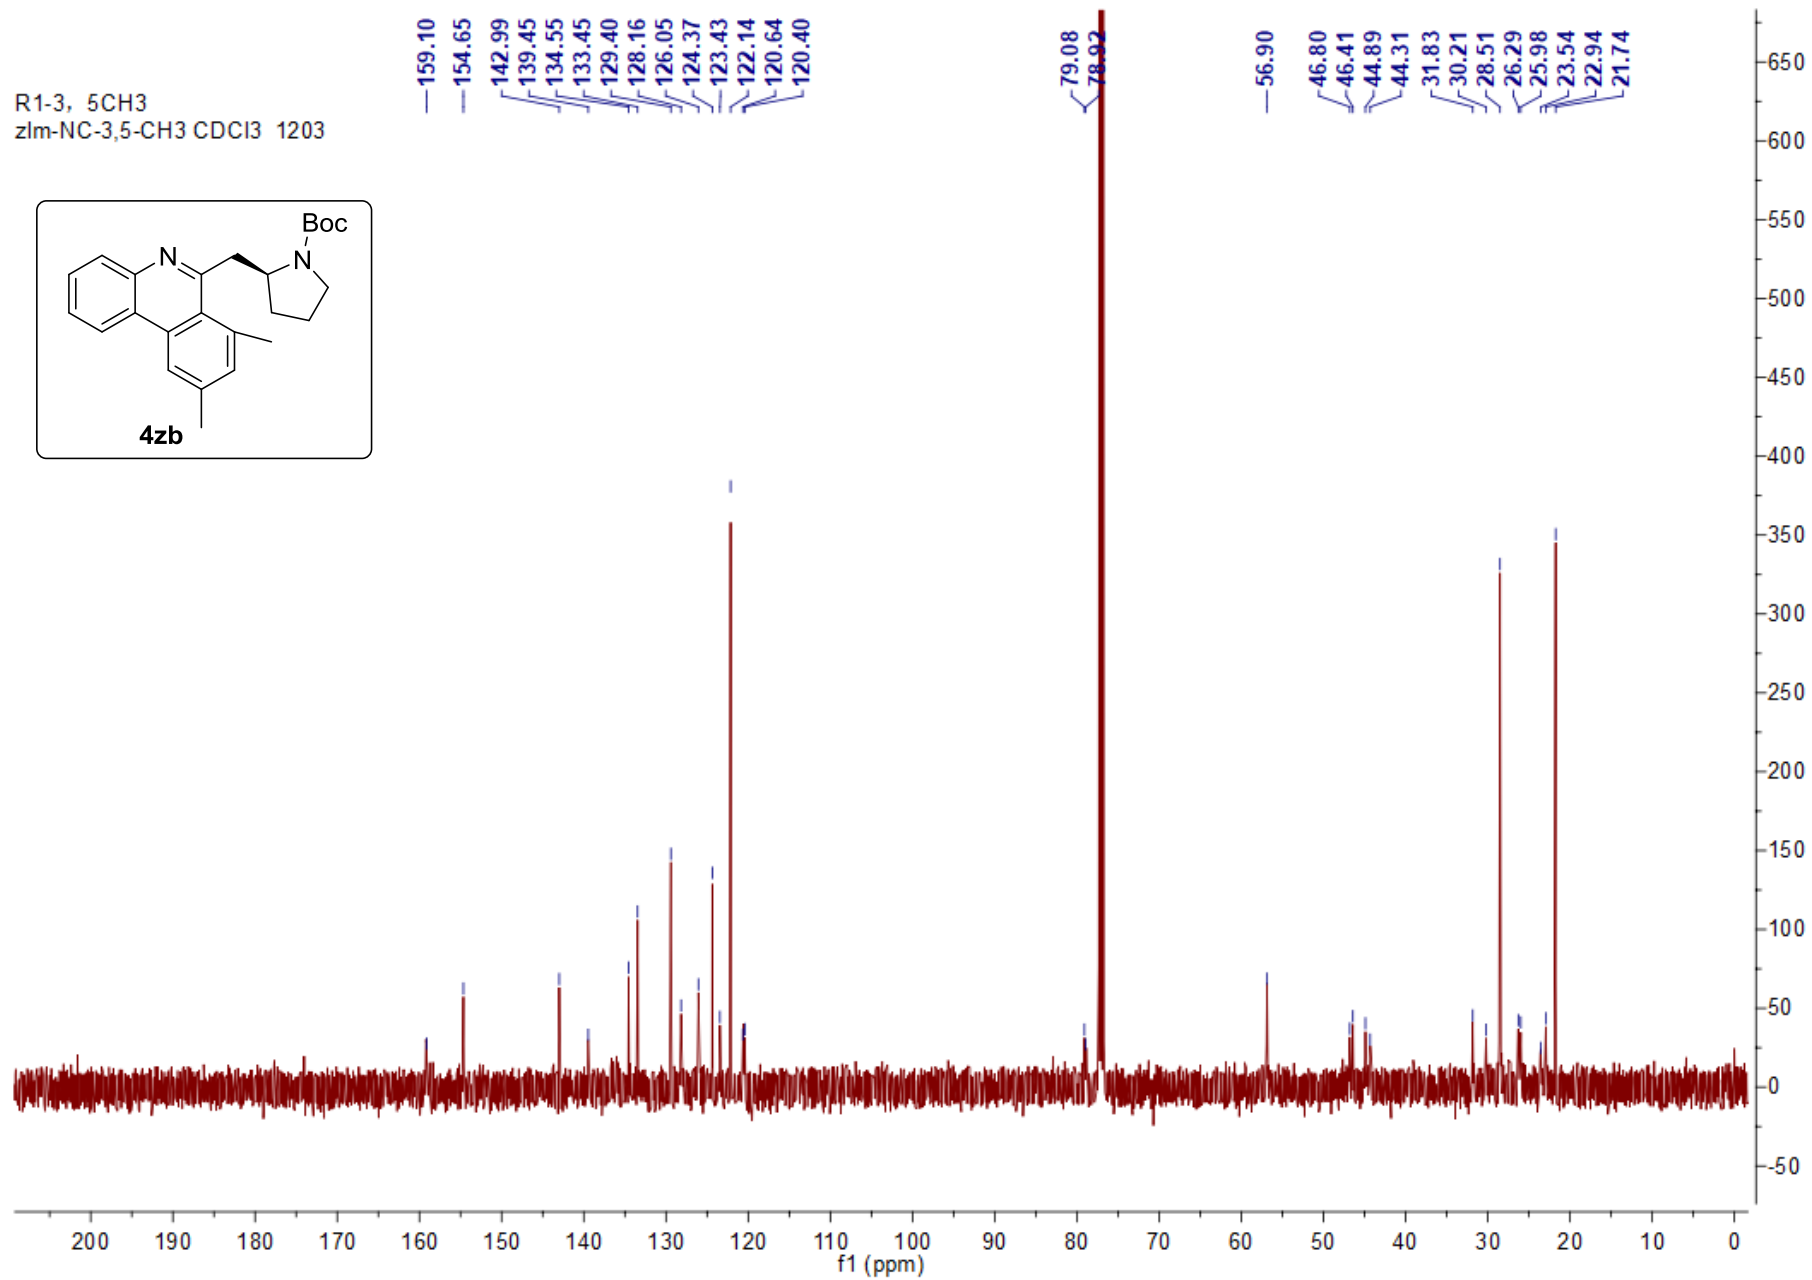



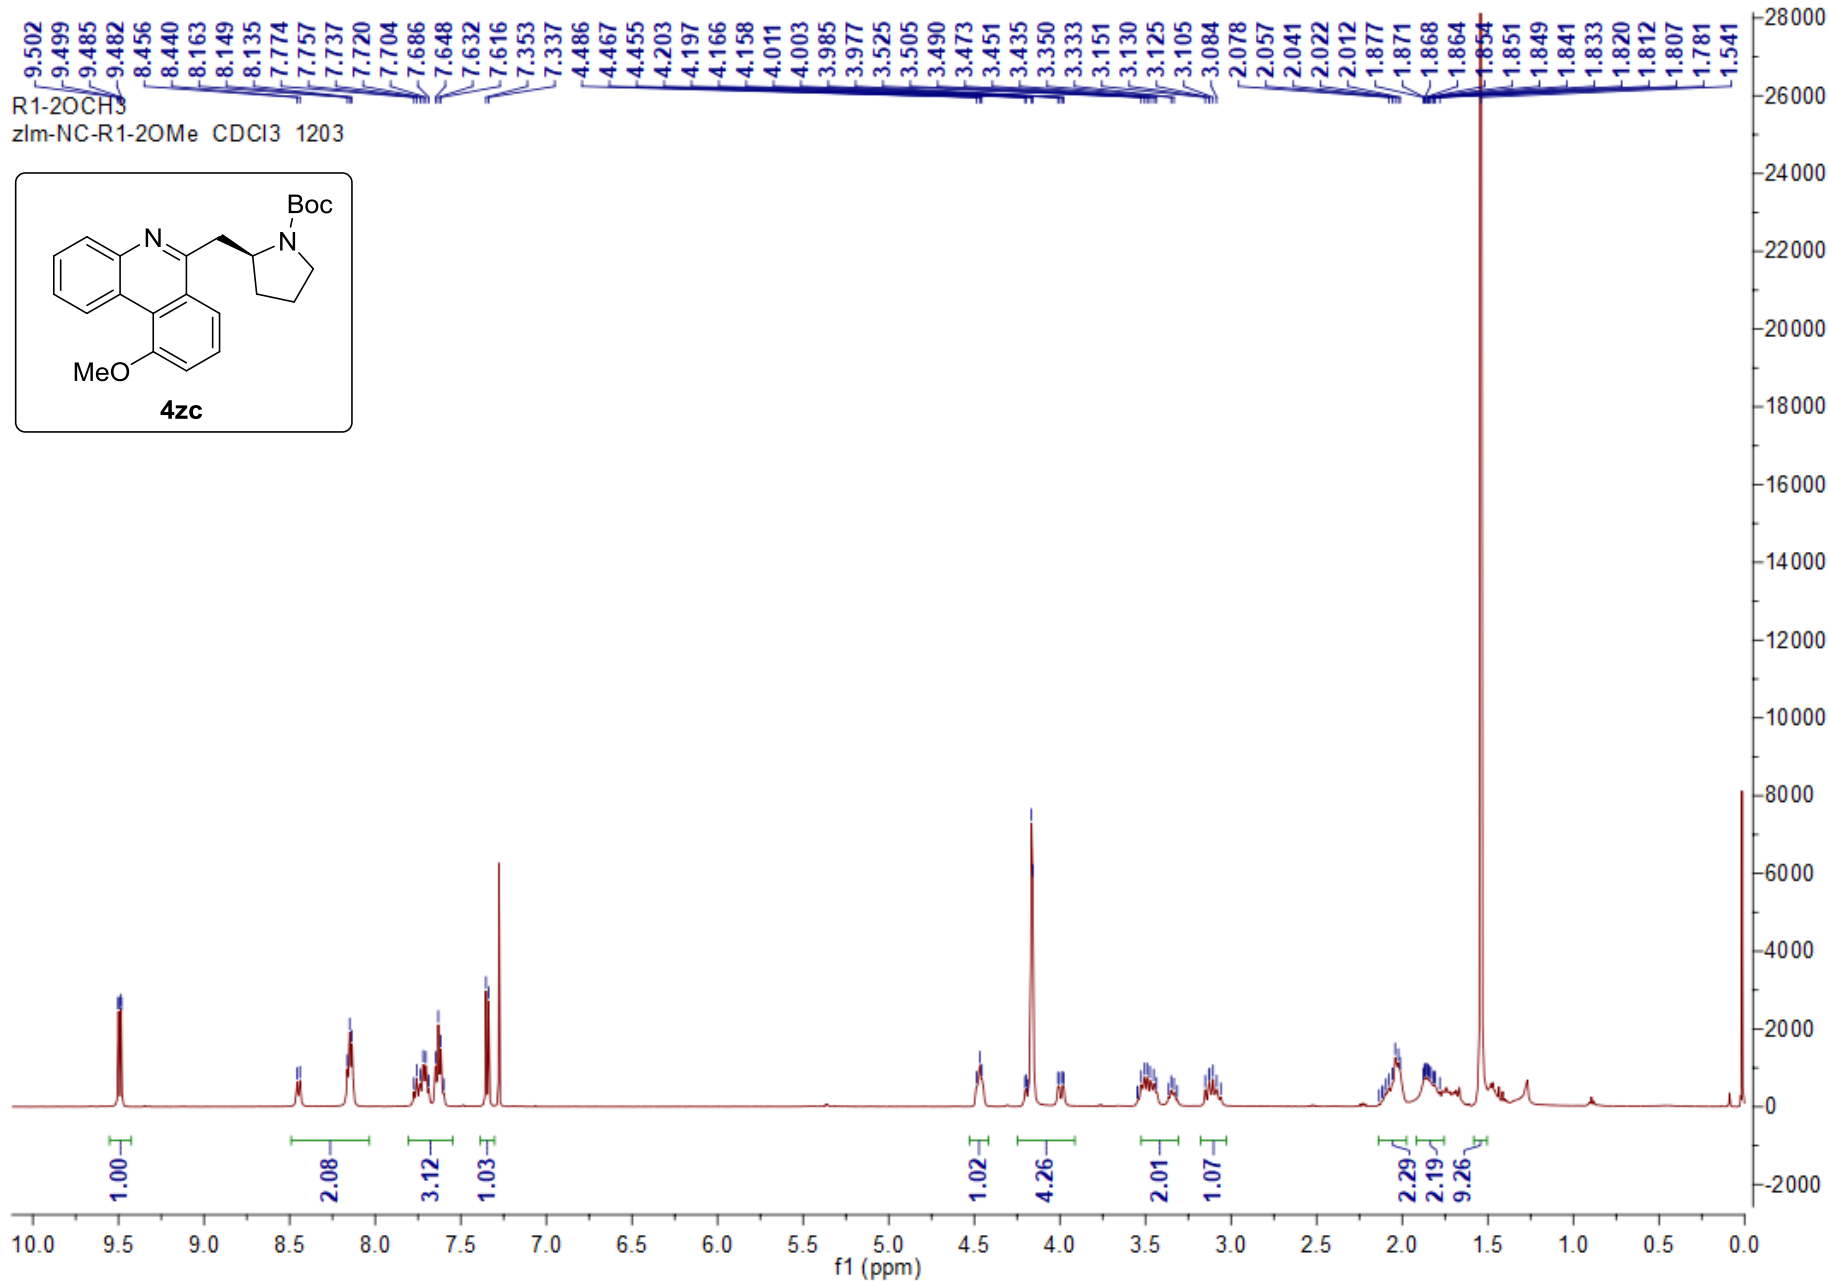

R1-2OCH3  
zlm-NC-R1-2OMe CDCl3 0130

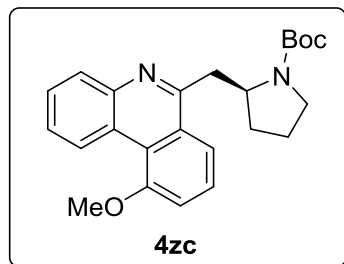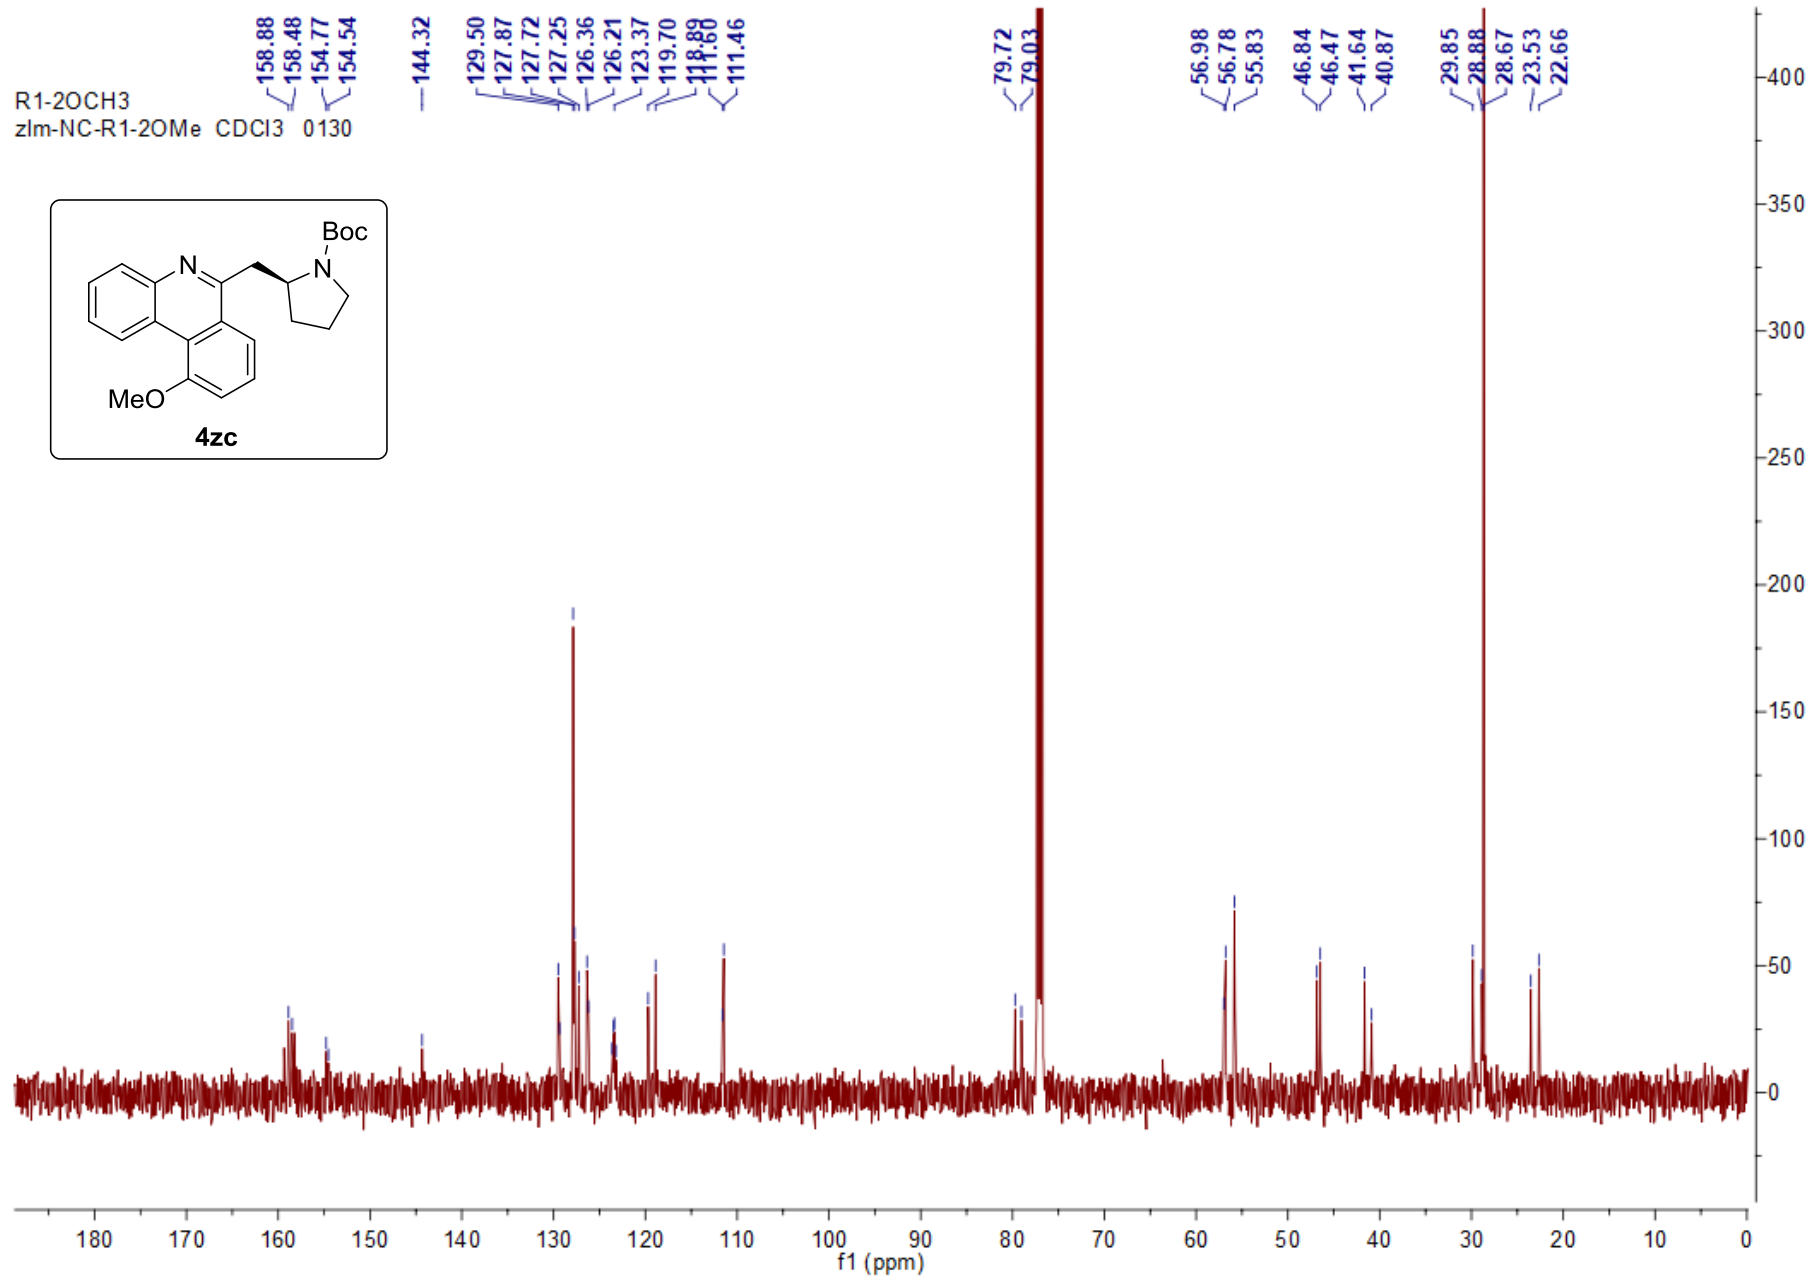

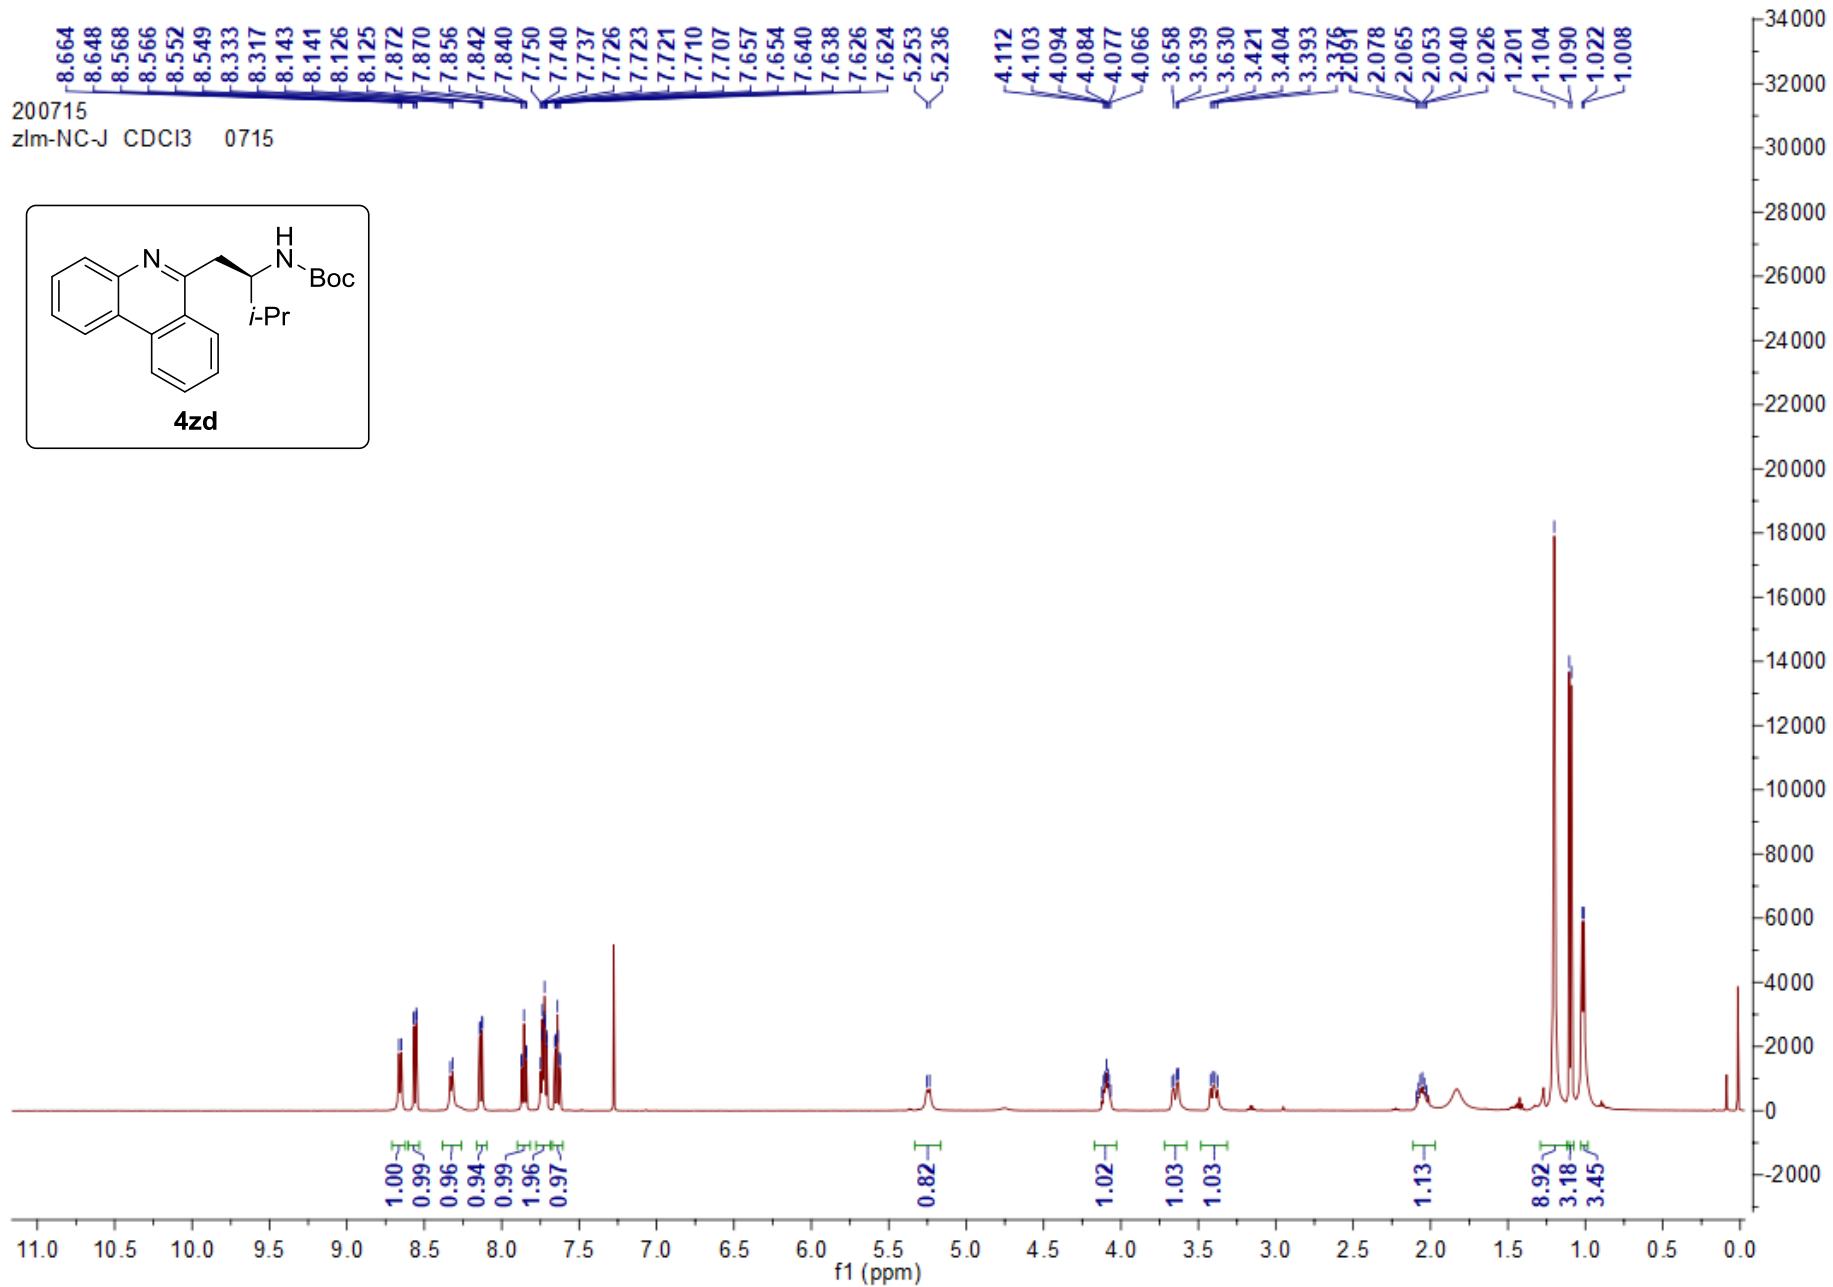

200721  
zlm-NC-J CDCl3 0721

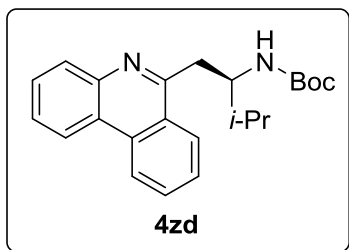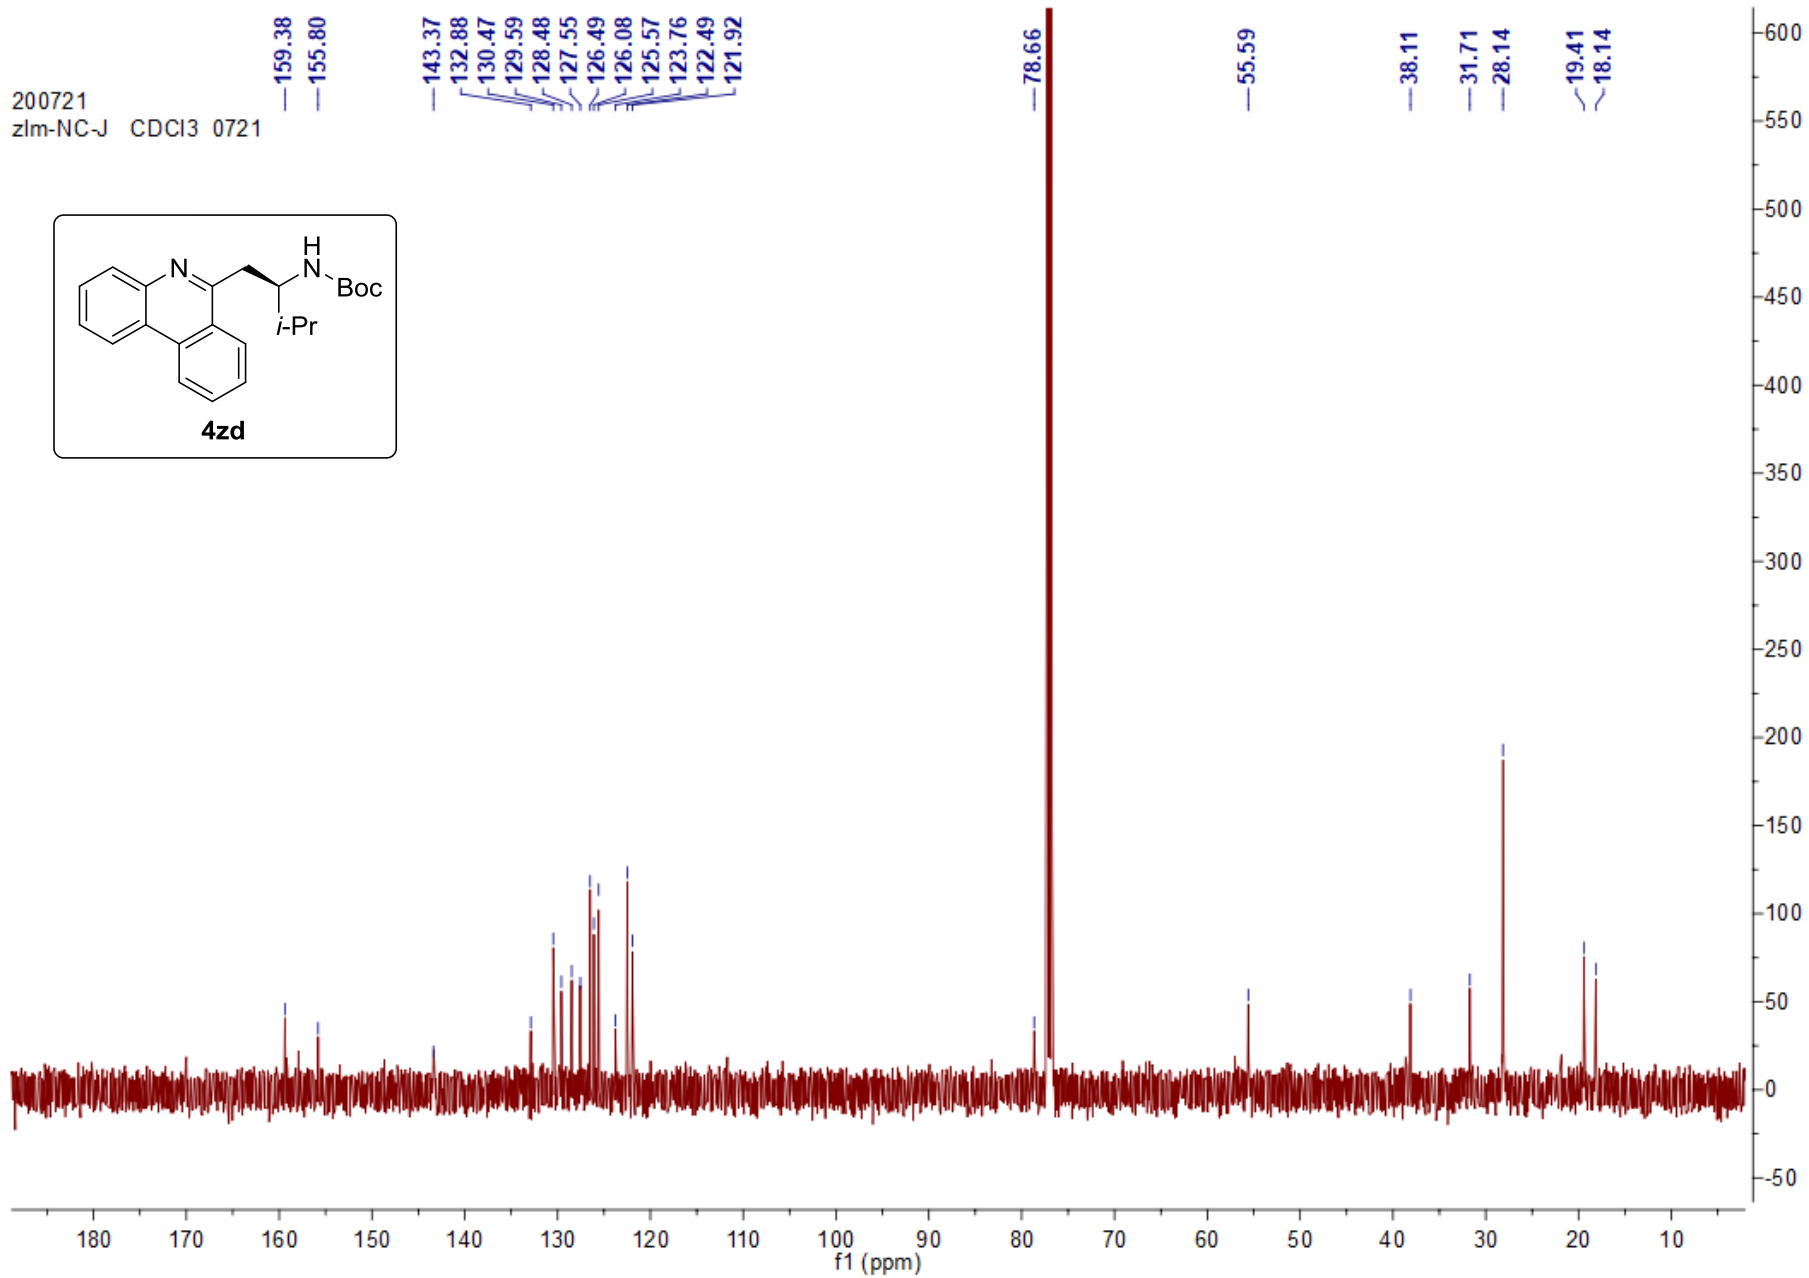

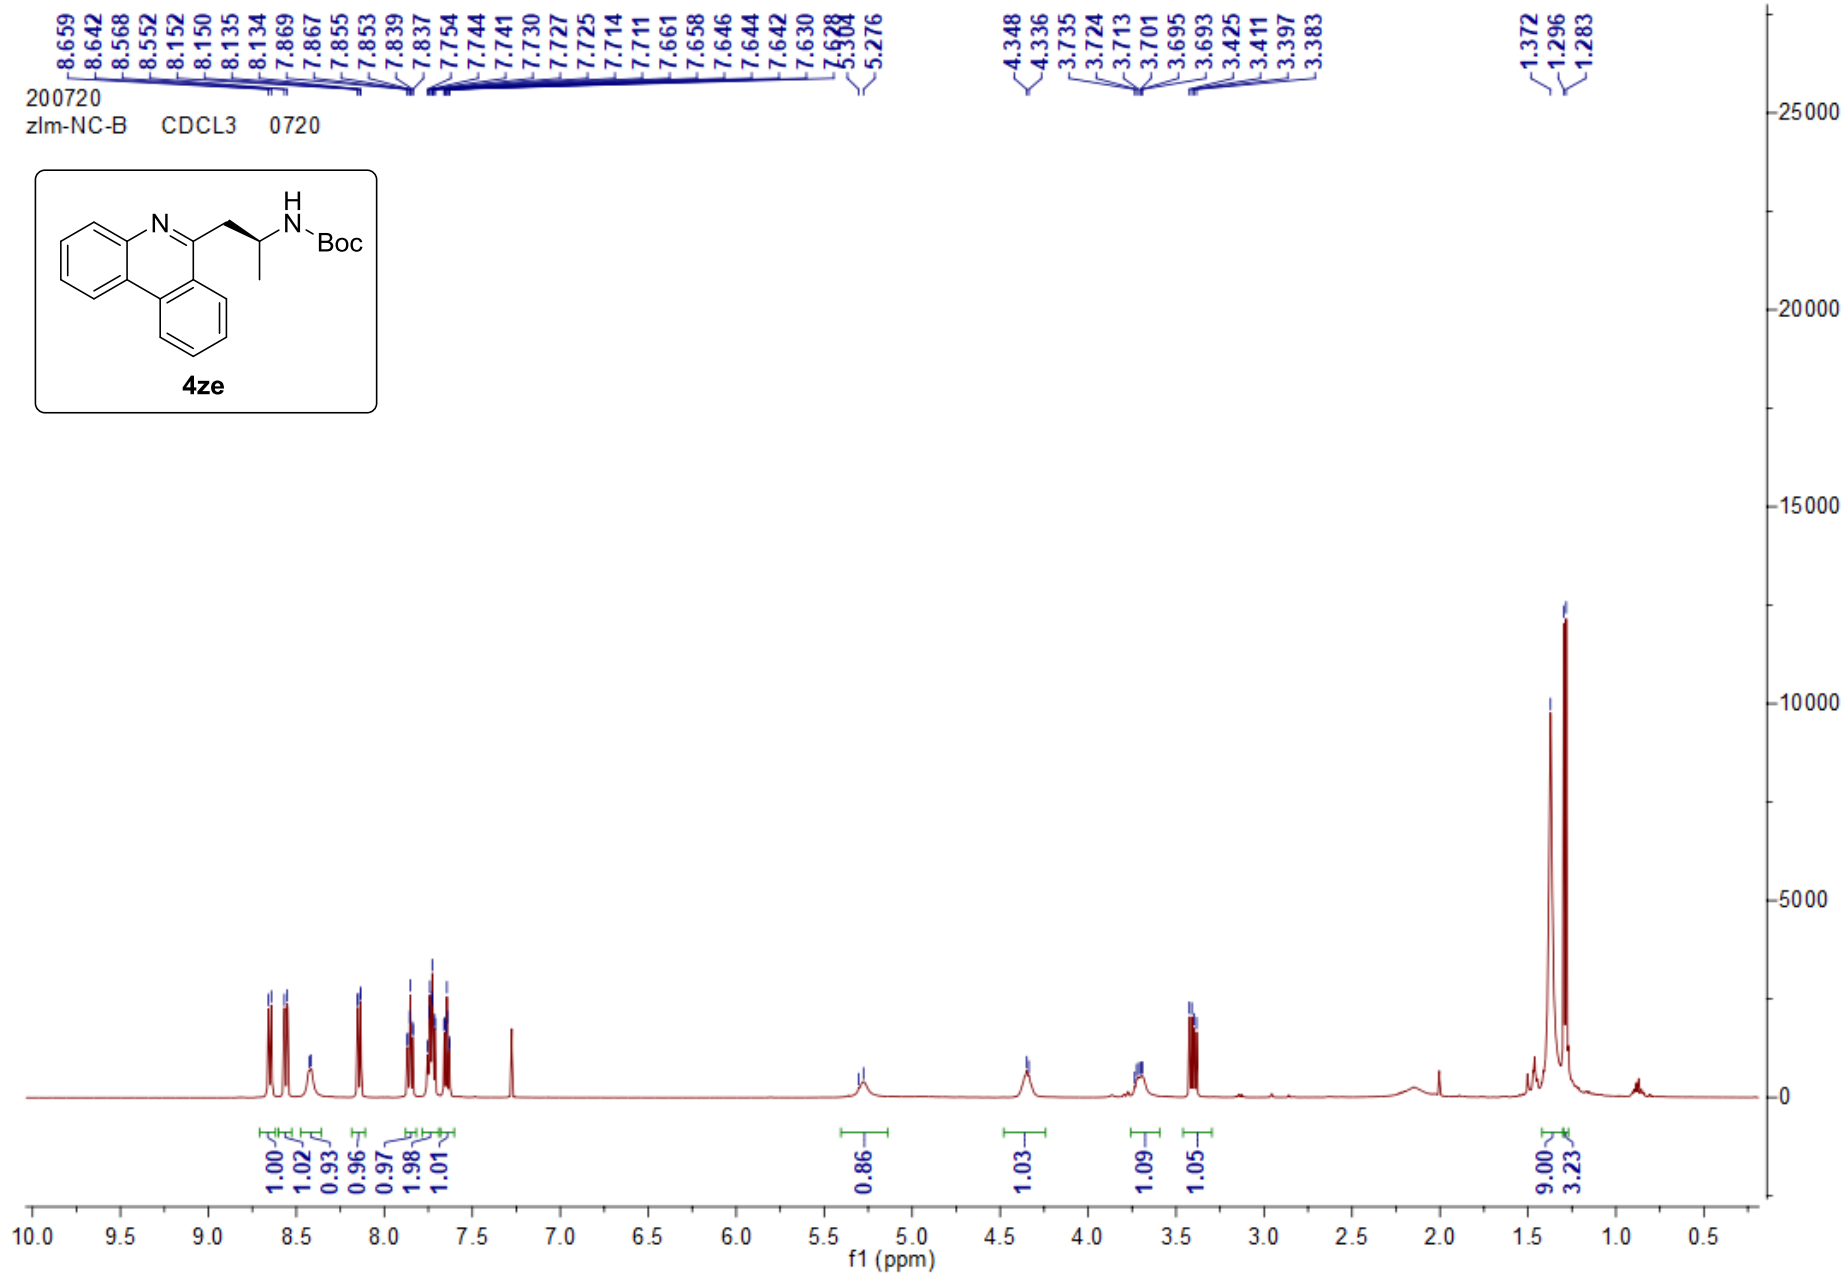

200723  
zlm-NC-B CDCL3 0723

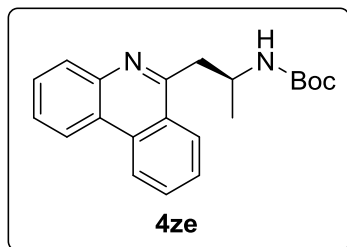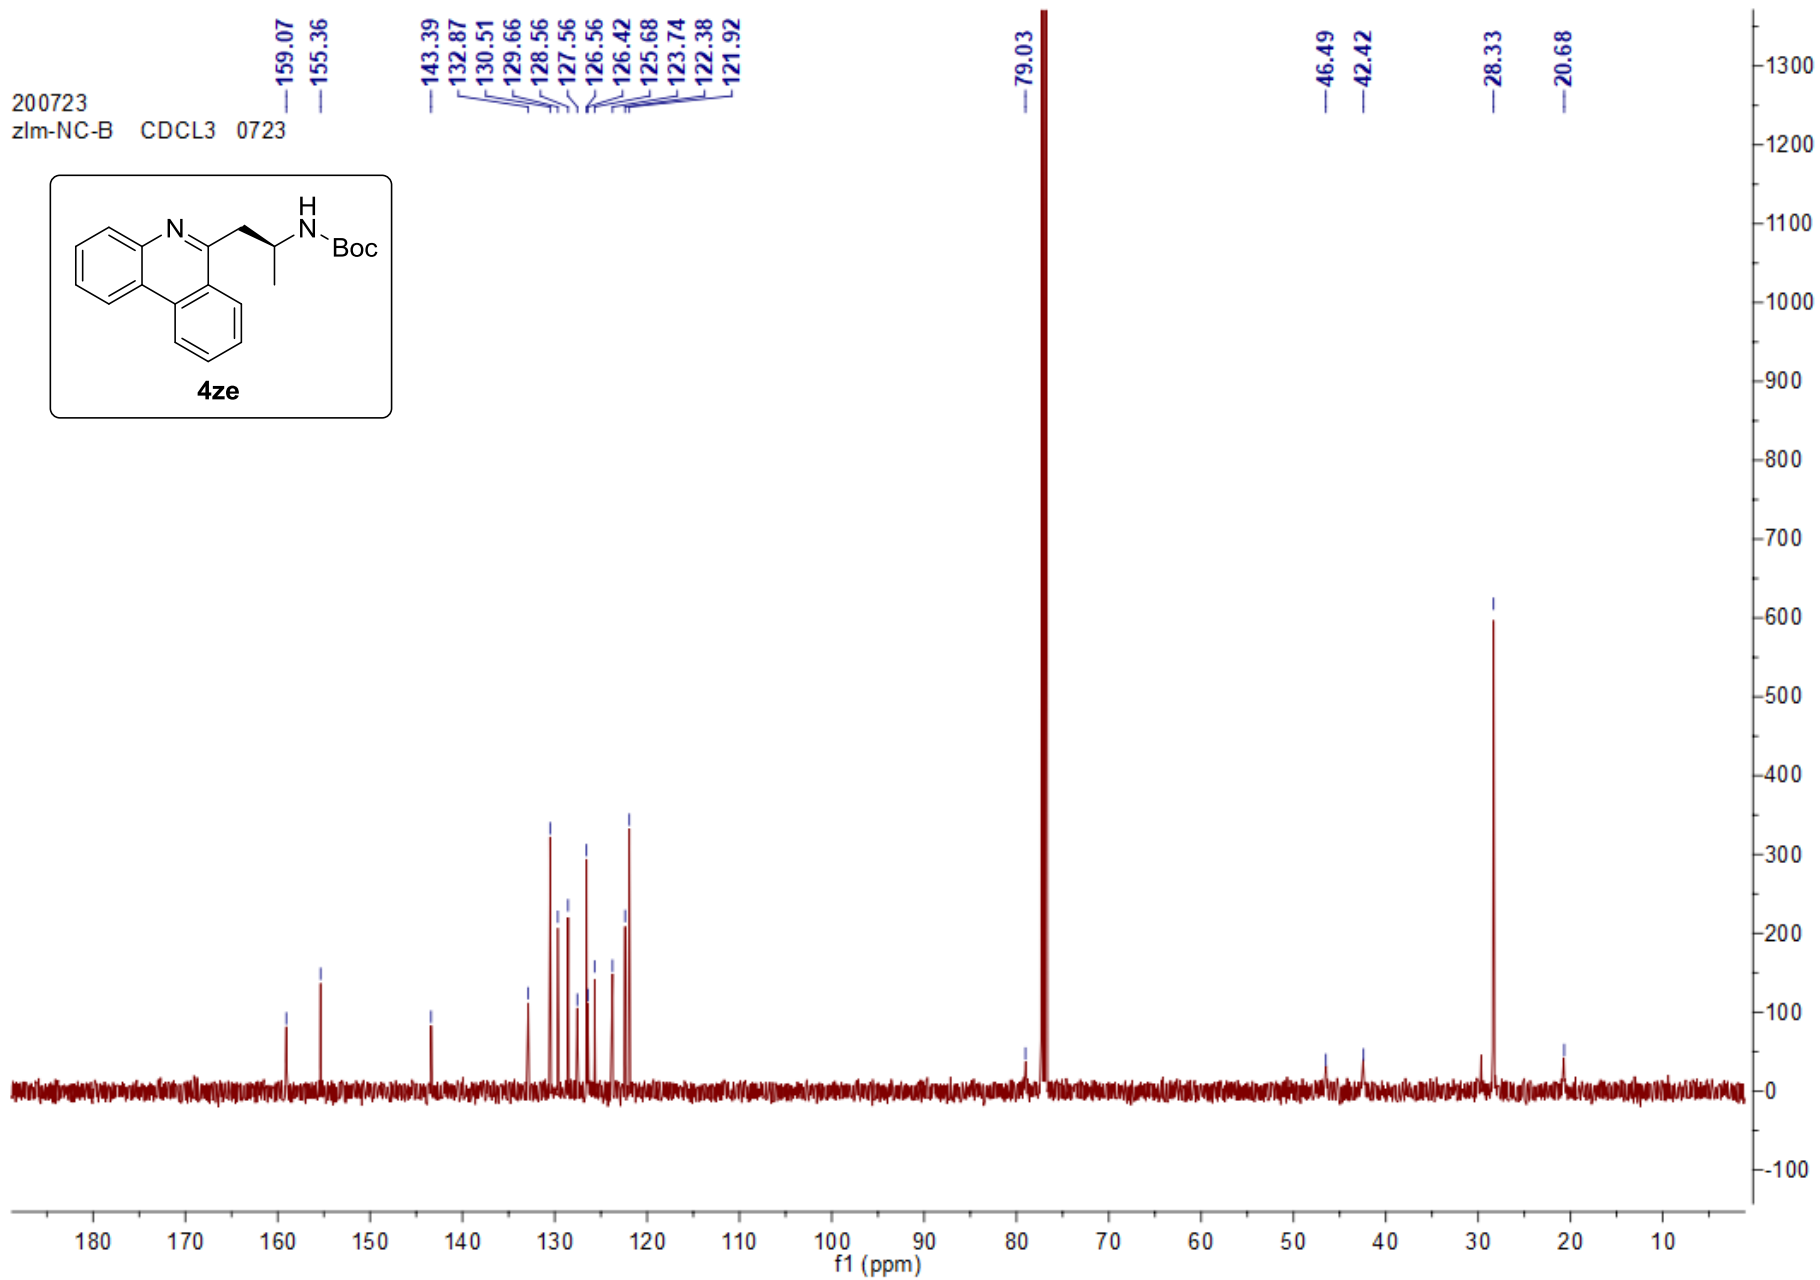

200720  
zlm-NC-BB CDCl3 0720

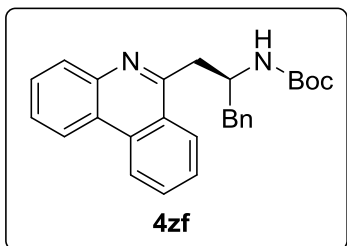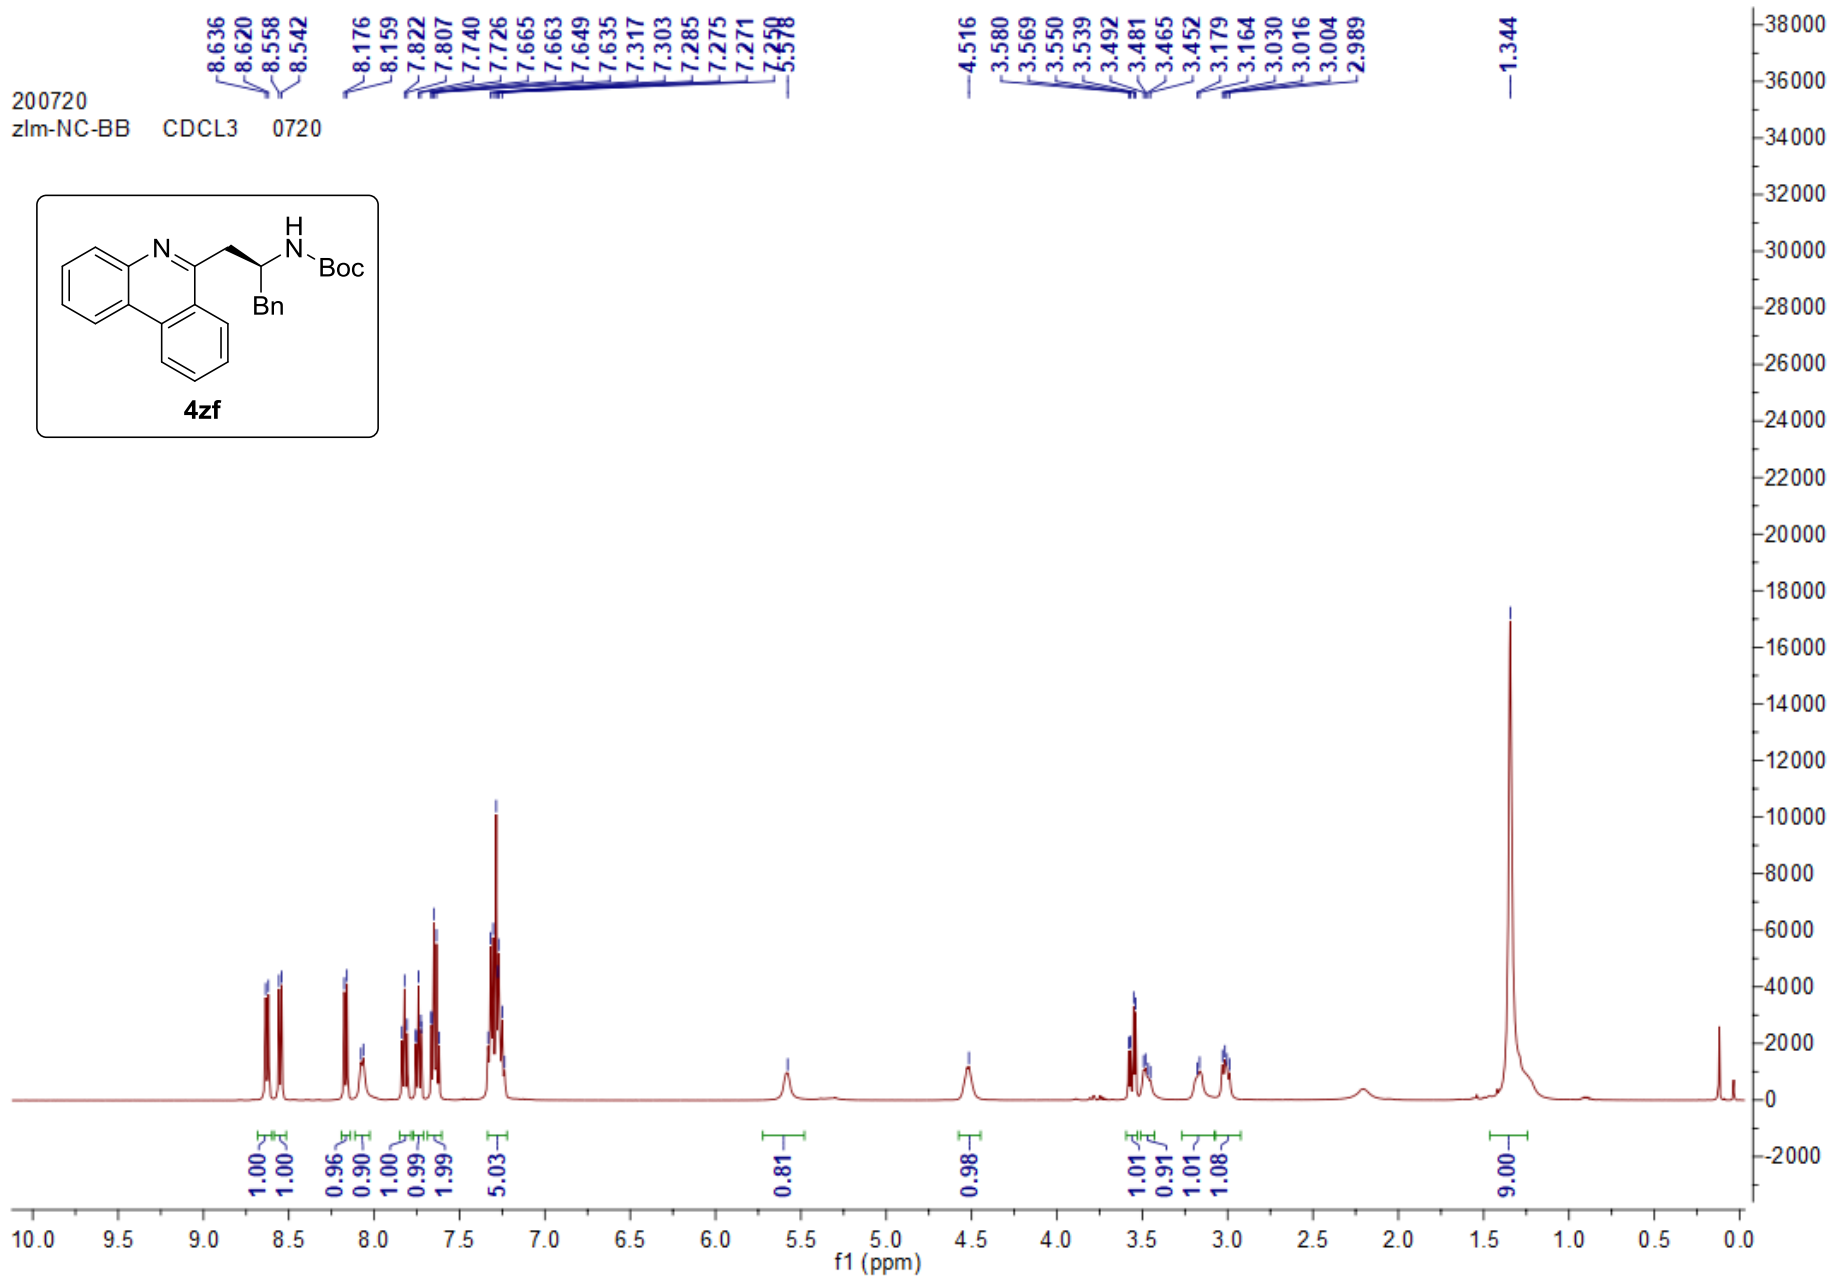

200723  
zlm-NC-BB CDCL3 0723

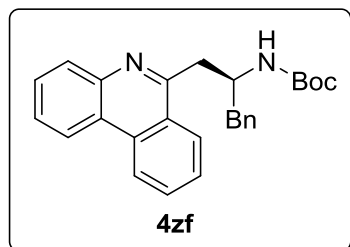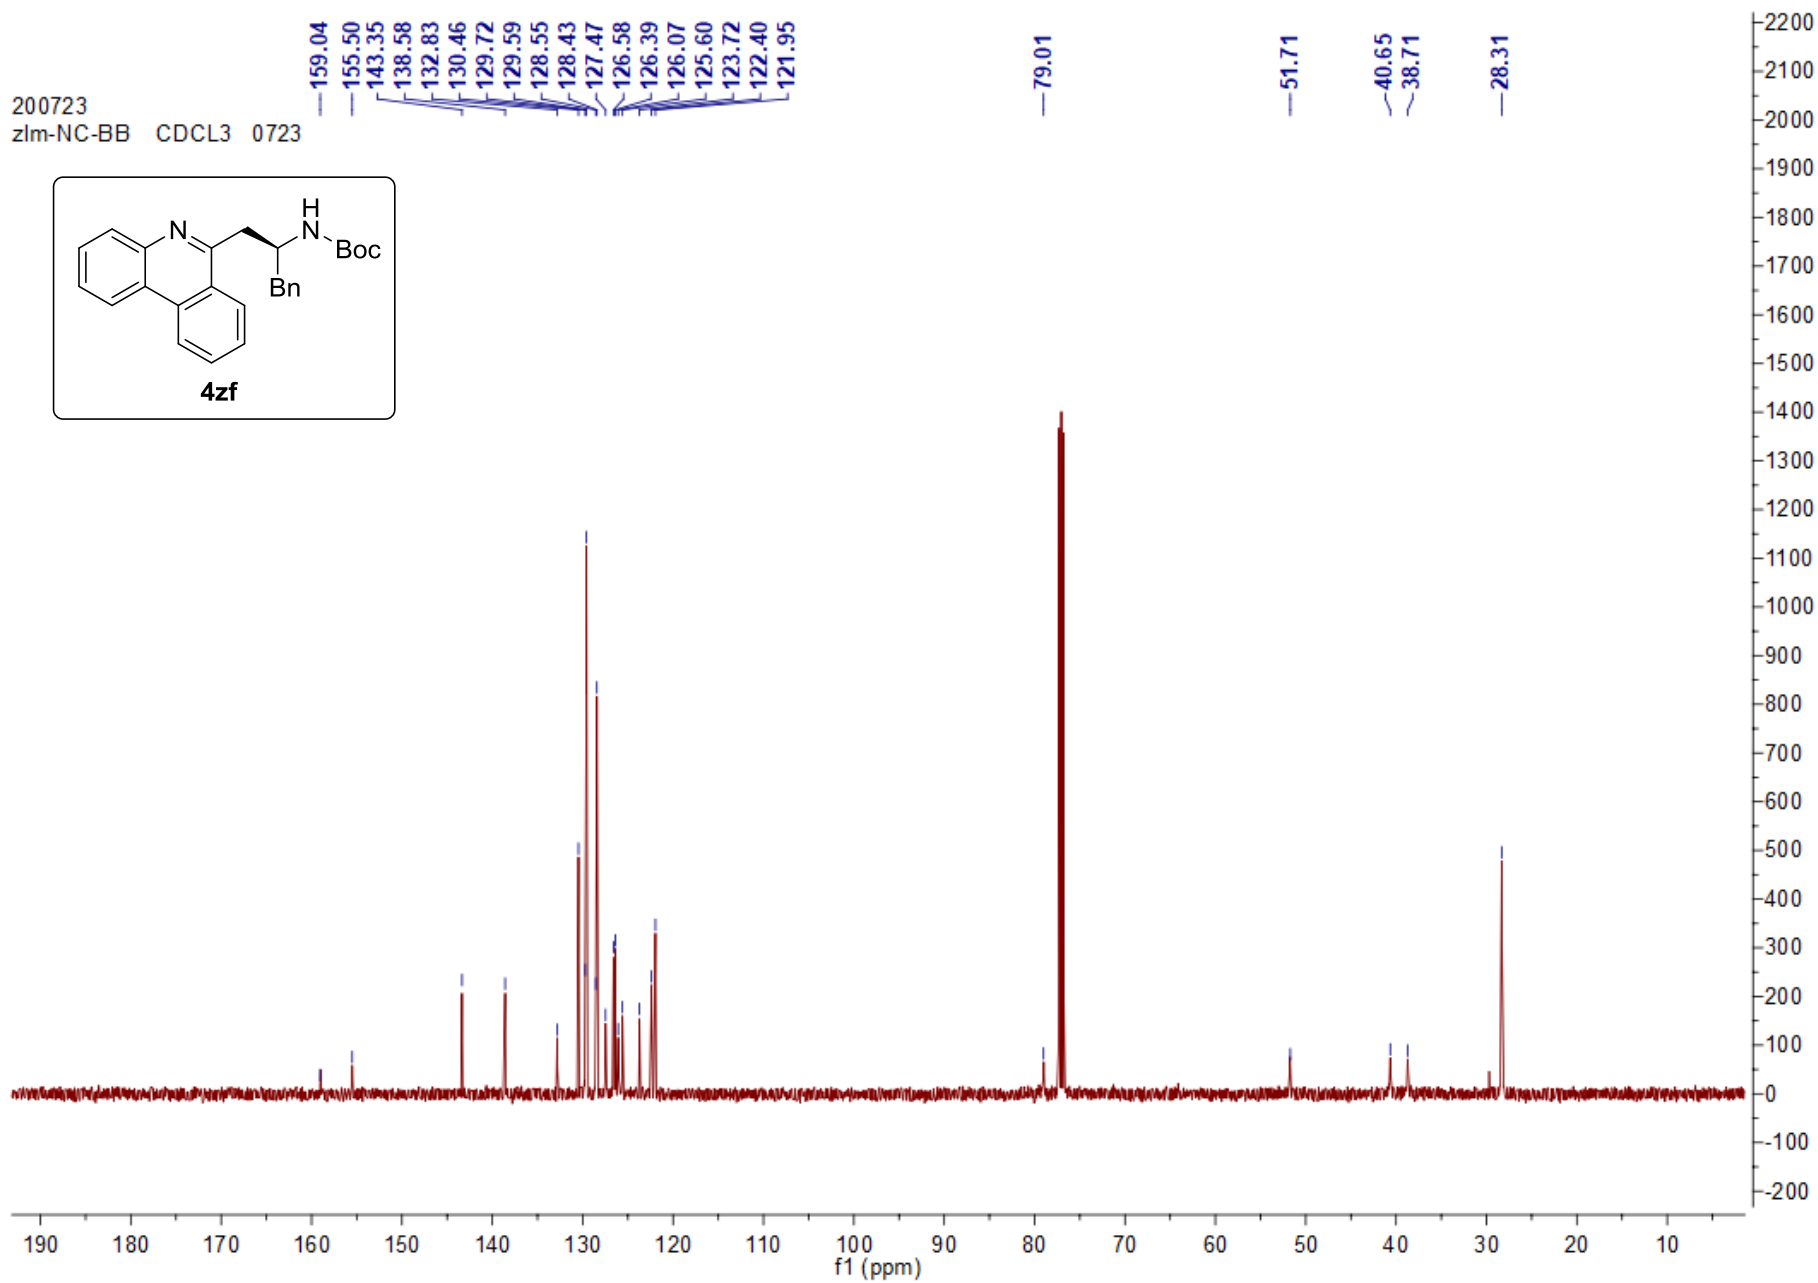



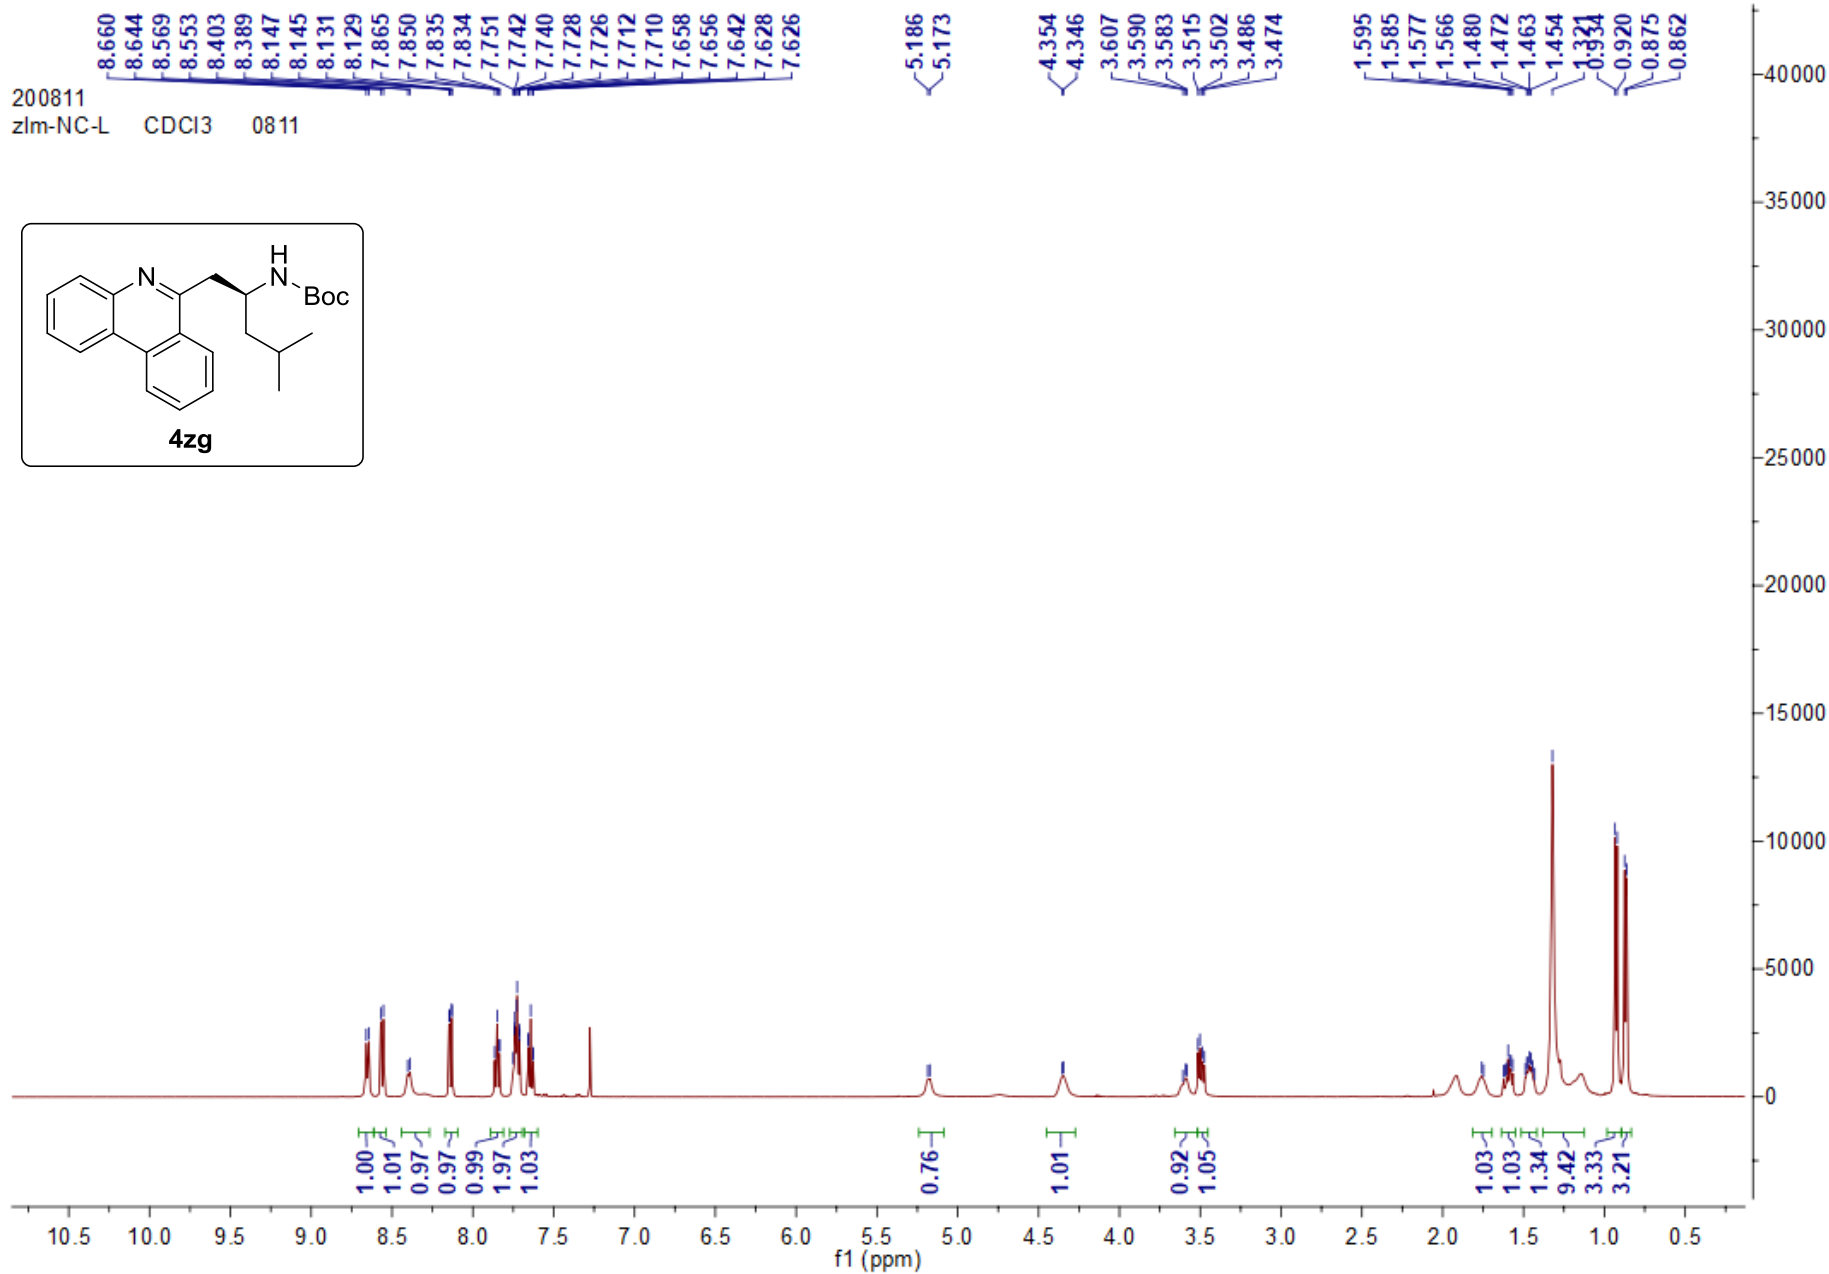

200811  
zlm-NC-L CDCl3 0811

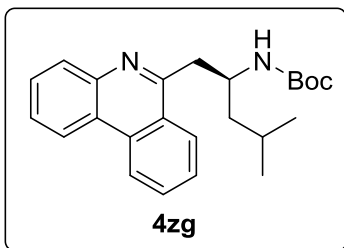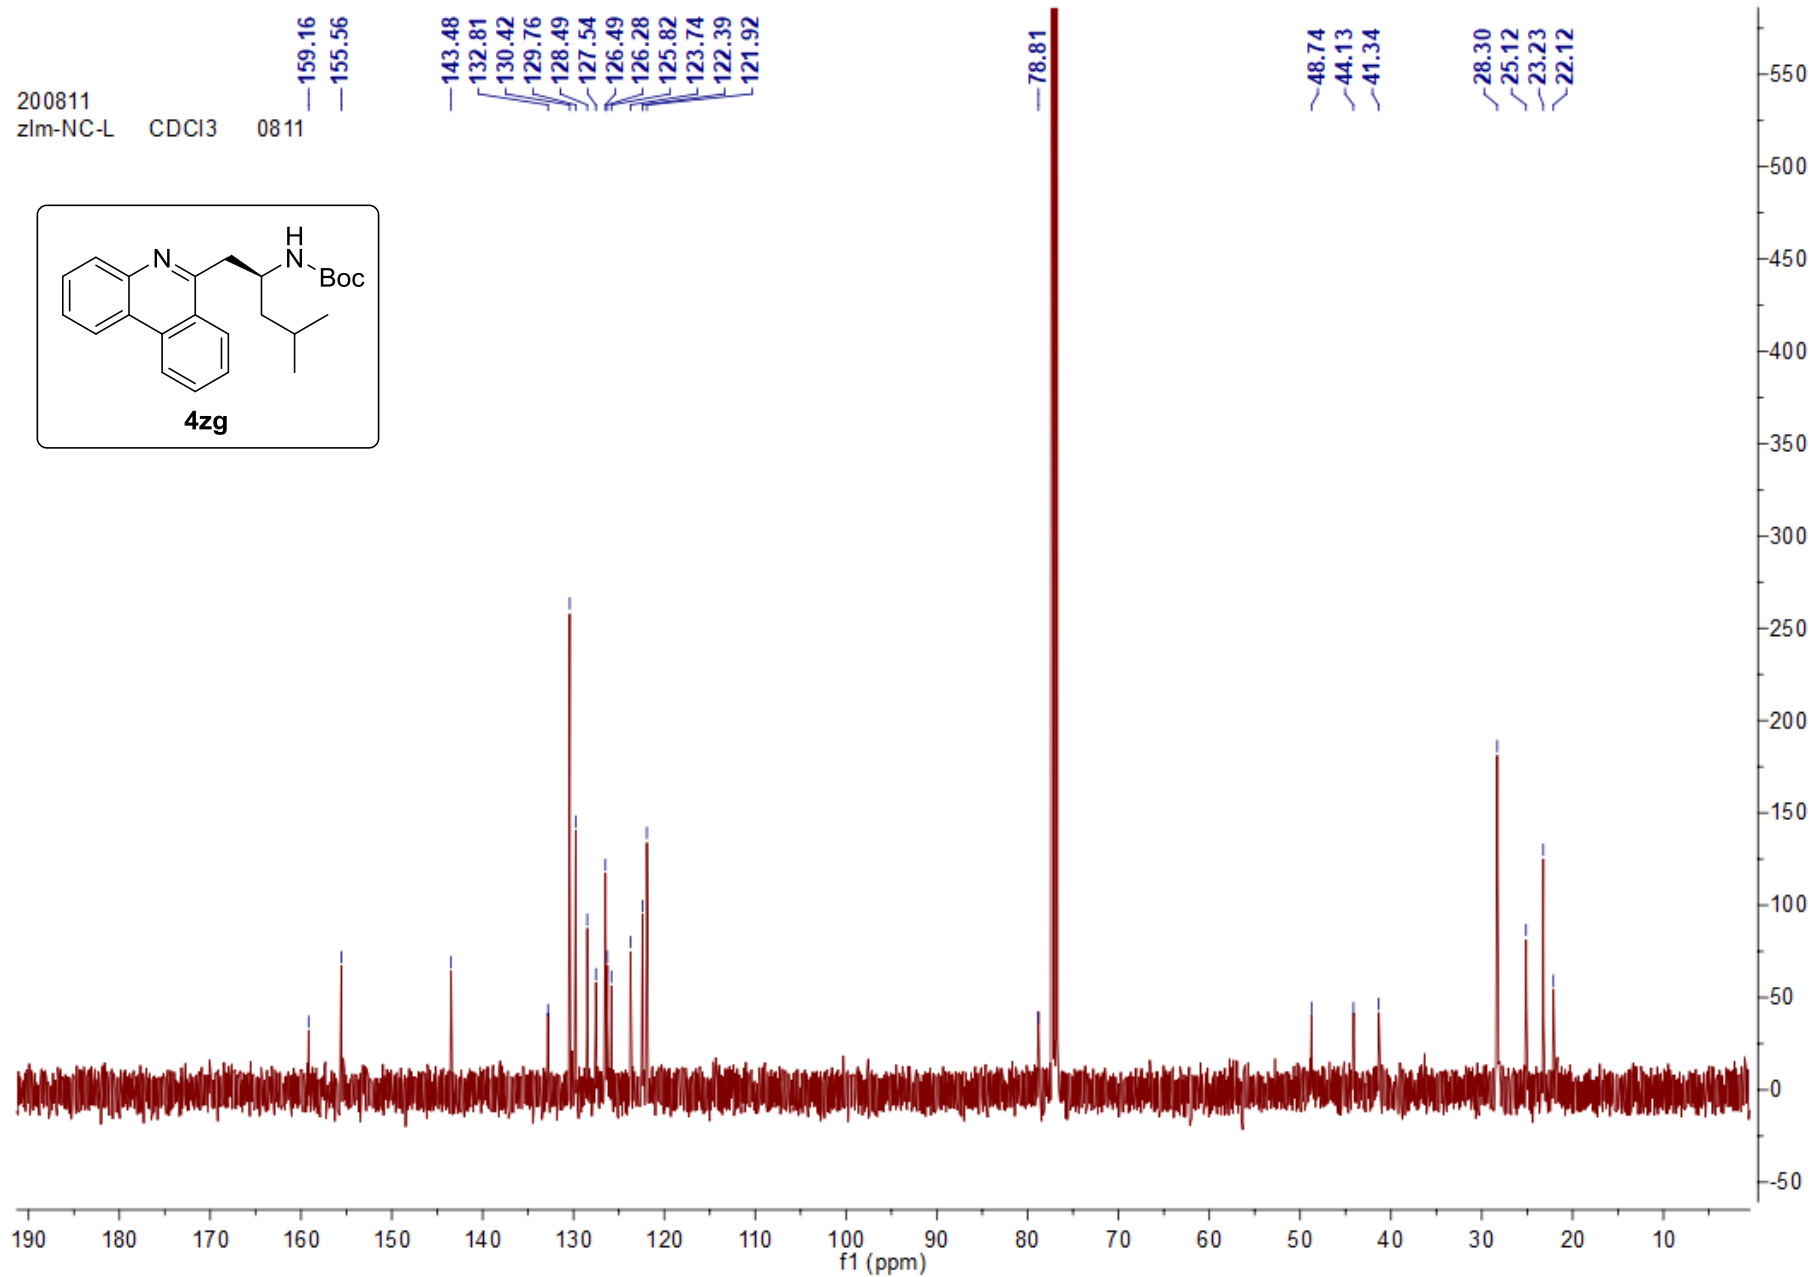

200619  
BHY-F-N-Boc-paiding CDCL3 0619

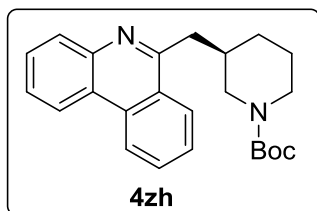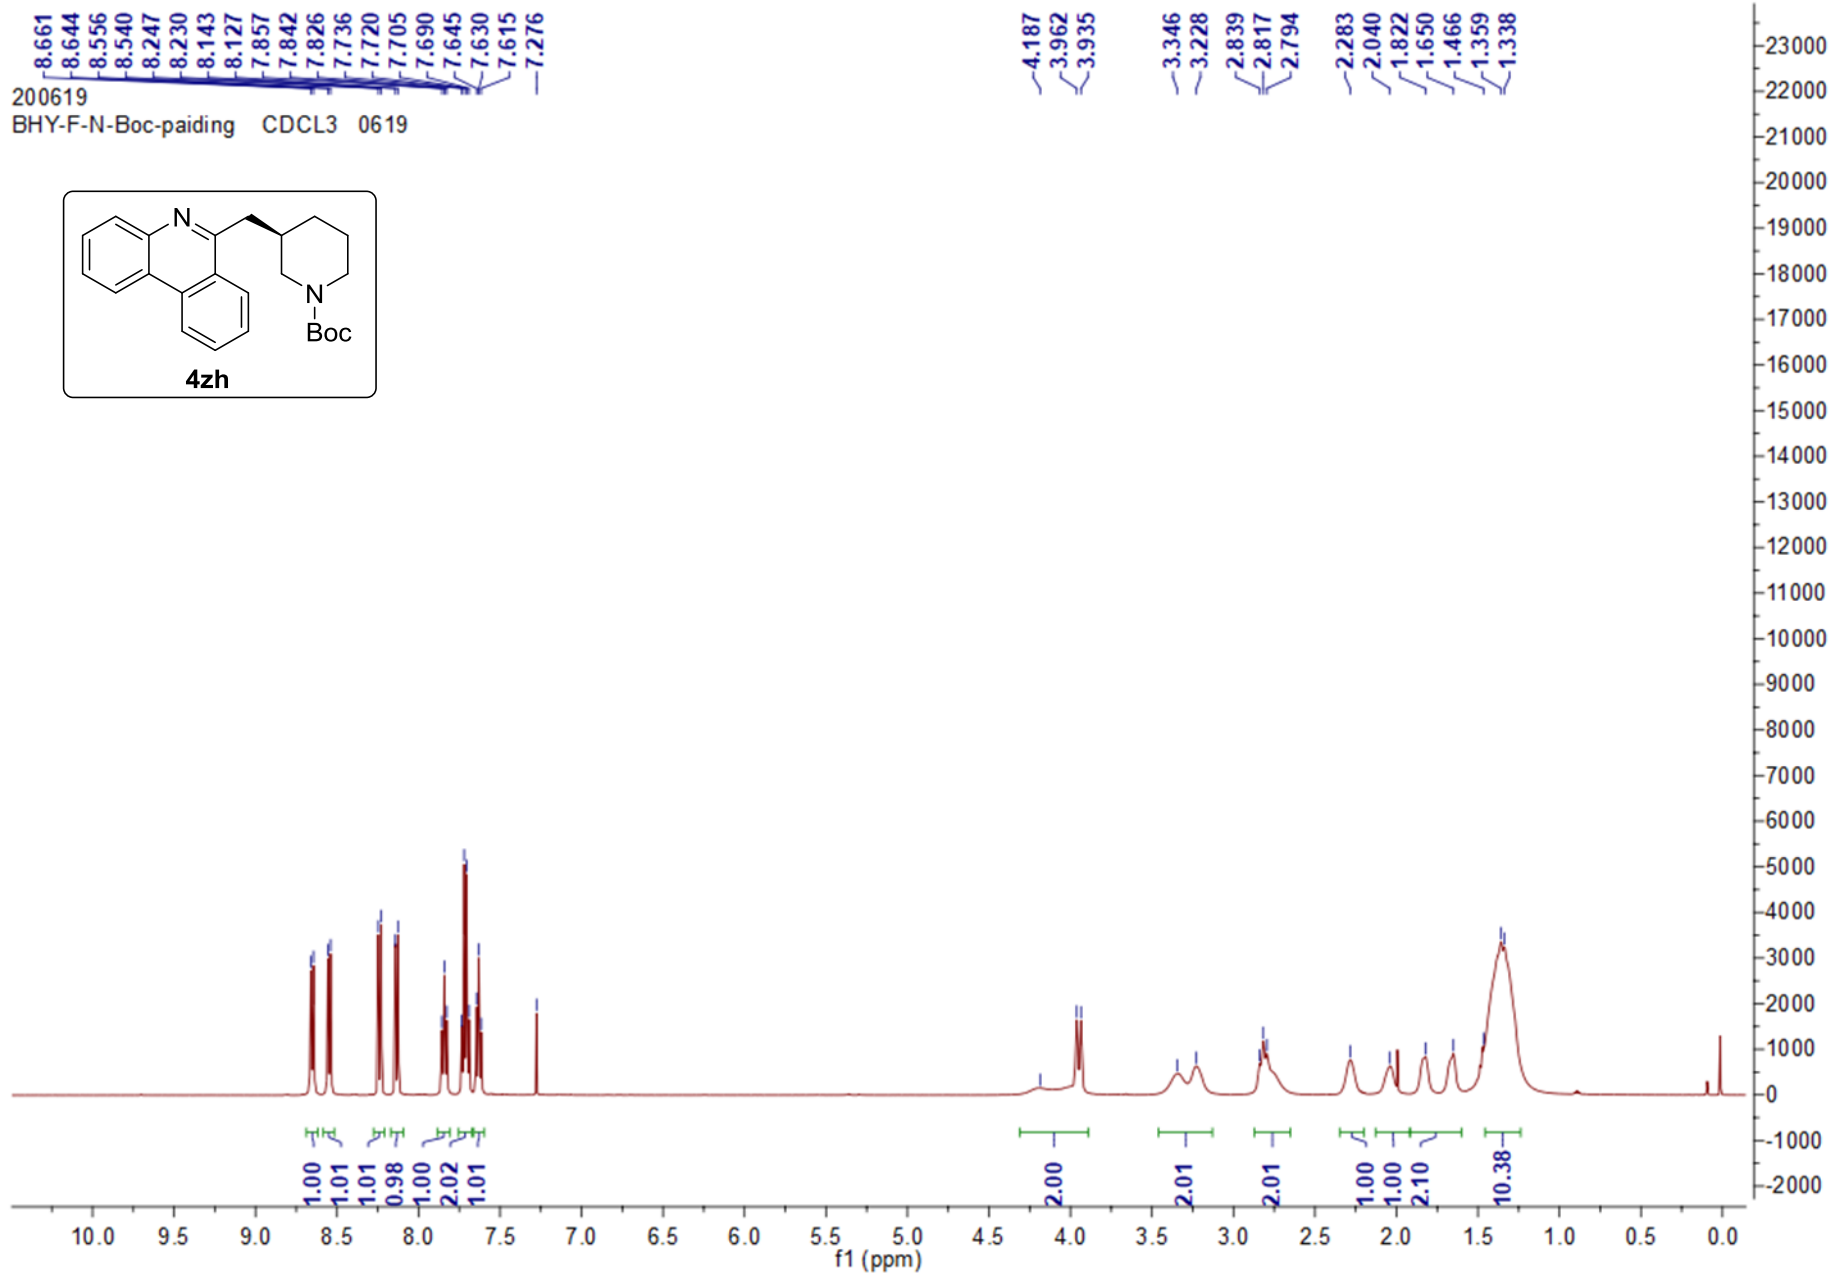

200619  
BHY-F-N-Boc-paiding CDCL3 0619

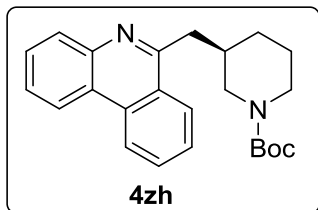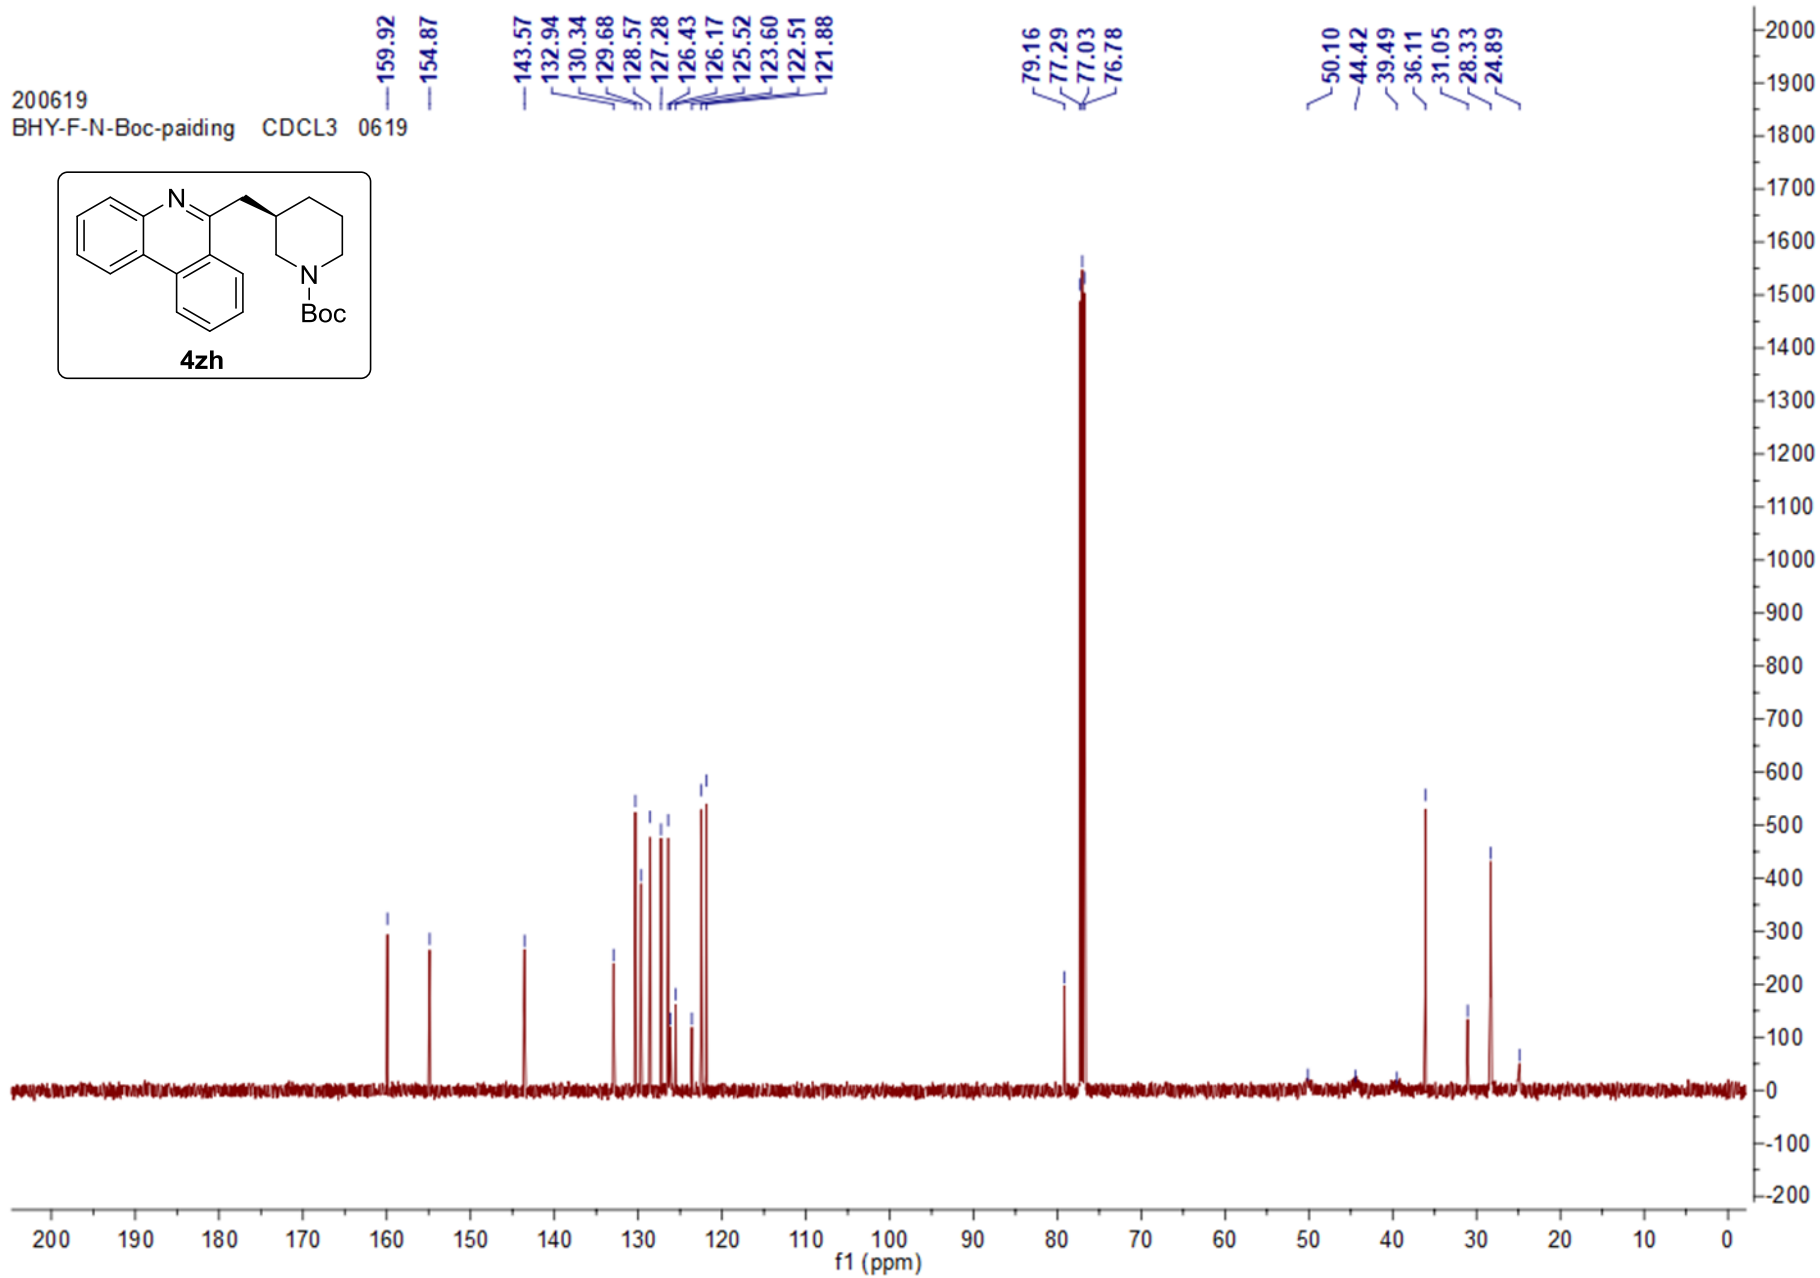

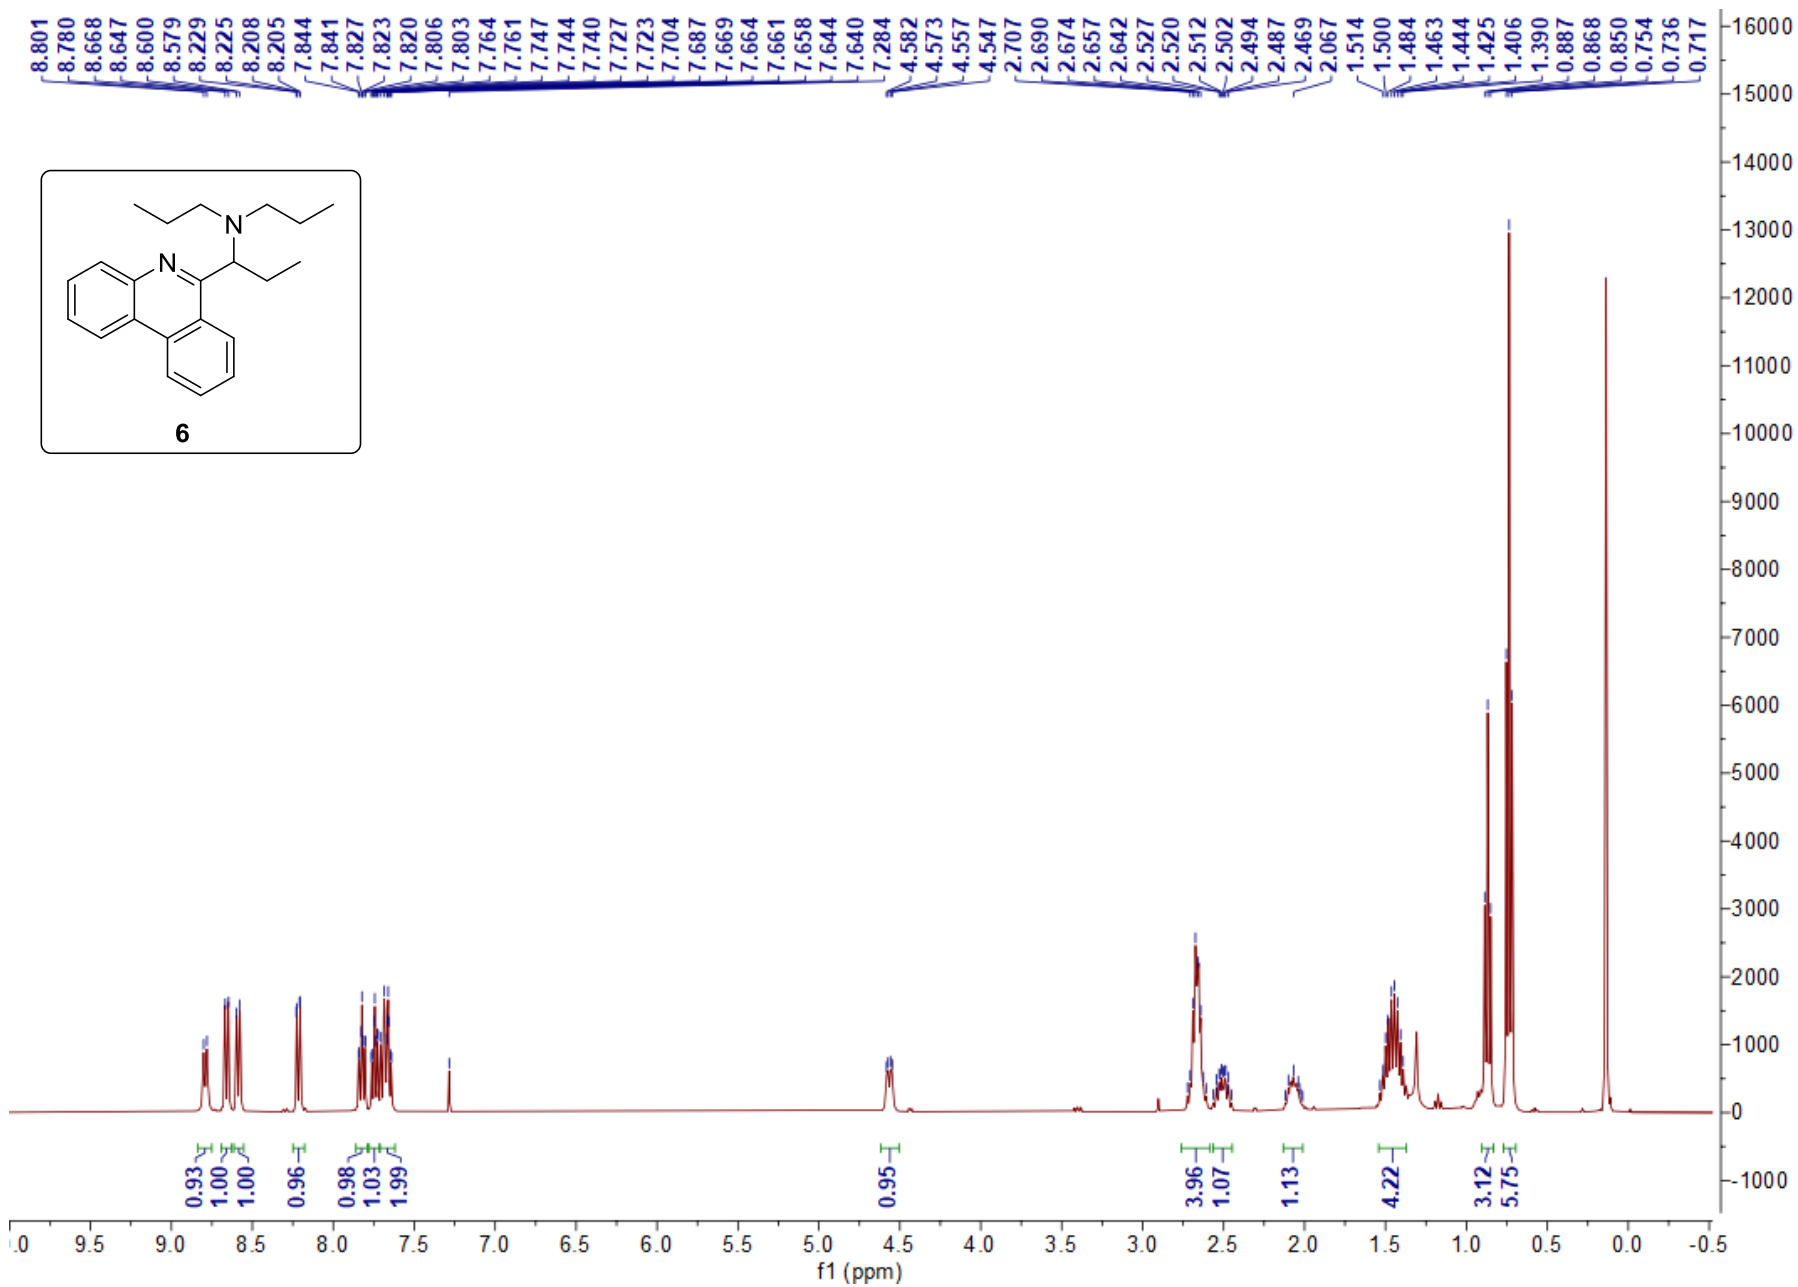

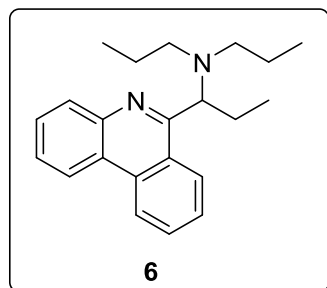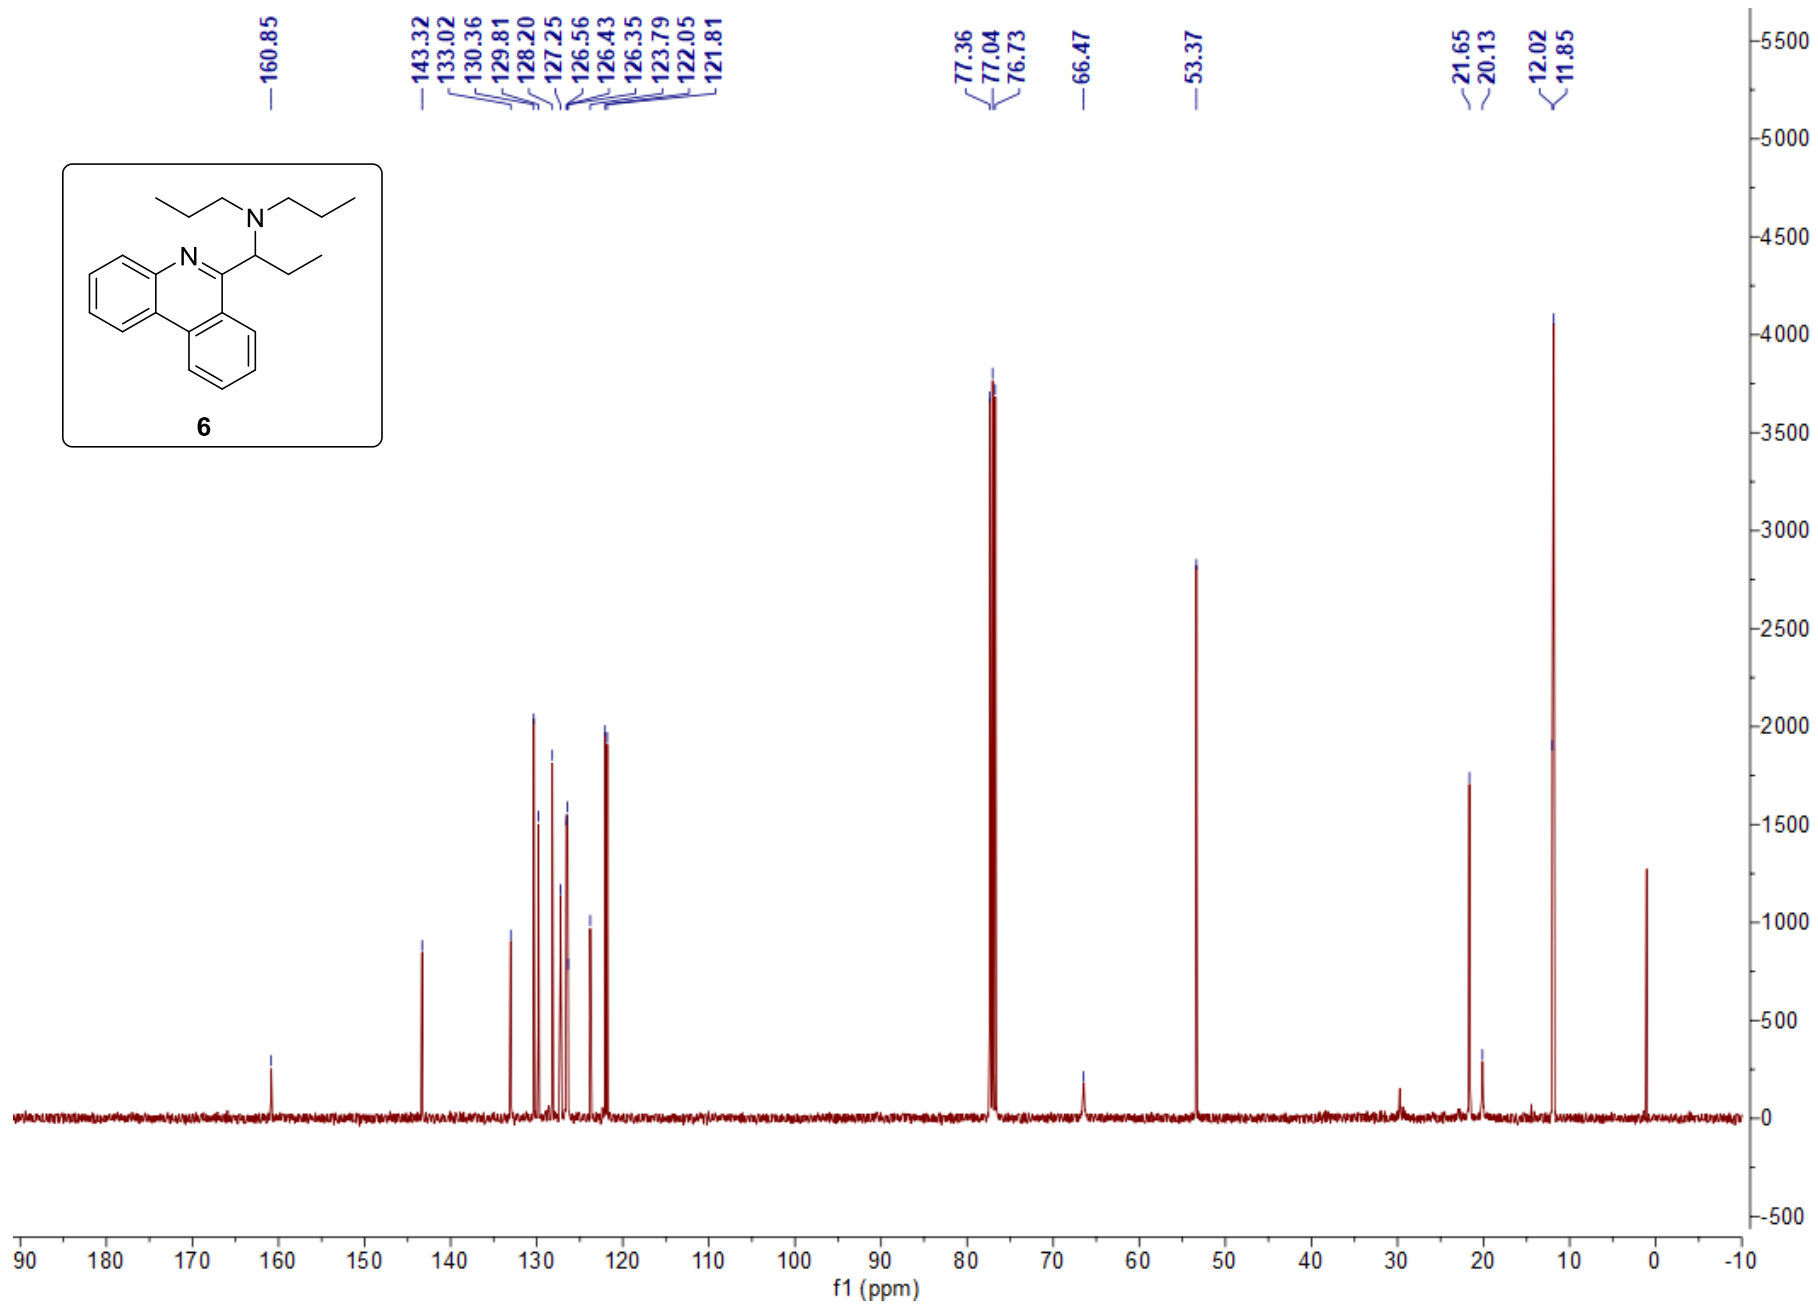

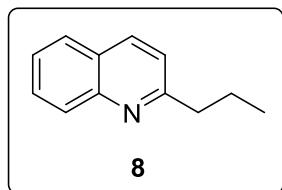

8.093  
8.072  
7.799  
7.779  
7.719  
7.698  
7.677  
7.518  
7.498  
7.478  
7.325  
7.304

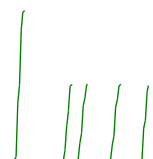

3.000  
2.981  
2.961

1.920  
1.901  
1.882  
1.863  
1.844  
1.826

1.062  
1.044  
1.025

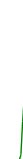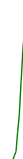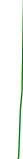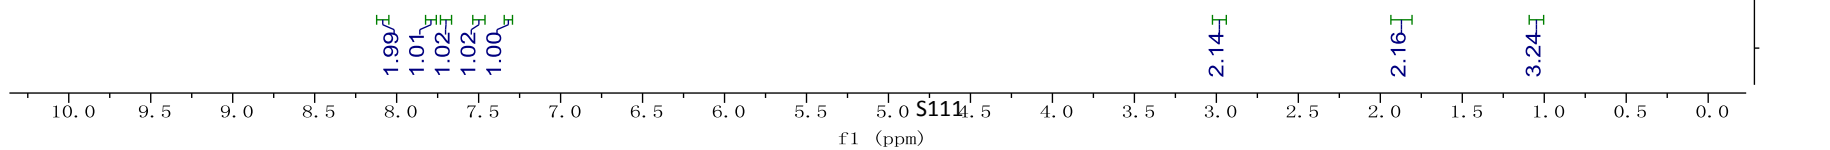

S111

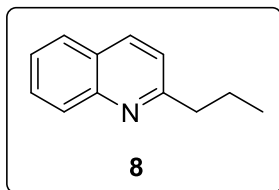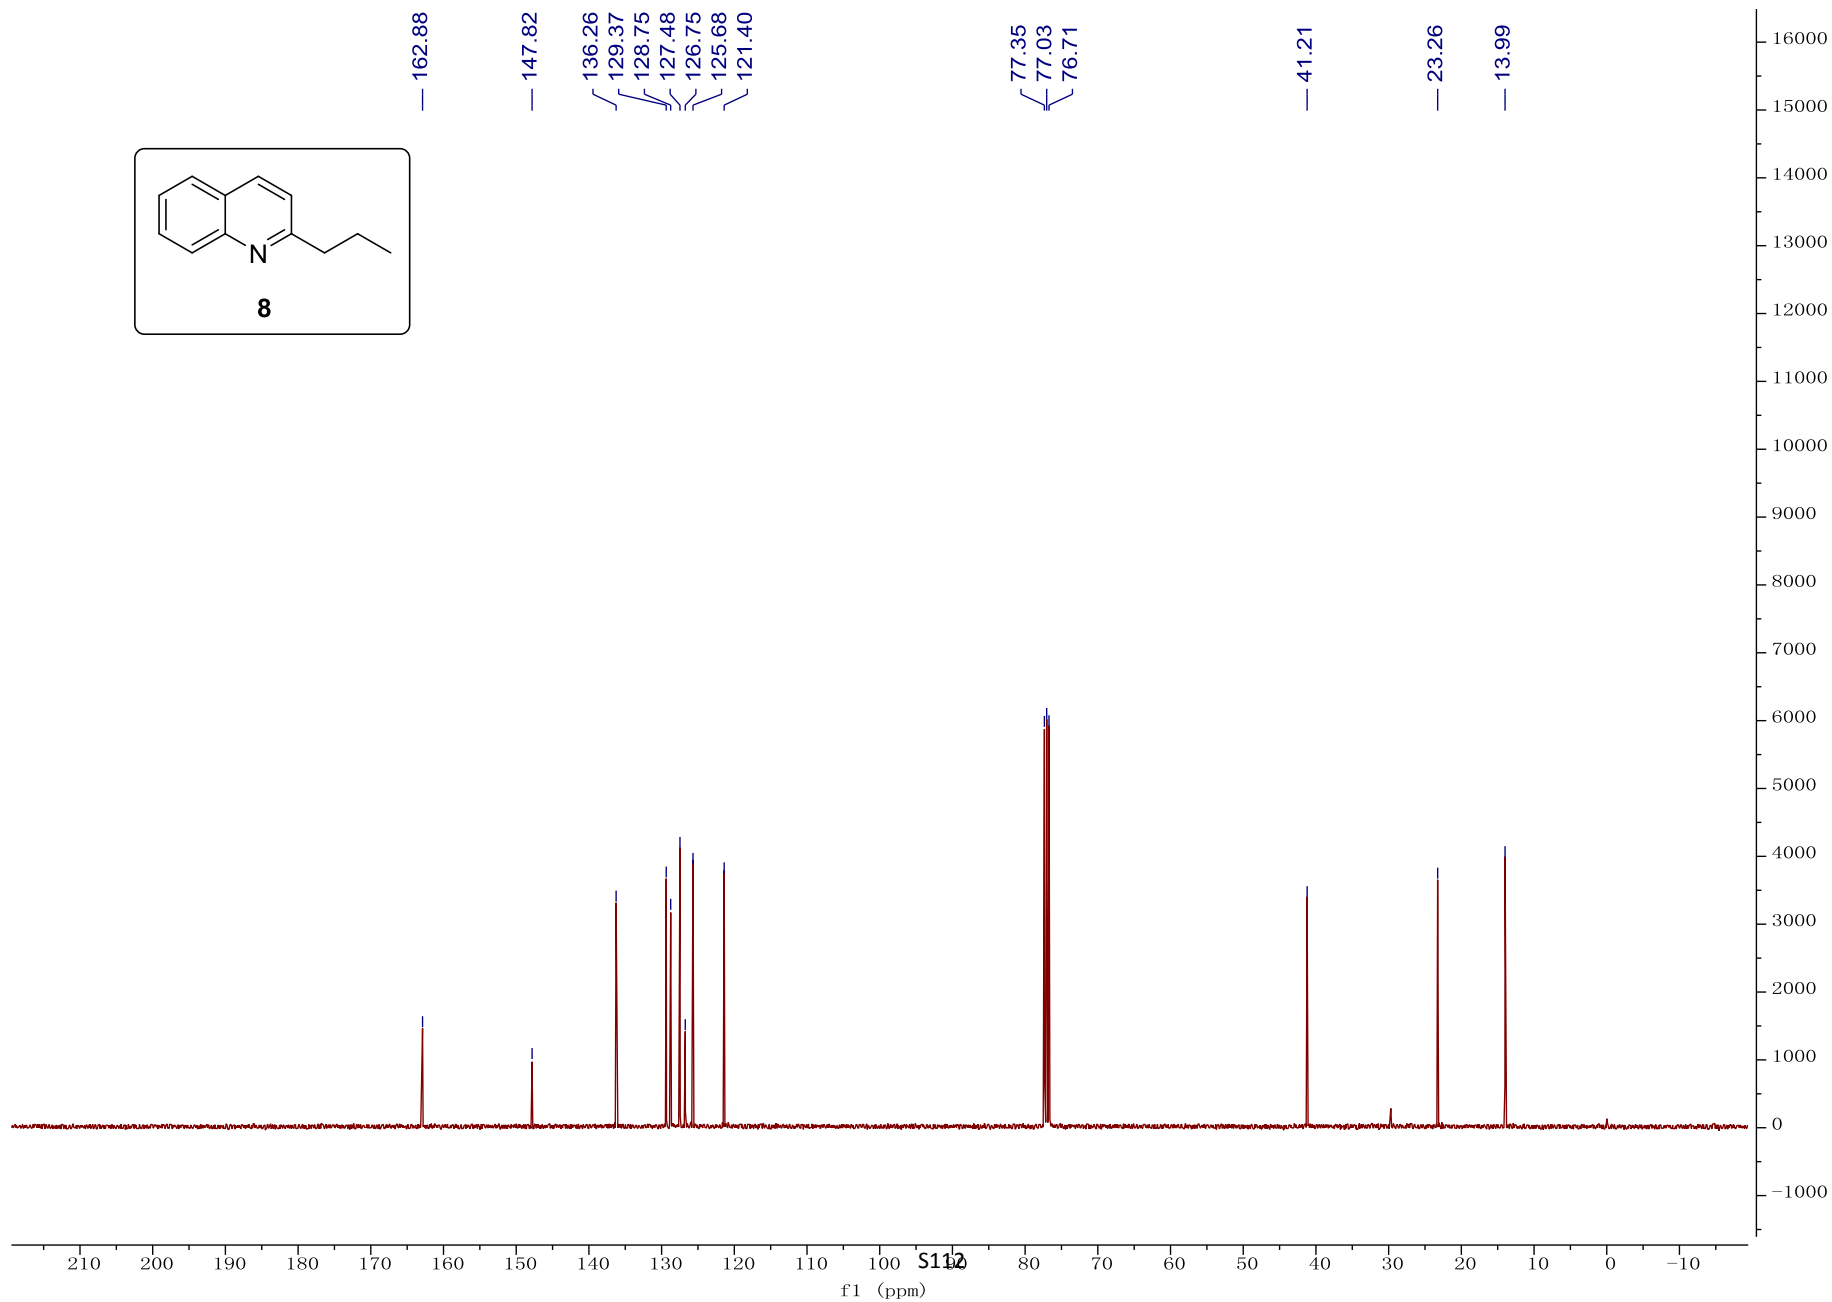

Supplement: d3qo01059g1.pdf [file d3qo01059g1.pdf]
